# Supplementary material
Source: publisher figshare collection journal article supplement (https://acs.figshare.com/ndownloader/files/8357162)
Supplement: Supplementary file 1 [file 8357162]

data_jw1813


_vrf_PLAT_088_jw1813
;
PROBLEM: Poor Data / Parameter Ratio ... 2.98
RESPONSE: This comes from the two C70 molecules that has been refined with 
anisotropic atom displacement parameters (this add 140 * 6 - 840 parameters). 
As all of them are refined with a lot of applied restrains (DELU+SIMU), this 
does not compromise the refinement.
;


_audit_creation_date              2016-10-31
_audit_creation_method
;
Olex2 1.2
(compiled 2016.09.09 svn.r3337 for OlexSys, GUI svn.r5227)
;
_publ_contact_author_address      ?
_publ_contact_author_email        ?
_publ_contact_author_id_orcid     ?
_publ_contact_author_name         ''
_publ_contact_author_phone        ?
_publ_section_references
;
Dolomanov, O.V., Bourhis, L.J., Gildea, R.J, Howard, J.A.K. & Puschmann, H.
 (2009), J. Appl. Cryst. 42, 339-341.

Sheldrick, G.M. (2015). Acta Cryst. A71, 3-8.

Sheldrick, G.M. (2015). Acta Cryst. C71, 3-8.
;
_chemical_name_common             ?
_chemical_name_systematic         ?
_chemical_formula_moiety          '2(C20 H8 N6 S3), C3 S6, 1(C70)'
_chemical_formula_sum             'C113 H16 N12 S12'
_chemical_formula_weight          1926.07
_chemical_melting_point           ?
loop_
  _atom_type_symbol
  _atom_type_description
  _atom_type_scat_dispersion_real
  _atom_type_scat_dispersion_imag
  _atom_type_scat_source
 'C' 'C' 0.0140 0.0070 'International Tables Vol C Tables 4.2.6.8 and 6.1.1.4'
 'H' 'H' 0.0000 0.0000 'International Tables Vol C Tables 4.2.6.8 and 6.1.1.4'
 'N' 'N' 0.0250 0.0140 'International Tables Vol C Tables 4.2.6.8 and 6.1.1.4'
 'S' 'S' 0.2920 0.4250 'International Tables Vol C Tables 4.2.6.8 and 6.1.1.4'

_shelx_space_group_comment
;
The symmetry employed for this shelxl refinement is uniquely defined
by the following loop, which should always be used as a source of
symmetry information in preference to the above space-group names.
They are only intended as comments.
;
_space_group_crystal_system       'cubic'
_space_group_IT_number            205
_space_group_name_H-M_alt         'P a -3'
_space_group_name_Hall            '-P 2ac 2ab 3'
loop_
  _space_group_symop_operation_xyz
 'x, y, z'
 '-x+1/2, -y, z+1/2'
 '-x, y+1/2, -z+1/2'
 'x+1/2, -y+1/2, -z'
 'z, x, y'
 'z+1/2, -x+1/2, -y'
 '-z+1/2, -x, y+1/2'
 '-z, x+1/2, -y+1/2'
 'y, z, x'
 '-y, z+1/2, -x+1/2'
 'y+1/2, -z+1/2, -x'
 '-y+1/2, -z, x+1/2'
 '-x, -y, -z'
 'x-1/2, y, -z-1/2'
 'x, -y-1/2, z-1/2'
 '-x-1/2, y-1/2, z'
 '-z, -x, -y'
 '-z-1/2, x-1/2, y'
 'z-1/2, x, -y-1/2'
 'z, -x-1/2, y-1/2'
 '-y, -z, -x'
 'y, -z-1/2, x-1/2'
 '-y-1/2, z-1/2, x'
 'y-1/2, z, -x-1/2'

_cell_length_a                    19.5040(3)
_cell_length_b                    19.5040(3)
_cell_length_c                    19.5040(3)
_cell_angle_alpha                 90
_cell_angle_beta                  90
_cell_angle_gamma                 90
_cell_volume                      7419.4(3)
_cell_formula_units_Z             4
_cell_measurement_reflns_used     9917
_cell_measurement_temperature     100
_cell_measurement_theta_max       60.642
_cell_measurement_theta_min       3.416
_shelx_estimated_absorpt_T_max    0.863
_shelx_estimated_absorpt_T_min    0.787
_exptl_absorpt_coefficient_mu     2.521
_exptl_absorpt_correction_T_max   0.3404
_exptl_absorpt_correction_T_min   0.2600
_exptl_absorpt_correction_type    multi-scan
_exptl_absorpt_process_details
;
SADABS-2014/5 (Bruker,2014/5) was used for absorption correction.
wR2(int) was 0.1281 before and 0.0488 after correction.
The Ratio of minimum to maximum transmission is 0.7638.
The \l/2 correction factor is 0.00150.
;
_exptl_absorpt_special_details    ?
_exptl_crystal_colour             'dull dark brown'
_exptl_crystal_colour_lustre      dull
_exptl_crystal_colour_modifier    dark
_exptl_crystal_colour_primary     brown
_exptl_crystal_density_diffrn     1.724
_exptl_crystal_density_meas       ?
_exptl_crystal_density_method     ?
_exptl_crystal_description        block
_exptl_crystal_F_000              3880
_exptl_crystal_preparation        ?
_exptl_crystal_recrystallization_method 'Crystallized in CS2'
_exptl_crystal_size_max           0.1
_exptl_crystal_size_mid           0.08
_exptl_crystal_size_min           0.06
_exptl_special_details
;
X-ray crystallographic data for I were collected from a single crystal
sample, which was mounted on a loop fiber. Data were collected using
a Bruker Venture diffractometer equipped with a Photon 100 CMOS Detector,
a Helios MX optics and a Kappa goniometer. The crystal-to-detector distance 
was 4.0 cm, and the data collection was carried out in 1024 x 1024 pixel mode.
;
_exptl_transmission_factor_max    ?
_exptl_transmission_factor_min    ?
_diffrn_reflns_av_R_equivalents   0.0348
_diffrn_reflns_av_unetI/netI      0.0086
_diffrn_reflns_Laue_measured_fraction_full 1.000
_diffrn_reflns_Laue_measured_fraction_max 1.000
_diffrn_reflns_limit_h_max        25
_diffrn_reflns_limit_h_min        -25
_diffrn_reflns_limit_k_max        25
_diffrn_reflns_limit_k_min        -25
_diffrn_reflns_limit_l_max        24
_diffrn_reflns_limit_l_min        -25
_diffrn_reflns_number             77875
_diffrn_reflns_point_group_measured_fraction_full 1.000
_diffrn_reflns_point_group_measured_fraction_max 1.000
_diffrn_reflns_theta_full         53.594
_diffrn_reflns_theta_max          60.610
_diffrn_reflns_theta_min          3.415
_diffrn_ambient_temperature       100
_diffrn_detector                  'CMOS Area detector'
_diffrn_detector_area_resol_mean  10.24
_diffrn_detector_type             'Bruker Photon 100 CMOS Detector'
_diffrn_measured_fraction_theta_full 1.000
_diffrn_measured_fraction_theta_max 1.000
_diffrn_measurement_device        'k-geometry diffractometer'
_diffrn_measurement_device_type   'Bruker Venture Metaljet'
_diffrn_measurement_method        '\w and \f scans'
_diffrn_radiation_collimation     'Focusing mirrors'
_diffrn_radiation_monochromator   'Helios MX Mirror Optics'
_diffrn_radiation_probe           X-ray
_diffrn_radiation_type            GaK\a
_diffrn_radiation_wavelength      1.34139
_diffrn_source                    'Metal Jet'
_diffrn_source_target             Ga
_diffrn_source_type               'Gallium Liquid Metal Jet Source'
_reflns_Friedel_coverage          0.000
_reflns_Friedel_fraction_full     .
_reflns_Friedel_fraction_max      .
_reflns_number_gt                 2584
_reflns_number_total              2853
_reflns_special_details
;
 Reflections were merged by SHELXL according to the crystal
 class for the calculation of statistics and refinement.
 
 _reflns_Friedel_fraction is defined as the number of unique
 Friedel pairs measured divided by the number that would be
 possible theoretically, ignoring centric projections and
 systematic absences.
;
_reflns_threshold_expression      'I > 2\s(I)'
_computing_cell_refinement
;
SAINT (2013) V8.34A; Integration Software for Single Crystal Data.
Bruker AXS Inc., Madison, WI 53719-1173.
;
_computing_data_collection
;
APEX 2 (2013) Bruker AXS Inc., Madison, WI 53719-1173.
;
_computing_data_reduction
;
SAINT (2013) V8.34A; Integration Software for Single Crystal Data.
Bruker AXS Inc., Madison, WI 53719-1173.
;
_computing_molecular_graphics     'Olex2 (Dolomanov et al., 2009)'
_computing_publication_material   'Olex2 (Dolomanov et al., 2009)'
_computing_structure_refinement   'ShelXL (Sheldrick, 2015)'
_computing_structure_solution     'ShelXT (Sheldrick, 2015)'
_refine_diff_density_max          0.839
_refine_diff_density_min          -0.563
_refine_diff_density_rms          0.076
_refine_ls_extinction_coef        .
_refine_ls_extinction_method      none
_refine_ls_goodness_of_fit_ref    1.208
_refine_ls_hydrogen_treatment     constr
_refine_ls_matrix_type            full
_refine_ls_number_parameters      958
_refine_ls_number_reflns          2853
_refine_ls_number_restraints      3396
_refine_ls_R_factor_all           0.0686
_refine_ls_R_factor_gt            0.0641
_refine_ls_restrained_S_all       0.808
_refine_ls_shift/su_max           0.002
_refine_ls_shift/su_mean          0.000
_refine_ls_structure_factor_coef  Fsqd
_refine_ls_weighting_details
'w=1/[\s^2^(Fo^2^)+(0.0970P)^2^+10.7014P] where P=(Fo^2^+2Fc^2^)/3'
_refine_ls_weighting_scheme       calc
_refine_ls_wR_factor_gt           0.1724
_refine_ls_wR_factor_ref          0.1774
_refine_special_details           ?
_olex2_refinement_description
;
1. Fixed Uiso
 At 1.2 times of:
  All C(H) groups
2. Rigid bond restraints
 All non-hydrogen atoms
 with sigma for 1-2 distances of 0.01 and sigma for 1-3 distances of 0.001
3. Uiso/Uaniso restraints and constraints
All non-hydrogen atoms have similar U: within 1.7A with sigma of 0.01 and sigma
for terminal atoms of 0.002
4. Others
 Fixed Sof: C9(0.5) C1A(0.08333) C2A(0.08333) C3A(0.08333) C4A(0.08333)
 C5A(0.08333) C6A(0.08333) C7A(0.08333) C8A(0.08333) C9A(0.08333) C10A(0.08333)
 C11A(0.08333) C12A(0.08333) C13A(0.08333) C14A(0.08333) C15A(0.08333)
 C16A(0.08333) C17A(0.08333) C18A(0.08333) C19A(0.08333) C20A(0.08333)
 C21A(0.08333) C22A(0.08333) C23A(0.08333) C24A(0.08333) C25A(0.08333)
 C26A(0.08333) C27A(0.08333) C28A(0.08333) C29A(0.08333) C30A(0.08333)
 C31A(0.08333) C32A(0.08333) C33A(0.08333) C34A(0.08333) C35A(0.08333)
 C36A(0.08333) C37A(0.08333) C38A(0.08333) C39A(0.08333) C40A(0.08333)
 C41A(0.08333) C42A(0.08333) C43A(0.08333) C44A(0.08333) C45A(0.08333)
 C46A(0.08333) C47A(0.08333) C48A(0.08333) C49A(0.08333) C50A(0.08333)
 C51A(0.08333) C52A(0.08333) C53A(0.08333) C54A(0.08333) C55A(0.08333)
 C56A(0.08333) C57A(0.08333) C58A(0.08333) C59A(0.08333) C60A(0.08333)
 C61A(0.08333) C62A(0.08333) C63A(0.08333) C64A(0.08333) C65A(0.08333)
 C66A(0.08333) C67A(0.08333) C68A(0.08333) C69A(0.08333) C70A(0.08333)
 C1B(0.08333) C2B(0.08333) C3B(0.08333) C4B(0.08333) C5B(0.08333) C6B(0.08333)
 C7B(0.08333) C8B(0.08333) C9B(0.08333) C10B(0.08333) C11B(0.08333)
 C12B(0.08333) C13B(0.08333) C14B(0.08333) C15B(0.08333) C16B(0.08333)
 C17B(0.08333) C18B(0.08333) C19B(0.08333) C20B(0.08333) C21B(0.08333)
 C22B(0.08333) C23B(0.08333) C24B(0.08333) C25B(0.08333) C26B(0.08333)
 C27B(0.08333) C28B(0.08333) C29B(0.08333) C30B(0.08333) C31B(0.08333)
 C32B(0.08333) C33B(0.08333) C34B(0.08333) C35B(0.08333) C36B(0.08333)
 C37B(0.08333) C38B(0.08333) C39B(0.08333) C40B(0.08333) C41B(0.08333)
 C42B(0.08333) C43B(0.08335) C44B(0.08335) C45B(0.08335) C46B(0.08335)
 C47B(0.08333) C48B(0.08333) C49B(0.08333) C50B(0.08333) C51B(0.08333)
 C52B(0.08333) C53B(0.08333) C54B(0.08333) C55B(0.08333) C56B(0.08333)
 C57B(0.08333) C58B(0.08335) C59B(0.08335) C60B(0.08335) C61B(0.08333)
 C62B(0.08333) C63B(0.08333) C64B(0.08333) C65B(0.08333) C66B(0.08333)
 C67B(0.08333) C68B(0.08333) C69B(0.08333) C70B(0.08333)
5.a Free rotating group:
 C1A(C2A,C3A,C4A,C5A,C6A,C7A,C8A,C9A,C10A,C11A,C12A,C13A,C14A,C15A,C16A,C17A,
 C18A,C19A,C20A,C21A,C22A,C23A,C24A,C25A,C26A,C27A,C28A,C29A,C30A,C31A,C32A,
 C33A,C34A,C35A,C36A,C37A,C38A,C39A,C40A,C41A,C42A,C43A,C44A,C45A,C46A,C47A,
 C48A,C49A,C50A,C51A,C52A,C53A,C54A,C55A,C56A,C57A,C58A,C59A,C60A,C61A,C62A,
 C63A,C64A,C65A,C66A,C67A,C68A,C69A,C70A), C1B(C2B,C3B,C4B,C5B,C6B,C7B,C8B,C9B,
 C10B,C11B,C12B,C13B,C14B,C15B,C16B,C17B,C18B,C19B,C20B,C21B,C22B,C23B,C24B,
 C25B,C26B,C27B,C28B,C29B,C30B,C31B,C32B,C33B,C34B,C35B,C36B,C37B,C38B,C39B,
 C40B,C41B,C42B,C43B,C44B,C45B,C46B,C47B,C48B,C49B,C50B,C51B,C52B,C53B,C54B,
 C55B,C56B,C57B,C58B,C59B,C60B,C61B,C62B,C63B,C64B,C65B,C66B,C67B,C68B,C69B,
 C70B)
5.b Ternary CH refined with riding coordinates:
 C1(H1), C8(H8)
5.c Aromatic/amide H refined with riding coordinates:
 C3(H3), C6(H6)
;
_atom_sites_solution_hydrogens    geom
_atom_sites_solution_primary      direct
_atom_sites_solution_secondary    ?
loop_
  _atom_site_label
  _atom_site_type_symbol
  _atom_site_fract_x
  _atom_site_fract_y
  _atom_site_fract_z
  _atom_site_U_iso_or_equiv
  _atom_site_adp_type
  _atom_site_occupancy
  _atom_site_site_symmetry_order
  _atom_site_calc_flag
  _atom_site_refinement_flags_posn
  _atom_site_refinement_flags_adp
  _atom_site_refinement_flags_occupancy
  _atom_site_disorder_assembly
  _atom_site_disorder_group
 S1 S 0.60499(4) 0.23615(5) 0.21564(5) 0.0579(4) Uani 1 1 d . U . . .
 N1 N 0.52519(14) 0.21873(15) 0.20134(14) 0.0444(6) Uani 1 1 d . U . . .
 N2 N 0.59887(13) 0.29381(17) 0.27478(17) 0.0527(7) Uani 1 1 d . U . . .
 C1 C 0.31284(12) 0.31284(12) 0.31284(12) 0.0211(6) Uani 1 3 d S TU P . .
 H1 H 0.283239 0.283238 0.283238 0.025 Uiso 1 3 calc RS T P . .
 C2 C 0.38917(12) 0.30398(12) 0.29788(12) 0.0229(5) Uani 1 1 d . U . . .
 C3 C 0.41630(13) 0.26071(12) 0.24996(13) 0.0266(5) Uani 1 1 d . U . . .
 H3 H 0.387894 0.233112 0.221598 0.032 Uiso 1 1 calc R . . . .
 C4 C 0.48905(14) 0.25884(14) 0.24443(15) 0.0331(5) Uani 1 1 d . U . . .
 C5 C 0.53114(14) 0.30191(17) 0.28669(17) 0.0393(5) Uani 1 1 d . U . . .
 C6 C 0.50166(14) 0.34648(17) 0.33542(17) 0.0390(6) Uani 1 1 d . U . . .
 H6 H 0.529216 0.375251 0.363446 0.047 Uiso 1 1 calc R . . . .
 C7 C 0.43153(13) 0.34652(14) 0.34062(14) 0.0306(5) Uani 1 1 d . U . . .
 C8 C 0.39009(14) 0.39009(14) 0.39009(14) 0.0352(8) Uani 1 3 d S TU P . .
 H8 H 0.419689 0.419689 0.419689 0.042 Uiso 1 3 calc RS T P . .
 C9 C 0.5111(4) 0.1061(4) 0.0950(4) 0.0522(16) Uani 0.5 1 d . U . . .
 S2 S 0.45673(7) 0.06330(7) 0.14405(6) 0.0734(4) Uani 1 1 d . U . . .
 C1A C 0.5423(4) -0.1644(4) 0.6023(4) 0.027(2) Uani 0.0833 1 d . U . A -1
 C2A C 0.5669(3) -0.1170(4) 0.6465(4) 0.029(2) Uani 0.0833 1 d G U . A -1
 C3A C 0.5203(4) -0.0772(5) 0.6891(3) 0.031(2) Uani 0.0833 1 d G U . A -1
 C4A C 0.4480(4) -0.0926(5) 0.6846(3) 0.033(2) Uani 0.0833 1 d G U . A -1
 C5A C 0.4262(4) -0.1443(4) 0.6394(4) 0.029(2) Uani 0.0833 1 d G U . A -1
 C6A C 0.4698(4) -0.1808(3) 0.5967(4) 0.0293(19) Uani 0.0833 1 d G U . A -1
 C7A C 0.5413(4) -0.0093(5) 0.6930(3) 0.032(2) Uani 0.0833 1 d G U . A -1
 C8A C 0.4968(5) 0.0443(5) 0.6931(3) 0.033(2) Uani 0.0833 1 d G U . A -1
 C9A C 0.4230(4) 0.0305(5) 0.6877(3) 0.033(2) Uani 0.0833 1 d G U . A -1
 C10A C 0.4006(4) -0.0375(5) 0.6846(3) 0.034(2) Uani 0.0833 1 d G U . A -1
 C11A C 0.3462(3) -0.0543(5) 0.6374(4) 0.033(2) Uani 0.0833 1 d G U . A -1
 C12A C 0.3603(3) -0.1191(4) 0.6094(4) 0.032(2) Uani 0.0833 1 d G U . A -1
 C13A C 0.4540(4) -0.1933(3) 0.5255(5) 0.028(2) Uani 0.0833 1 d G U . A -1
 C14A C 0.3941(4) -0.1707(3) 0.4981(4) 0.030(2) Uani 0.0833 1 d G U . A -1
 C15A C 0.3457(3) -0.1334(4) 0.5399(4) 0.031(2) Uani 0.0833 1 d G U . A -1
 C16A C 0.3168(3) -0.0806(5) 0.4963(4) 0.0294(19) Uani 0.0833 1 d G U . A -1
 C17A C 0.3018(2) -0.0182(5) 0.5246(4) 0.031(2) Uani 0.0833 1 d G U . A -1
 C18A C 0.3162(3) -0.0021(5) 0.5948(4) 0.032(2) Uani 0.0833 1 d G U . A -1
 C19A C 0.3423(4) 0.0676(4) 0.5989(4) 0.033(2) Uani 0.0833 1 d G U . A -1
 C20A C 0.3951(4) 0.0836(4) 0.6446(4) 0.033(2) Uani 0.0833 1 d G U . A -1
 C21A C 0.6044(4) -0.0038(5) 0.6542(3) 0.028(2) Uani 0.0833 1 d G U . A -1
 C22A C 0.6210(4) 0.0578(5) 0.6181(4) 0.031(2) Uani 0.0833 1 d G U . A -1
 C23A C 0.6662(3) 0.0507(4) 0.5617(4) 0.030(2) Uani 0.0833 1 d G U . A -1
 C24A C 0.6825(2) -0.0151(4) 0.5340(4) 0.030(2) Uani 0.0833 1 d G U . A -1
 C25A C 0.6531(3) -0.0756(4) 0.5617(4) 0.028(2) Uani 0.0833 1 d G U . A -1
 C26A C 0.6278(3) -0.1280(3) 0.5140(5) 0.026(2) Uani 0.0833 1 d G U . A -1
 C27A C 0.5736(4) -0.1709(3) 0.5336(5) 0.027(2) Uani 0.0833 1 d G U . A -1
 C28A C 0.6931(3) -0.0075(4) 0.4610(5) 0.030(2) Uani 0.0833 1 d G U . A -1
 C29A C 0.6199(3) -0.0698(5) 0.6252(4) 0.030(2) Uani 0.0833 1 d G U . A -1
 C30A C 0.5183(4) -0.1892(3) 0.4871(5) 0.028(2) Uani 0.0833 1 d G U . A -1
 C31A C 0.5188(5) -0.1644(3) 0.4190(4) 0.027(2) Uani 0.0833 1 d G U . A -1
 C32A C 0.5803(4) -0.1346(3) 0.3954(4) 0.027(2) Uani 0.0833 1 d G U . A -1
 C33A C 0.6348(4) -0.1177(3) 0.4416(5) 0.029(2) Uani 0.0833 1 d G U . A -1
 C34A C 0.6686(3) -0.0576(4) 0.4160(4) 0.030(2) Uani 0.0833 1 d G U . A -1
 C35A C 0.6371(4) -0.0368(4) 0.3523(4) 0.029(2) Uani 0.0833 1 d G U . A -1
 C36A C 0.5836(4) -0.0851(4) 0.3404(4) 0.031(2) Uani 0.0833 1 d G U . A -1
 C37A C 0.6302(4) 0.0318(4) 0.3364(4) 0.032(2) Uani 0.0833 1 d G U . A -1
 C38A C 0.6543(3) 0.0841(4) 0.3823(4) 0.031(2) Uani 0.0833 1 d G U . A -1
 C39A C 0.6863(3) 0.0639(4) 0.4437(5) 0.033(2) Uani 0.0833 1 d G U . A -1
 C40A C 0.6685(3) 0.1001(4) 0.5052(5) 0.032(2) Uani 0.0833 1 d G U . A -1
 C41A C 0.6241(4) 0.1535(3) 0.5055(5) 0.033(2) Uani 0.0833 1 d G U . A -1
 C42A C 0.5910(4) 0.1726(3) 0.4426(5) 0.033(2) Uani 0.0833 1 d G U . A -1
 C43A C 0.6069(4) 0.1397(3) 0.3822(4) 0.034(2) Uani 0.0833 1 d G U . A -1
 C44A C 0.5534(4) 0.1216(4) 0.3336(4) 0.033(2) Uani 0.0833 1 d G U . A -1
 C45A C 0.4835(4) 0.1400(4) 0.3512(4) 0.033(2) Uani 0.0833 1 d G U . A -1
 C46A C 0.4315(4) 0.0927(5) 0.3382(3) 0.032(2) Uani 0.0833 1 d G U . A -1
 C47A C 0.4434(4) 0.0287(5) 0.3112(3) 0.031(2) Uani 0.0833 1 d G U . A -1
 C48A C 0.5147(4) 0.0091(5) 0.2948(3) 0.032(2) Uani 0.0833 1 d G U . A -1
 C49A C 0.5663(4) 0.0558(4) 0.3057(3) 0.0329(19) Uani 0.0833 1 d G U . A -1
 C50A C 0.5211(5) -0.0608(4) 0.3118(3) 0.030(2) Uani 0.0833 1 d G U . A -1
 C51A C 0.4570(5) -0.0890(4) 0.3383(3) 0.030(2) Uani 0.0833 1 d G U . A -1
 C52A C 0.4100(4) -0.0316(5) 0.3376(3) 0.030(2) Uani 0.0833 1 d G U . A -1
 C53A C 0.4525(5) -0.1399(4) 0.3887(4) 0.028(2) Uani 0.0833 1 d G U . A -1
 C54A C 0.3939(4) -0.1408(4) 0.4284(4) 0.030(2) Uani 0.0833 1 d G U . A -1
 C55A C 0.3479(3) -0.0852(4) 0.4276(4) 0.029(2) Uani 0.0833 1 d G U . A -1
 C56A C 0.3570(3) -0.0273(5) 0.3882(3) 0.028(2) Uani 0.0833 1 d G U . A -1
 C57A C 0.3419(3) 0.0403(5) 0.4177(4) 0.029(2) Uani 0.0833 1 d G U . A -1
 C58A C 0.3787(3) 0.0981(4) 0.3936(4) 0.029(2) Uani 0.0833 1 d G U . A -1
 C59A C 0.4042(4) 0.1491(4) 0.4394(4) 0.029(2) Uani 0.0833 1 d G U . A -1
 C60A C 0.4692(4) 0.1750(3) 0.4127(5) 0.032(2) Uani 0.0833 1 d G U . A -1
 C61A C 0.5213(4) 0.1914(3) 0.4595(5) 0.032(2) Uani 0.0833 1 d G U . A -1
 C62A C 0.5102(5) 0.1837(3) 0.5326(5) 0.032(2) Uani 0.0833 1 d G U . A -1
 C63A C 0.5739(4) 0.1136(4) 0.6180(4) 0.031(2) Uani 0.0833 1 d G U . A -1
 C64A C 0.4465(4) 0.1622(3) 0.5598(4) 0.030(2) Uani 0.0833 1 d G U . A -1
 C65A C 0.3898(4) 0.1448(3) 0.5101(4) 0.030(2) Uani 0.0833 1 d G U . A -1
 C66A C 0.3180(3) 0.0438(5) 0.4849(4) 0.0292(19) Uani 0.0833 1 d G U . A -1
 C67A C 0.3399(3) 0.0950(4) 0.5315(4) 0.030(2) Uani 0.0833 1 d G U . A -1
 C68A C 0.4483(5) 0.1291(4) 0.6220(4) 0.032(2) Uani 0.0833 1 d G U . A -1
 C69A C 0.5103(5) 0.1057(4) 0.6524(3) 0.032(2) Uani 0.0833 1 d G U . A -1
 C70A C 0.5738(4) 0.1596(3) 0.5617(4) 0.033(2) Uani 0.0833 1 d G U . A -1
 C1B C 0.4928(8) -0.1963(3) 0.5161(7) 0.026(2) Uani 0.0833 1 d . U . B -2
 C2B C 0.5334(5) -0.1827(4) 0.5708(8) 0.025(2) Uani 0.0833 1 d G U . B -2
 C3B C 0.5041(4) -0.1554(6) 0.6338(6) 0.026(2) Uani 0.0833 1 d G U . B -2
 C4B C 0.4306(4) -0.1466(5) 0.6364(4) 0.027(2) Uani 0.0833 1 d G U . B -2
 C5B C 0.3914(5) -0.1641(4) 0.5786(5) 0.028(2) Uani 0.0833 1 d G U . B -2
 C6B C 0.4189(7) -0.1878(4) 0.5175(5) 0.025(2) Uani 0.0833 1 d G U . B -2
 C7B C 0.5463(5) -0.1053(8) 0.6614(6) 0.026(2) Uani 0.0833 1 d G U . B -2
 C8B C 0.5218(8) -0.0476(8) 0.6920(4) 0.028(2) Uani 0.0833 1 d G U . B -2
 C9B C 0.4474(8) -0.0367(6) 0.6948(3) 0.029(2) Uani 0.0833 1 d G U . B -2
 C10B C 0.4039(6) -0.0867(5) 0.6678(4) 0.029(2) Uani 0.0833 1 d G U . B -2
 C11B C 0.3452(5) -0.0648(5) 0.6286(6) 0.030(2) Uani 0.0833 1 d G U . B -2
 C12B C 0.3362(4) -0.1111(6) 0.5743(6) 0.027(2) Uani 0.0833 1 d G U . B -2
 C13B C 0.3971(9) -0.1619(6) 0.4517(5) 0.027(2) Uani 0.0833 1 d G U . B -2
 C14B C 0.3467(7) -0.1140(8) 0.4476(6) 0.026(2) Uani 0.0833 1 d G U . B -2
 C15B C 0.3149(4) -0.0878(8) 0.5091(7) 0.027(2) Uani 0.0833 1 d G U . B -2
 C16B C 0.3031(3) -0.0155(9) 0.4974(9) 0.027(2) Uani 0.0833 1 d G U . B -2
 C17B C 0.3105(4) 0.0289(7) 0.5512(10) 0.0294(19) Uani 0.0833 1 d G U . B -2
 C18B C 0.3321(6) 0.0070(6) 0.6178(8) 0.032(2) Uani 0.0833 1 d G U . B -2
 C19B C 0.3798(9) 0.0571(5) 0.6457(8) 0.030(2) Uani 0.0833 1 d G U . B -2
 C20B C 0.4367(10) 0.0356(6) 0.6834(5) 0.029(2) Uani 0.0833 1 d G U . B -2
 C21B C 0.6061(4) -0.1004(8) 0.6178(8) 0.024(2) Uani 0.0833 1 d G U . B -2
 C22B C 0.6406(5) -0.0365(9) 0.6081(8) 0.023(2) Uani 0.0833 1 d G U . B -2
 C23B C 0.6786(3) -0.0295(9) 0.5467(9) 0.024(2) Uani 0.0833 1 d G U . B -2
 C24B C 0.6714(4) -0.0773(7) 0.4917(10) 0.0244(19) Uani 0.0833 1 d G U . B -2
 C25B C 0.6249(6) -0.1331(6) 0.4966(10) 0.025(2) Uani 0.0833 1 d G U . B -2
 C26B C 0.5820(9) -0.1491(4) 0.4370(9) 0.025(2) Uani 0.0833 1 d G U . B -2
 C27B C 0.5176(10) -0.1795(3) 0.4465(7) 0.024(2) Uani 0.0833 1 d G U . B -2
 C28B C 0.6809(5) -0.0409(6) 0.4279(10) 0.025(2) Uani 0.0833 1 d G U . B -2
 C29B C 0.5980(5) -0.1477(6) 0.5618(9) 0.024(2) Uani 0.0833 1 d G U . B -2
 C30B C 0.4575(10) -0.1589(6) 0.4074(5) 0.025(2) Uani 0.0833 1 d G U . B -2
 C31B C 0.4634(11) -0.1072(7) 0.3569(4) 0.024(2) Uani 0.0833 1 d G U . B -2
 C32B C 0.5303(11) -0.0882(6) 0.3371(5) 0.026(2) Uani 0.0833 1 d G U . B -2
 C33B C 0.5891(10) -0.1096(4) 0.3754(8) 0.024(2) Uani 0.0833 1 d G U . B -2
 C34B C 0.6395(8) -0.0564(5) 0.3715(8) 0.026(2) Uani 0.0833 1 d G U . B -2
 C35B C 0.6141(8) -0.0013(5) 0.3290(6) 0.027(2) Uani 0.0833 1 d G U . B -2
 C36B C 0.5473(10) -0.0223(6) 0.3080(4) 0.027(2) Uani 0.0833 1 d G U . B -2
 C37B C 0.6294(6) 0.0660(5) 0.3445(5) 0.029(2) Uani 0.0833 1 d G U . B -2
 C38B C 0.6711(4) 0.0831(6) 0.4027(7) 0.028(2) Uani 0.0833 1 d G U . B -2
 C39B C 0.6972(3) 0.0294(7) 0.4432(9) 0.026(2) Uani 0.0833 1 d G U . B -2
 C40B C 0.6947(3) 0.0373(9) 0.5163(9) 0.0261(19) Uani 0.0833 1 d G U . B -2
 C41B C 0.6701(6) 0.0947(8) 0.5467(7) 0.029(2) Uani 0.0833 1 d G U . B -2
 C42B C 0.6427(7) 0.1484(6) 0.5047(5) 0.031(2) Uani 0.0833 1 d G U . B -2
 C43B C 0.6444(5) 0.1434(5) 0.4342(5) 0.030(2) Uani 0.0834 1 d G U . B -2
 C44B C 0.5861(5) 0.1646(4) 0.3932(5) 0.030(2) Uani 0.0834 1 d G U . B -2
 C45B C 0.5268(6) 0.1916(3) 0.4292(7) 0.030(2) Uani 0.0834 1 d G U . B -2
 C46B C 0.4618(5) 0.1716(5) 0.4074(8) 0.030(2) Uani 0.0834 1 d G U . B -2
 C47B C 0.4510(5) 0.1261(7) 0.3547(7) 0.028(2) Uani 0.0833 1 d G U . B -2
 C48B C 0.5112(6) 0.0972(7) 0.3190(4) 0.029(2) Uani 0.0833 1 d G U . B -2
 C49B C 0.5757(5) 0.1178(5) 0.3387(4) 0.030(2) Uani 0.0833 1 d G U . B -2
 C50B C 0.4951(8) 0.0284(8) 0.3039(3) 0.028(2) Uani 0.0833 1 d G U . B -2
 C51B C 0.4265(8) 0.0102(9) 0.3275(5) 0.025(2) Uani 0.0833 1 d G U . B -2
 C52B C 0.4007(5) 0.0722(9) 0.3592(7) 0.026(2) Uani 0.0833 1 d G U . B -2
 C53B C 0.4076(9) -0.0545(9) 0.3522(4) 0.025(2) Uani 0.0833 1 d G U . B -2
 C54B C 0.3535(7) -0.0572(9) 0.3977(6) 0.025(2) Uani 0.0833 1 d G U . B -2
 C55B C 0.3282(4) 0.0031(9) 0.4285(9) 0.026(2) Uani 0.0833 1 d G U . B -2
 C56B C 0.3543(3) 0.0676(9) 0.4158(9) 0.026(2) Uani 0.0833 1 d G U . B -2
 C57B C 0.3632(5) 0.1158(7) 0.4729(10) 0.027(2) Uani 0.0833 1 d G U . B -2
 C58B C 0.4159(6) 0.1657(5) 0.4686(10) 0.029(2) Uani 0.0834 1 d G U . B -2
 C59B C 0.4584(9) 0.1812(3) 0.5259(8) 0.030(2) Uani 0.0834 1 d G U . B -2
 C60B C 0.5272(9) 0.1975(3) 0.5011(7) 0.032(2) Uani 0.0834 1 d G U . B -2
 C61B C 0.5837(9) 0.1759(5) 0.5402(5) 0.031(2) Uani 0.0833 1 d G U . B -2
 C62B C 0.5736(10) 0.1394(7) 0.6042(4) 0.030(2) Uani 0.0833 1 d G U . B -2
 C63B C 0.6143(8) 0.0239(9) 0.6397(5) 0.025(2) Uani 0.0833 1 d G U . B -2
 C64B C 0.5075(11) 0.1265(6) 0.6311(5) 0.028(2) Uani 0.0833 1 d G U . B -2
 C65B C 0.4463(10) 0.1497(4) 0.5898(8) 0.029(2) Uani 0.0833 1 d G U . B -2
 C66B C 0.3445(6) 0.0950(6) 0.5385(10) 0.029(2) Uani 0.0833 1 d G U . B -2
 C67B C 0.3838(9) 0.1114(5) 0.5973(9) 0.030(2) Uani 0.0833 1 d G U . B -2
 C68B C 0.5009(11) 0.0698(7) 0.6725(4) 0.028(2) Uani 0.0833 1 d G U . B -2
 C69B C 0.5530(9) 0.0192(8) 0.6786(3) 0.026(2) Uani 0.0833 1 d G U . B -2
 C70B C 0.6269(9) 0.0885(9) 0.6086(5) 0.026(2) Uani 0.0833 1 d G U . B -2

loop_
  _atom_site_aniso_label
  _atom_site_aniso_U_11
  _atom_site_aniso_U_22
  _atom_site_aniso_U_33
  _atom_site_aniso_U_23
  _atom_site_aniso_U_13
  _atom_site_aniso_U_12
 S1 0.0344(4) 0.0729(6) 0.0665(6) 0.0501(5) 0.0278(4) 0.0285(4)
 N1 0.0398(12) 0.0469(13) 0.0465(13) 0.0291(9) 0.0245(9) 0.0227(10)
 N2 0.0235(10) 0.0706(17) 0.0639(17) 0.0446(12) 0.0095(9) 0.0096(9)
 C1 0.0211(6) 0.0211(6) 0.0211(6) 0.0022(7) 0.0022(7) 0.0022(7)
 C2 0.0214(9) 0.0230(10) 0.0245(10) 0.0070(8) 0.0026(8) 0.0026(8)
 C3 0.0278(10) 0.0250(11) 0.0269(11) 0.0105(8) 0.0082(8) 0.0076(8)
 C4 0.0290(9) 0.0346(12) 0.0357(12) 0.0221(9) 0.0132(9) 0.0131(9)
 C5 0.0220(10) 0.0481(15) 0.0477(14) 0.0304(9) 0.0049(9) 0.0055(9)
 C6 0.0246(10) 0.0464(15) 0.0462(15) 0.0158(10) -0.0050(9) -0.0045(10)
 C7 0.0247(10) 0.0332(12) 0.0338(12) 0.0064(9) -0.0029(9) -0.0024(9)
 C8 0.0352(8) 0.0352(8) 0.0352(8) -0.0052(8) -0.0052(8) -0.0052(8)
 C9 0.062(4) 0.049(4) 0.045(3) 0.008(3) -0.010(3) 0.003(3)
 S2 0.0755(7) 0.0905(9) 0.0542(6) 0.0160(5) -0.0224(5) -0.0268(6)
 C1A 0.029(4) 0.021(5) 0.031(4) 0.013(4) -0.004(3) 0.004(4)
 C2A 0.032(4) 0.028(4) 0.027(4) 0.012(4) -0.010(4) 0.002(4)
 C3A 0.036(4) 0.034(4) 0.023(5) 0.008(4) -0.008(4) -0.001(3)
 C4A 0.038(4) 0.038(4) 0.022(5) 0.010(4) 0.002(3) -0.003(3)
 C5A 0.031(4) 0.029(4) 0.026(4) 0.014(4) 0.006(3) -0.010(3)
 C6A 0.032(4) 0.021(5) 0.035(4) 0.012(4) 0.000(3) -0.005(3)
 C7A 0.036(4) 0.037(4) 0.023(6) 0.001(4) -0.010(4) 0.001(3)
 C8A 0.038(4) 0.037(4) 0.023(5) -0.009(4) -0.002(4) 0.003(3)
 C9A 0.035(4) 0.042(4) 0.023(5) -0.008(4) 0.006(4) 0.003(3)
 C10A 0.034(4) 0.045(4) 0.024(5) 0.002(3) 0.009(4) 0.000(3)
 C11A 0.022(4) 0.044(4) 0.031(4) 0.003(3) 0.012(4) -0.005(3)
 C12A 0.025(4) 0.036(4) 0.035(4) 0.009(3) 0.007(3) -0.009(3)
 C13A 0.032(4) 0.015(5) 0.038(4) 0.001(4) 0.000(3) -0.005(4)
 C14A 0.028(4) 0.020(5) 0.042(4) -0.003(4) -0.005(3) -0.007(4)
 C15A 0.021(5) 0.032(4) 0.040(4) 0.003(3) -0.001(3) -0.010(4)
 C16A 0.014(5) 0.037(4) 0.037(4) -0.002(3) -0.002(3) -0.003(4)
 C17A 0.014(5) 0.041(4) 0.038(4) -0.004(3) 0.003(4) 0.004(3)
 C18A 0.019(5) 0.043(4) 0.034(4) -0.002(3) 0.010(4) 0.003(4)
 C19A 0.025(4) 0.039(4) 0.035(4) -0.007(3) 0.007(4) 0.010(4)
 C20A 0.032(4) 0.036(4) 0.031(4) -0.011(4) 0.007(4) 0.009(4)
 C21A 0.025(4) 0.033(4) 0.027(5) 0.000(4) -0.013(4) 0.000(3)
 C22A 0.026(5) 0.031(4) 0.034(5) -0.005(4) -0.011(4) -0.003(4)
 C23A 0.018(5) 0.030(3) 0.042(4) 0.001(3) -0.009(4) -0.004(4)
 C24A 0.014(5) 0.032(4) 0.043(4) 0.002(3) -0.005(4) 0.001(4)
 C25A 0.018(5) 0.028(4) 0.037(4) 0.005(3) -0.007(4) 0.008(4)
 C26A 0.020(4) 0.021(4) 0.037(4) 0.004(4) 0.000(3) 0.009(4)
 C27A 0.026(4) 0.017(5) 0.037(4) 0.006(4) -0.001(3) 0.009(4)
 C28A 0.011(5) 0.035(4) 0.045(4) 0.005(3) 0.004(4) 0.004(3)
 C29A 0.027(5) 0.032(4) 0.030(5) 0.005(4) -0.012(4) 0.003(4)
 C30A 0.031(4) 0.016(5) 0.036(4) 0.001(4) -0.002(3) 0.003(4)
 C31A 0.032(4) 0.018(5) 0.032(4) -0.006(4) 0.001(3) 0.007(4)
 C32A 0.028(4) 0.021(5) 0.033(4) -0.002(4) 0.005(4) 0.011(4)
 C33A 0.025(4) 0.026(4) 0.036(4) 0.000(3) 0.005(4) 0.011(4)
 C34A 0.019(5) 0.034(4) 0.037(4) 0.003(3) 0.010(4) 0.008(4)
 C35A 0.023(4) 0.032(4) 0.031(5) 0.000(3) 0.016(4) 0.010(4)
 C36A 0.031(4) 0.032(4) 0.028(4) -0.004(4) 0.008(4) 0.011(3)
 C37A 0.025(4) 0.038(4) 0.032(5) 0.006(4) 0.016(4) 0.006(3)
 C38A 0.021(5) 0.031(4) 0.042(4) 0.010(4) 0.015(4) -0.004(4)
 C39A 0.013(5) 0.036(4) 0.048(4) 0.006(3) 0.006(4) -0.005(4)
 C40A 0.019(5) 0.030(4) 0.048(4) 0.003(3) -0.005(4) -0.007(4)
 C41A 0.025(4) 0.023(4) 0.051(4) 0.001(4) -0.006(3) -0.006(4)
 C42A 0.030(4) 0.020(5) 0.050(4) 0.006(4) 0.003(3) -0.001(4)
 C43A 0.031(4) 0.027(4) 0.044(4) 0.012(4) 0.011(3) -0.002(4)
 C44A 0.038(4) 0.029(4) 0.033(5) 0.014(4) 0.009(3) 0.006(3)
 C45A 0.036(4) 0.029(5) 0.033(4) 0.012(4) 0.002(3) 0.013(3)
 C46A 0.033(4) 0.034(4) 0.030(5) 0.008(4) -0.005(4) 0.014(3)
 C47A 0.031(4) 0.039(4) 0.022(5) 0.004(4) -0.004(4) 0.012(3)
 C48A 0.037(4) 0.040(4) 0.021(6) 0.000(4) 0.001(4) 0.010(3)
 C49A 0.034(4) 0.038(4) 0.027(4) 0.008(4) 0.010(3) 0.009(3)
 C50A 0.035(4) 0.034(4) 0.022(5) -0.005(4) 0.000(4) 0.012(3)
 C51A 0.032(4) 0.031(4) 0.026(5) -0.009(4) -0.005(4) 0.008(3)
 C52A 0.028(4) 0.036(4) 0.025(5) -0.003(4) -0.010(4) 0.008(4)
 C53A 0.030(4) 0.023(5) 0.032(5) -0.009(4) -0.008(3) 0.003(4)
 C54A 0.028(4) 0.025(5) 0.037(4) -0.008(4) -0.006(3) 0.000(4)
 C55A 0.022(5) 0.034(4) 0.031(4) -0.007(3) -0.009(4) 0.000(4)
 C56A 0.021(5) 0.035(4) 0.028(4) -0.003(3) -0.008(4) 0.006(4)
 C57A 0.020(5) 0.036(4) 0.031(4) 0.000(4) -0.009(4) 0.010(4)
 C58A 0.025(4) 0.030(4) 0.031(4) 0.006(4) -0.005(4) 0.016(3)
 C59A 0.025(4) 0.024(5) 0.036(4) 0.007(4) -0.002(3) 0.015(4)
 C60A 0.033(4) 0.023(5) 0.040(4) 0.008(4) -0.001(3) 0.013(3)
 C61A 0.031(4) 0.017(5) 0.046(4) 0.004(4) 0.001(3) 0.006(4)
 C62A 0.035(4) 0.018(5) 0.043(4) -0.008(4) -0.002(3) 0.004(4)
 C63A 0.032(4) 0.022(5) 0.039(5) -0.010(4) -0.008(4) -0.004(4)
 C64A 0.032(4) 0.022(5) 0.037(4) -0.010(4) 0.002(3) 0.010(4)
 C65A 0.026(4) 0.027(5) 0.039(4) -0.004(4) 0.001(3) 0.014(4)
 C66A 0.015(5) 0.037(4) 0.036(3) -0.002(3) 0.000(3) 0.010(4)
 C67A 0.019(4) 0.034(4) 0.036(4) -0.004(3) 0.007(3) 0.013(4)
 C68A 0.035(4) 0.026(5) 0.033(4) -0.013(4) 0.001(4) 0.008(4)
 C69A 0.037(4) 0.027(5) 0.033(5) -0.012(4) -0.005(4) 0.001(3)
 C70A 0.032(4) 0.023(5) 0.045(4) -0.006(4) -0.007(3) -0.003(4)
 C1B 0.031(4) 0.013(5) 0.035(4) 0.003(3) -0.001(3) 0.000(4)
 C2B 0.028(4) 0.015(5) 0.032(4) 0.011(4) -0.001(3) 0.003(4)
 C3B 0.030(3) 0.023(4) 0.026(4) 0.015(4) -0.002(3) -0.002(3)
 C4B 0.029(4) 0.027(4) 0.024(4) 0.013(4) 0.005(3) -0.008(3)
 C5B 0.026(4) 0.025(4) 0.033(4) 0.006(3) 0.003(3) -0.011(4)
 C6B 0.028(4) 0.013(5) 0.034(4) 0.002(4) -0.001(3) -0.010(4)
 C7B 0.029(4) 0.027(4) 0.022(5) 0.013(4) -0.006(4) -0.001(3)
 C8B 0.031(4) 0.034(4) 0.018(5) 0.007(4) -0.004(4) -0.004(3)
 C9B 0.031(4) 0.037(4) 0.019(5) 0.003(3) 0.007(4) -0.006(3)
 C10B 0.028(4) 0.037(4) 0.021(4) 0.007(3) 0.009(4) -0.007(3)
 C11B 0.022(4) 0.040(4) 0.028(4) 0.003(3) 0.011(4) -0.004(3)
 C12B 0.016(4) 0.035(4) 0.031(4) 0.006(3) 0.007(3) -0.011(4)
 C13B 0.028(4) 0.020(5) 0.032(4) -0.004(4) -0.004(3) -0.006(4)
 C14B 0.019(4) 0.030(4) 0.029(4) -0.003(4) -0.005(4) -0.007(4)
 C15B 0.013(5) 0.035(4) 0.034(4) 0.002(3) 0.003(3) -0.008(4)
 C16B 0.009(5) 0.038(4) 0.034(4) 0.001(3) 0.001(4) 0.002(3)
 C17B 0.014(5) 0.039(4) 0.035(4) -0.002(3) 0.006(3) 0.007(3)
 C18B 0.021(5) 0.044(4) 0.030(4) -0.004(3) 0.010(4) 0.004(3)
 C19B 0.027(4) 0.037(4) 0.026(4) -0.011(4) 0.011(4) 0.007(4)
 C20B 0.031(4) 0.037(4) 0.020(5) -0.008(4) 0.008(4) 0.000(3)
 C21B 0.021(4) 0.023(4) 0.028(4) 0.015(4) -0.009(4) 0.004(3)
 C22B 0.015(5) 0.028(4) 0.027(4) 0.007(4) -0.011(4) 0.001(3)
 C23B 0.010(5) 0.028(4) 0.035(4) 0.009(3) -0.004(4) 0.002(4)
 C24B 0.013(4) 0.023(4) 0.036(4) 0.008(3) 0.005(3) 0.007(3)
 C25B 0.021(4) 0.016(4) 0.036(4) 0.007(4) 0.003(3) 0.008(4)
 C26B 0.027(4) 0.016(5) 0.032(4) -0.001(4) 0.004(4) 0.009(4)
 C27B 0.031(4) 0.011(5) 0.030(4) -0.001(4) 0.002(3) 0.004(4)
 C28B 0.011(5) 0.026(4) 0.037(4) 0.004(3) 0.011(4) 0.006(4)
 C29B 0.023(4) 0.015(5) 0.033(4) 0.013(4) -0.002(3) 0.006(4)
 C30B 0.031(4) 0.017(5) 0.027(4) -0.007(4) 0.000(3) 0.000(4)
 C31B 0.028(4) 0.023(4) 0.020(5) -0.007(4) -0.004(4) 0.004(3)
 C32B 0.031(4) 0.026(4) 0.021(5) -0.004(4) 0.004(4) 0.006(3)
 C33B 0.024(4) 0.020(4) 0.027(4) -0.005(4) 0.010(4) 0.009(4)
 C34B 0.020(4) 0.029(4) 0.029(4) 0.002(4) 0.013(4) 0.012(4)
 C35B 0.024(4) 0.032(4) 0.025(5) 0.007(4) 0.017(4) 0.008(3)
 C36B 0.030(4) 0.033(4) 0.017(5) 0.000(4) 0.007(3) 0.008(3)
 C37B 0.023(4) 0.032(4) 0.032(5) 0.013(3) 0.015(4) 0.002(3)
 C38B 0.012(5) 0.029(4) 0.042(4) 0.015(3) 0.013(4) -0.002(4)
 C39B 0.006(5) 0.029(4) 0.043(4) 0.011(3) 0.012(4) 0.001(3)
 C40B 0.007(5) 0.031(4) 0.040(4) 0.005(3) -0.003(4) -0.005(3)
 C41B 0.019(5) 0.027(4) 0.041(4) 0.003(3) -0.005(4) -0.011(4)
 C42B 0.025(4) 0.024(4) 0.045(4) 0.006(4) -0.001(3) -0.009(4)
 C43B 0.022(4) 0.023(4) 0.046(4) 0.012(3) 0.004(3) -0.004(4)
 C44B 0.029(4) 0.019(5) 0.042(4) 0.016(4) 0.005(3) 0.001(4)
 C45B 0.030(4) 0.016(5) 0.042(4) 0.009(4) -0.001(3) 0.005(3)
 C46B 0.029(4) 0.022(5) 0.037(4) 0.009(4) -0.001(3) 0.010(4)
 C47B 0.027(4) 0.028(4) 0.030(4) 0.012(4) -0.003(4) 0.008(3)
 C48B 0.030(4) 0.030(4) 0.027(5) 0.013(4) 0.004(3) 0.007(3)
 C49B 0.030(4) 0.028(4) 0.032(5) 0.015(4) 0.007(3) 0.005(3)
 C50B 0.031(4) 0.035(4) 0.020(5) 0.009(4) 0.001(4) 0.007(3)
 C51B 0.025(4) 0.033(4) 0.017(5) 0.007(4) -0.006(4) 0.007(3)
 C52B 0.022(4) 0.032(4) 0.024(5) 0.009(4) -0.006(4) 0.008(3)
 C53B 0.025(4) 0.033(4) 0.019(5) 0.000(4) -0.007(4) 0.002(4)
 C54B 0.018(5) 0.033(4) 0.024(4) 0.000(3) -0.007(4) -0.001(4)
 C55B 0.013(5) 0.036(4) 0.029(4) 0.003(3) -0.006(4) 0.003(4)
 C56B 0.016(5) 0.031(4) 0.030(4) 0.006(4) -0.005(4) 0.010(4)
 C57B 0.018(4) 0.029(4) 0.035(4) 0.002(3) -0.001(3) 0.013(4)
 C58B 0.025(4) 0.022(5) 0.041(4) 0.002(4) 0.000(3) 0.013(4)
 C59B 0.032(4) 0.019(5) 0.040(4) -0.006(4) 0.001(3) 0.009(4)
 C60B 0.034(4) 0.018(5) 0.044(4) -0.001(4) -0.001(3) 0.001(4)
 C61B 0.032(4) 0.019(5) 0.041(4) -0.001(4) -0.004(3) -0.007(4)
 C62B 0.032(4) 0.021(5) 0.036(5) -0.006(4) -0.003(3) -0.007(4)
 C63B 0.022(5) 0.030(4) 0.023(5) 0.000(4) -0.010(4) -0.006(4)
 C64B 0.034(4) 0.022(5) 0.029(5) -0.011(4) 0.000(3) 0.000(4)
 C65B 0.033(4) 0.021(5) 0.033(4) -0.013(4) 0.004(4) 0.007(4)
 C66B 0.018(4) 0.032(4) 0.037(4) -0.006(3) 0.005(4) 0.013(4)
 C67B 0.027(4) 0.032(4) 0.031(4) -0.011(4) 0.008(4) 0.011(4)
 C68B 0.034(4) 0.028(4) 0.021(6) -0.010(4) 0.002(4) -0.004(3)
 C69B 0.028(4) 0.031(4) 0.019(5) -0.001(4) -0.005(4) -0.006(3)
 C70B 0.023(4) 0.025(4) 0.031(4) -0.003(4) -0.008(4) -0.010(4)

_geom_special_details
;
 All esds (except the esd in the dihedral angle between two l.s. planes)
 are estimated using the full covariance matrix.  The cell esds are taken
 into account individually in the estimation of esds in distances, angles
 and torsion angles; correlations between esds in cell parameters are only
 used when they are defined by crystal symmetry.  An approximate (isotropic)
 treatment of cell esds is used for estimating esds involving l.s. planes.
;
loop_
  _geom_bond_atom_site_label_1
  _geom_bond_atom_site_label_2
  _geom_bond_distance
  _geom_bond_site_symmetry_2
  _geom_bond_publ_flag
 S1 N1 1.617(3) . ?
 S1 N2 1.615(4) . ?
 N1 C4 1.347(4) . ?
 N2 C5 1.351(4) . ?
 C1 H1 1.0000 . ?
 C1 C2 1.527(3) 9 ?
 C1 C2 1.527(3) 5 ?
 C1 C2 1.527(3) . ?
 C2 C3 1.366(3) . ?
 C2 C7 1.437(4) . ?
 C3 H3 0.9500 . ?
 C3 C4 1.424(4) . ?
 C4 C5 1.435(5) . ?
 C5 C6 1.410(5) . ?
 C6 H6 0.9500 . ?
 C6 C7 1.372(4) . ?
 C7 C8 1.519(3) . ?
 C8 H8 1.0000 . ?
 C9 S2 1.654(8) . ?
 C9 S2 1.614(8) 24_656 ?
 C1A C2A 1.3527 . ?
 C1A C6A 1.4529 . ?
 C1A C27A 1.4784 . ?
 C2A C3A 1.4567 . ?
 C2A C29A 1.4432 . ?
 C3A C4A 1.4444 . ?
 C3A C7A 1.3882 . ?
 C4A C5A 1.4053 . ?
 C4A C10A 1.4179 . ?
 C5A C6A 1.3865 . ?
 C5A C12A 1.4953 . ?
 C6A C13A 1.4438 . ?
 C7A C8A 1.3586 . ?
 C7A C21A 1.4474 . ?
 C8A C9A 1.4673 . ?
 C8A C69A 1.4612 . ?
 C9A C10A 1.3971 . ?
 C9A C20A 1.4411 . ?
 C10A C11A 1.4417 . ?
 C11A C12A 1.4046 . ?
 C11A C18A 1.4396 . ?
 C12A C15A 1.4133 . ?
 C13A C14A 1.3577 . ?
 C13A C30A 1.4626 . ?
 C14A C15A 1.4440 . ?
 C14A C54A 1.4796 . ?
 C15A C16A 1.4485 . ?
 C16A C17A 1.3677 . ?
 C16A C55A 1.4746 . ?
 C17A C18A 1.4319 . ?
 C17A C66A 1.4708 . ?
 C18A C19A 1.4536 . ?
 C19A C20A 1.3962 . ?
 C19A C67A 1.4205 . ?
 C20A C68A 1.4348 . ?
 C21A C22A 1.4302 . ?
 C21A C29A 1.4387 . ?
 C22A C23A 1.4163 . ?
 C22A C63A 1.4243 . ?
 C23A C24A 1.4285 . ?
 C23A C40A 1.4645 . ?
 C24A C25A 1.4177 . ?
 C24A C28A 1.4455 . ?
 C25A C26A 1.4670 . ?
 C25A C29A 1.4038 . ?
 C26A C27A 1.4007 . ?
 C26A C33A 1.4342 . ?
 C27A C30A 1.4541 . ?
 C28A C34A 1.3972 . ?
 C28A C39A 1.4391 . ?
 C30A C31A 1.4144 . ?
 C31A C32A 1.4115 . ?
 C31A C53A 1.4984 . ?
 C32A C33A 1.4319 . ?
 C32A C36A 1.4442 . ?
 C33A C34A 1.4338 . ?
 C34A C35A 1.4446 . ?
 C35A C36A 1.4245 . ?
 C35A C37A 1.3788 . ?
 C36A C50A 1.4219 . ?
 C37A C38A 1.4368 . ?
 C37A C49A 1.4596 . ?
 C38A C39A 1.4073 . ?
 C38A C43A 1.4259 . ?
 C39A C40A 1.4342 . ?
 C40A C41A 1.3554 . ?
 C41A C42A 1.4340 . ?
 C41A C70A 1.4757 . ?
 C42A C43A 1.3775 . ?
 C42A C61A 1.4461 . ?
 C43A C44A 1.4528 . ?
 C44A C45A 1.4515 . ?
 C44A C49A 1.4156 . ?
 C45A C46A 1.3933 . ?
 C45A C60A 1.4081 . ?
 C46A C47A 1.3746 . ?
 C46A C58A 1.4960 . ?
 C47A C48A 1.4776 . ?
 C47A C52A 1.4391 . ?
 C48A C49A 1.3739 . ?
 C48A C50A 1.4094 . ?
 C50A C51A 1.4608 . ?
 C51A C52A 1.4475 . ?
 C51A C53A 1.4004 . ?
 C52A C56A 1.4313 . ?
 C53A C54A 1.3808 . ?
 C54A C55A 1.4072 . ?
 C55A C56A 1.3783 . ?
 C56A C57A 1.4676 . ?
 C57A C58A 1.4183 . ?
 C57A C66A 1.3910 . ?
 C58A C59A 1.4266 . ?
 C59A C60A 1.4601 . ?
 C59A C65A 1.4093 . ?
 C60A C61A 1.4043 . ?
 C61A C62A 1.4504 . ?
 C62A C64A 1.4143 . ?
 C62A C70A 1.4422 . ?
 C63A C69A 1.4182 . ?
 C63A C70A 1.4185 . ?
 C64A C65A 1.5086 . ?
 C64A C68A 1.3751 . ?
 C65A C67A 1.4369 . ?
 C66A C67A 1.4164 . ?
 C68A C69A 1.4228 . ?
 C1B C2B 1.3539 . ?
 C1B C6B 1.4526 . ?
 C1B C27B 1.4786 . ?
 C2B C3B 1.4560 . ?
 C2B C29B 1.4433 . ?
 C3B C4B 1.4442 . ?
 C3B C7B 1.3873 . ?
 C4B C5B 1.4051 . ?
 C4B C10B 1.4185 . ?
 C5B C6B 1.3863 . ?
 C5B C12B 1.4956 . ?
 C6B C13B 1.4431 . ?
 C7B C8B 1.3600 . ?
 C7B C21B 1.4461 . ?
 C8B C9B 1.4672 . ?
 C8B C69B 1.4621 . ?
 C9B C10B 1.3963 . ?
 C9B C20B 1.4420 . ?
 C10B C11B 1.4409 . ?
 C11B C12B 1.4039 . ?
 C11B C18B 1.4387 . ?
 C12B C15B 1.4122 . ?
 C13B C14B 1.3582 . ?
 C13B C30B 1.4628 . ?
 C14B C15B 1.4442 . ?
 C14B C54B 1.4806 . ?
 C15B C16B 1.4481 . ?
 C16B C17B 1.3676 . ?
 C16B C55B 1.4756 . ?
 C17B C18B 1.4322 . ?
 C17B C66B 1.4712 . ?
 C18B C19B 1.4548 . ?
 C19B C20B 1.3955 . ?
 C19B C67B 1.4211 . ?
 C20B C68B 1.4357 . ?
 C21B C22B 1.4306 . ?
 C21B C29B 1.4387 . ?
 C22B C23B 1.4147 . ?
 C22B C63B 1.4243 . ?
 C23B C24B 1.4277 . ?
 C23B C40B 1.4662 . ?
 C24B C25B 1.4185 . ?
 C24B C28B 1.4465 . ?
 C25B C26B 1.4672 . ?
 C25B C29B 1.4039 . ?
 C26B C27B 1.4000 . ?
 C26B C33B 1.4341 . ?
 C27B C30B 1.4538 . ?
 C28B C34B 1.3968 . ?
 C28B C39B 1.4388 . ?
 C30B C31B 1.4151 . ?
 C31B C32B 1.4104 . ?
 C31B C53B 1.4988 . ?
 C32B C33B 1.4319 . ?
 C32B C36B 1.4434 . ?
 C33B C34B 1.4327 . ?
 C34B C35B 1.4453 . ?
 C35B C36B 1.4254 . ?
 C35B C37B 1.3786 . ?
 C36B C50B 1.4213 . ?
 C37B C38B 1.4362 . ?
 C37B C49B 1.4592 . ?
 C38B C39B 1.4067 . ?
 C38B C43B 1.4258 . ?
 C39B C40B 1.4346 . ?
 C40B C41B 1.3542 . ?
 C41B C42B 1.4336 . ?
 C41B C70B 1.4761 . ?
 C42B C43B 1.3785 . ?
 C42B C61B 1.4466 . ?
 C43B C44B 1.4511 . ?
 C44B C45B 1.4519 . ?
 C44B C49B 1.4158 . ?
 C45B C46B 1.3930 . ?
 C45B C60B 1.4084 . ?
 C46B C47B 1.3747 . ?
 C46B C58B 1.4966 . ?
 C47B C48B 1.4775 . ?
 C47B C52B 1.4392 . ?
 C48B C49B 1.3748 . ?
 C48B C50B 1.4098 . ?
 C50B C51B 1.4603 . ?
 C51B C52B 1.4486 . ?
 C51B C53B 1.4001 . ?
 C52B C56B 1.4303 . ?
 C53B C54B 1.3806 . ?
 C54B C55B 1.4079 . ?
 C55B C56B 1.3796 . ?
 C56B C57B 1.4670 . ?
 C57B C58B 1.4190 . ?
 C57B C66B 1.3909 . ?
 C58B C59B 1.4252 . ?
 C59B C60B 1.4609 . ?
 C59B C65B 1.4096 . ?
 C60B C61B 1.4038 . ?
 C61B C62B 1.4508 . ?
 C62B C64B 1.4147 . ?
 C62B C70B 1.4416 . ?
 C63B C69B 1.4178 . ?
 C63B C70B 1.4194 . ?
 C64B C65B 1.5086 . ?
 C64B C68B 1.3758 . ?
 C65B C67B 1.4366 . ?
 C66B C67B 1.4149 . ?
 C68B C69B 1.4229 . ?

loop_
  _geom_angle_atom_site_label_1
  _geom_angle_atom_site_label_2
  _geom_angle_atom_site_label_3
  _geom_angle
  _geom_angle_site_symmetry_1
  _geom_angle_site_symmetry_3
  _geom_angle_publ_flag
 N2 S1 N1 101.44(15) . . ?
 C4 N1 S1 105.9(3) . . ?
 C5 N2 S1 106.1(3) . . ?
 C2 C1 H1 112.8 5 . ?
 C2 C1 H1 112.8 . . ?
 C2 C1 H1 112.8 9 . ?
 C2 C1 C2 105.97(19) 9 5 ?
 C2 C1 C2 105.97(19) 5 . ?
 C2 C1 C2 105.97(19) 9 . ?
 C3 C2 C1 125.3(3) . . ?
 C3 C2 C7 122.1(2) . . ?
 C7 C2 C1 112.6(2) . . ?
 C2 C3 H3 121.5 . . ?
 C2 C3 C4 117.0(3) . . ?
 C4 C3 H3 121.5 . . ?
 N1 C4 C3 125.7(3) . . ?
 N1 C4 C5 113.5(3) . . ?
 C3 C4 C5 120.8(3) . . ?
 N2 C5 C4 113.1(3) . . ?
 N2 C5 C6 125.9(3) . . ?
 C6 C5 C4 121.0(2) . . ?
 C5 C6 H6 121.4 . . ?
 C7 C6 C5 117.2(3) . . ?
 C7 C6 H6 121.4 . . ?
 C2 C7 C8 112.7(3) . . ?
 C6 C7 C2 122.0(3) . . ?
 C6 C7 C8 125.3(3) . . ?
 C7 C8 C7 106.3(2) 9 5 ?
 C7 C8 C7 106.3(2) 5 . ?
 C7 C8 C7 106.3(2) 9 . ?
 C7 C8 H8 112.5 9 . ?
 C7 C8 H8 112.5 5 . ?
 C7 C8 H8 112.5 . . ?
 S2 C9 S2 176.3(6) 24_656 . ?
 C9 S2 C9 116.9(5) 18_655 . ?
 C2A C1A C6A 122.9 . . ?
 C2A C1A C27A 119.3 . . ?
 C6A C1A C27A 108.4 . . ?
 C1A C2A C3A 120.4 . . ?
 C1A C2A C29A 120.5 . . ?
 C29A C2A C3A 105.7 . . ?
 C4A C3A C2A 117.6 . . ?
 C7A C3A C2A 110.8 . . ?
 C7A C3A C4A 119.3 . . ?
 C5A C4A C3A 118.9 . . ?
 C5A C4A C10A 110.3 . . ?
 C10A C4A C3A 118.7 . . ?
 C4A C5A C12A 105.7 . . ?
 C6A C5A C4A 124.0 . . ?
 C6A C5A C12A 117.5 . . ?
 C5A C6A C1A 116.0 . . ?
 C5A C6A C13A 122.2 . . ?
 C13A C6A C1A 108.4 . . ?
 C3A C7A C21A 107.1 . . ?
 C8A C7A C3A 123.0 . . ?
 C8A C7A C21A 119.2 . . ?
 C7A C8A C9A 119.0 . . ?
 C7A C8A C69A 120.9 . . ?
 C69A C8A C9A 106.8 . . ?
 C10A C9A C8A 119.0 . . ?
 C10A C9A C20A 122.5 . . ?
 C20A C9A C8A 106.3 . . ?
 C4A C10A C11A 107.9 . . ?
 C9A C10A C4A 121.0 . . ?
 C9A C10A C11A 118.3 . . ?
 C12A C11A C10A 108.0 . . ?
 C12A C11A C18A 119.5 . . ?
 C18A C11A C10A 120.4 . . ?
 C11A C12A C5A 108.1 . . ?
 C11A C12A C15A 120.7 . . ?
 C15A C12A C5A 119.0 . . ?
 C6A C13A C30A 107.5 . . ?
 C14A C13A C6A 120.5 . . ?
 C14A C13A C30A 121.3 . . ?
 C13A C14A C15A 120.3 . . ?
 C13A C14A C54A 119.4 . . ?
 C15A C14A C54A 108.6 . . ?
 C12A C15A C14A 120.5 . . ?
 C12A C15A C16A 120.1 . . ?
 C14A C15A C16A 106.4 . . ?
 C15A C16A C55A 109.2 . . ?
 C17A C16A C15A 118.6 . . ?
 C17A C16A C55A 120.6 . . ?
 C16A C17A C18A 122.7 . . ?
 C16A C17A C66A 118.3 . . ?
 C18A C17A C66A 106.3 . . ?
 C11A C18A C19A 119.1 . . ?
 C17A C18A C11A 118.4 . . ?
 C17A C18A C19A 109.1 . . ?
 C20A C19A C18A 120.2 . . ?
 C20A C19A C67A 122.1 . . ?
 C67A C19A C18A 106.7 . . ?
 C19A C20A C9A 119.4 . . ?
 C19A C20A C68A 118.4 . . ?
 C68A C20A C9A 110.5 . . ?
 C22A C21A C7A 120.8 . . ?
 C22A C21A C29A 120.7 . . ?
 C29A C21A C7A 108.5 . . ?
 C23A C22A C21A 116.2 . . ?
 C23A C22A C63A 118.4 . . ?
 C63A C22A C21A 119.7 . . ?
 C22A C23A C24A 121.4 . . ?
 C22A C23A C40A 122.6 . . ?
 C24A C23A C40A 107.4 . . ?
 C23A C24A C28A 108.2 . . ?
 C25A C24A C23A 120.9 . . ?
 C25A C24A C28A 121.2 . . ?
 C24A C25A C26A 118.3 . . ?
 C29A C25A C24A 117.2 . . ?
 C29A C25A C26A 117.3 . . ?
 C27A C26A C25A 119.9 . . ?
 C27A C26A C33A 115.1 . . ?
 C33A C26A C25A 119.6 . . ?
 C26A C27A C1A 120.5 . . ?
 C26A C27A C30A 122.5 . . ?
 C30A C27A C1A 106.2 . . ?
 C34A C28A C24A 119.9 . . ?
 C34A C28A C39A 119.8 . . ?
 C39A C28A C24A 108.5 . . ?
 C21A C29A C2A 107.9 . . ?
 C25A C29A C2A 122.2 . . ?
 C25A C29A C21A 121.0 . . ?
 C27A C30A C13A 109.3 . . ?
 C31A C30A C13A 120.3 . . ?
 C31A C30A C27A 119.8 . . ?
 C30A C31A C53A 118.3 . . ?
 C32A C31A C30A 116.9 . . ?
 C32A C31A C53A 118.3 . . ?
 C31A C32A C33A 121.4 . . ?
 C31A C32A C36A 123.7 . . ?
 C33A C32A C36A 106.3 . . ?
 C32A C33A C26A 121.1 . . ?
 C32A C33A C34A 108.1 . . ?
 C34A C33A C26A 120.0 . . ?
 C28A C34A C33A 120.7 . . ?
 C28A C34A C35A 119.3 . . ?
 C33A C34A C35A 109.5 . . ?
 C36A C35A C34A 105.4 . . ?
 C37A C35A C34A 120.5 . . ?
 C37A C35A C36A 122.2 . . ?
 C35A C36A C32A 110.7 . . ?
 C50A C36A C32A 118.4 . . ?
 C50A C36A C35A 118.1 . . ?
 C35A C37A C38A 121.1 . . ?
 C35A C37A C49A 119.1 . . ?
 C38A C37A C49A 107.9 . . ?
 C39A C38A C37A 118.5 . . ?
 C39A C38A C43A 120.1 . . ?
 C43A C38A C37A 109.1 . . ?
 C38A C39A C28A 120.8 . . ?
 C38A C39A C40A 117.8 . . ?
 C40A C39A C28A 107.6 . . ?
 C39A C40A C23A 108.3 . . ?
 C41A C40A C23A 118.9 . . ?
 C41A C40A C39A 122.4 . . ?
 C40A C41A C42A 119.0 . . ?
 C40A C41A C70A 119.4 . . ?
 C42A C41A C70A 108.4 . . ?
 C41A C42A C61A 107.1 . . ?
 C43A C42A C41A 120.6 . . ?
 C43A C42A C61A 121.6 . . ?
 C38A C43A C44A 106.4 . . ?
 C42A C43A C38A 119.9 . . ?
 C42A C43A C44A 120.7 . . ?
 C45A C44A C43A 117.4 . . ?
 C49A C44A C43A 110.0 . . ?
 C49A C44A C45A 118.8 . . ?
 C46A C45A C44A 118.4 . . ?
 C46A C45A C60A 109.4 . . ?
 C60A C45A C44A 120.5 . . ?
 C45A C46A C58A 108.9 . . ?
 C47A C46A C45A 123.3 . . ?
 C47A C46A C58A 117.1 . . ?
 C46A C47A C48A 118.4 . . ?
 C46A C47A C52A 122.0 . . ?
 C52A C47A C48A 107.0 . . ?
 C49A C48A C47A 119.0 . . ?
 C49A C48A C50A 122.7 . . ?
 C50A C48A C47A 106.5 . . ?
 C44A C49A C37A 106.6 . . ?
 C48A C49A C37A 118.4 . . ?
 C48A C49A C44A 122.0 . . ?
 C36A C50A C51A 118.1 . . ?
 C48A C50A C36A 119.4 . . ?
 C48A C50A C51A 111.8 . . ?
 C52A C51A C50A 104.4 . . ?
 C53A C51A C50A 124.6 . . ?
 C53A C51A C52A 121.0 . . ?
 C47A C52A C51A 110.4 . . ?
 C56A C52A C47A 121.7 . . ?
 C56A C52A C51A 119.8 . . ?
 C51A C53A C31A 116.7 . . ?
 C54A C53A C31A 119.3 . . ?
 C54A C53A C51A 117.1 . . ?
 C53A C54A C14A 121.2 . . ?
 C53A C54A C55A 120.7 . . ?
 C55A C54A C14A 108.4 . . ?
 C54A C55A C16A 107.5 . . ?
 C56A C55A C16A 120.6 . . ?
 C56A C55A C54A 123.8 . . ?
 C52A C56A C57A 117.9 . . ?
 C55A C56A C52A 115.4 . . ?
 C55A C56A C57A 119.5 . . ?
 C58A C57A C56A 118.8 . . ?
 C66A C57A C56A 118.7 . . ?
 C66A C57A C58A 116.3 . . ?
 C57A C58A C46A 122.2 . . ?
 C57A C58A C59A 121.5 . . ?
 C59A C58A C46A 105.1 . . ?
 C58A C59A C60A 108.7 . . ?
 C65A C59A C58A 120.2 . . ?
 C65A C59A C60A 122.9 . . ?
 C45A C60A C59A 107.9 . . ?
 C61A C60A C45A 121.4 . . ?
 C61A C60A C59A 118.4 . . ?
 C42A C61A C62A 109.8 . . ?
 C60A C61A C42A 118.4 . . ?
 C60A C61A C62A 120.5 . . ?
 C64A C62A C61A 122.1 . . ?
 C64A C62A C70A 120.8 . . ?
 C70A C62A C61A 106.9 . . ?
 C69A C63A C22A 118.7 . . ?
 C69A C63A C70A 115.7 . . ?
 C70A C63A C22A 119.1 . . ?
 C62A C64A C65A 118.0 . . ?
 C68A C64A C62A 116.5 . . ?
 C68A C64A C65A 118.7 . . ?
 C59A C65A C64A 118.0 . . ?
 C59A C65A C67A 117.3 . . ?
 C67A C65A C64A 117.5 . . ?
 C57A C66A C17A 121.8 . . ?
 C57A C66A C67A 122.5 . . ?
 C67A C66A C17A 107.8 . . ?
 C19A C67A C65A 120.0 . . ?
 C66A C67A C19A 109.9 . . ?
 C66A C67A C65A 119.7 . . ?
 C64A C68A C20A 122.8 . . ?
 C64A C68A C69A 122.6 . . ?
 C69A C68A C20A 106.8 . . ?
 C63A C69A C8A 120.3 . . ?
 C63A C69A C68A 120.9 . . ?
 C68A C69A C8A 109.6 . . ?
 C62A C70A C41A 107.8 . . ?
 C63A C70A C41A 121.5 . . ?
 C63A C70A C62A 120.8 . . ?
 C2B C1B C6B 122.9 . . ?
 C2B C1B C27B 119.3 . . ?
 C6B C1B C27B 108.4 . . ?
 C1B C2B C3B 120.5 . . ?
 C1B C2B C29B 120.5 . . ?
 C29B C2B C3B 105.8 . . ?
 C4B C3B C2B 117.6 . . ?
 C7B C3B C2B 110.7 . . ?
 C7B C3B C4B 119.3 . . ?
 C5B C4B C3B 118.8 . . ?
 C5B C4B C10B 110.2 . . ?
 C10B C4B C3B 118.7 . . ?
 C4B C5B C12B 105.7 . . ?
 C6B C5B C4B 124.1 . . ?
 C6B C5B C12B 117.4 . . ?
 C5B C6B C1B 116.0 . . ?
 C5B C6B C13B 122.3 . . ?
 C13B C6B C1B 108.4 . . ?
 C3B C7B C21B 107.2 . . ?
 C8B C7B C3B 123.0 . . ?
 C8B C7B C21B 119.1 . . ?
 C7B C8B C9B 119.0 . . ?
 C7B C8B C69B 120.8 . . ?
 C69B C8B C9B 106.9 . . ?
 C10B C9B C8B 119.0 . . ?
 C10B C9B C20B 122.4 . . ?
 C20B C9B C8B 106.2 . . ?
 C4B C10B C11B 107.9 . . ?
 C9B C10B C4B 120.9 . . ?
 C9B C10B C11B 118.4 . . ?
 C12B C11B C10B 108.1 . . ?
 C12B C11B C18B 119.5 . . ?
 C18B C11B C10B 120.5 . . ?
 C11B C12B C5B 108.1 . . ?
 C11B C12B C15B 120.7 . . ?
 C15B C12B C5B 119.0 . . ?
 C6B C13B C30B 107.5 . . ?
 C14B C13B C6B 120.4 . . ?
 C14B C13B C30B 121.3 . . ?
 C13B C14B C15B 120.3 . . ?
 C13B C14B C54B 119.3 . . ?
 C15B C14B C54B 108.6 . . ?
 C12B C15B C14B 120.5 . . ?
 C12B C15B C16B 120.1 . . ?
 C14B C15B C16B 106.4 . . ?
 C15B C16B C55B 109.2 . . ?
 C17B C16B C15B 118.6 . . ?
 C17B C16B C55B 120.5 . . ?
 C16B C17B C18B 122.6 . . ?
 C16B C17B C66B 118.3 . . ?
 C18B C17B C66B 106.4 . . ?
 C11B C18B C19B 119.1 . . ?
 C17B C18B C11B 118.4 . . ?
 C17B C18B C19B 109.0 . . ?
 C20B C19B C18B 120.2 . . ?
 C20B C19B C67B 122.1 . . ?
 C67B C19B C18B 106.7 . . ?
 C19B C20B C9B 119.4 . . ?
 C19B C20B C68B 118.4 . . ?
 C68B C20B C9B 110.5 . . ?
 C22B C21B C7B 120.9 . . ?
 C22B C21B C29B 120.7 . . ?
 C29B C21B C7B 108.5 . . ?
 C23B C22B C21B 116.2 . . ?
 C23B C22B C63B 118.4 . . ?
 C63B C22B C21B 119.7 . . ?
 C22B C23B C24B 121.4 . . ?
 C22B C23B C40B 122.6 . . ?
 C24B C23B C40B 107.4 . . ?
 C23B C24B C28B 108.2 . . ?
 C25B C24B C23B 120.9 . . ?
 C25B C24B C28B 121.1 . . ?
 C24B C25B C26B 118.3 . . ?
 C29B C25B C24B 117.1 . . ?
 C29B C25B C26B 117.4 . . ?
 C27B C26B C25B 119.9 . . ?
 C27B C26B C33B 115.1 . . ?
 C33B C26B C25B 119.6 . . ?
 C26B C27B C1B 120.5 . . ?
 C26B C27B C30B 122.5 . . ?
 C30B C27B C1B 106.2 . . ?
 C34B C28B C24B 119.9 . . ?
 C34B C28B C39B 119.9 . . ?
 C39B C28B C24B 108.5 . . ?
 C21B C29B C2B 107.8 . . ?
 C25B C29B C2B 122.2 . . ?
 C25B C29B C21B 121.1 . . ?
 C27B C30B C13B 109.3 . . ?
 C31B C30B C13B 120.3 . . ?
 C31B C30B C27B 119.8 . . ?
 C30B C31B C53B 118.2 . . ?
 C32B C31B C30B 116.9 . . ?
 C32B C31B C53B 118.4 . . ?
 C31B C32B C33B 121.5 . . ?
 C31B C32B C36B 123.7 . . ?
 C33B C32B C36B 106.3 . . ?
 C32B C33B C26B 121.1 . . ?
 C32B C33B C34B 108.1 . . ?
 C34B C33B C26B 120.1 . . ?
 C28B C34B C33B 120.7 . . ?
 C28B C34B C35B 119.3 . . ?
 C33B C34B C35B 109.5 . . ?
 C36B C35B C34B 105.3 . . ?
 C37B C35B C34B 120.5 . . ?
 C37B C35B C36B 122.3 . . ?
 C35B C36B C32B 110.7 . . ?
 C50B C36B C32B 118.4 . . ?
 C50B C36B C35B 118.1 . . ?
 C35B C37B C38B 121.1 . . ?
 C35B C37B C49B 119.1 . . ?
 C38B C37B C49B 107.9 . . ?
 C39B C38B C37B 118.5 . . ?
 C39B C38B C43B 120.2 . . ?
 C43B C38B C37B 109.0 . . ?
 C38B C39B C28B 120.7 . . ?
 C38B C39B C40B 117.8 . . ?
 C40B C39B C28B 107.6 . . ?
 C39B C40B C23B 108.3 . . ?
 C41B C40B C23B 118.9 . . ?
 C41B C40B C39B 122.4 . . ?
 C40B C41B C42B 119.0 . . ?
 C40B C41B C70B 119.4 . . ?
 C42B C41B C70B 108.3 . . ?
 C41B C42B C61B 107.1 . . ?
 C43B C42B C41B 120.6 . . ?
 C43B C42B C61B 121.5 . . ?
 C38B C43B C44B 106.5 . . ?
 C42B C43B C38B 119.9 . . ?
 C42B C43B C44B 120.8 . . ?
 C43B C44B C45B 117.4 . . ?
 C49B C44B C43B 110.0 . . ?
 C49B C44B C45B 118.9 . . ?
 C46B C45B C44B 118.4 . . ?
 C46B C45B C60B 109.4 . . ?
 C60B C45B C44B 120.5 . . ?
 C45B C46B C58B 108.8 . . ?
 C47B C46B C45B 123.3 . . ?
 C47B C46B C58B 117.1 . . ?
 C46B C47B C48B 118.4 . . ?
 C46B C47B C52B 122.0 . . ?
 C52B C47B C48B 107.0 . . ?
 C49B C48B C47B 119.0 . . ?
 C49B C48B C50B 122.7 . . ?
 C50B C48B C47B 106.6 . . ?
 C44B C49B C37B 106.6 . . ?
 C48B C49B C37B 118.4 . . ?
 C48B C49B C44B 122.0 . . ?
 C36B C50B C51B 118.0 . . ?
 C48B C50B C36B 119.4 . . ?
 C48B C50B C51B 111.7 . . ?
 C52B C51B C50B 104.5 . . ?
 C53B C51B C50B 124.7 . . ?
 C53B C51B C52B 121.0 . . ?
 C47B C52B C51B 110.3 . . ?
 C56B C52B C47B 121.6 . . ?
 C56B C52B C51B 119.8 . . ?
 C51B C53B C31B 116.6 . . ?
 C54B C53B C31B 119.3 . . ?
 C54B C53B C51B 117.1 . . ?
 C53B C54B C14B 121.3 . . ?
 C53B C54B C55B 120.7 . . ?
 C55B C54B C14B 108.3 . . ?
 C54B C55B C16B 107.5 . . ?
 C56B C55B C16B 120.6 . . ?
 C56B C55B C54B 123.8 . . ?
 C52B C56B C57B 118.0 . . ?
 C55B C56B C52B 115.4 . . ?
 C55B C56B C57B 119.4 . . ?
 C58B C57B C56B 118.7 . . ?
 C66B C57B C56B 118.8 . . ?
 C66B C57B C58B 116.3 . . ?
 C57B C58B C46B 122.2 . . ?
 C57B C58B C59B 121.4 . . ?
 C59B C58B C46B 105.1 . . ?
 C58B C59B C60B 108.7 . . ?
 C65B C59B C58B 120.2 . . ?
 C65B C59B C60B 122.8 . . ?
 C45B C60B C59B 107.9 . . ?
 C61B C60B C45B 121.4 . . ?
 C61B C60B C59B 118.4 . . ?
 C42B C61B C62B 109.7 . . ?
 C60B C61B C42B 118.5 . . ?
 C60B C61B C62B 120.5 . . ?
 C64B C62B C61B 122.0 . . ?
 C64B C62B C70B 120.9 . . ?
 C70B C62B C61B 106.9 . . ?
 C69B C63B C22B 118.7 . . ?
 C69B C63B C70B 115.6 . . ?
 C70B C63B C22B 119.1 . . ?
 C62B C64B C65B 118.1 . . ?
 C68B C64B C62B 116.5 . . ?
 C68B C64B C65B 118.7 . . ?
 C59B C65B C64B 118.0 . . ?
 C59B C65B C67B 117.3 . . ?
 C67B C65B C64B 117.5 . . ?
 C57B C66B C17B 121.8 . . ?
 C57B C66B C67B 122.6 . . ?
 C67B C66B C17B 107.8 . . ?
 C19B C67B C65B 120.0 . . ?
 C66B C67B C19B 109.9 . . ?
 C66B C67B C65B 119.7 . . ?
 C64B C68B C20B 122.8 . . ?
 C64B C68B C69B 122.7 . . ?
 C69B C68B C20B 106.8 . . ?
 C63B C69B C8B 120.3 . . ?
 C63B C69B C68B 120.9 . . ?
 C68B C69B C8B 109.6 . . ?
 C62B C70B C41B 107.9 . . ?
 C63B C70B C41B 121.5 . . ?
 C63B C70B C62B 120.8 . . ?

loop_
  _geom_torsion_atom_site_label_1
  _geom_torsion_atom_site_label_2
  _geom_torsion_atom_site_label_3
  _geom_torsion_atom_site_label_4
  _geom_torsion
  _geom_torsion_site_symmetry_1
  _geom_torsion_site_symmetry_2
  _geom_torsion_site_symmetry_3
  _geom_torsion_site_symmetry_4
  _geom_torsion_publ_flag
 S1 N1 C4 C3 -179.8(2) . . . . ?
 S1 N1 C4 C5 0.1(3) . . . . ?
 S1 N2 C5 C4 -0.4(3) . . . . ?
 S1 N2 C5 C6 178.9(2) . . . . ?
 N1 S1 N2 C5 0.4(2) . . . . ?
 N1 C4 C5 N2 0.1(3) . . . . ?
 N1 C4 C5 C6 -179.1(2) . . . . ?
 N2 S1 N1 C4 -0.3(2) . . . . ?
 N2 C5 C6 C7 -178.9(3) . . . . ?
 C1 C2 C3 C4 -178.94(19) . . . . ?
 C1 C2 C7 C6 -179.9(2) . . . . ?
 C1 C2 C7 C8 -0.2(3) . . . . ?
 C2 C1 C2 C3 123.6(3) 9 . . . ?
 C2 C1 C2 C3 -124.1(3) 5 . . . ?
 C2 C1 C2 C7 -56.1(2) 9 . . . ?
 C2 C1 C2 C7 56.3(2) 5 . . . ?
 C2 C3 C4 N1 178.7(2) . . . . ?
 C2 C3 C4 C5 -1.3(3) . . . . ?
 C2 C7 C8 C7 56.6(3) . . . 9 ?
 C2 C7 C8 C7 -56.4(3) . . . 5 ?
 C3 C2 C7 C6 0.5(4) . . . . ?
 C3 C2 C7 C8 -179.82(19) . . . . ?
 C3 C4 C5 N2 -179.9(2) . . . . ?
 C3 C4 C5 C6 0.9(4) . . . . ?
 C4 C5 C6 C7 0.2(4) . . . . ?
 C5 C6 C7 C2 -0.9(4) . . . . ?
 C5 C6 C7 C8 179.4(2) . . . . ?
 C6 C7 C8 C7 -123.7(4) . . . 9 ?
 C6 C7 C8 C7 123.3(4) . . . 5 ?
 C7 C2 C3 C4 0.7(3) . . . . ?
 C1A C2A C3A C4A 2.8 . . . . ?
 C1A C2A C3A C7A -139.4 . . . . ?
 C1A C2A C29A C21A 140.4 . . . . ?
 C1A C2A C29A C25A -7.1 . . . . ?
 C1A C6A C13A C14A -140.9 . . . . ?
 C1A C6A C13A C30A 3.9 . . . . ?
 C1A C27A C30A C13A 0.7 . . . . ?
 C1A C27A C30A C31A 145.4 . . . . ?
 C2A C1A C6A C5A 0.5 . . . . ?
 C2A C1A C6A C13A 142.6 . . . . ?
 C2A C1A C27A C26A -0.7 . . . . ?
 C2A C1A C27A C30A -145.8 . . . . ?
 C2A C3A C4A C5A -0.4 . . . . ?
 C2A C3A C4A C10A -139.2 . . . . ?
 C2A C3A C7A C8A 141.9 . . . . ?
 C2A C3A C7A C21A -2.0 . . . . ?
 C3A C2A C29A C21A -0.5 . . . . ?
 C3A C2A C29A C25A -148.0 . . . . ?
 C3A C4A C5A C6A -2.0 . . . . ?
 C3A C4A C5A C12A -142.1 . . . . ?
 C3A C4A C10A C9A 1.1 . . . . ?
 C3A C4A C10A C11A 141.9 . . . . ?
 C3A C7A C8A C9A -1.2 . . . . ?
 C3A C7A C8A C69A -137.0 . . . . ?
 C3A C7A C21A C22A 147.4 . . . . ?
 C3A C7A C21A C29A 1.6 . . . . ?
 C4A C3A C7A C8A 0.5 . . . . ?
 C4A C3A C7A C21A -143.4 . . . . ?
 C4A C5A C6A C1A 2.0 . . . . ?
 C4A C5A C6A C13A -134.4 . . . . ?
 C4A C5A C12A C11A 0.4 . . . . ?
 C4A C5A C12A C15A 143.1 . . . . ?
 C4A C10A C11A C12A 0.4 . . . . ?
 C4A C10A C11A C18A -142.0 . . . . ?
 C5A C4A C10A C9A -141.0 . . . . ?
 C5A C4A C10A C11A -0.1 . . . . ?
 C5A C6A C13A C14A -1.7 . . . . ?
 C5A C6A C13A C30A 143.1 . . . . ?
 C5A C12A C15A C14A -1.0 . . . . ?
 C5A C12A C15A C16A -137.0 . . . . ?
 C6A C1A C2A C3A -2.9 . . . . ?
 C6A C1A C2A C29A -138.2 . . . . ?
 C6A C1A C27A C26A 146.8 . . . . ?
 C6A C1A C27A C30A 1.7 . . . . ?
 C6A C5A C12A C11A -142.8 . . . . ?
 C6A C5A C12A C15A -0.1 . . . . ?
 C6A C13A C14A C15A 0.5 . . . . ?
 C6A C13A C14A C54A 139.4 . . . . ?
 C6A C13A C30A C27A -2.8 . . . . ?
 C6A C13A C30A C31A -147.3 . . . . ?
 C7A C3A C4A C5A 138.4 . . . . ?
 C7A C3A C4A C10A -0.4 . . . . ?
 C7A C8A C9A C10A 1.8 . . . . ?
 C7A C8A C9A C20A -141.5 . . . . ?
 C7A C8A C69A C63A -7.2 . . . . ?
 C7A C8A C69A C68A 139.9 . . . . ?
 C7A C21A C22A C23A -155.4 . . . . ?
 C7A C21A C22A C63A -2.5 . . . . ?
 C7A C21A C29A C2A -0.6 . . . . ?
 C7A C21A C29A C25A 147.4 . . . . ?
 C8A C7A C21A C22A 1.9 . . . . ?
 C8A C7A C21A C29A -143.9 . . . . ?
 C8A C9A C10A C4A -1.8 . . . . ?
 C8A C9A C10A C11A -138.7 . . . . ?
 C8A C9A C20A C19A 143.4 . . . . ?
 C8A C9A C20A C68A 0.9 . . . . ?
 C9A C8A C69A C63A -147.6 . . . . ?
 C9A C8A C69A C68A -0.6 . . . . ?
 C9A C10A C11A C12A 142.4 . . . . ?
 C9A C10A C11A C18A 0.0 . . . . ?
 C9A C20A C68A C64A 148.6 . . . . ?
 C9A C20A C68A C69A -1.3 . . . . ?
 C10A C4A C5A C6A 140.0 . . . . ?
 C10A C4A C5A C12A -0.2 . . . . ?
 C10A C9A C20A C19A 1.7 . . . . ?
 C10A C9A C20A C68A -140.8 . . . . ?
 C10A C11A C12A C5A -0.4 . . . . ?
 C10A C11A C12A C15A -142.4 . . . . ?
 C10A C11A C18A C17A 137.9 . . . . ?
 C10A C11A C18A C19A 1.3 . . . . ?
 C11A C12A C15A C14A 137.0 . . . . ?
 C11A C12A C15A C16A 0.9 . . . . ?
 C11A C18A C19A C20A -1.1 . . . . ?
 C11A C18A C19A C67A 143.7 . . . . ?
 C12A C5A C6A C1A 137.9 . . . . ?
 C12A C5A C6A C13A 1.5 . . . . ?
 C12A C11A C18A C17A -0.2 . . . . ?
 C12A C11A C18A C19A -136.9 . . . . ?
 C12A C15A C16A C17A -2.4 . . . . ?
 C12A C15A C16A C55A 141.1 . . . . ?
 C13A C14A C15A C12A 0.8 . . . . ?
 C13A C14A C15A C16A 142.0 . . . . ?
 C13A C14A C54A C53A 4.6 . . . . ?
 C13A C14A C54A C55A -141.6 . . . . ?
 C13A C30A C31A C32A 153.7 . . . . ?
 C13A C30A C31A C53A 2.5 . . . . ?
 C14A C13A C30A C27A 141.6 . . . . ?
 C14A C13A C30A C31A -2.9 . . . . ?
 C14A C15A C16A C17A -143.8 . . . . ?
 C14A C15A C16A C55A -0.4 . . . . ?
 C14A C54A C55A C16A -1.8 . . . . ?
 C14A C54A C55A C56A 146.7 . . . . ?
 C15A C14A C54A C53A 147.8 . . . . ?
 C15A C14A C54A C55A 1.6 . . . . ?
 C15A C16A C17A C18A 2.6 . . . . ?
 C15A C16A C17A C66A 139.0 . . . . ?
 C15A C16A C55A C54A 1.4 . . . . ?
 C15A C16A C55A C56A -148.3 . . . . ?
 C16A C17A C18A C11A -1.3 . . . . ?
 C16A C17A C18A C19A 139.3 . . . . ?
 C16A C17A C66A C57A 5.9 . . . . ?
 C16A C17A C66A C67A -143.8 . . . . ?
 C16A C55A C56A C52A 155.9 . . . . ?
 C16A C55A C56A C57A 6.1 . . . . ?
 C17A C16A C55A C54A 144.0 . . . . ?
 C17A C16A C55A C56A -5.7 . . . . ?
 C17A C18A C19A C20A -141.4 . . . . ?
 C17A C18A C19A C67A 3.4 . . . . ?
 C17A C66A C67A C19A 3.3 . . . . ?
 C17A C66A C67A C65A 148.2 . . . . ?
 C18A C11A C12A C5A 142.3 . . . . ?
 C18A C11A C12A C15A 0.4 . . . . ?
 C18A C17A C66A C57A 148.7 . . . . ?
 C18A C17A C66A C67A -1.1 . . . . ?
 C18A C19A C20A C9A -0.3 . . . . ?
 C18A C19A C20A C68A 139.3 . . . . ?
 C18A C19A C67A C65A -148.9 . . . . ?
 C18A C19A C67A C66A -4.1 . . . . ?
 C19A C20A C68A C64A 5.7 . . . . ?
 C19A C20A C68A C69A -144.2 . . . . ?
 C20A C9A C10A C4A 135.4 . . . . ?
 C20A C9A C10A C11A -1.5 . . . . ?
 C20A C19A C67A C65A -4.9 . . . . ?
 C20A C19A C67A C66A 139.9 . . . . ?
 C20A C68A C69A C8A 1.2 . . . . ?
 C20A C68A C69A C63A 148.0 . . . . ?
 C21A C7A C8A C9A 138.6 . . . . ?
 C21A C7A C8A C69A 2.8 . . . . ?
 C21A C22A C23A C24A 12.6 . . . . ?
 C21A C22A C23A C40A 156.3 . . . . ?
 C21A C22A C63A C69A -1.8 . . . . ?
 C21A C22A C63A C70A -152.2 . . . . ?
 C22A C21A C29A C2A -146.5 . . . . ?
 C22A C21A C29A C25A 1.5 . . . . ?
 C22A C23A C24A C25A 0.8 . . . . ?
 C22A C23A C24A C28A 147.0 . . . . ?
 C22A C23A C40A C39A -148.2 . . . . ?
 C22A C23A C40A C41A -2.4 . . . . ?
 C22A C63A C69A C8A 6.5 . . . . ?
 C22A C63A C69A C68A -136.8 . . . . ?
 C22A C63A C70A C41A -3.8 . . . . ?
 C22A C63A C70A C62A 137.7 . . . . ?
 C23A C22A C63A C69A 150.6 . . . . ?
 C23A C22A C63A C70A 0.2 . . . . ?
 C23A C24A C25A C26A 136.4 . . . . ?
 C23A C24A C25A C29A -13.2 . . . . ?
 C23A C24A C28A C34A -140.3 . . . . ?
 C23A C24A C28A C39A 2.5 . . . . ?
 C23A C40A C41A C42A -137.7 . . . . ?
 C23A C40A C41A C70A -1.3 . . . . ?
 C24A C23A C40A C39A -0.2 . . . . ?
 C24A C23A C40A C41A 145.6 . . . . ?
 C24A C25A C26A C27A -151.2 . . . . ?
 C24A C25A C26A C33A 1.5 . . . . ?
 C24A C25A C29A C2A 155.5 . . . . ?
 C24A C25A C29A C21A 12.1 . . . . ?
 C24A C28A C34A C33A -2.0 . . . . ?
 C24A C28A C34A C35A 139.1 . . . . ?
 C24A C28A C39A C38A -141.9 . . . . ?
 C24A C28A C39A C40A -2.6 . . . . ?
 C25A C24A C28A C34A 5.8 . . . . ?
 C25A C24A C28A C39A 148.7 . . . . ?
 C25A C26A C27A C1A -0.8 . . . . ?
 C25A C26A C27A C30A 138.6 . . . . ?
 C25A C26A C33A C32A -138.0 . . . . ?
 C25A C26A C33A C34A 2.1 . . . . ?
 C26A C25A C29A C2A 5.5 . . . . ?
 C26A C25A C29A C21A -137.9 . . . . ?
 C26A C27A C30A C13A -143.6 . . . . ?
 C26A C27A C30A C31A 1.2 . . . . ?
 C26A C33A C34A C28A -1.9 . . . . ?
 C26A C33A C34A C35A -146.4 . . . . ?
 C27A C1A C2A C3A 139.8 . . . . ?
 C27A C1A C2A C29A 4.5 . . . . ?
 C27A C1A C6A C5A -145.6 . . . . ?
 C27A C1A C6A C13A -3.5 . . . . ?
 C27A C26A C33A C32A 16.0 . . . . ?
 C27A C26A C33A C34A 156.2 . . . . ?
 C27A C30A C31A C32A 12.8 . . . . ?
 C27A C30A C31A C53A -138.4 . . . . ?
 C28A C24A C25A C26A -5.5 . . . . ?
 C28A C24A C25A C29A -155.2 . . . . ?
 C28A C34A C35A C36A -144.6 . . . . ?
 C28A C34A C35A C37A -1.1 . . . . ?
 C28A C39A C40A C23A 1.7 . . . . ?
 C28A C39A C40A C41A -142.6 . . . . ?
 C29A C2A C3A C4A 143.7 . . . . ?
 C29A C2A C3A C7A 1.6 . . . . ?
 C29A C21A C22A C23A -13.7 . . . . ?
 C29A C21A C22A C63A 139.3 . . . . ?
 C29A C25A C26A C27A -1.6 . . . . ?
 C29A C25A C26A C33A 151.2 . . . . ?
 C30A C13A C14A C15A -139.4 . . . . ?
 C30A C13A C14A C54A -0.6 . . . . ?
 C30A C31A C32A C33A -12.2 . . . . ?
 C30A C31A C32A C36A -155.6 . . . . ?
 C30A C31A C53A C51A 151.4 . . . . ?
 C30A C31A C53A C54A 1.4 . . . . ?
 C31A C32A C33A C26A -2.5 . . . . ?
 C31A C32A C33A C34A -146.8 . . . . ?
 C31A C32A C36A C35A 146.1 . . . . ?
 C31A C32A C36A C50A 5.1 . . . . ?
 C31A C53A C54A C14A -4.9 . . . . ?
 C31A C53A C54A C55A 137.1 . . . . ?
 C32A C31A C53A C51A 0.5 . . . . ?
 C32A C31A C53A C54A -149.4 . . . . ?
 C32A C33A C34A C28A 142.9 . . . . ?
 C32A C33A C34A C35A -1.6 . . . . ?
 C32A C36A C50A C48A 139.6 . . . . ?
 C32A C36A C50A C51A -1.9 . . . . ?
 C33A C26A C27A C1A -154.7 . . . . ?
 C33A C26A C27A C30A -15.4 . . . . ?
 C33A C32A C36A C35A -1.9 . . . . ?
 C33A C32A C36A C50A -142.9 . . . . ?
 C33A C34A C35A C36A 0.5 . . . . ?
 C33A C34A C35A C37A 144.0 . . . . ?
 C34A C28A C39A C38A 1.0 . . . . ?
 C34A C28A C39A C40A 140.2 . . . . ?
 C34A C35A C36A C32A 0.9 . . . . ?
 C34A C35A C36A C50A 142.0 . . . . ?
 C34A C35A C37A C38A 0.4 . . . . ?
 C34A C35A C37A C49A -137.9 . . . . ?
 C35A C36A C50A C48A 1.4 . . . . ?
 C35A C36A C50A C51A -140.0 . . . . ?
 C35A C37A C38A C39A 1.0 . . . . ?
 C35A C37A C38A C43A -141.4 . . . . ?
 C35A C37A C49A C44A 143.2 . . . . ?
 C35A C37A C49A C48A 1.0 . . . . ?
 C36A C32A C33A C26A 146.4 . . . . ?
 C36A C32A C33A C34A 2.1 . . . . ?
 C36A C35A C37A C38A 137.7 . . . . ?
 C36A C35A C37A C49A -0.5 . . . . ?
 C36A C50A C51A C52A 143.5 . . . . ?
 C36A C50A C51A C53A -1.9 . . . . ?
 C37A C35A C36A C32A -141.8 . . . . ?
 C37A C35A C36A C50A -0.7 . . . . ?
 C37A C38A C39A C28A -1.7 . . . . ?
 C37A C38A C39A C40A -137.0 . . . . ?
 C37A C38A C43A C42A 140.0 . . . . ?
 C37A C38A C43A C44A -1.5 . . . . ?
 C38A C37A C49A C44A 0.0 . . . . ?
 C38A C37A C49A C48A -142.2 . . . . ?
 C38A C39A C40A C23A 142.4 . . . . ?
 C38A C39A C40A C41A -1.9 . . . . ?
 C38A C43A C44A C45A 141.7 . . . . ?
 C38A C43A C44A C49A 1.5 . . . . ?
 C39A C28A C34A C33A -140.7 . . . . ?
 C39A C28A C34A C35A 0.4 . . . . ?
 C39A C38A C43A C42A -1.6 . . . . ?
 C39A C38A C43A C44A -143.2 . . . . ?
 C39A C40A C41A C42A 3.0 . . . . ?
 C39A C40A C41A C70A 139.5 . . . . ?
 C40A C23A C24A C25A -147.7 . . . . ?
 C40A C23A C24A C28A -1.4 . . . . ?
 C40A C41A C42A C43A -3.4 . . . . ?
 C40A C41A C42A C61A 141.6 . . . . ?
 C40A C41A C70A C62A -141.5 . . . . ?
 C40A C41A C70A C63A 4.4 . . . . ?
 C41A C42A C43A C38A 2.7 . . . . ?
 C41A C42A C43A C44A 138.8 . . . . ?
 C41A C42A C61A C60A -144.2 . . . . ?
 C41A C42A C61A C62A -0.5 . . . . ?
 C42A C41A C70A C62A -0.9 . . . . ?
 C42A C41A C70A C63A 145.0 . . . . ?
 C42A C43A C44A C45A 0.5 . . . . ?
 C42A C43A C44A C49A -139.7 . . . . ?
 C42A C61A C62A C64A -145.4 . . . . ?
 C42A C61A C62A C70A -0.1 . . . . ?
 C43A C38A C39A C28A 136.5 . . . . ?
 C43A C38A C39A C40A 1.1 . . . . ?
 C43A C42A C61A C60A 0.3 . . . . ?
 C43A C42A C61A C62A 144.1 . . . . ?
 C43A C44A C45A C46A -138.2 . . . . ?
 C43A C44A C45A C60A 0.9 . . . . ?
 C43A C44A C49A C37A -1.0 . . . . ?
 C43A C44A C49A C48A 139.6 . . . . ?
 C44A C45A C46A C47A 1.8 . . . . ?
 C44A C45A C46A C58A 144.9 . . . . ?
 C44A C45A C60A C59A -143.3 . . . . ?
 C44A C45A C60A C61A -1.7 . . . . ?
 C45A C44A C49A C37A -140.5 . . . . ?
 C45A C44A C49A C48A 0.0 . . . . ?
 C45A C46A C47A C48A -0.3 . . . . ?
 C45A C46A C47A C52A 136.5 . . . . ?
 C45A C46A C58A C57A -145.8 . . . . ?
 C45A C46A C58A C59A -1.7 . . . . ?
 C45A C60A C61A C42A 1.1 . . . . ?
 C45A C60A C61A C62A -138.7 . . . . ?
 C46A C45A C60A C59A -0.9 . . . . ?
 C46A C45A C60A C61A 140.7 . . . . ?
 C46A C47A C48A C49A -1.3 . . . . ?
 C46A C47A C48A C50A 142.6 . . . . ?
 C46A C47A C52A C51A -141.4 . . . . ?
 C46A C47A C52A C56A 7.0 . . . . ?
 C46A C58A C59A C60A 1.2 . . . . ?
 C46A C58A C59A C65A -148.0 . . . . ?
 C47A C46A C58A C57A -0.1 . . . . ?
 C47A C46A C58A C59A 144.0 . . . . ?
 C47A C48A C49A C37A 137.6 . . . . ?
 C47A C48A C49A C44A 1.4 . . . . ?
 C47A C48A C50A C36A -143.2 . . . . ?
 C47A C48A C50A C51A 0.5 . . . . ?
 C47A C52A C56A C55A -156.0 . . . . ?
 C47A C52A C56A C57A -5.7 . . . . ?
 C48A C47A C52A C51A -0.4 . . . . ?
 C48A C47A C52A C56A 148.0 . . . . ?
 C48A C50A C51A C52A -0.7 . . . . ?
 C48A C50A C51A C53A -146.1 . . . . ?
 C49A C37A C38A C39A 143.3 . . . . ?
 C49A C37A C38A C43A 1.0 . . . . ?
 C49A C44A C45A C46A -1.6 . . . . ?
 C49A C44A C45A C60A 137.5 . . . . ?
 C49A C48A C50A C36A -1.0 . . . . ?
 C49A C48A C50A C51A 142.7 . . . . ?
 C50A C48A C49A C37A -0.2 . . . . ?
 C50A C48A C49A C44A -136.4 . . . . ?
 C50A C51A C52A C47A 0.7 . . . . ?
 C50A C51A C52A C56A -148.4 . . . . ?
 C50A C51A C53A C31A 2.5 . . . . ?
 C50A C51A C53A C54A 153.2 . . . . ?
 C51A C52A C56A C55A -10.5 . . . . ?
 C51A C52A C56A C57A 139.8 . . . . ?
 C51A C53A C54A C14A -154.8 . . . . ?
 C51A C53A C54A C55A -12.7 . . . . ?
 C52A C47A C48A C49A -143.9 . . . . ?
 C52A C47A C48A C50A -0.1 . . . . ?
 C52A C51A C53A C31A -137.6 . . . . ?
 C52A C51A C53A C54A 13.1 . . . . ?
 C52A C56A C57A C58A 1.7 . . . . ?
 C52A C56A C57A C66A -149.7 . . . . ?
 C53A C31A C32A C33A 139.0 . . . . ?
 C53A C31A C32A C36A -4.4 . . . . ?
 C53A C51A C52A C47A 147.6 . . . . ?
 C53A C51A C52A C56A -1.4 . . . . ?
 C53A C54A C55A C16A -148.2 . . . . ?
 C53A C54A C55A C56A 0.4 . . . . ?
 C54A C14A C15A C12A -142.0 . . . . ?
 C54A C14A C15A C16A -0.7 . . . . ?
 C54A C55A C56A C52A 11.3 . . . . ?
 C54A C55A C56A C57A -138.6 . . . . ?
 C55A C16A C17A C18A -136.7 . . . . ?
 C55A C16A C17A C66A -0.3 . . . . ?
 C55A C56A C57A C58A 150.8 . . . . ?
 C55A C56A C57A C66A -0.6 . . . . ?
 C56A C57A C58A C46A 1.1 . . . . ?
 C56A C57A C58A C59A -137.3 . . . . ?
 C56A C57A C66A C17A -5.5 . . . . ?
 C56A C57A C66A C67A 139.8 . . . . ?
 C57A C58A C59A C60A 145.6 . . . . ?
 C57A C58A C59A C65A -3.6 . . . . ?
 C57A C66A C67A C19A -146.2 . . . . ?
 C57A C66A C67A C65A -1.3 . . . . ?
 C58A C46A C47A C48A -140.7 . . . . ?
 C58A C46A C47A C52A -3.9 . . . . ?
 C58A C57A C66A C17A -157.6 . . . . ?
 C58A C57A C66A C67A -12.3 . . . . ?
 C58A C59A C60A C45A -0.3 . . . . ?
 C58A C59A C60A C61A -143.2 . . . . ?
 C58A C59A C65A C64A 139.4 . . . . ?
 C58A C59A C65A C67A -10.2 . . . . ?
 C59A C60A C61A C42A 138.8 . . . . ?
 C59A C60A C61A C62A -1.0 . . . . ?
 C59A C65A C67A C19A 154.1 . . . . ?
 C59A C65A C67A C66A 12.7 . . . . ?
 C60A C45A C46A C47A -141.5 . . . . ?
 C60A C45A C46A C58A 1.6 . . . . ?
 C60A C59A C65A C64A -5.4 . . . . ?
 C60A C59A C65A C67A -155.0 . . . . ?
 C60A C61A C62A C64A -2.5 . . . . ?
 C60A C61A C62A C70A 142.8 . . . . ?
 C61A C42A C43A C38A -137.2 . . . . ?
 C61A C42A C43A C44A -1.1 . . . . ?
 C61A C62A C64A C65A 2.1 . . . . ?
 C61A C62A C64A C68A 153.1 . . . . ?
 C61A C62A C70A C41A 0.6 . . . . ?
 C61A C62A C70A C63A -145.6 . . . . ?
 C62A C64A C65A C59A 1.8 . . . . ?
 C62A C64A C65A C67A 151.3 . . . . ?
 C62A C64A C68A C20A -156.9 . . . . ?
 C62A C64A C68A C69A -11.6 . . . . ?
 C63A C22A C23A C24A -140.7 . . . . ?
 C63A C22A C23A C40A 2.9 . . . . ?
 C64A C62A C70A C41A 146.4 . . . . ?
 C64A C62A C70A C63A 0.2 . . . . ?
 C64A C65A C67A C19A 4.4 . . . . ?
 C64A C65A C67A C66A -137.0 . . . . ?
 C64A C68A C69A C8A -148.8 . . . . ?
 C64A C68A C69A C63A -2.0 . . . . ?
 C65A C59A C60A C45A 148.0 . . . . ?
 C65A C59A C60A C61A 5.1 . . . . ?
 C65A C64A C68A C20A -6.1 . . . . ?
 C65A C64A C68A C69A 139.2 . . . . ?
 C66A C17A C18A C11A -142.0 . . . . ?
 C66A C17A C18A C19A -1.5 . . . . ?
 C66A C57A C58A C46A 153.2 . . . . ?
 C66A C57A C58A C59A 14.8 . . . . ?
 C67A C19A C20A C9A -139.6 . . . . ?
 C67A C19A C20A C68A 0.0 . . . . ?
 C68A C64A C65A C59A -148.6 . . . . ?
 C68A C64A C65A C67A 0.9 . . . . ?
 C69A C8A C9A C10A 143.1 . . . . ?
 C69A C8A C9A C20A -0.2 . . . . ?
 C69A C63A C70A C41A -155.1 . . . . ?
 C69A C63A C70A C62A -13.5 . . . . ?
 C70A C41A C42A C43A -144.2 . . . . ?
 C70A C41A C42A C61A 0.8 . . . . ?
 C70A C62A C64A C65A -138.6 . . . . ?
 C70A C62A C64A C68A 12.4 . . . . ?
 C70A C63A C69A C8A 157.8 . . . . ?
 C70A C63A C69A C68A 14.5 . . . . ?
 C1B C2B C3B C4B 2.7 . . . . ?
 C1B C2B C3B C7B -139.4 . . . . ?
 C1B C2B C29B C21B 140.4 . . . . ?
 C1B C2B C29B C25B -7.1 . . . . ?
 C1B C6B C13B C14B -141.0 . . . . ?
 C1B C6B C13B C30B 3.9 . . . . ?
 C1B C27B C30B C13B 0.7 . . . . ?
 C1B C27B C30B C31B 145.4 . . . . ?
 C2B C1B C6B C5B 0.5 . . . . ?
 C2B C1B C6B C13B 142.6 . . . . ?
 C2B C1B C27B C26B -0.6 . . . . ?
 C2B C1B C27B C30B -145.8 . . . . ?
 C2B C3B C4B C5B -0.4 . . . . ?
 C2B C3B C4B C10B -139.1 . . . . ?
 C2B C3B C7B C8B 141.9 . . . . ?
 C2B C3B C7B C21B -2.0 . . . . ?
 C3B C2B C29B C21B -0.6 . . . . ?
 C3B C2B C29B C25B -148.1 . . . . ?
 C3B C4B C5B C6B -1.9 . . . . ?
 C3B C4B C5B C12B -142.1 . . . . ?
 C3B C4B C10B C9B 0.9 . . . . ?
 C3B C4B C10B C11B 141.9 . . . . ?
 C3B C7B C8B C9B -1.2 . . . . ?
 C3B C7B C8B C69B -137.0 . . . . ?
 C3B C7B C21B C22B 147.4 . . . . ?
 C3B C7B C21B C29B 1.6 . . . . ?
 C4B C3B C7B C8B 0.5 . . . . ?
 C4B C3B C7B C21B -143.4 . . . . ?
 C4B C5B C6B C1B 1.9 . . . . ?
 C4B C5B C6B C13B -134.4 . . . . ?
 C4B C5B C12B C11B 0.4 . . . . ?
 C4B C5B C12B C15B 143.1 . . . . ?
 C4B C10B C11B C12B 0.3 . . . . ?
 C4B C10B C11B C18B -142.1 . . . . ?
 C5B C4B C10B C9B -141.0 . . . . ?
 C5B C4B C10B C11B -0.1 . . . . ?
 C5B C6B C13B C14B -1.8 . . . . ?
 C5B C6B C13B C30B 143.1 . . . . ?
 C5B C12B C15B C14B -0.9 . . . . ?
 C5B C12B C15B C16B -137.1 . . . . ?
 C6B C1B C2B C3B -2.8 . . . . ?
 C6B C1B C2B C29B -138.2 . . . . ?
 C6B C1B C27B C26B 146.8 . . . . ?
 C6B C1B C27B C30B 1.7 . . . . ?
 C6B C5B C12B C11B -142.9 . . . . ?
 C6B C5B C12B C15B -0.2 . . . . ?
 C6B C13B C14B C15B 0.7 . . . . ?
 C6B C13B C14B C54B 139.4 . . . . ?
 C6B C13B C30B C27B -2.9 . . . . ?
 C6B C13B C30B C31B -147.3 . . . . ?
 C7B C3B C4B C5B 138.3 . . . . ?
 C7B C3B C4B C10B -0.3 . . . . ?
 C7B C8B C9B C10B 1.7 . . . . ?
 C7B C8B C9B C20B -141.5 . . . . ?
 C7B C8B C69B C63B -7.2 . . . . ?
 C7B C8B C69B C68B 139.8 . . . . ?
 C7B C21B C22B C23B -155.4 . . . . ?
 C7B C21B C22B C63B -2.4 . . . . ?
 C7B C21B C29B C2B -0.6 . . . . ?
 C7B C21B C29B C25B 147.4 . . . . ?
 C8B C7B C21B C22B 1.8 . . . . ?
 C8B C7B C21B C29B -144.0 . . . . ?
 C8B C9B C10B C4B -1.6 . . . . ?
 C8B C9B C10B C11B -138.6 . . . . ?
 C8B C9B C20B C19B 143.4 . . . . ?
 C8B C9B C20B C68B 0.9 . . . . ?
 C9B C8B C69B C63B -147.6 . . . . ?
 C9B C8B C69B C68B -0.6 . . . . ?
 C9B C10B C11B C12B 142.4 . . . . ?
 C9B C10B C11B C18B 0.0 . . . . ?
 C9B C20B C68B C64B 148.7 . . . . ?
 C9B C20B C68B C69B -1.3 . . . . ?
 C10B C4B C5B C6B 139.9 . . . . ?
 C10B C4B C5B C12B -0.2 . . . . ?
 C10B C9B C20B C19B 1.8 . . . . ?
 C10B C9B C20B C68B -140.7 . . . . ?
 C10B C11B C12B C5B -0.5 . . . . ?
 C10B C11B C12B C15B -142.4 . . . . ?
 C10B C11B C18B C17B 137.9 . . . . ?
 C10B C11B C18B C19B 1.4 . . . . ?
 C11B C12B C15B C14B 137.1 . . . . ?
 C11B C12B C15B C16B 0.8 . . . . ?
 C11B C18B C19B C20B -1.3 . . . . ?
 C11B C18B C19B C67B 143.6 . . . . ?
 C12B C5B C6B C1B 137.9 . . . . ?
 C12B C5B C6B C13B 1.5 . . . . ?
 C12B C11B C18B C17B -0.4 . . . . ?
 C12B C11B C18B C19B -136.8 . . . . ?
 C12B C15B C16B C17B -2.3 . . . . ?
 C12B C15B C16B C55B 141.1 . . . . ?
 C13B C14B C15B C12B 0.6 . . . . ?
 C13B C14B C15B C16B 142.0 . . . . ?
 C13B C14B C54B C53B 4.6 . . . . ?
 C13B C14B C54B C55B -141.5 . . . . ?
 C13B C30B C31B C32B 153.7 . . . . ?
 C13B C30B C31B C53B 2.4 . . . . ?
 C14B C13B C30B C27B 141.7 . . . . ?
 C14B C13B C30B C31B -2.8 . . . . ?
 C14B C15B C16B C17B -143.9 . . . . ?
 C14B C15B C16B C55B -0.5 . . . . ?
 C14B C54B C55B C16B -1.8 . . . . ?
 C14B C54B C55B C56B 146.7 . . . . ?
 C15B C14B C54B C53B 147.7 . . . . ?
 C15B C14B C54B C55B 1.6 . . . . ?
 C15B C16B C17B C18B 2.5 . . . . ?
 C15B C16B C17B C66B 138.8 . . . . ?
 C15B C16B C55B C54B 1.5 . . . . ?
 C15B C16B C55B C56B -148.3 . . . . ?
 C16B C17B C18B C11B -1.2 . . . . ?
 C16B C17B C18B C19B 139.3 . . . . ?
 C16B C17B C66B C57B 6.1 . . . . ?
 C16B C17B C66B C67B -143.8 . . . . ?
 C16B C55B C56B C52B 156.0 . . . . ?
 C16B C55B C56B C57B 6.0 . . . . ?
 C17B C16B C55B C54B 144.1 . . . . ?
 C17B C16B C55B C56B -5.7 . . . . ?
 C17B C18B C19B C20B -141.4 . . . . ?
 C17B C18B C19B C67B 3.4 . . . . ?
 C17B C66B C67B C19B 3.3 . . . . ?
 C17B C66B C67B C65B 148.3 . . . . ?
 C18B C11B C12B C5B 142.4 . . . . ?
 C18B C11B C12B C15B 0.5 . . . . ?
 C18B C17B C66B C57B 148.7 . . . . ?
 C18B C17B C66B C67B -1.1 . . . . ?
 C18B C19B C20B C9B -0.3 . . . . ?
 C18B C19B C20B C68B 139.3 . . . . ?
 C18B C19B C67B C65B -148.9 . . . . ?
 C18B C19B C67B C66B -4.2 . . . . ?
 C19B C20B C68B C64B 5.8 . . . . ?
 C19B C20B C68B C69B -144.2 . . . . ?
 C20B C9B C10B C4B 135.5 . . . . ?
 C20B C9B C10B C11B -1.6 . . . . ?
 C20B C19B C67B C65B -5.0 . . . . ?
 C20B C19B C67B C66B 139.8 . . . . ?
 C20B C68B C69B C8B 1.1 . . . . ?
 C20B C68B C69B C63B 148.0 . . . . ?
 C21B C7B C8B C9B 138.7 . . . . ?
 C21B C7B C8B C69B 2.9 . . . . ?
 C21B C22B C23B C24B 12.5 . . . . ?
 C21B C22B C23B C40B 156.3 . . . . ?
 C21B C22B C63B C69B -1.8 . . . . ?
 C21B C22B C63B C70B -152.2 . . . . ?
 C22B C21B C29B C2B -146.5 . . . . ?
 C22B C21B C29B C25B 1.4 . . . . ?
 C22B C23B C24B C25B 0.9 . . . . ?
 C22B C23B C24B C28B 147.0 . . . . ?
 C22B C23B C40B C39B -148.2 . . . . ?
 C22B C23B C40B C41B -2.5 . . . . ?
 C22B C63B C69B C8B 6.5 . . . . ?
 C22B C63B C69B C68B -136.8 . . . . ?
 C22B C63B C70B C41B -3.9 . . . . ?
 C22B C63B C70B C62B 137.7 . . . . ?
 C23B C22B C63B C69B 150.5 . . . . ?
 C23B C22B C63B C70B 0.2 . . . . ?
 C23B C24B C25B C26B 136.4 . . . . ?
 C23B C24B C25B C29B -13.3 . . . . ?
 C23B C24B C28B C34B -140.3 . . . . ?
 C23B C24B C28B C39B 2.6 . . . . ?
 C23B C40B C41B C42B -137.7 . . . . ?
 C23B C40B C41B C70B -1.2 . . . . ?
 C24B C23B C40B C39B -0.1 . . . . ?
 C24B C23B C40B C41B 145.7 . . . . ?
 C24B C25B C26B C27B -151.2 . . . . ?
 C24B C25B C26B C33B 1.6 . . . . ?
 C24B C25B C29B C2B 155.5 . . . . ?
 C24B C25B C29B C21B 12.1 . . . . ?
 C24B C28B C34B C33B -2.0 . . . . ?
 C24B C28B C34B C35B 139.2 . . . . ?
 C24B C28B C39B C38B -141.9 . . . . ?
 C24B C28B C39B C40B -2.7 . . . . ?
 C25B C24B C28B C34B 5.8 . . . . ?
 C25B C24B C28B C39B 148.7 . . . . ?
 C25B C26B C27B C1B -0.8 . . . . ?
 C25B C26B C27B C30B 138.7 . . . . ?
 C25B C26B C33B C32B -138.1 . . . . ?
 C25B C26B C33B C34B 2.1 . . . . ?
 C26B C25B C29B C2B 5.5 . . . . ?
 C26B C25B C29B C21B -137.9 . . . . ?
 C26B C27B C30B C13B -143.6 . . . . ?
 C26B C27B C30B C31B 1.1 . . . . ?
 C26B C33B C34B C28B -1.9 . . . . ?
 C26B C33B C34B C35B -146.4 . . . . ?
 C27B C1B C2B C3B 139.8 . . . . ?
 C27B C1B C2B C29B 4.4 . . . . ?
 C27B C1B C6B C5B -145.5 . . . . ?
 C27B C1B C6B C13B -3.5 . . . . ?
 C27B C26B C33B C32B 16.0 . . . . ?
 C27B C26B C33B C34B 156.1 . . . . ?
 C27B C30B C31B C32B 12.9 . . . . ?
 C27B C30B C31B C53B -138.4 . . . . ?
 C28B C24B C25B C26B -5.5 . . . . ?
 C28B C24B C25B C29B -155.1 . . . . ?
 C28B C34B C35B C36B -144.7 . . . . ?
 C28B C34B C35B C37B -1.2 . . . . ?
 C28B C39B C40B C23B 1.7 . . . . ?
 C28B C39B C40B C41B -142.6 . . . . ?
 C29B C2B C3B C4B 143.7 . . . . ?
 C29B C2B C3B C7B 1.6 . . . . ?
 C29B C21B C22B C23B -13.6 . . . . ?
 C29B C21B C22B C63B 139.3 . . . . ?
 C29B C25B C26B C27B -1.7 . . . . ?
 C29B C25B C26B C33B 151.2 . . . . ?
 C30B C13B C14B C15B -139.4 . . . . ?
 C30B C13B C14B C54B -0.7 . . . . ?
 C30B C31B C32B C33B -12.2 . . . . ?
 C30B C31B C32B C36B -155.7 . . . . ?
 C30B C31B C53B C51B 151.4 . . . . ?
 C30B C31B C53B C54B 1.4 . . . . ?
 C31B C32B C33B C26B -2.5 . . . . ?
 C31B C32B C33B C34B -146.8 . . . . ?
 C31B C32B C36B C35B 146.1 . . . . ?
 C31B C32B C36B C50B 5.2 . . . . ?
 C31B C53B C54B C14B -4.9 . . . . ?
 C31B C53B C54B C55B 137.1 . . . . ?
 C32B C31B C53B C51B 0.5 . . . . ?
 C32B C31B C53B C54B -149.4 . . . . ?
 C32B C33B C34B C28B 142.9 . . . . ?
 C32B C33B C34B C35B -1.7 . . . . ?
 C32B C36B C50B C48B 139.5 . . . . ?
 C32B C36B C50B C51B -1.8 . . . . ?
 C33B C26B C27B C1B -154.7 . . . . ?
 C33B C26B C27B C30B -15.3 . . . . ?
 C33B C32B C36B C35B -2.0 . . . . ?
 C33B C32B C36B C50B -142.9 . . . . ?
 C33B C34B C35B C36B 0.5 . . . . ?
 C33B C34B C35B C37B 144.0 . . . . ?
 C34B C28B C39B C38B 1.0 . . . . ?
 C34B C28B C39B C40B 140.2 . . . . ?
 C34B C35B C36B C32B 0.9 . . . . ?
 C34B C35B C36B C50B 142.1 . . . . ?
 C34B C35B C37B C38B 0.4 . . . . ?
 C34B C35B C37B C49B -137.8 . . . . ?
 C35B C36B C50B C48B 1.4 . . . . ?
 C35B C36B C50B C51B -139.9 . . . . ?
 C35B C37B C38B C39B 1.1 . . . . ?
 C35B C37B C38B C43B -141.4 . . . . ?
 C35B C37B C49B C44B 143.2 . . . . ?
 C35B C37B C49B C48B 1.1 . . . . ?
 C36B C32B C33B C26B 146.5 . . . . ?
 C36B C32B C33B C34B 2.2 . . . . ?
 C36B C35B C37B C38B 137.7 . . . . ?
 C36B C35B C37B C49B -0.6 . . . . ?
 C36B C50B C51B C52B 143.5 . . . . ?
 C36B C50B C51B C53B -2.1 . . . . ?
 C37B C35B C36B C32B -141.7 . . . . ?
 C37B C35B C36B C50B -0.6 . . . . ?
 C37B C38B C39B C28B -1.8 . . . . ?
 C37B C38B C39B C40B -137.0 . . . . ?
 C37B C38B C43B C42B 140.2 . . . . ?
 C37B C38B C43B C44B -1.5 . . . . ?
 C38B C37B C49B C44B 0.0 . . . . ?
 C38B C37B C49B C48B -142.1 . . . . ?
 C38B C39B C40B C23B 142.3 . . . . ?
 C38B C39B C40B C41B -2.0 . . . . ?
 C38B C43B C44B C45B 141.7 . . . . ?
 C38B C43B C44B C49B 1.5 . . . . ?
 C39B C28B C34B C33B -140.7 . . . . ?
 C39B C28B C34B C35B 0.5 . . . . ?
 C39B C38B C43B C42B -1.5 . . . . ?
 C39B C38B C43B C44B -143.2 . . . . ?
 C39B C40B C41B C42B 3.0 . . . . ?
 C39B C40B C41B C70B 139.5 . . . . ?
 C40B C23B C24B C25B -147.7 . . . . ?
 C40B C23B C24B C28B -1.6 . . . . ?
 C40B C41B C42B C43B -3.2 . . . . ?
 C40B C41B C42B C61B 141.5 . . . . ?
 C40B C41B C70B C62B -141.5 . . . . ?
 C40B C41B C70B C63B 4.4 . . . . ?
 C41B C42B C43B C38B 2.5 . . . . ?
 C41B C42B C43B C44B 138.7 . . . . ?
 C41B C42B C61B C60B -144.2 . . . . ?
 C41B C42B C61B C62B -0.4 . . . . ?
 C42B C41B C70B C62B -0.8 . . . . ?
 C42B C41B C70B C63B 145.1 . . . . ?
 C42B C43B C44B C45B 0.4 . . . . ?
 C42B C43B C44B C49B -139.8 . . . . ?
 C42B C61B C62B C64B -145.5 . . . . ?
 C42B C61B C62B C70B -0.1 . . . . ?
 C43B C38B C39B C28B 136.4 . . . . ?
 C43B C38B C39B C40B 1.2 . . . . ?
 C43B C42B C61B C60B 0.2 . . . . ?
 C43B C42B C61B C62B 144.0 . . . . ?
 C43B C44B C45B C46B -138.2 . . . . ?
 C43B C44B C45B C60B 0.9 . . . . ?
 C43B C44B C49B C37B -1.0 . . . . ?
 C43B C44B C49B C48B 139.5 . . . . ?
 C44B C45B C46B C47B 1.8 . . . . ?
 C44B C45B C46B C58B 144.9 . . . . ?
 C44B C45B C60B C59B -143.2 . . . . ?
 C44B C45B C60B C61B -1.8 . . . . ?
 C45B C44B C49B C37B -140.5 . . . . ?
 C45B C44B C49B C48B 0.0 . . . . ?
 C45B C46B C47B C48B -0.4 . . . . ?
 C45B C46B C47B C52B 136.5 . . . . ?
 C45B C46B C58B C57B -145.8 . . . . ?
 C45B C46B C58B C59B -1.8 . . . . ?
 C45B C60B C61B C42B 1.2 . . . . ?
 C45B C60B C61B C62B -138.7 . . . . ?
 C46B C45B C60B C59B -0.8 . . . . ?
 C46B C45B C60B C61B 140.6 . . . . ?
 C46B C47B C48B C49B -1.3 . . . . ?
 C46B C47B C48B C50B 142.6 . . . . ?
 C46B C47B C52B C51B -141.4 . . . . ?
 C46B C47B C52B C56B 6.8 . . . . ?
 C46B C58B C59B C60B 1.3 . . . . ?
 C46B C58B C59B C65B -148.0 . . . . ?
 C47B C46B C58B C57B -0.1 . . . . ?
 C47B C46B C58B C59B 143.9 . . . . ?
 C47B C48B C49B C37B 137.6 . . . . ?
 C47B C48B C49B C44B 1.4 . . . . ?
 C47B C48B C50B C36B -143.2 . . . . ?
 C47B C48B C50B C51B 0.4 . . . . ?
 C47B C52B C56B C55B -156.0 . . . . ?
 C47B C52B C56B C57B -5.6 . . . . ?
 C48B C47B C52B C51B -0.3 . . . . ?
 C48B C47B C52B C56B 147.9 . . . . ?
 C48B C50B C51B C52B -0.6 . . . . ?
 C48B C50B C51B C53B -146.2 . . . . ?
 C49B C37B C38B C39B 143.4 . . . . ?
 C49B C37B C38B C43B 0.9 . . . . ?
 C49B C44B C45B C46B -1.6 . . . . ?
 C49B C44B C45B C60B 137.5 . . . . ?
 C49B C48B C50B C36B -0.9 . . . . ?
 C49B C48B C50B C51B 142.7 . . . . ?
 C50B C48B C49B C37B -0.3 . . . . ?
 C50B C48B C49B C44B -136.5 . . . . ?
 C50B C51B C52B C47B 0.5 . . . . ?
 C50B C51B C52B C56B -148.4 . . . . ?
 C50B C51B C53B C31B 2.7 . . . . ?
 C50B C51B C53B C54B 153.3 . . . . ?
 C51B C52B C56B C55B -10.7 . . . . ?
 C51B C52B C56B C57B 139.7 . . . . ?
 C51B C53B C54B C14B -154.7 . . . . ?
 C51B C53B C54B C55B -12.7 . . . . ?
 C52B C47B C48B C49B -144.0 . . . . ?
 C52B C47B C48B C50B -0.1 . . . . ?
 C52B C51B C53B C31B -137.7 . . . . ?
 C52B C51B C53B C54B 12.9 . . . . ?
 C52B C56B C57B C58B 1.7 . . . . ?
 C52B C56B C57B C66B -149.6 . . . . ?
 C53B C31B C32B C33B 139.0 . . . . ?
 C53B C31B C32B C36B -4.5 . . . . ?
 C53B C51B C52B C47B 147.7 . . . . ?
 C53B C51B C52B C56B -1.2 . . . . ?
 C53B C54B C55B C16B -148.2 . . . . ?
 C53B C54B C55B C56B 0.4 . . . . ?
 C54B C14B C15B C12B -142.0 . . . . ?
 C54B C14B C15B C16B -0.6 . . . . ?
 C54B C55B C56B C52B 11.3 . . . . ?
 C54B C55B C56B C57B -138.6 . . . . ?
 C55B C16B C17B C18B -136.7 . . . . ?
 C55B C16B C17B C66B -0.4 . . . . ?
 C55B C56B C57B C58B 150.9 . . . . ?
 C55B C56B C57B C66B -0.4 . . . . ?
 C56B C57B C58B C46B 1.1 . . . . ?
 C56B C57B C58B C59B -137.2 . . . . ?
 C56B C57B C66B C17B -5.7 . . . . ?
 C56B C57B C66B C67B 139.8 . . . . ?
 C57B C58B C59B C60B 145.6 . . . . ?
 C57B C58B C59B C65B -3.7 . . . . ?
 C57B C66B C67B C19B -146.3 . . . . ?
 C57B C66B C67B C65B -1.3 . . . . ?
 C58B C46B C47B C48B -140.7 . . . . ?
 C58B C46B C47B C52B -3.8 . . . . ?
 C58B C57B C66B C17B -157.7 . . . . ?
 C58B C57B C66B C67B -12.3 . . . . ?
 C58B C59B C60B C45B -0.4 . . . . ?
 C58B C59B C60B C61B -143.1 . . . . ?
 C58B C59B C65B C64B 139.4 . . . . ?
 C58B C59B C65B C67B -10.1 . . . . ?
 C59B C60B C61B C42B 138.8 . . . . ?
 C59B C60B C61B C62B -1.1 . . . . ?
 C59B C65B C67B C19B 154.1 . . . . ?
 C59B C65B C67B C66B 12.7 . . . . ?
 C60B C45B C46B C47B -141.5 . . . . ?
 C60B C45B C46B C58B 1.6 . . . . ?
 C60B C59B C65B C64B -5.4 . . . . ?
 C60B C59B C65B C67B -155.0 . . . . ?
 C60B C61B C62B C64B -2.5 . . . . ?
 C60B C61B C62B C70B 142.9 . . . . ?
 C61B C42B C43B C38B -137.2 . . . . ?
 C61B C42B C43B C44B -1.0 . . . . ?
 C61B C62B C64B C65B 2.2 . . . . ?
 C61B C62B C64B C68B 153.0 . . . . ?
 C61B C62B C70B C41B 0.6 . . . . ?
 C61B C62B C70B C63B -145.6 . . . . ?
 C62B C64B C65B C59B 1.7 . . . . ?
 C62B C64B C65B C67B 151.2 . . . . ?
 C62B C64B C68B C20B -156.8 . . . . ?
 C62B C64B C68B C69B -11.5 . . . . ?
 C63B C22B C23B C24B -140.8 . . . . ?
 C63B C22B C23B C40B 3.0 . . . . ?
 C64B C62B C70B C41B 146.4 . . . . ?
 C64B C62B C70B C63B 0.2 . . . . ?
 C64B C65B C67B C19B 4.4 . . . . ?
 C64B C65B C67B C66B -137.0 . . . . ?
 C64B C68B C69B C8B -148.9 . . . . ?
 C64B C68B C69B C63B -2.1 . . . . ?
 C65B C59B C60B C45B 148.0 . . . . ?
 C65B C59B C60B C61B 5.2 . . . . ?
 C65B C64B C68B C20B -6.2 . . . . ?
 C65B C64B C68B C69B 139.1 . . . . ?
 C66B C17B C18B C11B -141.9 . . . . ?
 C66B C17B C18B C19B -1.4 . . . . ?
 C66B C57B C58B C46B 153.1 . . . . ?
 C66B C57B C58B C59B 14.8 . . . . ?
 C67B C19B C20B C9B -139.6 . . . . ?
 C67B C19B C20B C68B 0.0 . . . . ?
 C68B C64B C65B C59B -148.5 . . . . ?
 C68B C64B C65B C67B 1.1 . . . . ?
 C69B C8B C9B C10B 143.0 . . . . ?
 C69B C8B C9B C20B -0.2 . . . . ?
 C69B C63B C70B C41B -155.1 . . . . ?
 C69B C63B C70B C62B -13.5 . . . . ?
 C70B C41B C42B C43B -144.1 . . . . ?
 C70B C41B C42B C61B 0.7 . . . . ?
 C70B C62B C64B C65B -138.5 . . . . ?
 C70B C62B C64B C68B 12.3 . . . . ?
 C70B C63B C69B C8B 157.8 . . . . ?
 C70B C63B C69B C68B 14.5 . . . . ?

_shelx_res_file
;
TITL jw1813_a.res in Pa-3
    jw1813.res
    created by SHELXL-2016/6 at 15:45:50 on 31-Oct-2016
REM Old TITL JW1813 in Pa-3 #205
REM SHELXT solution in Pa-3
REM R1 0.725, Rweak 0.072, Alpha 0.063, Orientation as input
REM Formula found by SHELXT: C31 N25 O6 S6
CELL 1.34139 19.504 19.504 19.504 90 90 90
ZERR 4 0.0003 0.0003 0.0003 0 0 0
LATT 1
SYMM 0.5-X,-Y,0.5+Z
SYMM -X,0.5+Y,0.5-Z
SYMM 0.5+X,0.5-Y,-Z
SYMM +Z,+X,+Y
SYMM 0.5+Z,0.5-X,-Y
SYMM 0.5-Z,-X,0.5+Y
SYMM -Z,0.5+X,0.5-Y
SYMM +Y,+Z,+X
SYMM -Y,0.5+Z,0.5-X
SYMM 0.5+Y,0.5-Z,-X
SYMM 0.5-Y,-Z,0.5+X
SFAC C H N S
DISP C 0.014 0.007 57.748
DISP H -0 0 0.648
DISP N 0.025 0.014 110.512
DISP S 0.292 0.425 3241.763
UNIT 451.99 64 48 48
DELU 0.01 0.001
SIMU 0.01 0.002 1.7

L.S. 12
PLAN  5
SIZE 0.06 0.08 0.1
TEMP -173
BOND $H
LIST 4
MORE -1
CONF
fmap 2 53
acta
MERG 2
REM <olex2.extras>
REM <HklSrc "%.\\JW1813.hkl">
REM </olex2.extras>

WGHT    0.097000   10.701400
FVAR       0.23653
S1    4    0.604986    0.236152    0.215642    11.00000    0.03445    0.07288 =
         0.06650    0.05012    0.02782    0.02850
N1    3    0.525188    0.218728    0.201345    11.00000    0.03979    0.04693 =
         0.04645    0.02913    0.02452    0.02274
N2    3    0.598870    0.293809    0.274777    11.00000    0.02346    0.07063 =
         0.06391    0.04460    0.00954    0.00960
C1    1    0.312840    0.312840    0.312840    10.33333    0.02114    0.02114 =
         0.02114    0.00216    0.00216    0.00216
AFIX  13
H1    2    0.283239    0.283238    0.283238    10.33333   -1.20000
AFIX   0
C2    1    0.389175    0.303976    0.297875    11.00000    0.02136    0.02299 =
         0.02446    0.00697    0.00260    0.00260
C3    1    0.416297    0.260709    0.249956    11.00000    0.02784    0.02499 =
         0.02686    0.01052    0.00823    0.00764
AFIX  43
H3    2    0.387894    0.233112    0.221598    11.00000   -1.20000
AFIX   0
C4    1    0.489054    0.258837    0.244427    11.00000    0.02899    0.03461 =
         0.03574    0.02214    0.01316    0.01306
C5    1    0.531139    0.301905    0.286694    11.00000    0.02198    0.04813 =
         0.04766    0.03044    0.00487    0.00550
C6    1    0.501663    0.346479    0.335418    11.00000    0.02460    0.04636 =
         0.04616    0.01580   -0.00504   -0.00447
AFIX  43
H6    2    0.529216    0.375251    0.363446    11.00000   -1.20000
AFIX   0
C7    1    0.431533    0.346522    0.340617    11.00000    0.02468    0.03318 =
         0.03379    0.00642   -0.00293   -0.00237
C8    1    0.390087    0.390087    0.390087    10.33333    0.03519    0.03519 =
         0.03519   -0.00525   -0.00525   -0.00525
AFIX  13
H8    2    0.419689    0.419689    0.419689    10.33333   -1.20000
AFIX   0

C9    1    0.511074    0.106051    0.094971    10.50000    0.06239    0.04922 =
         0.04487    0.00819   -0.00965    0.00293
S2    4    0.456726    0.063297    0.144050    11.00000    0.07551    0.09049 =
         0.05422    0.01600   -0.02242   -0.02683
PART -1
AFIX   6
C1A   1    0.542269   -0.164401    0.602269    10.08333    0.02930    0.02090 =
         0.03145    0.01303   -0.00414    0.00413
C2A   1    0.566910   -0.116966    0.646458    10.08333    0.03232    0.02845 =
         0.02733    0.01188   -0.01008    0.00249
C3A   1    0.520283   -0.077177    0.689132    10.08333    0.03601    0.03427 =
         0.02333    0.00786   -0.00817   -0.00092
C4A   1    0.447987   -0.092555    0.684579    10.08333    0.03804    0.03791 =
         0.02214    0.01020    0.00211   -0.00313
C5A   1    0.426216   -0.144269    0.639381    10.08333    0.03086    0.02929 =
         0.02601    0.01413    0.00557   -0.00954
C6A   1    0.469812   -0.180778    0.596716    10.08333    0.03243    0.02087 =
         0.03470    0.01179    0.00033   -0.00476
C7A   1    0.541298   -0.009282    0.692957    10.08333    0.03557    0.03743 =
         0.02341    0.00114   -0.01020    0.00075
C8A   1    0.496776    0.044288    0.693108    10.08333    0.03794    0.03673 =
         0.02330   -0.00870   -0.00162    0.00281
C9A   1    0.423019    0.030490    0.687714    10.08333    0.03492    0.04170 =
         0.02341   -0.00830    0.00583    0.00314
C10A  1    0.400564   -0.037456    0.684559    10.08333    0.03361    0.04481 =
         0.02385    0.00216    0.00900   -0.00035
C11A  1    0.346196   -0.054298    0.637396    10.08333    0.02193    0.04433 =
         0.03131    0.00270    0.01210   -0.00478
C12A  1    0.360279   -0.119140    0.609409    10.08333    0.02473    0.03618 =
         0.03459    0.00876    0.00706   -0.00905
C13A  1    0.454022   -0.193257    0.525480    10.08333    0.03187    0.01532 =
         0.03787    0.00070   -0.00032   -0.00541
C14A  1    0.394105   -0.170706    0.498138    10.08333    0.02754    0.02038 =
         0.04223   -0.00310   -0.00476   -0.00722
C15A  1    0.345659   -0.133398    0.539882    10.08333    0.02097    0.03175 =
         0.04032    0.00259   -0.00088   -0.01029
C16A  1    0.316755   -0.080634    0.496343    10.08333    0.01392    0.03702 =
         0.03722   -0.00185   -0.00191   -0.00343
C17A  1    0.301832   -0.018222    0.524620    10.08333    0.01370    0.04142 =
         0.03826   -0.00355    0.00298    0.00368
C18A  1    0.316152   -0.002054    0.594786    10.08333    0.01869    0.04340 =
         0.03444   -0.00234    0.01003    0.00338
C19A  1    0.342326    0.067603    0.598930    10.08333    0.02521    0.03908 =
         0.03472   -0.00731    0.00732    0.00952
C20A  1    0.395075    0.083595    0.644604    10.08333    0.03177    0.03635 =
         0.03085   -0.01129    0.00718    0.00914
C21A  1    0.604355   -0.003796    0.654212    10.08333    0.02514    0.03262 =
         0.02727    0.00017   -0.01302    0.00022
C22A  1    0.621049    0.057820    0.618129    10.08333    0.02627    0.03105 =
         0.03443   -0.00511   -0.01079   -0.00319
C23A  1    0.666238    0.050689    0.561738    10.08333    0.01768    0.03046 =
         0.04171    0.00099   -0.00856   -0.00394
C24A  1    0.682512   -0.015113    0.534001    10.08333    0.01446    0.03209 =
         0.04259    0.00167   -0.00507    0.00143
C25A  1    0.653127   -0.075564    0.561675    10.08333    0.01827    0.02787 =
         0.03651    0.00548   -0.00696    0.00794
C26A  1    0.627796   -0.127970    0.514037    10.08333    0.02041    0.02146 =
         0.03682    0.00425    0.00018    0.00925
C27A  1    0.573637   -0.170898    0.533569    10.08333    0.02648    0.01689 =
         0.03733    0.00567   -0.00123    0.00920
C28A  1    0.693086   -0.007516    0.461039    10.08333    0.01078    0.03542 =
         0.04487    0.00506    0.00436    0.00358
C29A  1    0.619868   -0.069838    0.625246    10.08333    0.02715    0.03203 =
         0.03038    0.00546   -0.01238    0.00278
C30A  1    0.518309   -0.189230    0.487086    10.08333    0.03108    0.01582 =
         0.03568    0.00116   -0.00152    0.00294
C31A  1    0.518770   -0.164375    0.418960    10.08333    0.03192    0.01845 =
         0.03196   -0.00634    0.00130    0.00683
C32A  1    0.580342   -0.134566    0.395351    10.08333    0.02825    0.02131 =
         0.03260   -0.00234    0.00461    0.01111
C33A  1    0.634830   -0.117684    0.441565    10.08333    0.02472    0.02609 =
         0.03648    0.00003    0.00525    0.01072
C34A  1    0.668556   -0.057561    0.416031    10.08333    0.01890    0.03400 =
         0.03749    0.00251    0.01013    0.00800
C35A  1    0.637108   -0.036762    0.352278    10.08333    0.02268    0.03232 =
         0.03140   -0.00028    0.01570    0.00975
C36A  1    0.583648   -0.085077    0.340370    10.08333    0.03132    0.03203 =
         0.02841   -0.00411    0.00833    0.01061
C37A  1    0.630201    0.031773    0.336374    10.08333    0.02536    0.03772 =
         0.03151    0.00619    0.01571    0.00575
C38A  1    0.654342    0.084088    0.382281    10.08333    0.02135    0.03058 =
         0.04154    0.01009    0.01464   -0.00390
C39A  1    0.686349    0.063889    0.443714    10.08333    0.01327    0.03611 =
         0.04818    0.00601    0.00630   -0.00517
C40A  1    0.668524    0.100057    0.505207    10.08333    0.01874    0.03014 =
         0.04797    0.00275   -0.00467   -0.00697
C41A  1    0.624052    0.153457    0.505458    10.08333    0.02541    0.02333 =
         0.05103    0.00102   -0.00553   -0.00616
C42A  1    0.591025    0.172607    0.442626    10.08333    0.02957    0.02004 =
         0.05008    0.00642    0.00306   -0.00142
C43A  1    0.606869    0.139688    0.382182    10.08333    0.03062    0.02666 =
         0.04367    0.01152    0.01126   -0.00198
C44A  1    0.553381    0.121585    0.333609    10.08333    0.03768    0.02917 =
         0.03327    0.01431    0.00886    0.00572
C45A  1    0.483458    0.140043    0.351178    10.08333    0.03579    0.02946 =
         0.03291    0.01180    0.00221    0.01257
C46A  1    0.431528    0.092739    0.338201    10.08333    0.03281    0.03396 =
         0.03006    0.00767   -0.00489    0.01354
C47A  1    0.443371    0.028706    0.311243    10.08333    0.03073    0.03877 =
         0.02230    0.00405   -0.00421    0.01248
C48A  1    0.514695    0.009128    0.294834    10.08333    0.03654    0.03952 =
         0.02056    0.00016    0.00091    0.01001
C49A  1    0.566294    0.055822    0.305742    10.08333    0.03361    0.03798 =
         0.02702    0.00767    0.00962    0.00871
C50A  1    0.521131   -0.060827    0.311768    10.08333    0.03461    0.03412 =
         0.02250   -0.00466   -0.00027    0.01152
C51A  1    0.456989   -0.088996    0.338257    10.08333    0.03198    0.03147 =
         0.02614   -0.00921   -0.00533    0.00752
C52A  1    0.409976   -0.031576    0.337608    10.08333    0.02779    0.03589 =
         0.02495   -0.00259   -0.01014    0.00822
C53A  1    0.452533   -0.139866    0.388728    10.08333    0.03039    0.02252 =
         0.03201   -0.00914   -0.00751    0.00289
C54A  1    0.393905   -0.140841    0.428401    10.08333    0.02812    0.02463 =
         0.03699   -0.00826   -0.00582   -0.00041
C55A  1    0.347932   -0.085242    0.427622    10.08333    0.02246    0.03374 =
         0.03101   -0.00738   -0.00910   -0.00038
C56A  1    0.357037   -0.027268    0.388249    10.08333    0.02143    0.03481 =
         0.02813   -0.00276   -0.00811    0.00585
C57A  1    0.341863    0.040275    0.417746    10.08333    0.02002    0.03592 =
         0.03131   -0.00005   -0.00890    0.01042
C58A  1    0.378699    0.098118    0.393552    10.08333    0.02532    0.03044 =
         0.03065    0.00611   -0.00532    0.01573
C59A  1    0.404230    0.149054    0.439420    10.08333    0.02477    0.02438 =
         0.03635    0.00706   -0.00167    0.01517
C60A  1    0.469163    0.175013    0.412701    10.08333    0.03266    0.02293 =
         0.03956    0.00816   -0.00063    0.01262
C61A  1    0.521331    0.191425    0.459535    10.08333    0.03148    0.01717 =
         0.04638    0.00391    0.00102    0.00613
C62A  1    0.510177    0.183667    0.532647    10.08333    0.03460    0.01781 =
         0.04276   -0.00829   -0.00157    0.00390
C63A  1    0.573927    0.113610    0.618009    10.08333    0.03183    0.02213 =
         0.03903   -0.00992   -0.00843   -0.00396
C64A  1    0.446463    0.162169    0.559785    10.08333    0.03182    0.02228 =
         0.03710   -0.01029    0.00190    0.01028
C65A  1    0.389794    0.144795    0.510091    10.08333    0.02582    0.02683 =
         0.03852   -0.00427    0.00131    0.01395
C66A  1    0.317986    0.043784    0.484856    10.08333    0.01487    0.03686 =
         0.03577   -0.00156    0.00048    0.01017
C67A  1    0.339927    0.094958    0.531474    10.08333    0.01915    0.03420 =
         0.03613   -0.00425    0.00665    0.01313
C68A  1    0.448263    0.129132    0.622042    10.08333    0.03536    0.02638 =
         0.03293   -0.01348    0.00102    0.00826
C69A  1    0.510330    0.105673    0.652354    10.08333    0.03663    0.02662 =
         0.03336   -0.01152   -0.00472    0.00148
C70A  1    0.573784    0.159598    0.561669    10.08333    0.03158    0.02338 =
         0.04453   -0.00624   -0.00680   -0.00340
AFIX   6
PART 0
PART -2
C1B   1    0.492843   -0.196335    0.516093    10.08333    0.03112    0.01265 =
         0.03476    0.00307   -0.00056    0.00015
C2B   1    0.533405   -0.182733    0.570756    10.08333    0.02832    0.01481 =
         0.03178    0.01124   -0.00148    0.00257
C3B   1    0.504111   -0.155426    0.633759    10.08333    0.02998    0.02297 =
         0.02556    0.01486   -0.00153   -0.00237
C4B   1    0.430644   -0.146575    0.636449    10.08333    0.02923    0.02692 =
         0.02411    0.01295    0.00458   -0.00814
C5B   1    0.391408   -0.164078    0.578619    10.08333    0.02613    0.02473 =
         0.03310    0.00628    0.00274   -0.01094
C6B   1    0.418868   -0.187805    0.517502    10.08333    0.02813    0.01283 =
         0.03435    0.00196   -0.00055   -0.01022
C7B   1    0.546303   -0.105297    0.661445    10.08333    0.02875    0.02667 =
         0.02216    0.01312   -0.00649   -0.00063
C8B   1    0.521757   -0.047604    0.691955    10.08333    0.03127    0.03419 =
         0.01819    0.00732   -0.00381   -0.00400
C9B   1    0.447389   -0.036664    0.694823    10.08333    0.03136    0.03738 =
         0.01869    0.00325    0.00734   -0.00550
C10B  1    0.403857   -0.086683    0.667837    10.08333    0.02792    0.03714 =
         0.02067    0.00663    0.00892   -0.00742
C11B  1    0.345185   -0.064797    0.628640    10.08333    0.02189    0.03986 =
         0.02810    0.00349    0.01099   -0.00432
C12B  1    0.336152   -0.111091    0.574268    10.08333    0.01610    0.03472 =
         0.03068    0.00587    0.00738   -0.01072
C13B  1    0.397053   -0.161943    0.451702    10.08333    0.02757    0.01989 =
         0.03223   -0.00401   -0.00381   -0.00630
C14B  1    0.346690   -0.114033    0.447558    10.08333    0.01871    0.03010 =
         0.02910   -0.00312   -0.00471   -0.00743
C15B  1    0.314908   -0.087808    0.509080    10.08333    0.01312    0.03532 =
         0.03386    0.00196    0.00287   -0.00791
C16B  1    0.303057   -0.015451    0.497392    10.08333    0.00872    0.03799 =
         0.03350    0.00091    0.00115    0.00200
C17B  1    0.310501    0.028922    0.551174    10.08333    0.01434    0.03911 =
         0.03466   -0.00192    0.00592    0.00724
C18B  1    0.332103    0.006990    0.617842    10.08333    0.02146    0.04355 =
         0.03020   -0.00433    0.00963    0.00406
C19B  1    0.379824    0.057112    0.645671    10.08333    0.02697    0.03728 =
         0.02573   -0.01091    0.01133    0.00653
C20B  1    0.436657    0.035594    0.683436    10.08333    0.03113    0.03691 =
         0.02021   -0.00771    0.00827   -0.00006
C21B  1    0.606053   -0.100447    0.617817    10.08333    0.02052    0.02315 =
         0.02793    0.01464   -0.00921    0.00402
C22B  1    0.640554   -0.036453    0.608099    10.08333    0.01461    0.02786 =
         0.02731    0.00724   -0.01090    0.00098
C23B  1    0.678557   -0.029525    0.546705    10.08333    0.00982    0.02824 =
         0.03544    0.00864   -0.00417    0.00231
C24B  1    0.671376   -0.077338    0.491745    10.08333    0.01341    0.02340 =
         0.03635    0.00847    0.00472    0.00728
C25B  1    0.624943   -0.133102    0.496649    10.08333    0.02143    0.01649 =
         0.03643    0.00709    0.00264    0.00843
C26B  1    0.581977   -0.149118    0.437015    10.08333    0.02732    0.01596 =
         0.03193   -0.00080    0.00391    0.00903
C27B  1    0.517617   -0.179458    0.446462    10.08333    0.03128    0.01087 =
         0.03020   -0.00068    0.00221    0.00395
C28B  1    0.680864   -0.040857    0.427872    10.08333    0.01107    0.02623 =
         0.03706    0.00449    0.01128    0.00621
C29B  1    0.597972   -0.147712    0.561767    10.08333    0.02313    0.01461 =
         0.03312    0.01319   -0.00198    0.00565
C30B  1    0.457525   -0.158893    0.407446    10.08333    0.03116    0.01722 =
         0.02713   -0.00684   -0.00048   -0.00008
C31B  1    0.463365   -0.107157    0.356913    10.08333    0.02844    0.02346 =
         0.01976   -0.00680   -0.00360    0.00375
C32B  1    0.530269   -0.088160    0.337113    10.08333    0.03096    0.02576 =
         0.02073   -0.00430    0.00447    0.00600
C33B  1    0.589112   -0.109637    0.375399    10.08333    0.02421    0.01990 =
         0.02710   -0.00464    0.00995    0.00871
C34B  1    0.639535   -0.056361    0.371479    10.08333    0.01976    0.02918 =
         0.02931    0.00239    0.01344    0.01195
C35B  1    0.614117   -0.001258    0.328950    10.08333    0.02426    0.03225 =
         0.02534    0.00688    0.01662    0.00775
C36B  1    0.547344   -0.022306    0.307981    10.08333    0.03033    0.03324 =
         0.01683   -0.00022    0.00682    0.00832
C37B  1    0.629377    0.065989    0.344466    10.08333    0.02268    0.03161 =
         0.03249    0.01254    0.01508    0.00210
C38B  1    0.671064    0.083054    0.402718    10.08333    0.01233    0.02853 =
         0.04245    0.01481    0.01277   -0.00205
C39B  1    0.697193    0.029420    0.443247    10.08333    0.00585    0.02929 =
         0.04325    0.01062    0.01153    0.00056
C40B  1    0.694663    0.037328    0.516331    10.08333    0.00730    0.03064 =
         0.04032    0.00496   -0.00277   -0.00528
C41B  1    0.670148    0.094731    0.546741    10.08333    0.01873    0.02664 =
         0.04099    0.00279   -0.00453   -0.01095
C42B  1    0.642730    0.148443    0.504722    10.08333    0.02491    0.02370 =
         0.04469    0.00602   -0.00123   -0.00866
C43B  1    0.644376    0.143366    0.434246    10.08335    0.02166    0.02260 =
         0.04643    0.01158    0.00432   -0.00404
C44B  1    0.586085    0.164601    0.393180    10.08335    0.02914    0.01939 =
         0.04153    0.01636    0.00529    0.00132
C45B  1    0.526793    0.191618    0.429181    10.08335    0.03025    0.01634 =
         0.04209    0.00868   -0.00053    0.00491
C46B  1    0.461791    0.171590    0.407402    10.08335    0.02888    0.02231 =
         0.03748    0.00886   -0.00106    0.00982
C47B  1    0.450956    0.126085    0.354678    10.08333    0.02739    0.02827 =
         0.02968    0.01216   -0.00306    0.00789
C48B  1    0.511209    0.097200    0.318989    10.08333    0.03048    0.03007 =
         0.02748    0.01346    0.00439    0.00728
C49B  1    0.575683    0.117766    0.338707    10.08333    0.02956    0.02813 =
         0.03229    0.01520    0.00739    0.00495
C50B  1    0.495139    0.028373    0.303854    10.08333    0.03064    0.03484 =
         0.02002    0.00875    0.00110    0.00721
C51B  1    0.426471    0.010187    0.327512    10.08333    0.02478    0.03274 =
         0.01734    0.00669   -0.00587    0.00671
C52B  1    0.400733    0.072220    0.359229    10.08333    0.02220    0.03236 =
         0.02378    0.00948   -0.00585    0.00823
C53B  1    0.407569   -0.054530    0.352152    10.08333    0.02486    0.03274 =
         0.01888   -0.00043   -0.00695    0.00167
C54B  1    0.353486   -0.057156    0.397742    10.08333    0.01753    0.03313 =
         0.02423   -0.00047   -0.00667   -0.00082
C55B  1    0.328249    0.003076    0.428501    10.08333    0.01286    0.03599 =
         0.02903    0.00349   -0.00576    0.00341
C56B  1    0.354282    0.067604    0.415786    10.08333    0.01581    0.03099 =
         0.02992    0.00616   -0.00520    0.01047
C57B  1    0.363162    0.115770    0.472867    10.08333    0.01849    0.02859 =
         0.03525    0.00175   -0.00081    0.01349
C58B  1    0.415877    0.165727    0.468600    10.08335    0.02535    0.02220 =
         0.04050    0.00185   -0.00042    0.01324
C59B  1    0.458435    0.181221    0.525944    10.08335    0.03200    0.01905 =
         0.03987   -0.00556    0.00104    0.00850
C60B  1    0.527205    0.197526    0.501148    10.08335    0.03358    0.01789 =
         0.04431   -0.00147   -0.00093    0.00061
C61B  1    0.583688    0.175949    0.540192    10.08333    0.03190    0.01933 =
         0.04076   -0.00140   -0.00410   -0.00717
C62B  1    0.573579    0.139447    0.604214    10.08333    0.03222    0.02050 =
         0.03604   -0.00648   -0.00306   -0.00725
C63B  1    0.614297    0.023919    0.639697    10.08333    0.02190    0.02958 =
         0.02334    0.00047   -0.01026   -0.00607
C64B  1    0.507456    0.126545    0.631091    10.08333    0.03366    0.02183 =
         0.02937   -0.01111    0.00027   -0.00033
C65B  1    0.446264    0.149699    0.589832    10.08333    0.03289    0.02118 =
         0.03337   -0.01345    0.00391    0.00709
C66B  1    0.344514    0.095044    0.538504    10.08333    0.01763    0.03204 =
         0.03669   -0.00564    0.00504    0.01261
C67B  1    0.383770    0.111428    0.597265    10.08333    0.02655    0.03238 =
         0.03120   -0.01135    0.00792    0.01095
C68B  1    0.500896    0.069844    0.672536    10.08333    0.03370    0.02810 =
         0.02148   -0.01023    0.00196   -0.00363
C69B  1    0.553050    0.019186    0.678563    10.08333    0.02848    0.03125 =
         0.01891   -0.00124   -0.00520   -0.00556
C70B  1    0.626924    0.088470    0.608552    10.08333    0.02260    0.02513 =
         0.03123   -0.00330   -0.00807   -0.01029
AFIX   0
HKLF 4


REM  jw1813_a.res in Pa-3
REM R1 =  0.0641 for    2584 Fo > 4sig(Fo)  and  0.0686 for all    2853 data
REM    958 parameters refined using   3396 restraints

END

WGHT      0.1051     15.1513

REM Highest difference peak  0.839,  deepest hole -0.563,  1-sigma level  0.076
Q1    1   0.4576  0.0416  0.1004  11.00000  0.05    0.84
Q2    1   0.3594  0.0611  0.3966  11.00000  0.05    0.48
Q3    1   0.3999  0.2790  0.2773  11.00000  0.05    0.43
Q4    1   0.5140  0.1959  0.4388  11.00000  0.05    0.38
Q5    1   0.5734  0.2207  0.2039  11.00000  0.05    0.36
;
_shelx_res_checksum               68641
_shelx_hkl_file
;
  -1   0   0   -0.50    0.60
   0  -1   0   -0.50    0.60
   0   0  -1   -0.10    0.40
   0   1   0   -0.30    0.70
   1   0   0   -1.20    0.60
  -1   0  -1   -1.40    0.60
  -1   0   1   -2.10    1.00
  -1   1   0   -1.00    0.80
   0  -1  -1   -1.80    0.70
   0  -1  -1   -1.80    0.10
   0  -1   1   -1.00    0.70
   0   1  -1   -1.60    0.10
   0   1  -1   -1.60    0.90
   0   1   1   -1.80    0.60
   1  -1   0   -1.70    1.00
   1   0  -1   -1.40    1.00
   1   0   1   -2.10    0.50
   1   1   0   -0.60    1.00
  -1  -1  -1 3506.25   91.39
   1  -1   1 3247.38   91.89
   1   1  -1 3447.86   92.09
  -1   1   1 3308.67   92.09
   1  -1  -1 3312.37   92.09
  -1  -1   1 3423.06   92.09
  -1   1  -1 3446.96   91.99
   1   1   1 3359.16   91.39
  -2   0   0   74.39    3.30
  -2   0   0   68.89    2.00
   0  -2   0   70.39    3.20
   0   0  -2   75.99    2.80
   0   0  -2   76.09    2.90
   0   2   0   75.89    3.60
   2   0   0   72.99    3.50
   2  -1   0   28.00    2.90
   2   1   0   33.00    2.70
   0  -2   1   30.80    2.80
   0   2  -1   28.60    2.90
   0   2   1   26.70    2.70
   1   0   2   30.40    1.60
  -1   0  -2   28.40    1.70
  -2   1   0   24.20    2.90
  -2   1   0   27.90    1.10
  -2  -1   0   30.70    2.80
   1  -2   0  -11.50    1.60
   2   0  -1   -9.80    1.60
   2   0   1   -9.00    1.10
   1   2   0   -9.40    1.50
   0   1  -2   -9.60    1.20
   0   1   2   -9.30    0.90
   0  -1   2   -8.70    1.30
  -2   0   1  -10.80    1.70
  -1  -2   0   -8.80    1.30
  -1   2   0   -9.80    1.30
   0  -1  -2   -9.70    1.00
  -2   0  -1   -9.00    1.10
  -2   0  -1   -9.20    0.20
  -2  -1  -1  261.97    7.50
   2  -1   1  275.07    7.50
   2   1  -1  265.47    9.40
  -2   1   1  266.77    9.10
  -1  -2  -1  270.07    8.50
   1   2  -1  248.18    7.40
   2  -1   1  272.97    8.80
   1   2  -1  251.27    7.50
   1  -1   2  257.57    8.50
  -1   1   2  255.57    8.80
   1   2  -1  250.57    8.80
  -1   2   1  254.97    9.00
   1   1  -2  265.77    8.80
   1  -2   1  264.27    9.10
  -1   1  -2  244.68    7.50
   1  -2  -1  261.27    8.90
   1   1   2  271.87    7.50
  -1  -2   1  262.77    8.90
  -1   2  -1  258.17    9.10
  -1   1  -2  268.07    8.60
   1   2   1  249.58    8.40
   2  -1  -1  262.37    9.10
  -1   1  -2  246.38    7.50
  -2  -1   1  257.17    9.00
  -2   1  -1  268.87    8.90
   2   1   1  257.67    8.40
   2   1   1  258.57    7.50
  -2   0  -2 1462.15   40.00
  -2   0   2 1492.95   41.20
  -2   2   0 1485.45   41.20
   0  -2  -2 1410.16   40.30
   0  -2   2 1421.46   40.80
   0   2  -2 1458.85   40.90
   0   2  -2 1442.96   39.30
   0   2   2 1452.75   40.40
   2  -2   0 1439.36   41.10
   2   0  -2 1464.25   41.10
   2   0   2 1488.05   40.00
   2   2   0 1468.05   40.80
  -2  -2  -1  -11.40    1.50
  -2  -2  -1  -10.70    0.20
   2   2  -1  -10.80    0.10
  -2  -1  -2  -11.00    0.20
   2   2  -1  -10.70    0.10
   2  -1   2  -10.90    1.50
   2   1  -2  -10.90    1.60
  -2   1   2   -9.20    2.20
   1   2  -2  -11.40    1.50
  -2   2   1  -10.50    1.80
  -1  -2  -2  -11.80    1.10
  -1  -2  -2  -10.90    0.20
   2   2  -1  -12.60    2.00
   2  -2   1   -8.40    1.90
   1  -2   2   -9.30    1.70
   1   2  -2  -10.50    0.20
  -1   2   2   -9.90    1.90
  -1   2   2  -10.60    0.10
   1   2  -2  -10.80    0.20
  -1   2  -2   -9.10    1.90
  -1  -2   2  -11.80    1.80
  -1   2  -2   -9.80    0.30
   1   2   2   -9.00    1.10
   1   2   2  -10.90    0.20
   2  -2  -1  -12.50    2.00
  -1   2  -2  -10.20    0.20
   2  -1  -2  -10.30    2.10
  -2   1  -2  -11.40    1.50
  -2   1  -2  -10.50    0.20
   2   1   2  -11.00    0.90
   2   1   2  -10.90    0.20
  -2  -2   1   -9.40    1.90
  -2   2  -1  -12.10    2.20
  -2   1  -2  -10.70    0.20
   2   2   1  -10.80    1.30
  -2  -2  -2 1877.61   51.59
   2   2  -2 1861.41   52.79
  -2   2   2 1943.51   53.09
   2  -2   2 1844.72   52.59
   2  -2  -2 1855.11   52.89
  -2   2  -2 1881.51   52.69
   2   2   2 1935.71   51.59
  -3   0   0   -0.20    2.10
  -3   0   0   -0.30    0.20
   0  -3   0    0.60    1.50
   0   0  -3    2.50    1.30
   0   0  -3    0.20    1.40
   0   3   0   -2.70    2.20
   3   0   0    0.60    2.10
   1   0   3  -10.80    0.90
   3  -1   0  -12.80    2.00
   3  -1   0  -10.20    0.20
   3   1   0  -10.50    2.00
  -1   0   3  -10.90    1.70
   0  -3   1   -9.90    2.10
   0   3  -1  -11.60    1.80
   0   3   1  -13.20    1.90
   1   0  -3   -8.70    1.80
  -3   1   0  -10.20    0.20
  -1   0  -3   -9.40    1.00
  -3   1   0  -12.30    1.80
  -3  -1   0  -10.80    2.10
  -2   0  -3   -0.50    1.10
  -2   0  -3    0.50    0.20
   0  -3  -2    1.00    2.20
   0  -3  -2    0.40    0.20
   0  -3   2    0.30    2.40
   0   3  -2    3.00    2.60
   0   3   2   -0.10    1.90
   2   0  -3   -0.90    2.40
   2   0   3   -0.10    1.00
   3  -2   0    4.60    2.50
   3  -2   0    0.30    0.20
   3   2   0    0.70    2.20
   3   2   0    4.20    2.40
  -3   2   0   -1.50    2.90
  -2   0   3    1.60    2.60
  -2   0  -3    0.30    0.20
   3   0   1   -4.60    0.20
   3   0   1   -3.30    1.70
   1  -3   0   -3.80    1.80
   3   0  -1   -5.30    2.30
  -1   3   0   -9.20    2.40
   0  -1  -3   -3.10    1.40
   0  -1   3   -7.30    1.50
   0   1  -3   -6.20    1.70
   0   1   3   -5.80    1.30
  -3   0  -1   -4.30    2.00
  -3   0  -1   -5.00    0.20
  -3   0   1   -3.30    2.00
  -1  -3   0   -4.90    1.90
   1   3   0   -3.40    2.20
  -3  -1  -1  770.92   21.30
   1   3  -1  707.33   21.80
   1  -3   1  694.53   21.80
  -3   1   1  716.33   22.00
  -3  -1  -1  687.43   19.70
   3  -1   1  742.43   19.70
   3   1  -1  706.63   21.80
   1  -1   3  715.33   20.80
   3  -1   1  725.63   21.50
  -1   1   3  736.03   21.30
  -1  -1  -3  771.92   19.90
  -1   3   1  724.93   21.70
   1   1  -3  735.23   21.40
  -3   1  -1  731.43   21.60
   1  -1  -3  725.23   21.30
   3   1   1  739.03   21.30
   1  -3  -1  699.23   21.70
  -3  -1   1  729.03   21.90
   1   3   1  757.82   21.40
   3  -1  -1  716.93   21.90
  -1   1  -3  713.53   19.70
  -1   1  -3  718.93   19.70
  -1   1  -3  747.03   20.90
  -1   3  -1  739.33   22.00
  -1  -3   1  715.23   21.70
   2   1  -3   45.10    4.50
  -3   2   1   46.90    5.10
  -3  -2  -1   40.80    1.40
   3   2  -1   39.70    3.60
  -1  -3  -2   42.80    1.30
   3   2  -1   46.30    3.80
   1   3  -2   41.80    1.30
   2  -1   3   46.50    3.10
   1  -3   2   39.30    4.30
   1   3  -2   41.10    1.30
  -3   2   1   43.40    1.20
   3  -2   1   38.00    4.10
   3  -2   1   44.70    1.30
   1   3  -2   42.10    4.50
  -1  -3  -2   40.60    3.40
  -2   1   3   41.30    4.40
  -1  -3   2   44.80    4.30
  -3   2  -1   42.80    4.60
  -1   3  -2   46.20    4.60
   1   3   2   40.80    3.40
   1  -3  -2   45.00    1.20
  -2   1  -3   39.50    1.30
   2   1   3   42.70    1.30
   3   2   1   42.40    3.40
   3   2   1   46.20    3.50
   3  -2  -1   48.20    4.80
  -2   1  -3   39.90    1.30
  -2   1  -3   41.40    3.30
   0   2  -3  814.02   22.00
  -2   3   0  819.22   24.50
  -2  -3   0  816.42   23.90
   0   2  -3  811.82   23.80
   3   0  -2  807.52   24.50
   3   0   2  779.72   23.20
   2   3   0  815.32   23.90
  -3   0  -2  834.22   23.30
   0  -2  -3  803.02   23.10
   0  -2   3  828.82   23.90
   0   2  -3  831.22   22.00
   2  -3   0  772.92   24.30
  -3   0  -2  824.42   22.00
  -3   0   2  810.32   24.50
   0   2   3  819.12   23.20
   3   1  -2 1160.18   33.60
  -3  -1  -2 1142.29   32.00
   3  -1   2 1133.69   32.60
  -3  -1  -2 1112.39   30.90
   1  -2   3 1124.89   32.70
   1   2  -3 1117.99   30.90
  -3   1   2 1170.08   33.60
  -2  -3  -1 1121.19   32.50
   2  -3   1 1097.59   33.20
   2   3  -1 1195.28   33.20
  -1   2   3 1154.88   32.70
  -2   3   1 1116.59   33.30
   1   2  -3 1113.49   30.90
   1   2  -3 1191.18   33.10
  -3  -1  -2 1105.49   30.90
  -1  -2  -3 1190.78   31.60
   3  -1  -2 1164.28   33.50
  -1  -2   3 1075.49   32.80
  -2   3  -1 1133.49   33.40
  -1   2  -3 1157.78   32.80
  -1   2  -3 1174.58   31.00
   2   3   1 1164.38   32.60
   1  -2  -3 1121.29   32.70
   3   1   2 1157.78   32.00
  -1   2  -3 1199.98   31.00
  -3  -1   2 1213.38   33.70
  -3   1  -2 1164.98   32.70
   1   2   3 1155.68   31.60
   2  -3  -1 1082.59   33.20
  -2  -3   1 1168.88   33.20
   2  -2   3 2649.73   71.59
  -3   2   2 2662.63   72.49
  -2  -3  -2 2752.12   71.09
  -2  -3  -2 2428.06   69.79
   3   2  -2 2532.95   72.49
   2   2  -3 2765.72   72.19
  -2   2   3 2575.64   72.29
   3   2  -2 2584.94   72.09
  -2   3   2 2538.75   72.19
   2   3  -2 2611.84   72.19
   2  -3   2 2546.55   71.99
   3  -2   2 2526.85   71.79
   2  -2  -3 2373.76   69.69
  -2   2  -3 2699.83   71.69
   2   2   3 2658.33   70.09
   2  -3  -2 2446.16   72.09
   2   3   2 2718.33   71.09
   3  -2  -2 2477.05   72.29
  -3   2  -2 2655.93   71.89
  -2   3  -2 2622.64   72.19
  -2  -3   2 2422.36   71.99
   3   2   2 2714.93   70.89
   3   2   2 2553.24   70.89
  -3   0  -3   -0.70    0.30
  -3   0  -3    0.30    1.80
  -3   0  -3   -0.50    0.30
  -3   0   3   -1.80    3.40
  -3   3   0   -3.50    2.60
   0  -3  -3   -5.00    2.20
   0  -3  -3   -1.10    0.30
   0  -3   3    3.60    2.30
   0   3  -3   -0.50    0.30
   0   3  -3    5.90    3.10
   0   3  -3   -0.70    0.30
   0   3   3   -3.80    2.10
   0   3   3   -0.70    0.20
   3  -3   0   -3.20    3.20
   3  -3   0   -0.40    0.20
   3   0  -3   -3.20    3.10
   3   0   3   -0.40    1.60
   3   0   3   -1.00    0.30
   3   3   0    1.00    2.60
  -3  -3  -1 3479.05   99.19
  -3  -1  -3 3749.52   99.79
   3  -1   3 3719.43  100.59
   3   1  -3 3723.03  102.09
  -3   1   3 3646.64  101.89
   3   3  -1 3596.14  101.49
  -3   3   1 3573.54  101.99
  -1  -3  -3 3854.41  100.29
   3  -3   1 3554.44  101.69
   1   3  -3 3810.42  101.69
  -1   3   3 3765.72  101.29
   1  -3   3 3626.64  101.39
   1  -3  -3 3588.94  101.09
  -1   3  -3 3973.10  101.69
   1   3   3 3668.03  100.29
   3  -3  -1 3581.94  101.89
  -1  -3   3 3663.43  101.59
   3  -1  -3 3576.04  101.79
  -3  -1   3 3819.22  102.09
  -3   1  -3 3711.83  100.69
   3   1   3 3711.73   99.69
  -3   3  -1 3711.53  101.89
   3   3   1 3539.25  100.89
  -3  -3  -2 1226.38   32.20
  -3  -3  -2 1177.88   32.20
  -3  -2  -3 1184.28   32.20
   3  -3   2 1177.58   34.80
  -3   2   3 1204.18   35.20
   2   3  -3 1187.88   32.20
  -3   3   2 1174.88   35.40
  -2  -3  -3 1231.98   33.20
  -2  -3  -3 1178.88   32.20
   3   3  -2 1194.48   35.10
   3  -2   3 1203.28   34.30
  -2   3   3 1167.38   35.00
   3   3  -2 1200.88   32.10
   2  -3   3 1234.48   34.80
   2   3  -3 1162.88   32.10
   2   3  -3 1239.38   35.20
   3   2  -3 1187.28   35.30
   3   2  -3 1246.48   35.20
   3   3  -2 1164.48   32.10
  -3   2  -3 1226.48   34.50
   3  -2  -3 1128.89   35.00
   3  -2  -3 1127.19   32.20
  -2   3  -3 1209.48   34.90
  -2  -3   3 1155.78   35.00
  -3   3  -2 1196.28   35.10
   3   2   3 1241.38   32.90
   3   2   3 1248.28   33.00
   3   2   3 1202.68   32.20
   2  -3  -3 1126.89   32.20
   2   3   3 1165.78   33.30
   3  -3  -2 1115.59   35.10
   3   3   2 1215.98   33.70
  -3  -3  -3  318.97    8.80
  -3  -3  -3  329.67    8.80
  -3   3   3  315.57   12.70
   3   3  -3  336.87   12.50
   3   3  -3  312.57    8.70
   3  -3   3  274.97   12.90
   3   3  -3  315.87    8.70
   3  -3  -3  320.07   12.40
   3  -3  -3  313.97    8.70
   3   3   3  327.07   10.10
  -4   0   0   50.09    5.10
  -4   0   0   49.99    1.60
   0  -4   0   55.89    4.10
   0   0  -4   52.59    3.30
   0   0  -4   46.90    3.60
   0   4   0   48.10    5.10
   4   0   0   50.69    4.70
   0  -4   1 4122.49  112.79
   0   4  -1 4090.19  112.79
   0   4   1 4113.29  112.59
   1   0  -4 4171.38  112.09
   4  -1   0 3952.00  112.59
   4   1   0 3980.20  112.59
   0  -4  -1 3958.80  112.39
  -4  -1   0 4022.60  112.49
  -4   1   0 4303.67  112.89
  -1   0  -4 4305.07  110.99
   0  -4  -1 3987.50  110.29
  -2   0  -4 5265.57  136.79
   0   4  -2 5178.48  138.99
   0   4   2 4948.50  138.29
   2   0   4 5155.28  136.69
   4  -2   0 5034.80  138.89
   4   2   0 4981.10  138.59
  -4   2   0 4880.21  138.99
   0  -4   2 5000.00  138.79
   0  -4  -3 1813.42   49.20
   0   4  -3 1862.71   52.29
   3   0  -4 1803.72   52.39
   3   0  -4 1831.92   49.30
   3   0   4 1867.71   49.99
   4  -3   0 1782.72   52.29
   4   3   0 1812.62   51.79
   4   3   0 1801.32   52.09
   0   4   3 1760.52   51.29
  -4   3   0 1852.11   52.79
  -3   0  -4 1899.61   50.09
  -3   0  -4 1831.62   49.20
  -3   0   4 1851.91   52.39
   0  -4   3 1765.02   52.09
   0  -4  -3 1781.22   51.39
  -1   4   0   -1.30    3.30
   0  -1  -4   -1.00    1.80
  -4   0  -1   -0.70    0.30
  -4   0   1   -2.70    3.40
   0   1  -4   -2.00    2.00
   4   0   1   -0.80    0.30
   1   4   0    2.10    2.40
   4   0   1   -1.70    2.50
   4   0  -1   -2.80    2.90
   0  -1  -4   -1.10    0.30
  -1  -4   0    0.10    2.10
  -1  -4   0   -0.60    0.40
   0   1   4   -0.80    1.70
   1  -4   0   -2.30    2.90
  -4   0  -1   -0.30    2.70
  -4  -1  -1  251.87    7.30
  -1   4   1  260.77   10.40
  -1   1   4  278.37    9.40
   4  -1   1  273.87   10.00
   4  -1   1  273.97    7.30
   1   1  -4  269.77    9.50
  -1  -1  -4  264.87    7.70
   1  -1   4  267.27    8.80
   4   1  -1  267.87   10.50
  -4   1   1  270.17   10.30
  -4   1   1  262.37    7.20
  -1  -4  -1  247.08    7.30
   1  -4   1  269.37   10.50
   1   4  -1  260.27   10.30
  -1  -1  -4  272.47    7.80
  -4  -1  -1  261.67    9.60
  -1   1  -4  276.77    8.90
  -4   1  -1  257.97    7.30
  -4  -1   1  251.27   10.50
   4  -1  -1  256.37   10.50
  -4   1  -1  272.87   10.20
  -1   1  -4  252.57    7.20
  -1   4  -1  282.07   10.80
   4   1   1  267.67    9.60
   1  -1  -4  240.48    7.30
   1  -4  -1  259.07   10.20
   1   4   1  264.07    9.90
  -1  -4   1  261.47   10.10
  -1   1  -4  253.07    7.20
   1  -1  -4  276.77    9.50
   1   4  -2  748.53   22.80
   1  -4   2  693.33   22.60
  -4  -2  -1  721.23   19.90
  -1  -4  -2  747.23   19.90
  -1  -4  -2  718.93   19.90
   2  -1   4  738.33   21.20
   2   1  -4  720.33   22.70
  -1   4   2  742.63   22.70
  -2   1   4  725.23   22.40
  -1  -4  -2  754.22   22.10
   4   2  -1  705.63   22.90
   4  -2   1  775.52   19.90
  -4   2   1  740.13   19.80
  -4   2   1  728.53   23.40
   4  -2   1  717.63   22.60
   2   1  -4  766.42   22.50
   4   2   1  753.52   22.20
  -1   4  -2  751.22   23.20
   2   1   4  732.73   19.90
   1  -4  -2  689.93   19.90
   1   4   2  718.33   22.00
   2  -1  -4  715.43   19.90
  -2   1  -4  762.72   21.40
  -2   1  -4  729.33   19.90
  -4   2  -1  750.92   23.00
   4  -2  -1  732.53   22.90
  -1  -4   2  710.43   22.70
  -2   1  -4  730.03   19.90
   3  -1   4  385.86   12.30
   4  -3   1  394.66   14.20
  -4  -3  -1  379.86   10.70
  -1  -4  -3  380.36   10.60
  -1  -4  -3  384.26   12.70
  -4   3   1  372.26   14.70
   1   4  -3  394.46   10.60
  -3   1   4  390.36   14.10
   4  -3   1  419.46   10.60
  -1  -4  -3  403.16   10.60
  -3  -1  -4  385.36   10.50
  -3  -1  -4  390.66   10.60
  -1   4   3  376.46   13.40
   4   3  -1  371.16   10.50
   1   4  -3  387.66   10.60
   1  -4   3  377.46   13.90
   3   1  -4  396.56   14.30
   1   4  -3  397.86   14.30
  -4  -3  -1  390.26   10.70
   4   3  -1  399.36   14.30
   4   3  -1  367.26   10.50
   4   3  -1  373.06   13.80
   3  -1  -4  391.46   14.10
   1  -4  -3  374.26   10.60
   4   3   1  391.86   13.00
  -3   1  -4  385.16   10.60
   3   1   4  400.46   10.70
   4  -3  -1  370.86   14.40
  -3   1  -4  378.56   10.60
   4   3   1  394.06   13.60
  -1   4  -3  396.56   14.40
   1   4   3  396.06   12.80
  -4   3  -1  415.06   14.70
   3  -1  -4  376.16   10.60
   1  -4  -3  361.46   13.30
  -3   1  -4  396.86   12.50
  -1  -4   3  384.16   14.00
   4   0  -2 6376.86  181.38
   4   0   2 6795.22  180.28
   0  -2  -4 6647.14  179.68
  -4   0   2 6509.05  181.48
   0  -2   4 6670.03  180.48
   2   4   0 6566.54  180.88
  -4   0  -2 6729.93  180.28
   0   2  -4 6597.34  180.48
   0   2   4 6734.73  179.78
   2  -4   0 6596.84  181.38
  -2   4   0 6588.14  181.38
  -2  -4   0 6771.42  180.88
   2   4  -1   49.20    5.30
   1   2  -4   53.59    4.90
  -1   2   4   52.19    4.40
   4  -1   2   51.29    4.80
   1  -2   4   46.60    3.90
   4  -1   2   44.90    1.50
  -4  -1  -2   52.39    4.40
  -4  -1  -2   47.20    1.50
  -4   1   2   45.00    5.30
  -2  -4  -1   45.00    1.60
   2  -4   1   45.70    5.80
   4   1  -2   45.30    5.10
  -2   4   1   43.50    4.70
  -1  -2  -4   47.90    2.60
  -1  -2  -4   44.10    1.50
  -1  -2   4   43.30    4.60
  -1   2  -4   52.79    4.40
  -4  -1   2   48.20    5.30
  -2  -4   1   51.19    5.10
  -1   2  -4   44.70    1.50
   2   4   1   43.70    4.50
   1   2   4   48.20    2.60
   1  -2  -4   44.10    1.50
  -4   1  -2   56.09    5.00
  -2   4  -1   49.90    5.40
   4   1   2   55.89    4.30
   4   1   2   45.10    1.50
   2  -4  -1   49.20    5.80
   4  -1  -2   41.90    5.10
   1   2   4   46.90    1.50
   1  -2  -4   50.69    4.60
   2   4  -2 9371.76  255.07
   2   2  -4 9600.44  255.27
   2  -4   2 9090.79  254.97
   2   2  -4 9434.36  254.77
  -2   4   2 9999.00  255.37
  -4   2   2 9024.20  255.37
  -2  -4  -2 9293.07  253.87
   4   2  -2 8777.12  255.27
  -2   2   4 9270.87  254.67
   4  -2   2 9260.67  254.67
  -4   2  -2 9642.74  254.87
   2  -4  -2 9767.52  255.17
  -2   4  -2 9645.04  255.37
  -2  -4   2 9323.77  255.07
   4   2   2 9157.38  253.67
   4  -2  -2 9517.65  255.47
   2   4   2 9146.38  254.07
  -2  -4  -3  123.89    3.50
  -2  -4  -3  118.49    3.40
   3   2  -4  127.09    7.90
   3   2  -4  123.19    7.60
   2  -4   3  117.99    7.30
   2   4  -3  119.49    3.40
   2   4  -3  120.89    7.90
   4   3  -2  115.19    3.30
  -2  -4  -3  127.99    5.70
   4   3  -2  120.99    8.10
   3  -2   4  115.29    6.20
  -3   2   4  111.19    7.70
  -4  -3  -2  126.39    3.50
  -4  -3  -2  122.39    3.50
  -4   3   2  110.19    8.50
  -3  -2  -4  115.89    3.40
   4   3  -2  115.49    3.30
  -2   4   3  127.09    7.80
   2   4  -3  120.59    3.40
   4   3  -2  123.79    6.80
   2   4   3  114.89    5.80
   3  -2  -4  117.79    3.50
  -3   2  -4  123.89    3.50
   4   3   2  125.69    6.00
   3  -2  -4  111.79    7.40
   3   2   4  120.59    3.50
   4  -3  -2  110.89    7.10
  -2  -4   3  106.59    7.50
  -2   4  -3  123.59    8.00
  -3   2  -4  123.59    6.80
   2  -4  -3  118.09    8.60
   4   3   2  132.49    6.40
   2  -4  -3  116.89    3.40
   4  -3  -2  111.69    3.40
  -3   2  -4  122.99    3.50
   0   3  -4   -3.60    0.30
  -4   0   3   -2.30    4.10
   0  -3  -4   -4.40    2.40
   0  -3  -4   -3.50    0.40
   0  -3   4   -0.90    3.10
   0   3   4   -3.70    0.20
   0   3  -4   -3.30    0.30
   4   0   3   -1.80    2.50
  -3  -4   0   -5.80    3.00
  -3  -4   0   -3.10    0.50
   0   3   4   -4.40    2.40
  -3   4   0    0.50    4.30
  -4   0  -3   -1.90    3.00
   0   3  -4   -5.40    3.10
   3  -4   0   -2.80    3.10
   3   4   0   -3.30    3.20
   4   0  -3   -4.60    3.80
   4   0   3   -3.50    0.40
  -1  -3  -4  345.97   10.50
  -3   4   1  309.17   13.10
   4   1  -3  319.27   13.10
   4  -1   3  333.77    9.10
   1   3  -4  341.67    9.00
   1   3  -4  323.37   12.30
  -3  -4  -1  323.07    9.20
   4  -1   3  340.97   11.40
   3  -4   1  319.67   12.80
   3   4  -1  334.27   12.50
  -4   1   3  328.47   13.10
  -3  -4  -1  334.47   11.80
  -4  -1  -3  328.57    9.10
   1   3  -4  341.77    9.00
  -4  -1  -3  315.97    9.00
  -1   3   4  349.57    9.00
  -4  -1  -3  314.97    9.00
  -4  -1  -3  326.47   10.70
  -1  -3  -4  333.07    9.10
  -1   3   4  330.37   11.70
  -1   3  -4  340.77    9.10
  -1   3  -4  329.77   13.20
  -1   3  -4  316.97    9.10
  -1  -3   4  316.17   12.20
   1   3   4  333.47    9.00
  -3  -4   1  313.37   12.20
  -3   4  -1  337.57   13.30
   4  -1  -3  329.67   12.90
   4   1   3  326.97   10.70
   4   1   3  350.76    9.10
   1  -3  -4  321.77   11.50
   1  -3  -4  316.47    9.10
   3  -4  -1  307.67   12.30
   3   4   1  344.97   11.90
   4  -1  -3  313.57    9.00
   1   3   4  323.17   10.40
  -4  -1   3  337.57   13.20
  -4   1  -3  345.97   11.60
   4  -2   3    3.80    0.40
   4   2  -3    4.90    4.10
   4   2  -3    7.60    4.50
  -2  -3  -4    3.10    0.40
  -2  -3  -4    3.90    0.50
   2  -3   4    5.60    3.20
  -4  -2  -3    3.60    0.40
  -4  -2  -3    3.30    0.40
   3  -4   2    3.20    4.00
   3   4  -2    4.50    0.40
   3   4  -2    7.20    4.10
   3   4  -2    3.80    0.40
  -3  -4  -2    6.40    2.90
  -3  -4  -2    3.00    0.40
  -3  -4  -2    3.60    0.50
   4  -2   3    3.80    3.10
  -3   4   2    7.40    3.60
  -2  -3  -4    4.80    1.60
  -2   3   4    3.30    3.40
  -4  -2  -3    3.60    0.40
  -4   2   3   -1.00    4.60
  -4  -2  -3    3.20    0.50
   2   3  -4    3.40    0.30
   2   3  -4    1.80    3.90
   2   3  -4    3.70    0.40
   2   3   4    3.60    1.50
   2   3   4    3.40    0.40
   3  -4  -2    1.80    4.10
   3  -4  -2    3.10    0.40
   4   2   3    4.50    0.50
   2  -3  -4    1.00    3.50
  -4   2  -3    3.30    3.40
   2  -3  -4    4.20    0.50
   3   4   2    2.80    2.80
   4  -2  -3    0.70    3.10
   4  -2  -3    4.20    0.40
  -3  -4   2    4.60    4.00
  -3   4  -2    1.00    4.10
  -2   3  -4    1.50    3.40
  -2   3  -4    3.50    0.50
   4   2   3    1.30    2.00
   4   2   3    3.50    2.10
  -2   3  -4    3.40    0.50
  -4  -3  -3  845.42   23.20
  -4  -3  -3  870.71   23.20
  -3   4   3  853.21   27.20
  -4   3   3  860.61   27.50
  -3  -4  -3  874.81   24.90
  -3  -4  -3  871.51   23.20
  -3  -4  -3  866.11   23.20
   4   3  -3  899.01   27.70
  -3  -3  -4  894.81   23.20
  -3  -3  -4  837.22   23.20
   3   4  -3  861.91   23.10
  -3   3   4  874.71   27.00
   4   3  -3  855.21   27.00
   3   3  -4  856.01   26.70
   3   3  -4  840.82   27.10
   3   4  -3  862.21   26.80
   3   4  -3  870.01   23.20
   3  -4   3  856.11   26.70
   3  -3   4  818.32   26.00
   4  -3   3  842.32   26.30
   3  -3  -4  819.12   26.60
  -4   3  -3  886.61   26.80
   3  -4  -3  824.22   26.90
   3   3   4  872.81   23.90
   3   3   4  891.71   24.00
  -3  -4   3  821.62   26.90
  -3   3  -4  872.11   26.50
   3  -4  -3  833.02   23.20
   3  -4  -3  780.82   23.20
   3   4   3  838.62   25.00
   4  -3  -3  838.72   27.20
   4  -3  -3  839.42   23.20
   4  -3  -3  786.12   23.20
   3   3   4  899.61   23.20
  -3   4  -3  883.21   27.10
   3  -3  -4  850.11   23.20
   4   3   3  843.82   24.70
   4   3   3  871.41   25.00
  -4   0  -4 1065.19   28.80
  -4   0  -4 1066.19   30.20
  -4   0  -4 1089.09   28.80
  -4   0   4 1015.20   32.70
  -4   4   0 1039.20   32.90
   0  -4  -4 1031.00   31.00
   0  -4  -4 1047.00   28.80
   0   4  -4 1112.59   28.90
   0   4  -4 1114.29   28.90
   0   4   4 1022.60   31.00
   4  -4   0 1054.39   32.80
   4   0  -4 1059.89   32.80
   4   0   4 1072.79   30.10
   4   0   4 1108.59   28.90
   4   4   0 1039.80   31.80
  -4  -4  -1 1044.30   28.20
  -4  -1  -4 1044.60   28.00
  -4  -1  -4 1025.70   29.00
  -4  -1  -4 1048.40   28.10
   4  -1   4 1052.59   30.00
   4  -1   4 1075.69   28.20
  -4   1   4 1062.59   32.00
   4  -4   1 1006.10   31.90
  -4   4   1 1009.60   32.30
  -1  -4  -4 1066.49   29.90
  -1  -4  -4 1070.39   28.10
  -1  -4  -4 1041.30   28.10
   4   1  -4 1006.90   32.20
   1   4  -4 1074.29   31.80
  -1   4   4 1058.99   31.00
   4   4  -1 1008.90   31.50
   1   4  -4 1033.60   28.10
   1  -4   4 1052.79   31.40
   1   4  -4 1049.59   28.10
  -1   4  -4 1036.60   31.60
   1  -4  -4 1027.60   28.10
   1   4   4 1018.10   29.90
   4  -4  -1  980.30   32.00
  -4   4  -1 1023.40   31.90
   4  -1  -4 1013.80   32.00
   4  -1  -4 1011.40   28.10
  -4  -1   4 1043.90   32.20
  -4   1  -4 1052.89   30.20
  -1  -4   4 1069.19   31.70
   4   1   4 1047.50   28.90
   4   1   4 1054.89   28.20
   1  -4  -4 1030.80   30.80
   4   4   1  989.00   30.60
   4   2  -4 7254.17  197.48
  -4   2   4 7265.87  197.88
   4  -4   2 6879.41  197.38
  -4   4   2 7245.27  197.98
  -2  -4  -4 7284.87  195.28
   4   4  -2 7608.04  198.18
   4   2  -4 7580.04  198.18
  -2   4   4 7236.98  197.18
   4   4  -2 7237.08  197.48
   2  -4   4 7066.89  197.08
   2   4  -4 7384.36  197.58
   4  -2   4 7145.79  196.28
   4  -4  -2 6933.11  197.78
  -4   4  -2 7031.50  197.58
   4  -2  -4 7298.17  197.78
   2   4   4 7307.47  195.38
  -4   2  -4 7292.37  196.48
  -2   4  -4 7286.27  197.28
   4   2   4 7484.15  194.58
   4   2   4 7374.06  194.58
   2  -4  -4 6429.36  193.98
  -2  -4   4 6911.31  197.38
   4   4   2 7192.08  196.18
  -4  -4  -3 1341.07   36.20
  -4  -4  -3 1333.57   36.20
  -4  -3  -4 1393.36   36.20
  -4  -3  -4 1366.46   36.20
   4  -4   3 1342.07   40.00
   3   4  -4 1349.07   36.10
  -4   3   4 1300.77   40.50
   4   4  -3 1384.26   36.10
   4   4  -3 1301.17   40.20
  -4   4   3 1254.57   40.30
  -3  -4  -4 1354.56   37.50
  -3  -4  -4 1401.66   36.20
  -3  -4  -4 1341.77   36.20
   4   3  -4 1269.27   40.70
  -3   4   4 1315.47   40.20
   4   3  -4 1355.16   40.30
   4   4  -3 1316.27   40.90
   4   4  -3 1369.76   36.10
   3  -4   4 1328.07   39.70
   3   4  -4 1370.86   36.10
   3   4  -4 1342.97   40.10
   4  -3   4 1318.47   39.30
  -3   4  -4 1380.36   40.00
   4  -4  -3 1311.27   40.40
   4  -4  -3 1297.67   36.10
   4  -4  -3 1304.37   36.30
  -4   3  -4 1341.37   39.60
   4  -3  -4 1391.76   40.60
   4  -3  -4 1335.27   36.20
   4  -3  -4 1290.57   36.20
   3   4   4 1346.27   37.60
   3  -4  -4 1303.37   39.90
  -4   3  -4 1199.78   36.40
   4   3   4 1370.56   37.20
   4   3   4 1377.36   37.30
   4   3   4 1421.36   36.30
  -4   4  -3 1367.66   40.30
  -4   4  -3 1298.67   36.50
   3  -4  -4 1340.37   36.20
   3  -4  -4 1310.37   36.30
   4   4   3 1363.96   38.20
   4   4   3 1331.97   38.40
  -4  -4  -4    7.60    0.70
  -4  -4  -4    6.30    0.60
  -4  -4  -4    6.90    0.80
   4   4  -4   14.10    5.70
   4   4  -4    4.80    5.80
  -4   4   4    9.20    5.70
   4   4  -4    6.90    0.60
   4   4  -4    7.50    0.60
   4  -4   4   12.60    4.70
   4  -4  -4    8.20    0.80
   4  -4  -4   11.40    5.40
  -4   4  -4    6.70    5.10
  -4   4  -4    7.10    1.20
   4  -4  -4    6.30    0.70
   4   4   4    7.60    2.70
   4   4   4    7.30    2.90
  -5   0   0   -7.90    3.70
  -5   0   0   -0.80    0.30
   0  -5   0   -0.50    3.50
   0  -5   0   -0.10    0.40
   0   0  -5   -2.00    2.10
   0   0  -5   -0.30    2.50
   0   0  -5    0.10    0.40
   0   5   0    4.30    4.10
   5   0   0   -1.10    3.50
   1   0  -5   -0.30    3.00
   1   0  -5   -1.60    0.40
   5  -1   0   -0.40    3.80
   5   1   0   -4.40    3.30
   1   0  -5   -6.50    2.40
   0  -5   1   -2.50    0.40
   0   5  -1   -5.00    4.00
  -5  -1   0   -3.30    3.60
  -5  -1   0   -2.80    0.30
  -5   1   0   -7.10    4.00
  -5   1   0   -2.60    0.30
  -1   0  -5   -3.60    2.20
  -1   0  -5   -0.60    2.00
  -1   0  -5   -1.50    0.30
   0  -5  -1    6.50    3.80
   0  -5  -1   -2.00    0.40
   0  -5   1   -3.50    3.70
   0   5   1    2.80    3.10
   2   0  -5   -0.20    0.40
   2   0  -5    1.00    3.30
   0   5   2   -4.40    3.40
  -2   0  -5    0.70    1.70
  -2   0  -5   -0.60    0.30
   5  -2   0   -4.90    3.90
   5   2   0   -0.60    3.80
  -5   2   0   -0.40    0.30
   0  -5  -2    0.70    0.40
   0  -5   2    1.20    4.10
   0   5  -2   12.00    4.70
  -5   2   0    1.70    4.50
   0   5   3    4.40    3.60
  -3   0  -5   -0.20    0.30
  -3   0  -5   -0.60    1.80
  -3   0  -5    0.30    0.30
   5  -3   0   -1.80    4.30
   3   0   5    0.00    0.30
   0  -5  -3    0.20    0.20
   0  -5  -3   -0.40    0.40
   3   0  -5    4.90    4.10
   3   0  -5    0.30    0.40
   3   0   5    2.30    1.40
   5   3   0    0.90    3.70
   5   3   0   -0.10    4.00
   0  -5  -3    0.60    0.60
   0  -5   3    2.90    3.30
   0   5  -3    1.80    3.60
   0  -5  -3    0.10    3.40
  -3   0   5   -2.10    4.00
  -5   3   0   -0.50    4.60
   4   0  -5    1.50    4.70
   5  -4   0   -0.60    4.90
   4   0   5   -0.10    0.40
  -5  -4   0   -0.30    0.40
  -5   4   0    3.50    4.30
  -5   4   0    0.10    0.90
   4   0  -5   -0.80    0.40
   4   0   5   -1.20    1.90
   0  -5  -4    0.10    0.60
   0  -5   4   -1.70    4.40
   0   5  -4   -0.20    3.80
   0   5   4    4.40    3.30
   5  -4   0   -0.40    0.30
   5  -4   0   -0.30    0.50
   5   4   0   -3.70    3.90
   5   4   0    7.90    4.60
   0  -5  -4    0.20    0.20
   0  -5  -4   -0.70    0.40
  -4   0  -5    0.30    2.20
  -4   0  -5   -0.10    0.30
  -4   0   5   -0.50    4.60
  -4   0  -5   -0.30    0.30
   0  -5  -4   -1.80    3.50
   0   1  -5   -3.70    0.40
   0  -1  -5   -4.50    2.30
   0   1  -5   -8.40    2.70
   1   5   0   -6.60    3.80
   5   0   1   -4.40    0.30
   1  -5   0   -1.50    3.00
   1  -5   0   -2.80    0.40
  -1  -5   0   -7.30    3.40
  -5   0   1   -9.00    3.90
  -5   0   1   -4.20    0.30
   0  -1  -5   -4.10    0.40
  -5   0  -1   -4.30    0.30
  -1   5   0    2.20    4.40
   5   0  -1   -6.00    3.80
  -1  -5   0   -4.60    0.40
   1   1  -5    9.90    3.40
  -1  -1  -5    8.00    0.70
  -5  -1  -1   12.70    3.70
  -5  -1  -1    7.00    0.70
   1   5  -1   11.20    3.50
   1  -1   5    7.30    2.30
  -5   1   1    7.70    4.80
  -5   1   1    7.00    0.60
  -1  -5  -1    9.50    0.80
   5   1  -1    8.20    4.30
   1  -5   1    9.40    0.80
   1   1  -5    7.90    3.10
   1  -5   1   16.70    4.50
   5  -1   1    7.70    0.70
  -1  -1  -5   11.40    2.80
  -1   1   5    8.10    2.80
  -1  -1  -5   10.90    1.90
  -1   5   1   12.70    3.70
   1  -5  -1   14.90    4.30
  -1   5  -1   16.40    5.00
   1   5   1   11.10    4.10
   5   1   1   12.00    3.60
   1  -1  -5    7.00    3.00
   1  -1  -5    9.10    0.70
  -1   1  -5    7.50    0.70
  -5   1  -1   10.50    5.00
  -1  -5   1   10.10    3.20
   1  -5  -1    7.10    0.70
   5  -1  -1    8.10    3.50
  -1   1  -5   10.30    2.70
  -5   1  -1    9.40    0.70
  -5  -1   1    6.90    4.20
   2   1  -5 1693.53   45.20
  -2  -1  -5 1634.64   45.20
   2   1  -5 1732.43   48.00
  -1   5   2 1677.13   48.50
  -5  -2  -1 1667.13   45.20
  -1  -5  -2 1649.44   47.80
  -5   2   1 1626.04   48.80
   2  -1   5 1730.13   46.60
   5   2  -1 1675.83   48.90
   1  -5   2 1569.54   48.60
   1   5  -2 1703.63   48.70
  -1  -5  -2 1673.43   45.20
  -2   1   5 1690.83   48.10
  -2   1  -5 1675.13   45.20
  -2   1  -5 1703.63   46.80
  -1  -5   2 1659.63   48.40
  -2   1  -5 1706.73   45.20
   1  -5  -2 1629.94   48.30
   5  -2  -1 1646.04   48.90
   1  -5  -2 1701.53   45.20
   5   2   1 1723.03   48.10
  -1   5  -2 1661.83   48.90
   1   5   2 1672.83   48.00
   2  -1  -5 1675.43   48.00
   2  -1  -5 1636.54   45.20
  -1  -5  -3 2916.21   79.79
  -5   3   1 2942.81   83.89
   3   1  -5 2922.01   83.29
   1  -5   3 2892.21   83.19
   1   5  -3 3108.59   83.69
   3  -1   5 3102.59   81.19
  -3   1   5 2905.51   83.09
  -1  -5  -3 3008.50   82.09
  -1  -5  -3 2918.41   79.69
   5   3  -1 3096.19   83.19
   5   3  -1 3167.78   83.69
  -3  -1  -5 2894.51   79.59
  -1   5   3 2932.21   82.79
   5  -3   1 2934.81   83.29
   1   5   3 3040.90   82.29
   1  -5  -3 2815.62   79.79
   3  -1  -5 2900.91   79.69
  -1   5  -3 2932.31   83.49
   1  -5  -3 2984.40   79.69
   5  -3  -1 2821.52   83.39
   5  -3  -1 2816.12   79.69
  -5   3  -1 3041.00   83.59
   5   3   1 2898.11   82.19
  -1  -5   3 2763.12   83.09
   5   3   1 3035.80   82.79
  -3   1  -5 3029.10   81.29
  -1   5   4 4746.43  130.99
   4  -1   5 4638.24  129.39
   1  -5   4 4729.53  131.49
  -4   1   5 4496.35  131.59
  -5   4   1 4641.34  132.29
   5  -4   1 4671.83  131.79
   5  -4   1 4779.72  127.79
   1   5  -4 4866.11  131.89
   4   1  -5 5071.69  132.29
   5   4  -1 4890.91  132.09
   5   4  -1 4718.63  131.39
  -1  -5  -4 4783.22  127.89
  -4   1  -5 4907.71  129.59
   1  -5  -4 4768.32  130.89
   5  -4  -1 4632.54  127.79
  -5  -4   1 4469.05  127.79
  -5   4  -1 4683.23  128.09
   5  -4  -1 4577.24  131.89
   5   4   1 5062.49  130.79
   5   4   1 4799.12  131.19
   4  -1  -5 4630.14  131.69
  -5   4  -1 4939.41  132.19
  -1  -5   4 4544.95  131.59
  -1   5  -4 4869.51  131.89
   1   5   4 4681.63  130.09
   1  -5  -4 4688.93  127.79
  -2  -5   0  212.28    6.00
  -5   0  -2  209.98    6.00
  -5   0   2  202.58   10.50
   5   0  -2  207.78   10.40
   5   0   2  218.98    9.10
  -2  -5   0  199.28    9.40
  -5   0  -2  224.58    9.20
  -2   5   0  230.88   10.80
   0  -2  -5  210.38    7.90
   0  -2  -5  195.48    5.90
   0  -2   5  212.68    8.60
   0   2  -5  207.08    5.90
   0   2  -5  212.08    8.80
   0   2  -5  197.38    6.00
   0   2  -5  210.68    5.90
   0   2   5  214.58    7.80
   2  -5   0  236.18   10.60
   2   5   0  224.38    9.90
   5   0   2  206.68    6.00
   5   1  -2   75.89    7.50
   2  -5   1  101.09    7.80
  -2  -5  -1   84.79    2.60
   2   5  -1   78.99    7.20
  -5  -1  -2   80.49    6.10
  -5  -1  -2   83.59    2.60
   1  -2   5   93.29    5.60
   1   2  -5   79.49    6.10
  -5   1   2   94.49    6.90
  -1  -2  -5   82.59    2.50
   5  -1   2   92.69    6.50
  -1   2   5   80.69    5.60
  -2   5   1  105.59    8.00
  -1  -2  -5   93.39    3.80
   5  -1   2   90.89    2.60
  -5   1  -2  102.79    6.70
  -5  -1   2   87.59    6.60
  -1   2  -5   91.99    5.60
  -1   2  -5   77.19    2.50
   1  -2  -5   86.99    5.80
   1  -2  -5   86.79    2.60
   1   2   5   86.29    2.50
   2   5   1   93.09    6.40
   5  -1  -2   73.09    7.50
   5  -1  -2   75.79    2.50
  -1   2  -5   83.99    2.50
   2  -5  -1   99.19    7.30
   2  -5  -1   76.29    2.50
  -1   2  -5   86.49    2.50
   5   1   2   94.49    5.90
  -2   5  -1   83.99    8.00
  -2  -5   1   94.59    6.70
  -5   2   2   42.50    6.30
  -2  -5  -2   41.90    1.40
  -2  -5  -2   41.00    1.50
  -2   5   2   43.60    5.40
  -2  -2  -5   40.90    1.50
  -5  -2  -2   42.60    1.60
   5  -2   2   38.90    4.80
  -5   2   2   40.00    1.30
  -2  -5  -2   46.50    5.50
  -5  -2  -2   39.20    1.50
   2   2  -5   56.19    6.30
   5  -2   2   43.70    1.50
   5   2  -2   38.30    5.70
  -2   2   5   42.30    4.90
   2   5  -2   50.09    5.50
   2   2  -5   40.30    5.10
   2  -2   5   48.40    4.70
   2  -5   2   47.60    5.80
   2  -5  -2   40.50    5.30
  -2   2  -5   44.80    1.50
  -2   5  -2   50.39    6.30
   2   5   2   46.50    5.10
   5  -2  -2   36.70    5.80
  -2  -5   2   49.00    6.20
   2  -2  -5   44.80    5.10
  -5   2  -2   39.40    5.30
   5  -2  -2   36.20    1.50
  -2   2  -5   55.29    5.30
  -2   2  -5   44.40    1.50
   5   2   2   42.50    5.20
   2  -5  -2   38.20    1.60
   5  -2  -2   38.20    1.40
   2   2   5   42.10    1.40
   2  -5  -2   40.40    1.50
   2  -2  -5   41.10    1.50
  -2   5   3  746.13   23.70
  -2  -5  -3  725.73   19.70
  -5   3   2  709.93   24.50
  -5  -3  -2  656.73   19.60
  -5   3   2  738.23   19.50
   5  -3   2  735.53   23.50
   3   2  -5  724.83   23.40
  -3   2   5  651.33   25.30
  -2  -5  -3  713.83   22.00
  -2  -5  -3  721.43   19.60
  -5  -3  -2  752.72   19.70
   3  -2   5  734.43   22.00
  -5  -3  -2  737.53   19.60
  -3  -2  -5  714.03   19.60
   5  -3   2  767.22   19.60
   2  -5   3  720.83   23.70
   2   5  -3  742.33   23.60
   3   2  -5  709.93   23.50
   5   3  -2  726.83   24.20
   5   3  -2  768.32   23.80
   2  -5  -3  678.93   23.30
   2   5   3  712.43   22.20
   2  -5  -3  681.03   19.70
   5  -3  -2  708.13   23.70
   5  -3  -2  691.63   19.50
  -2   5  -3  708.03   24.00
   3  -2  -5  708.23   19.60
  -2  -5   3  711.53   23.70
  -3   2  -5  749.13   22.30
   5  -3  -2  684.03   19.70
   5   3   2  766.12   22.60
  -5   3  -2  681.23   19.80
   5   3   2  744.63   22.10
   3   2   5  758.72   19.70
   2  -5  -3  712.83   19.60
  -5   3  -2  721.93   23.80
   5   4  -2  344.47    9.40
   5   4  -2  344.47    9.40
   2   5  -4  355.46    9.50
  -5   4   2  346.07   15.60
  -4  -2  -5  347.97    9.40
  -2  -5  -4  359.76    9.60
  -2   5   4  338.27   13.90
  -4   2   5  344.97   14.70
  -2  -5  -4  367.86   12.10
  -2  -5  -4  344.37    9.50
   4  -2   5  327.47   12.20
   2  -5   4  349.77   14.10
   2   5  -4  356.46    9.50
   5  -4   2  349.57   14.30
   5   4  -2  329.37   14.30
  -5  -4  -2  322.07    9.50
   5   4  -2  364.76   15.20
  -5  -4  -2  344.77    9.60
   5  -4   2  361.86    9.50
  -4  -2  -5  341.67    9.40
   4   2  -5  339.97   14.80
  -4  -2  -5  338.07    9.50
   4   2  -5  376.66   14.60
   5  -4  -2  343.47   14.00
  -5  -4   2  323.97    9.50
   2   5   4  345.67   12.20
  -5   4  -2  343.07    9.90
   5  -4  -2  328.57    9.60
   2  -5  -4  341.57    9.50
   2  -5  -4  339.87    9.60
  -2   5  -4  351.56   14.60
   4  -2  -5  324.17    9.50
   4  -2  -5  327.37    9.60
  -5   4  -2  369.16   14.20
   5   4   2  358.46   12.50
   4  -2  -5  332.97   14.20
   4   2   5  363.36    9.60
   5  -4  -2  329.27    9.40
   5   4   2  343.47   13.10
   0  -3   5   -0.50    3.20
   0   3  -5    0.40    0.30
   5   0   3   -1.50    2.70
   5   0   3   -0.20    0.40
  -5   0   3    4.00    5.10
  -3   5   0    2.00    5.00
  -3  -5   0   -0.30    0.50
   0  -3  -5   -0.20    2.70
   0   3   5    1.70    2.60
   0  -3  -5    0.60    0.40
   3   5   0    1.50    3.90
   3  -5   0   -3.60    4.40
  -5   0  -3    1.90    3.20
   0   3  -5    0.40    0.30
   0   3   5    0.00    0.30
   5   0  -3   -4.80    4.40
   0   3  -5    2.00    3.80
  -3  -5   0    6.50    3.70
  -5  -1  -3 5759.72  151.28
  -1   3   5 5617.04  151.68
   3  -5   1 5424.46  152.98
  -1  -3  -5 5772.52  150.38
   5   1  -3 5444.66  153.38
   3   5  -1 5499.95  152.68
   5  -1   3 5606.84  151.68
   1   3  -5 5396.66  152.28
   1  -3   5 5666.33  152.08
  -3   5   1 5342.87  153.18
  -5   1   3 5453.85  153.28
   5  -1  -3 5373.26  153.18
   1   3   5 5710.33  150.38
   3   5   1 5772.62  152.38
  -3  -5   1 5590.34  152.68
  -3   5  -1 5770.92  153.48
  -1   3  -5 5646.63  152.18
   3  -5  -1 5250.38  149.39
   1  -3  -5 5423.06  151.48
   5   1   3 5879.11  151.28
  -5   1  -3 5558.04  151.88
  -5  -1   3 5458.15  153.38
   5  -1  -3 5062.59  149.29
   3  -5  -1 5499.35  153.18
  -1  -3   5 5633.54  152.48
   3   5  -2  303.47   12.80
  -3   5   2  283.47   13.10
   2   3  -5  305.17   12.40
   2   3  -5  273.57    8.00
  -3  -5  -2  290.67   11.10
   2  -3   5  295.27   11.40
  -2  -3  -5  288.07    8.00
  -2   3   5  277.27   11.40
   5  -2   3  293.37   11.40
   5  -2   3  307.57    8.10
  -5  -2  -3  298.77    8.10
  -5  -2  -3  284.37    8.00
  -3  -5  -2  291.57    8.10
   2   3  -5  282.87    8.00
  -5   2   3  277.17   12.40
   5   2  -3  270.27   13.10
  -3  -5  -2  299.97    8.00
  -2   3  -5  280.47    8.00
   2   3   5  300.47    8.00
   5   2   3  309.67    8.10
  -5   2  -3  306.67   11.80
   3  -5  -2  274.47    8.10
  -3  -5   2  289.37   12.40
   3   5   2  288.17   11.00
  -5   2  -3  274.77    8.20
   5   2   3  298.97   10.40
  -2   3  -5  304.67   11.90
   5  -2  -3  283.17   12.20
   5  -2  -3  283.97    8.00
   5  -2  -3  274.27    8.10
   2  -3  -5  297.47   11.60
   2  -3  -5  277.17    8.00
  -2   3  -5  299.97    8.00
   3  -5  -2  279.97    8.00
   3  -5  -2  278.67   12.60
   3   3  -5 1239.98   38.20
  -3  -5  -3 1232.68   35.80
   3   5  -3 1290.57   33.50
   3   5  -3 1201.98   37.80
   3   5  -3 1284.77   33.50
  -5  -3  -3 1158.18   33.60
  -3  -5  -3 1280.27   33.60
   3  -5   3 1215.38   37.70
   3   3  -5 1234.68   37.60
   5  -3   3 1185.38   37.00
   5  -3   3 1286.67   33.60
   5   3  -3 1213.68   37.80
   5   3  -3 1261.97   38.20
  -3   3   5 1228.18   37.40
  -5   3   3 1249.47   38.50
  -5  -3  -3 1201.68   33.40
  -5  -3  -3 1272.37   33.60
  -3  -3  -5 1252.47   33.60
  -5  -3  -3 1220.28   33.40
   3  -3   5 1206.58   36.40
  -3  -5  -3 1273.67   33.60
  -3   5   3 1241.68   38.00
   5  -3  -3 1189.68   38.10
   5  -3  -3 1212.18   33.60
  -3  -5   3 1247.78   37.90
   3   5   3 1256.27   36.10
  -3   3  -5 1238.18   33.60
   3  -5  -3 1233.88   33.60
   3  -5  -3 1245.88   33.70
  -5   3  -3 1258.27   33.80
   3  -3  -5 1218.88   33.60
   3  -3  -5 1179.88   33.60
  -5   3  -3 1199.18   37.30
   5  -3  -3 1229.18   33.50
   5   3   3 1239.38   35.50
   5   3   3 1277.37   35.90
   3  -5  -3 1223.98   37.70
  -3   3  -5 1287.87   36.80
  -3   3  -5 1251.17   33.60
   3   3   5 1311.77   33.60
  -3   5  -3 1266.47   38.10
  -5  -4  -3  109.69    3.40
   3   5  -4  109.19    9.70
  -5   4   3  127.29   10.80
  -4  -3  -5  112.49    3.40
   5   4  -3  114.59    3.20
  -3  -5  -4  115.19    3.40
  -3  -5  -4  116.29    3.40
  -5  -4  -3  114.99    3.40
  -5  -4  -3  104.79    3.10
   4  -3   5  112.49    7.90
   4   3  -5  100.69    9.30
   4   3  -5  115.49    9.90
   3  -5   4  113.29    9.10
  -4   3   5  111.09    9.50
  -3  -5  -4  121.79    6.50
   3   5  -4  115.89    3.30
   5  -4   3  125.59    8.90
  -5  -4  -3  117.49    3.40
   5   4  -3   97.89    9.40
   5   4  -3  121.79   10.20
   5   4  -3  113.69    3.20
  -5  -4  -3  104.89    3.10
  -3   5   4  123.29    9.50
   3   5  -4  117.19    3.30
  -5   4  -3  114.69    9.50
   5   4   3  115.09    6.70
   5   4   3  119.09    7.10
   3  -5  -4  115.09    3.50
  -4   3  -5   99.19    7.70
   5  -4  -3  102.29    9.50
   5  -4  -3  112.49    3.30
   5  -4  -3  111.79    3.40
   3  -5  -4  113.79    9.00
   3  -5  -4  115.29    3.30
   4  -3  -5  113.29    3.40
   4  -3  -5  109.39    3.40
   3   5   4  118.49    6.60
  -4   3  -5  104.09    3.80
  -3  -5   4  117.79    8.10
  -3   5  -4  133.79    9.90
   4   3   5  118.99    3.40
   4  -3  -5  115.69    8.90
  -5  -4   3  107.79    3.40
   0   4  -5  715.63   19.40
   0  -4  -5  687.23   21.70
   0  -4   5  684.13   23.00
   0   4  -5  696.53   19.40
   0   4   5  730.43   21.80
  -5   0   4  670.13   24.10
   0  -4  -5  700.43   19.40
   4   5   0  735.43   23.40
   5   0  -4  717.03   23.80
   5   0  -4  669.33   19.40
   5   0   4  706.23   21.30
   5   0   4  793.02   19.50
   0   4   5  754.92   19.30
   0   4  -5  732.13   23.40
  -4   5   0  686.53   24.40
  -4  -5   0  720.53   23.00
  -4  -5   0  705.23   19.40
   4  -5   0  693.73   24.00
   4  -5   0  665.33   19.40
  -5   0  -4  737.43   21.60
  -5   0  -4  716.73   19.50
  -4  -5  -1    0.30    0.40
   5  -1   4   -0.20    3.00
   5   1  -4    7.90    5.40
   1   4  -5    0.50    0.40
   5  -1   4    0.20    0.40
  -5  -1  -4    1.10    0.30
  -5  -1  -4   -0.20    2.70
  -5  -1  -4    0.50    0.40
  -5  -1  -4    0.60    0.50
  -5  -1  -4    1.10    0.30
  -1   4   5    0.40    3.70
  -1   4   5    0.70    0.20
   4   5  -1   -1.50    4.50
  -5   1   4    0.50    5.30
  -4  -5  -1    1.30    4.10
  -4  -5  -1    0.10    0.50
   1   4  -5    0.50    0.30
   4  -5   1   -4.10    5.50
   1  -4   5   -5.80    3.90
  -4   5   1   -4.00    4.20
  -1  -4  -5    0.90    2.70
  -1  -4  -5    0.10    0.40
   1   4  -5   -0.80    4.50
   5   1  -4    0.30    0.50
  -5   1  -4   -0.70    0.60
  -4  -5   1   -1.80    4.20
  -4   5  -1   -2.00    6.20
   4  -5  -1    0.20    0.40
   1  -4  -5    1.10    3.80
   1  -4  -5    1.20    0.40
   4  -5  -1    0.20    0.50
  -1   4  -5    0.30    0.40
   4  -5  -1   -8.50    4.80
   4  -5  -1    0.50    0.20
   1   4   5   -0.40    2.60
   1   4   5    0.10    0.30
   5   1   4   -3.50    2.20
   5   1   4    0.40    0.40
   4   5   1   -3.30    4.00
   5  -1  -4   -0.30    5.10
   5  -1  -4    0.30    0.40
   1  -4  -5   -0.10    0.50
  -5  -1   4   -4.90    5.40
  -5   1  -4    0.90    3.60
  -1  -4   5   -1.60    4.30
   5  -1  -4   -0.30    0.50
  -1   4  -5    0.50    0.40
  -1   4  -5    3.70    4.50
   5   2  -4  195.78   11.40
  -4   5   2  201.18   11.70
  -4  -5  -2  181.18    5.30
   2  -4   5  180.88    9.40
   5  -2   4  191.18    5.30
   5   2  -4  197.28    9.80
  -5  -2  -4  181.68    5.10
  -5  -2  -4  159.08    5.40
  -5  -2  -4  186.48    5.20
   5  -2   4  176.58    8.50
  -2  -4  -5  189.78    6.80
  -2  -4  -5  186.78    5.30
  -5  -2  -4  176.88    5.30
  -5  -2  -4  181.98    5.10
  -2   4   5  190.38    9.50
  -2   4   5  191.98    5.00
  -5   2   4  199.08   11.60
  -4  -5  -2  197.68    9.10
   4   5  -2  189.78   10.60
  -4  -5  -2  182.98    5.30
   2   4  -5  179.08    5.30
   2   4  -5  192.08   10.50
   2   4  -5  180.48    5.30
  -4  -5  -2  175.88    5.30
   4  -5   2  190.28    9.70
   4  -5  -2  175.68   10.80
   4  -5  -2  181.38    5.20
   2   4   5  191.48    6.90
   2   4   5  190.78    5.20
   5   2   4  192.48    7.20
   4   5   2  186.08    9.20
   5  -2  -4  188.08    9.90
   5  -2  -4  181.18    5.20
   5  -2  -4  182.68    5.30
  -4   5  -2  209.68   11.50
   5   2   4  174.18    6.80
   5   2   4  190.38    5.30
   4  -5  -2  183.48    5.30
   2  -4  -5  181.58    5.20
   2  -4  -5  184.78    5.30
  -5   2  -4  175.48    5.50
  -2  -4   5  183.58   10.20
  -2   4  -5  181.68    9.90
  -5   2  -4  189.98    9.60
   2  -4  -5  186.88    9.50
  -3   4   5  152.08    9.80
  -5  -3  -4  158.18    4.60
  -5   3   4  175.18   11.30
   5   3  -4  180.48    9.70
   5   3  -4  170.28   11.30
   5  -3   4  173.78    9.80
   5  -3   4  166.08    4.80
   3  -4   5  163.68    9.10
   4  -5   3  171.98   10.20
   4   5  -3  162.58    4.60
   4   5  -3  194.38   10.90
   4   5  -3  163.88    4.60
  -5   3   4  165.08    4.50
  -4   5   3  171.88   11.40
  -3  -4  -5  166.68    4.70
   3   4  -5  163.58   10.60
  -5  -3  -4  157.88    4.50
  -5  -3  -4  166.98    4.80
  -5  -3  -4  160.68    4.70
  -5  -3  -4  153.88    4.70
  -3  -4  -5  161.28    4.70
  -4  -5  -3  158.38    4.70
  -4  -5  -3  166.28    4.80
  -4  -5  -3  164.88    4.80
   4   5   3  167.38    8.30
   5   3   4  167.58    7.00
  -5   3  -4  159.28    5.10
  -5   3  -4  159.78    9.50
  -4   5  -3  163.58   11.00
   5  -3  -4  161.98   10.90
   5  -3  -4  160.88    4.70
   5   3   4  170.68    6.80
  -3   4  -5  177.88    9.90
   5   3   4  173.28    4.80
   3  -4  -5  165.88    4.70
   3  -4  -5  168.78    4.80
   4  -5  -3  160.68    4.80
   5  -3  -4  161.88    4.80
   3   4   5  159.68    5.90
   3   4   5  170.38    4.70
   4  -5  -3  164.98   10.50
   4  -5  -3  162.38    4.70
  -5  -4  -4   11.80    0.90
  -5  -4  -4   13.40    0.90
  -5  -4  -4   13.20    0.90
   5   4  -4   10.30    6.60
   5   4  -4   13.40    0.70
   4   4  -5   19.00    6.70
  -5   4   4   10.00    5.20
  -4  -5  -4   12.90    0.80
  -4  -5  -4   14.10    1.00
  -4  -5  -4   13.70    0.90
  -4  -4  -5   13.10    0.80
  -4  -4  -5   12.50    0.90
  -4  -4  -5   14.00    0.90
   4  -4   5   10.70    5.50
   4   4  -5   15.90    5.10
  -4   4   5   17.20    6.30
   5  -4   4    8.50    5.50
  -4   5   4    6.70    6.50
   5   4  -4    6.60    6.40
   4   5  -4   12.60    0.70
   4   5  -4   24.00    5.40
   4  -5   4   12.00    5.80
   4   5  -4   12.80    0.80
   5   4  -4   13.40    0.70
   4  -4  -5   13.80    1.00
  -4   4  -5   17.90    6.30
  -4   4  -5   14.10    1.50
  -5   4  -4   10.90    1.20
   4   4   5   12.50    2.10
   4   4   5   15.20    2.30
   4   4   5   12.30    0.80
   4  -5  -4   12.40    0.80
   4  -5  -4   14.00    1.10
   4  -4  -5   15.70    5.80
   4   5   4   13.90    3.80
   5  -4  -4   22.60    6.50
   5  -4  -4   13.60    0.80
   5  -4  -4   13.30    1.00
  -4   5  -4    9.70    6.30
   4  -4  -5   13.00    0.80
   4  -5  -4    9.20    5.90
  -5  -4   4   11.20    0.90
  -5   4  -4   17.30    6.50
   5   4   4    8.20    3.30
   5   4   4   12.90    3.60
  -5  -5   0   -1.90    0.40
  -5   0  -5   -1.30    0.40
  -5   0  -5    0.30    3.00
  -5   0  -5   -1.70    0.60
  -5   0  -5   -1.40    0.40
  -5   0   5  -11.80    5.70
  -5   5   0   -4.40    8.90
  -5   5   0   -1.50    1.00
   0  -5  -5   -2.30    4.10
   0  -5  -5   -1.60    0.50
   0  -5  -5   -0.40    0.60
   0  -5   5   -3.40    4.90
   0   5  -5   -1.10    0.40
   0   5  -5  -10.90    5.30
   0   5  -5   -1.10    0.50
   0   5   5    4.90    3.80
   5  -5   0   -1.70    0.30
   5  -5   0   -1.90    0.50
   5   0  -5    1.20    5.30
   5   0  -5   -1.70    0.40
   5   0  -5   -0.90    0.50
   5   0   5   -0.60    2.60
   5   0   5   -1.50    0.40
   5   5   0    4.90    4.80
   5   5   0   -7.30    4.90
  -5  -5  -1  172.78    5.00
  -5  -5  -1  161.38    4.90
   5   1  -5  164.78   11.00
  -5  -1  -5  165.68    4.80
  -5  -1  -5  162.08    4.80
  -5  -1  -5  165.98    4.90
  -5  -1  -5  168.78    4.80
   5   5  -1  167.98   10.80
   1   5  -5  173.88    4.90
  -5   1   5  160.78   11.30
   5  -1   5  169.48    4.90
   5  -5   1  175.28    4.80
  -5   5   1  180.88   10.50
  -5   5   1  151.28    5.30
  -1  -5  -5  181.98    8.30
  -1  -5  -5  174.78    4.90
  -1  -5  -5  164.18    5.00
   1   5  -5  159.78   10.90
   5  -5   1  160.08    4.90
  -1   5   5  176.48    9.50
   5  -5   1  189.28   10.00
   5   1  -5  159.58    4.90
   5   5  -1  174.98   10.30
   1  -5   5  185.88   10.10
   5  -1   5  166.08    7.80
   1   5  -5  173.98    4.90
  -1  -5   5  169.88   10.40
  -5   1  -5  163.18    5.00
   5  -5  -1  184.88   11.40
   1  -5  -5  169.98    4.90
   5  -5  -1  160.98    4.70
   5  -5  -1  166.48    4.90
   1  -5  -5  178.88    9.70
  -5   5  -1  162.48    5.40
  -1   5  -5  172.78   10.80
   5  -1  -5  167.28    9.70
   5  -1  -5  164.18    4.90
   5  -1  -5  166.78    4.90
   1   5   5  171.58    8.20
  -5   5  -1  181.08   10.50
  -5  -5   1  164.68    4.90
   5  -5  -1  178.28    4.70
   5   1   5  171.18    6.20
   5   1   5  174.38    4.90
   1  -5  -5  169.08    5.00
  -5   1  -5  177.08    8.50
   5   5   1  169.88    9.70
   5   5   1  157.88   10.40
  -5  -5  -2   89.39    2.70
  -5  -5  -2   88.69    2.80
  -5  -5  -2   84.49    2.70
   2   5  -5  108.09    9.60
  -5  -2  -5   86.49    2.50
  -5  -2  -5   84.49    2.60
  -5  -2  -5   86.49    2.70
  -5  -2  -5   87.29    2.50
   5   2  -5   90.89    7.70
   5   2  -5   93.39    9.90
  -5   2   5   76.09    9.60
   2  -5   5   81.49    8.10
   2   5  -5   87.79    2.70
  -5   5   2   84.69   10.70
  -2  -5  -5   82.29    5.80
  -2  -5  -5   87.99    2.60
  -2  -5  -5   88.09    2.70
   5   2  -5   82.99    2.70
   5  -5   2   85.29    9.20
  -2   5   5   84.39    8.80
   5  -2   5   92.09    2.70
   5   5  -2   89.79    9.20
   5   5  -2   94.59    9.80
   5  -2   5   89.79    6.90
   2   5  -5   85.99    2.70
   5  -5   2   78.59    2.70
  -5   5  -2   85.59    3.30
   5  -5  -2   86.49    9.60
   5  -5  -2   85.99    2.60
   5  -5  -2   83.09    2.80
  -2   5  -5   93.79    9.10
  -5  -5   2   83.99    2.70
   5  -2  -5  100.99    9.40
   5  -2  -5   85.79    2.70
   5  -2  -5   87.39    2.80
  -5   5  -2   87.29   10.10
   2  -5  -5   87.79    8.90
  -5   2  -5   89.69    7.50
  -5   2  -5   85.19    3.00
  -2  -5   5   82.59    8.70
   5   2   5   90.89    3.50
   5   2   5   86.29    3.60
   5   2   5   88.29    2.70
   2  -5  -5   87.09    2.70
   2  -5  -5   86.79    2.80
   5   5   2   89.99    6.90
   5   5   2   90.29    8.20
  -5  -5  -3  168.28    4.90
  -5  -5  -3  177.88    5.00
  -5  -5  -3  168.78    4.90
   5   5  -3  179.78   12.30
  -5  -3  -5  171.28    4.70
  -5  -3  -5  169.68    4.90
  -5  -3  -5  169.78    4.90
  -5  -3  -5  166.58    4.90
  -5  -3  -5  173.78    4.70
   3   5  -5  175.38    4.90
   5   5  -3  169.18    4.80
  -5   3   5  169.88   12.20
   5   3  -5  157.48   11.50
   5   5  -3  173.68    4.80
  -5   5   3  187.38   11.20
  -3  -5  -5  172.58    4.90
  -3  -5  -5  174.68    4.90
  -3  -5  -5  153.48    4.80
   5   5  -3  175.88   11.60
  -3   5   5  155.68   10.90
   3   5  -5  185.38   11.80
   5  -3   5  157.38    9.50
   3  -5   5  164.58   10.30
   3   5  -5  171.98    4.80
   5   3  -5  168.18   12.10
   5  -5   3  154.38   10.90
   5  -5  -3  176.28   11.90
   3  -5  -5  173.98    4.90
   5  -5  -3  173.08    5.00
  -5   3  -5  173.08   10.50
   5  -3  -5  164.38   11.60
   5  -3  -5  171.38    4.90
   5  -3  -5  163.08    4.90
   3  -5  -5  166.78    5.00
  -5   5  -3  179.28   11.90
   5  -5  -3  169.48    4.80
   5   3   5  172.18    5.80
   5   3   5  166.18    5.80
   5   3   5  167.78    4.90
  -5   3  -5  168.58    5.30
  -3   5  -5  178.28   11.30
  -5  -5   3  168.78    4.90
  -5   5  -3  166.08    5.50
   5   5   3  165.18    8.90
   5   5   3  168.48    9.10
  -5  -5  -4   31.50    1.30
  -5  -5  -4   30.80    1.40
  -5  -5  -4   30.90    1.30
   5   4  -5   28.40    1.20
  -5  -4  -5   31.10    1.30
  -5  -4  -5   33.10    1.30
  -5  -4  -5   28.90    1.30
   5   5  -4   31.80    7.90
   5   5  -4   34.30    8.00
   5   5  -4   32.30    1.20
  -5   4   5   36.70    8.00
   5   4  -5   36.20    8.20
   4   5  -5   31.80    1.20
   4   5  -5   41.00    7.80
  -5   5   4   29.10    8.40
  -4  -5  -5   32.00    1.30
  -4  -5  -5   31.40    1.40
  -4  -5  -5   29.70    1.30
   4   5  -5   37.00    8.00
  -4   5   5   28.80    7.40
   5   4  -5   28.10    7.60
   5  -4   5   29.60    6.50
   5   5  -4   32.50    1.10
   4  -5   5   30.40    6.40
   5   4  -5   28.50    1.10
   5  -5   4   43.90    6.90
   4   5  -5   30.70    1.20
  -4   5  -5   30.30    7.10
   4  -5  -5   25.60    6.80
   4   5   5   26.90    3.80
  -5   5  -4   29.10    2.80
   5  -5  -4   31.20    1.30
   5  -5  -4   30.20    1.40
  -5   5  -4   31.10    2.20
   5  -4  -5   29.50    7.30
   5  -4  -5   31.30    1.30
   5  -4  -5   31.80    1.40
   4  -5  -5   29.80    1.30
   5  -5  -4   21.20    7.20
   4   5   5   33.40    3.80
  -5   5  -4   49.30    8.00
  -5  -5   4   30.90    1.30
   5   4   5   29.10    3.10
   5   4   5   38.60    4.00
   4  -5  -5   30.60    1.50
  -5  -4   5   29.10    1.30
  -5   4  -5   50.79    7.50
  -5   4  -5   30.00    2.00
   5   5   4   28.00    4.50
   5   5   4   37.30    4.90
  -5  -5  -5  122.29    3.80
  -5  -5  -5  126.69    3.80
  -5  -5  -5  126.79    3.70
   5   5  -5  124.89    3.60
   5   5  -5  127.59    3.60
   5   5  -5  134.69   12.60
   5   5  -5  116.99   14.00
  -5   5   5  120.99   12.80
   5  -5   5  104.09   10.50
   5  -5  -5  129.79    3.70
   5  -5  -5  123.59    3.80
   5  -5  -5  120.29   11.70
  -5   5  -5  136.99   11.50
  -5   5  -5  100.19    4.90
  -5   5  -5  118.19    4.40
  -5  -5   5  125.59    3.70
   5   5   5  134.79    6.90
   5   5   5  115.39    7.10
  -6   0   0  310.07   13.00
  -6   0   0  306.87    8.30
   0  -6   0  312.87   12.80
   0  -6   0  302.07    8.40
   0  -6   0  297.57    8.50
   0   0  -6  306.97   10.60
   0   0  -6  300.67   10.80
   0   0  -6  286.47    8.30
   0   6   0  323.97   13.30
   6   0   0  305.07   12.70
   6   0   0  277.97    8.40
   0  -6  -1  609.44   16.80
   0  -6  -1  576.94   16.80
   0  -6   1  615.54   20.90
   0  -6   1  595.04   16.80
   0   6  -1  645.74   21.50
   0   6   1  635.24   21.00
   1   0  -6  620.94   19.30
   1   0  -6  612.14   19.70
   1   0  -6  614.94   16.70
   6  -1   0  603.34   20.80
   6  -1   0  569.84   16.80
   6   1   0  657.13   20.90
  -1   0  -6  632.04   18.50
  -1   0  -6  596.74   16.70
   0  -6  -1  606.44   20.50
  -1   0  -6  616.94   18.20
  -6   1   0  620.34   16.70
  -6   1   0  589.34   21.10
  -6  -1   0  634.04   16.80
  -6  -1   0  634.44   20.90
   0  -6   2 6613.54  187.48
  -2   0  -6 6959.60  184.68
  -2   0  -6 7088.79  184.58
  -6   2   0 6663.73  187.78
   0   6   2 6786.82  187.68
   2   0  -6 6795.12  186.88
  -6  -2   0 6658.23  187.28
   6  -2   0 6971.60  187.78
   6   2   0 6835.02  187.48
   0   6  -2 6841.52  187.88
  -3   0  -6   33.20    1.20
   0  -6  -3   32.60    5.20
   0  -6  -3   35.30    1.10
   0  -6  -3   32.80    1.30
   0  -6  -3   33.00    1.50
   0  -6   3   39.20    6.00
   0   6  -3   41.90    5.80
   0   6   3   38.10    5.50
   3   0  -6   33.80    1.30
   6   3   0   32.30    5.50
  -3   0  -6   38.80    3.10
   3   0   6   32.90    1.30
   6  -3   0   37.90    6.20
  -6   3   0   36.30    6.60
  -6   3   0   35.00    1.70
  -6  -3   0   31.90    1.30
   6  -3   0   30.90    1.40
   6  -3   0   34.40    1.20
   6   3   0   29.30    5.60
   6   4   0   -2.00    5.00
   4   0  -6    5.40    5.30
   4   0  -6    1.60    0.50
   4   0   6    1.60    1.80
   6  -4   0    1.00    0.30
   0   6  -4    2.50    4.80
   6   4   0   -2.60    4.50
   6  -4   0   13.90    4.70
   0  -6  -4    1.20    0.50
   0  -6  -4    1.20    0.60
   4   0   6    1.50    0.50
   0  -6  -4    1.70    0.30
   0   6   4   -3.20    4.10
  -4   0   6   -6.40    5.00
  -6  -4   0    1.00    0.40
  -6   4   0    1.40    6.40
  -6   4   0    0.90    0.90
  -4   0  -6    1.10    0.40
  -4   0  -6    1.00    2.10
  -4   0  -6    1.20    0.40
  -4   0  -6    1.10    0.40
   0  -6   4    5.50    5.30
   0  -6  -4    8.20    4.50
   0  -6   5 2184.88   65.59
  -6  -5   0 2247.08   60.79
  -6   5   0 2247.58   66.39
   6   5   0 2147.39   65.49
  -6   5   0 2239.58   61.19
  -5   0   6 2244.38   66.29
   6   5   0 2154.98   64.89
   0  -6  -5 2212.68   63.99
   0  -6  -5 2264.97   60.79
   5   0  -6 2265.47   65.99
   5   0  -6 2308.97   60.79
   5   0  -6 2224.58   60.79
   5   0   6 2274.47   61.79
   6  -5   0 2254.67   66.39
   6  -5   0 2272.47   60.79
  -5   0  -6 2303.57   60.69
  -5   0  -6 2244.68   60.69
  -5   0  -6 2262.57   60.89
   0  -6  -5 2335.87   60.89
  -5   0  -6 2252.17   61.99
   0   6  -5 2241.58   65.99
  -5   0  -6 2263.97   60.69
   6   0  -1    3.90    3.70
  -6   0   1    5.00    4.50
  -6   0   1   -0.10    0.30
   6   0  -1    0.00    0.50
   0  -1  -6   -0.90    2.80
  -6   0  -1   -0.60    0.40
   1  -6   0    0.00    0.40
   1  -6   0   -0.40    0.60
   1   6   0   -5.40    4.60
   1  -6   0    4.20    3.60
   0   1  -6   -1.10    3.00
   0   1  -6   -0.70    3.40
  -6   0  -1   -2.50    4.30
   6   0   1   -5.00    3.90
  -6   0  -1   -0.30    0.30
   0  -1  -6    1.00    2.40
  -1  -6   0    1.10    3.10
   0  -1  -6    0.10    0.40
   0   1  -6    0.00    0.40
  -1   6   0    1.00    4.90
  -1  -6   0   -0.60    0.40
  -6  -1  -1  479.25   14.10
  -6   1   1  496.85   20.80
  -1  -1  -6  537.15   15.30
  -6   1   1  513.05   14.00
   1  -6   1  515.25   18.60
   6  -1   1  500.65   17.90
   6  -1   1  543.75   14.10
   6  -1   1  481.45   14.10
   6   1  -1  519.85   18.60
   1   1  -6  547.95   17.20
  -1  -6  -1  516.95   14.10
   1   1  -6  504.65   14.10
  -1  -6  -1  509.65   17.70
   1  -6   1  507.25   14.10
  -6  -1  -1  536.55   14.10
   1   1  -6  512.45   17.30
  -6  -1  -1  518.85   17.80
  -1   6   1  507.05   18.60
  -1  -1  -6  499.55   14.00
   1   6  -1  573.74   19.00
  -1  -1  -6  530.95   15.10
  -1   6  -1  519.15   19.00
   1  -6  -1  496.65   14.20
  -1   1  -6  523.35   16.30
   1  -6  -1  516.35   18.20
   6   1   1  530.95   17.80
   1   6   1  558.64   18.30
  -1  -6   1  521.95   18.30
  -1   1  -6  502.85   14.00
   1  -6  -1  510.25   14.10
   1  -1  -6  508.15   16.80
   1  -1  -6  500.95   14.10
  -6   1  -1  522.85   14.10
   6  -1  -1  483.15   14.10
  -6  -1   1  529.25   14.10
  -6  -1   1  489.05   18.60
  -6   1  -1  504.35   18.20
  -6   1  -1  484.35   14.10
  -1   6   2  124.79    8.50
   6  -2   1  125.99    3.50
  -6  -2  -1  117.09    3.60
   2   1  -6  121.09    7.50
   2   1  -6   91.29    8.30
   2   1  -6  119.49    3.60
   6  -2   1  112.59    3.60
  -6  -2  -1  118.59    3.60
  -6  -2  -1  133.59    8.20
   6   2  -1  142.69    9.30
   1   6  -2  135.39    9.70
  -6   2   1  127.49    9.90
  -6   2   1  118.49    3.50
  -1  -6  -2  118.29    3.60
  -2  -1  -6  111.59    3.50
   2  -1   6  113.49    5.70
   1  -6   2  134.09    9.20
   6  -2   1  130.49    8.50
  -2   1   6  123.49    7.40
  -1   6  -2  133.09    9.90
  -2   1  -6  125.59    3.50
  -2   1  -6  115.69    3.50
   6  -2  -1  117.99    3.60
   1  -6  -2  117.59    3.50
   2  -1  -6  117.49    3.50
  -6  -2   1  119.09    3.60
  -1  -6   2  106.19    8.60
  -6   2  -1  117.19    3.70
   6   2   1  141.89    8.10
   1  -6  -2  119.79    3.70
  -6   2  -1  134.79    9.30
  -6  -2   1  127.79    9.40
   6  -2  -1  116.99    9.10
   2  -1  -6  120.99    8.30
   1   6   2  124.89    8.10
  -2   1  -6  126.69    3.50
  -2   1  -6  130.79    6.30
   1  -6  -2  116.89    8.30
   2   1   6  128.49    3.60
   6   3  -1   10.60    5.00
   1   6  -3    9.70    5.80
  -1  -6  -3    8.70    0.90
  -3   1   6    6.20    4.50
   6  -3   1    8.20    0.80
   6  -3   1    9.80    0.60
  -1   6   3    3.90    4.70
   3   1  -6    9.60    5.00
  -1  -6  -3    3.10    4.20
  -1  -6  -3    9.00    0.60
  -3  -1  -6    7.90    0.70
   3   1  -6   13.10    4.80
   6   3  -1    9.80    5.40
   1  -6   3   16.80    5.40
   6  -3   1    5.20    4.90
  -6  -3  -1    7.60    0.70
  -6  -3  -1    8.60    0.80
  -1  -6  -3    8.30    0.80
   3   1  -6    8.00    0.80
   3  -1   6    9.20    2.60
   3  -1  -6    7.60    0.80
   3  -1  -6   -0.40    4.50
  -3   1  -6    8.90    0.70
   6  -3  -1    6.30    0.60
   1   6   3   15.70    4.70
   6   3   1    3.10    3.80
  -6  -3   1    9.40    0.80
   1  -6  -3    9.50    0.80
   3   1   6    8.30    0.70
  -1  -6   3    4.60    5.30
  -3   1  -6    7.60    0.70
  -1   6  -3   11.50    4.80
   6   3   1   15.30    4.70
  -6   3  -1   17.80    5.70
  -3   1  -6    8.40    3.10
  -3   1  -6    8.70    0.70
   1  -6  -3    8.40    0.40
   1  -6  -3    8.10    0.80
  -6   3  -1   11.00    1.10
   4  -1   6   40.70    1.50
   6  -4   1   34.40    6.70
   4   1  -6   38.80    1.50
  -4  -1  -6   39.10    1.30
  -6  -4  -1   37.50    1.50
  -6  -4  -1   39.50    1.50
  -1  -6  -4   38.10    1.50
   4   1  -6   43.10    6.80
   6   4  -1   31.70    6.50
  -1   6   4   35.90    5.60
   1  -6   4   37.80    6.40
   1   6  -4   36.80    7.20
  -6   4   1   34.60    6.70
  -6   4   1   33.90    2.00
   6   4  -1   42.20    6.30
  -4   1   6   35.10    6.20
   4  -1   6   37.50    3.70
  -1  -6  -4   38.10    1.30
   6  -4   1   36.00    1.50
  -4  -1  -6   39.00    1.40
  -4  -1  -6   37.80    1.30
   6  -4   1   39.90    1.30
  -1  -6  -4   37.70    5.20
   4  -1  -6   39.70    6.60
  -6  -4   1   38.80    1.50
   4  -1  -6   33.80    1.50
  -1   6  -4   35.00    7.10
  -6   4  -1   36.40    2.00
  -6   4  -1   35.30    7.50
   4   1   6   41.50    1.50
   6  -4  -1   35.10    6.00
  -1  -6   4   34.10    6.50
   1   6   4   41.90    5.50
  -4   1  -6   37.90    1.40
  -4   1  -6   46.90    5.20
  -4   1  -6   37.70    1.30
  -4   1  -6   38.20    1.40
   6   4   1   42.70    5.70
   4  -1  -6   38.20    1.50
   1  -6  -4   39.00    1.70
   1  -6  -4   35.90    5.70
   1  -6  -4   39.00    1.50
   6   4   1   32.00    5.70
   6  -4  -1   36.50    1.50
  -6   5   1   72.09    9.10
  -6   5   1   66.39    2.90
   5   1  -6   65.29    2.20
  -5  -1  -6   55.99    2.10
  -1  -6  -5   65.79    2.00
   1  -6   5   61.19    7.40
   1   6  -5   72.59    8.20
  -5  -1  -6   64.09    2.20
  -6  -5  -1   66.39    2.20
  -6  -5  -1   63.79    2.20
   5   1  -6   62.19    8.40
   6  -5   1   69.09    2.00
   6  -5   1   62.99    2.20
   6   5  -1   82.49    9.30
   6   5  -1   76.29    9.80
  -1  -6  -5   65.19    7.50
   5   1  -6   59.39    2.20
  -1  -6  -5   66.09    2.20
   6  -5   1   69.19    8.50
  -1  -6  -5   68.39    2.40
  -5   1   6   81.79   10.40
  -5  -1  -6   57.09    2.10
  -5  -1  -6   62.99    2.10
  -1   6   5   53.59    6.90
   5  -1   6   63.89    5.70
   5  -1   6   68.79    2.20
   1  -6  -5   66.59    2.30
   5  -1  -6   63.09    2.20
   1  -6  -5   65.79    2.20
   5   1   6   67.99    2.20
   6  -5  -1   69.99    8.70
   6   5   1   67.19    7.70
   1   6   5   59.59    7.00
   5  -1  -6   68.19    7.80
  -5   1  -6   65.99    2.40
  -5   1  -6   62.59    2.10
   6  -5  -1   66.39    2.20
  -5   1  -6   72.89    6.50
   1  -6  -5   51.09    6.50
  -5   1  -6   64.69    2.10
   6  -5  -1   62.39    2.00
  -1  -6   5   70.99    8.00
  -1   6  -5   63.29    7.90
  -6   5  -1   55.59    9.20
   5  -1  -6   68.19    2.20
  -6  -5   1   66.49    2.20
   6   5   1   69.39    8.50
   0   2   6 3380.06   91.09
   6   0   2 3413.16   92.59
  -6   0  -2 3235.68   92.39
   6   0  -2 3215.38   89.39
  -6   0   2 3264.77   93.79
  -2  -6   0 3265.57   92.89
   6   0  -2 3283.87   93.79
   0   2  -6 3298.17   89.39
   2  -6   0 3296.27   89.39
  -6   0  -2 3268.87   89.49
  -2   6   0 3375.16   93.69
   2  -6   0 3250.77   93.49
   0   2  -6 3381.16   92.09
   0  -2  -6 3491.75   91.19
  -2  -6   0 3405.56   89.49
   2  -6   0 3144.89   89.49
   2   6   0 3398.66   93.29
   2  -6   1 1060.59   29.50
  -2   6   1 1084.09   34.10
  -1  -2  -6 1079.59   29.50
  -1  -2  -6 1127.09   30.40
   1   2  -6 1099.29   32.60
   1   2  -6 1081.69   33.10
  -1  -2  -6 1144.19   30.30
   6   1  -2 1081.69   36.30
   2   6  -1 1087.09   33.80
  -2  -6  -1 1142.69   29.60
  -6  -1  -2 1118.29   29.60
  -6  -1  -2 1000.50   29.60
   2  -6   1 1053.29   33.90
   1   2  -6 1045.10   29.60
   6  -1   2 1072.59   33.00
  -1   2   6 1081.39   32.10
  -6  -1  -2 1146.49   32.90
  -6   1   2 1131.69   34.30
  -6   1   2 1110.19   29.50
   1  -2   6 1129.79   32.20
   6  -1   2 1170.28   29.60
  -6  -1   2 1062.19   34.50
  -6   1  -2 1069.29   29.70
   2  -6  -1 1072.39   29.60
   1  -2  -6 1084.29   29.60
   6  -1  -2 1062.29   29.60
   1   2   6 1152.88   29.60
  -2   6  -1 1058.49   34.30
  -2  -6   1 1035.80   33.40
   6   1   2 1072.09   32.60
   2  -6  -1 1093.09   29.50
  -1   2  -6 1093.09   29.60
   2  -6  -1 1031.40   33.40
  -6   1  -2 1076.99   33.10
   2   6   1 1070.99   33.60
  -1   2  -6 1095.19   29.50
  -1   2  -6 1136.69   32.30
  -1   2  -6 1082.39   29.50
   1  -2  -6 1081.09   32.10
   6  -1  -2 1105.29   34.10
   6  -1  -2 1097.79   29.50
  -2  -6  -2 1459.75   44.20
   2  -2   6 1516.65   43.50
  -2  -6  -2 1546.05   41.30
  -6  -2  -2 1507.75   41.20
   2   6  -2 1557.74   45.50
  -6   2   2 1515.05   46.20
   2   2  -6 1561.74   44.80
  -2   6   2 1518.15   45.60
   6  -2   2 1516.55   44.90
   6   2  -2 1484.15   45.90
   2  -6   2 1553.14   45.50
  -2  -2  -6 1534.95   41.20
  -2   2   6 1540.95   44.50
   2  -2  -6 1488.05   44.30
  -2   2  -6 1510.05   43.60
   2   2   6 1571.74   41.20
  -2   2  -6 1582.04   41.20
   6  -2  -2 1521.85   46.00
  -2  -6   2 1513.55   45.40
  -6   2  -2 1519.55   45.30
  -2   2  -6 1535.55   41.20
   6   2   2 1587.14   44.50
   2   6   2 1507.55   44.60
  -2   2  -6 1491.85   41.10
   6  -2  -2 1489.45   41.10
  -2   6  -2 1601.44   46.30
   2  -2  -6 1532.45   41.20
   2  -6  -2 1473.95   45.30
   2  -6  -2 1540.25   41.20
   2  -6  -2 1544.25   41.30
   6  -2  -2 1462.35   41.20
  -6   2  -2 1452.45   41.30
  -2  -6  -3  507.85   13.70
  -6   3   2  499.05   18.90
  -6   3   2  516.65   13.60
   3   2  -6  493.75   18.10
  -3  -2  -6  508.05   13.70
   2   6  -3  540.25   18.70
  -2  -6  -3  512.15   13.80
   3  -2   6  476.85   16.10
   6  -3   2  455.05   13.70
  -6  -3  -2  480.65   13.80
   6  -3   2  516.65   18.70
   6  -3   2  536.35   13.70
  -3   2   6  483.25   17.90
  -2  -6  -3  467.45   16.70
   6   3  -2  501.95   18.60
   6   3  -2  486.85   18.40
  -6  -3  -2  496.45   13.70
   3   2  -6  494.45   18.60
  -2   6   3  522.25   18.60
   2  -6   3  474.85   18.70
   2  -6  -3  505.05   13.70
   2  -6  -3  467.15   18.20
  -3   2  -6  518.65   13.70
   3  -2  -6  491.85   13.70
  -3   2  -6  521.75   13.70
  -3   2  -6  502.85   16.50
   6  -3  -2  494.25   13.70
  -6   3  -2  499.95   14.00
   6   3   2  522.55   17.00
   6   3   2  508.95   17.50
   6  -3  -2  524.45   19.40
   2  -6  -3  483.55   13.80
   6  -3  -2  483.05   13.60
   2   6   3  485.45   17.30
  -2  -6   3  493.55   18.70
  -2   6  -3  522.25   18.70
  -6  -3   2  466.45   13.70
  -6   3  -2  500.05   18.90
   3  -2  -6  517.05   18.50
  -3   2  -6  466.75   13.60
   3   2   6  535.15   13.80
  -4   2   6   31.80    6.40
   4   2  -6   44.40    7.00
  -2  -6  -4   37.50    1.50
  -2  -6  -4   33.80    1.40
  -2  -6  -4   35.10    5.00
  -6   4   2   34.60    2.10
  -6  -4  -2   37.20    1.50
   4  -2   6   43.20    5.40
   4   2  -6   30.60    6.50
  -2   6   4   39.80    6.40
  -4  -2  -6   38.90    1.40
   6  -4   2   41.00    6.60
   6  -4   2   37.30    1.50
   6   4  -2   39.40    1.20
   6   4  -2   33.00    5.50
   6   4  -2   46.90    6.30
   6   4  -2   38.10    1.20
  -2  -6  -4   36.70    1.30
  -6   4   2   39.10    8.00
  -6  -4  -2   40.40    1.60
  -6  -4  -2   38.20    1.50
   6  -4   2   40.40    1.40
   2   6  -4   34.90    7.40
   2  -6   4   42.00    6.80
   4  -2  -6   34.60    1.50
   4  -2  -6   40.40    1.50
  -4   2  -6   37.60    2.00
  -6  -4   2   36.80    1.50
  -6   4  -2   37.40    2.10
   4   2   6   39.20    1.50
   6   4   2   40.10    5.80
   2  -6  -4   36.00    1.40
   2  -6  -4   38.20    1.60
  -4   2  -6   37.20    1.40
  -6   4  -2   40.70    7.30
   6  -4  -2   28.10    7.00
   6  -4  -2   38.20    1.30
   6  -4  -2   36.80    1.50
  -4   2  -6   37.20    1.40
   6   4   2   41.40    5.30
  -2  -6   4   42.00    6.80
  -4   2  -6   41.50    5.10
  -2   6  -4   47.60    7.70
   2   6   4   46.10    5.50
   4  -2  -6   42.00    6.30
  -2  -6  -5  164.78    5.00
  -5  -2  -6  170.78    5.00
  -2  -6  -5  179.58    5.10
  -6  -5  -2  179.98    5.10
  -6  -5  -2  174.08    5.10
   6  -5   2  186.38   12.00
   6   5  -2  166.28   12.70
   5  -2   6  175.88    5.10
  -2   6   5  162.88   11.00
   2   6  -5  180.88    5.10
  -2  -6  -5  180.48    5.00
  -6   5   2  184.78   12.00
   2   6  -5  171.18   10.90
  -5  -2  -6  174.58    4.90
   5  -2   6  162.88    8.90
   6  -5   2  184.28    5.00
   6  -5   2  169.28    5.10
   6   5  -2  181.58   11.90
  -5  -2  -6  172.08    5.10
   2   6  -5  176.78    5.10
   5   2  -6  195.18   12.00
   5   2  -6  175.68   10.90
   5   2  -6  166.78    5.00
  -2  -6  -5  191.18    8.80
  -5  -2  -6  179.28    4.90
   2  -6   5  170.78   11.40
  -5   2   6  179.58   12.60
  -6  -5  -2  171.88    5.10
  -6   5   2  160.48    5.60
   6   5   2  179.18   10.20
   2   6   5  200.38    9.20
   6  -5  -2  162.88   12.50
   6  -5  -2  170.18    4.90
   6  -5  -2  175.48    5.10
  -5   2  -6  171.78    9.50
   5  -2  -6  170.88    5.10
  -2   6  -5  183.08   12.30
   2  -6  -5  171.28    5.00
  -5   2  -6  184.58    5.40
   5   2   6  174.08    5.10
   6   5   2  160.88    9.40
  -6   5  -2  184.18    6.40
  -6   5  -2  173.28    5.60
   5  -2  -6  164.48   11.90
   5  -2  -6  169.78    5.00
  -6  -5   2  167.88    5.00
  -6   5  -2  176.98   13.10
   2  -6  -5  175.18    5.20
   2  -6  -5  174.48   12.00
  -2  -6   5  182.78   10.60
  -6   0  -3   -4.30    4.00
   0   3   6    1.60    2.90
   6   0   3    3.10    3.60
  -3   6   0   14.30    6.10
   0   3  -6    2.80    4.20
  -6   0   3    2.90    4.70
  -3  -6   0   -2.90    4.30
   3  -6   0    2.10    4.10
   0  -3   6   -4.90    3.50
   3   6   0    5.60    4.90
   6   0  -3    5.10    4.30
   0  -3  -6   -0.10    3.00
  -1   3   6  621.44   15.80
   1  -3   6  568.44   19.20
  -6  -1  -3  562.94   15.90
  -6  -1  -3  549.65   15.80
   6   1  -3  575.94   15.90
  -3   6   1  589.24   21.30
  -6   1   3  592.84   20.90
   3  -6   1  538.35   15.80
   3  -6   1  532.95   15.90
   3   6  -1  577.44   20.10
   1   3  -6  567.24   15.80
   1   3  -6  604.14   19.90
   1   3  -6  588.64   15.90
  -6  -1  -3  570.14   18.80
  -3  -6  -1  596.14   15.90
   6  -1   3  573.84   19.10
   6  -1   3  608.24   15.90
  -1   3   6  590.04   18.90
  -1  -3  -6  610.14   17.10
  -1  -3  -6  584.34   15.90
   3  -6   1  580.14   21.10
   6   1  -3  611.84   20.90
  -6  -1  -3  564.94   15.90
  -1   3  -6  603.34   15.90
   3  -6  -1  554.34   15.90
   6   1   3  631.64   16.00
   3   6   1  580.74   19.80
  -6  -1   3  584.64   20.80
   6  -1  -3  559.24   20.50
   6  -1  -3  559.94   15.90
   1  -3  -6  561.84   15.90
   3  -6  -1  570.34   20.30
   3  -6  -1  568.84   15.80
   1  -3  -6  578.14   18.80
  -6   1  -3  577.34   16.00
   6   1   3  570.14   18.70
   1   3   6  604.04   15.80
  -3  -6   1  570.64   20.20
  -3   6  -1  598.54   21.60
  -6   1  -3  579.54   19.40
   1   3   6  594.04   17.20
  -1   3  -6  561.44   15.80
  -1   3  -6  596.64   15.90
  -1   3  -6  572.74   19.50
   6  -1  -3  580.54   15.90
   2   3  -6   40.00    1.40
   2   3  -6   39.50    6.20
   6  -2   3   34.60    5.30
   2   3  -6   41.90    1.40
  -3  -6  -2   41.90    5.10
   2   3  -6   36.40    5.90
  -6   2   3   29.40    7.20
   6  -2   3   43.00    1.50
   6   2  -3   35.40    8.70
  -6  -2  -3   37.20    1.50
   2  -3   6   42.80    4.80
  -6  -2  -3   39.70    1.50
  -6   2   3   39.00    1.30
   3   6  -2   41.00    6.70
  -2  -3  -6   41.20    1.50
  -3  -6  -2   40.70    1.60
   3  -6   2   35.40    5.40
  -3   6   2   31.00    5.70
  -6  -2  -3   41.90    1.50
  -3  -6  -2   39.70    1.40
  -2   3   6   45.80    5.70
   2   3   6   42.20    1.40
  -6   2  -3   39.70    5.90
   6   2   3   45.90    5.70
   3  -6  -2   42.30    1.50
  -6   2  -3   37.70    1.80
   6  -2  -3   50.09    7.00
  -3  -6   2   45.10    5.50
  -3   6  -2   40.80    7.30
   6  -2  -3   38.90    1.50
   3   6   2   39.90    5.30
  -2   3  -6   42.20    1.50
  -2   3  -6   48.80    5.80
  -2   3  -6   39.20    1.40
  -2   3  -6   41.50    1.50
   3  -6  -2   45.30    6.60
   2  -3  -6   40.60    5.70
   2  -3  -6   38.60    1.50
   6  -2  -3   38.90    1.40
   2  -3  -6   36.70    1.60
   3  -6  -2   39.10    1.60
  -6  -3  -3  422.06   11.50
  -6  -3  -3  411.16   11.50
  -3  -6  -3  417.26   11.50
   3  -3   6  405.16   14.90
  -3  -3  -6  425.46   11.50
  -6  -3  -3  417.16   11.50
  -6   3   3  425.56   11.30
  -3  -6  -3  408.06   15.00
  -3  -6  -3  417.56   11.50
  -3  -6  -3  430.36   11.60
   6  -3   3  423.06   16.10
  -3   6   3  416.76   16.50
  -6   3   3  413.16   17.00
   3   3  -6  411.96   16.60
   3   3  -6  409.56   16.90
   3  -6   3  428.26   17.10
   6   3  -3  439.96   17.10
   6   3  -3  432.36   17.00
  -3   3   6  414.96   16.10
   3   6  -3  419.86   16.40
   6  -3   3  433.16   11.50
  -3   3  -6  426.76   15.20
  -3   6  -3  448.16   17.80
   6  -3  -3  407.36   11.40
  -6   3  -3  410.16   11.80
  -3   3  -6  419.26   11.50
   6   3   3  428.46   14.40
   6   3   3  417.16   14.70
  -3   3  -6  375.76   11.80
  -3   3  -6  408.26   11.50
   6  -3  -3  423.16   11.60
  -6  -3   3  401.86   11.50
   3   3   6  427.06   11.50
   3   6   3  429.36   15.10
   3  -6  -3  404.56   16.80
   6  -3  -3  417.56   17.60
   3  -6  -3  404.06   11.60
  -3  -6   3  390.86   16.80
   3  -3  -6  388.56   16.00
   3  -3  -6  410.76   11.50
   3  -3  -6  408.26   11.50
  -6   3  -3  419.46   17.00
   3  -6  -3  415.36   11.50
  -6  -4  -3  123.29    3.70
  -4   3   6  127.69   10.50
   6  -4   3  123.89    3.60
   6  -4   3  111.49    3.60
   6   4  -3  120.99    3.40
   6  -4   3  118.29    9.80
  -3   6   4  125.79   10.60
   3  -6   4  115.79   10.30
   3   6  -4  121.49   11.20
  -3  -6  -4  120.39    7.90
  -3  -6  -4  119.29    3.60
  -6   4   3  115.29   12.10
  -4  -3  -6  122.99    3.60
  -4  -3  -6  124.49    3.70
  -3  -6  -4  120.69    3.70
  -3  -6  -4  115.29    3.60
   4   3  -6  108.99   10.30
   6   4  -3  120.99    8.90
  -6  -4  -3  121.59    3.70
  -6  -4  -3  120.69    3.60
   6   4  -3  120.29    3.40
   4   3  -6  114.09   10.90
   6   4  -3  135.09   11.40
   4  -3   6  118.69    8.30
   3  -6  -4  121.39    3.60
  -3   6  -4  129.79   11.30
   6  -4  -3  115.39    3.50
  -6  -4   3  118.39    3.60
   6   4   3  129.09    8.00
  -6   4  -3   98.89   10.70
  -4   3  -6  129.99    9.00
  -4   3  -6  121.09    4.10
   6  -4  -3  122.59    9.30
   6  -4  -3  119.89    3.70
   3  -6  -4  119.29    3.70
  -3  -6   4  124.59   10.70
   3   6   4  108.19    7.80
   4  -3  -6  122.39    3.60
   4  -3  -6  116.99    3.70
   6   4   3  122.99    8.20
   3  -6  -4  132.19   10.10
  -6   4  -3  123.69    4.10
   4   3   6  128.59    3.60
   6   5  -3  112.49   11.40
  -6   5   3  110.69   10.70
  -5  -3  -6  109.59    3.50
  -5  -3  -6  114.69    3.30
   3  -6   5  127.89   10.60
  -6  -5  -3  113.59    3.50
  -6  -5  -3  118.59    3.50
  -6  -5  -3  113.59    3.50
   6  -5   3  118.39    3.40
   6  -5   3  107.39    3.40
   6   5  -3  114.79    3.30
  -3   6   5  117.39   11.10
  -3  -6  -5  103.49    3.50
   6  -5   3  114.49   10.80
   6   5  -3  114.59    3.30
   5  -3   6  108.89    8.50
   5   3  -6  114.89   11.40
   5   3  -6   99.69    9.80
   5   3  -6  111.29    3.40
   3   6  -5  113.59    3.40
  -3  -6  -5  114.89    3.40
  -3  -6  -5  111.89    8.00
   3   6  -5  114.19    3.40
  -3  -6  -5  122.09    3.60
   6   5  -3  118.29   10.50
   3   6  -5  124.49   12.00
  -5  -3  -6  113.49    3.30
  -5  -3  -6  113.59    3.40
  -5   3   6  114.59   11.60
   3  -6  -5  117.19    3.60
  -5   3  -6  126.89    9.40
  -5   3  -6  110.59    3.90
   3  -6  -5  117.19    3.40
   6  -5  -3  114.79    3.60
   5  -3  -6  105.99   10.90
  -6  -5   3  117.29    3.50
   3   6   5  122.19    8.70
  -3  -6   5  113.89    9.30
  -3   6  -5  117.89   11.60
   6  -5  -3  107.39   11.80
   6  -5  -3  117.79    3.40
  -6   5  -3  107.59    4.60
   5   3   6  119.09    3.50
   5  -3  -6  112.29    3.50
   6   5   3  113.29    8.20
   6   5   3  109.69    9.40
  -6   5  -3  116.39   12.00
   5  -3  -6  117.69    3.40
  -6   5  -3  112.59    4.10
   0   4  -6  425.26   11.30
  -4  -6   0  408.26   15.70
   0  -4   6  419.16   15.70
   6   0  -4  399.86   17.30
   6   0  -4  402.06   11.40
   6   0   4  402.26   14.20
  -6   0   4  385.26   17.60
   0   4   6  423.46   11.20
   4  -6   0  411.56   17.10
   4  -6   0  379.06   11.20
   4  -6   0  398.66   11.40
   4   6   0  406.16   16.00
   0  -4  -6  404.86   11.40
  -6   0  -4  400.26   14.50
  -6   0  -4  407.46   11.40
   6   0   4  427.76   11.40
   0   4  -6  434.06   11.40
   0   4   6  403.66   14.10
   0  -4  -6  434.66   14.30
   0   4  -6  407.86   16.40
  -4   6   0  403.76   17.70
   0  -4  -6  435.96   11.40
  -4  -6  -1    3.70    0.60
   4  -6   1    1.50    0.60
   4   6  -1    4.60    5.20
   4  -6   1    7.10    5.90
  -4   6   1   -4.40    6.40
  -6  -1  -4    2.40    0.50
   6   1  -4    3.10    0.60
  -1  -4  -6    3.00    3.00
  -1  -4  -6    4.40    0.50
  -6  -1  -4    1.90    3.60
  -4  -6  -1    2.70    0.70
   1   4  -6    1.50    0.40
  -1   4   6    7.30    4.20
   1  -4   6    7.60    4.60
   1   4  -6    2.30    0.40
   6  -1   4    3.30    3.90
   6   1  -4    7.00    6.20
  -1  -4  -6    1.90    0.60
  -4  -6  -1    5.90    4.80
  -6  -1  -4    2.50    0.50
   1   4  -6    8.00    5.20
  -1   4   6    2.70    0.30
  -6   1   4   -6.10    6.30
   1   4   6    1.10    2.80
   6  -1  -4    1.80    0.50
  -1   4  -6    2.30    0.50
   1  -4  -6    2.40    0.60
   4  -6  -1    3.90    0.70
  -6  -1   4   -7.30    6.30
   6  -1  -4    1.90    0.50
  -6   1  -4    2.10    0.70
   4   6   1   -0.80    4.60
   6  -1  -4   -0.70    6.00
  -4  -6   1    8.40    4.20
   6   1   4    3.80    3.30
   6   1   4    2.00    0.50
  -6   1  -4    8.20    4.40
   4  -6  -1    0.50    6.00
   4  -6  -1    2.70    0.30
  -1   4  -6    2.10    0.50
  -1   4  -6   -2.80    4.80
  -1  -4   6   -4.00    4.60
   1  -4  -6    5.00    4.40
   1  -4  -6    1.70    0.50
   1   4   6    2.70    0.40
   4  -6  -1    2.90    0.50
  -4   6  -1   11.90    6.70
  -4  -6  -2   77.69    2.60
  -4  -6  -2   85.49    2.70
  -2  -4  -6   84.89    2.60
   4  -6   2   80.49    9.50
   2  -4   6   86.69    8.20
  -2  -4  -6   83.29    4.00
  -6  -2  -4   79.59    2.60
  -2   4   6   72.49    7.40
  -6  -2  -4   82.79    2.60
   2   4  -6   73.09    8.90
   2   4  -6   82.79    2.50
  -6  -2  -4   81.39    2.50
   4  -6   2   75.89    2.60
   4   6  -2   93.19    9.40
   6  -2   4   81.09    2.60
  -4  -6  -2   85.89    8.00
  -2   4   6   79.09    2.30
  -4   6   2   73.39    8.40
   2   4  -6   84.89    2.50
   6   2  -4   78.59    2.60
   6  -2   4   75.29    7.70
  -6   2   4   93.89   10.90
  -4  -6  -2   80.19    2.60
   6   2  -4   90.99   10.30
   4   6   2   74.69    7.30
  -2   4  -6   79.99    2.60
  -2   4  -6   76.69    2.50
   2  -4  -6   75.99    2.60
   2   4   6   81.49    2.50
  -2   4  -6   89.99    8.30
   2  -4  -6   79.59    2.50
   4  -6  -2   79.99    2.70
  -6   2  -4   96.79    8.00
  -4  -6   2   82.79    8.90
  -4   6  -2   99.19   10.80
   6  -2  -4   77.39    2.60
  -6   2  -4   83.49    2.80
   6  -2  -4   84.79    9.90
   6  -2  -4   77.59    2.50
   2   4   6   83.49    4.00
   6   2   4   81.79    5.60
   4  -6  -2   74.79    8.10
   6   2   4   86.29    5.90
  -2   4  -6   82.29    2.60
   6   2   4   85.09    2.60
   4  -6  -2   78.19    2.50
   2  -4  -6   73.89    7.50
  -6  -3  -4   44.40    1.70
   6  -3   4   46.70    1.70
   6   3  -4   53.39    7.60
   6   3  -4   51.99   10.10
  -6  -3  -4   45.20    1.70
   3   4  -6   54.49    7.60
   3   4  -6   46.00    7.70
  -3   4   6   45.80    1.40
  -3  -4  -6   46.70    1.70
   4  -6   3   37.10    7.00
   4   6  -3   37.00    7.80
  -6   3   4   51.99    8.70
   6  -3   4   53.49    6.30
  -4  -6  -3   45.10    1.60
  -4  -6  -3   48.60    1.80
   3   4  -6   47.30    1.60
  -6   3   4   44.30    1.40
  -4   6   3   49.10    8.10
  -3   4   6   44.60    6.60
  -6  -3  -4   45.40    1.70
   3  -4   6   45.90    5.80
   3   4  -6   47.10    1.60
  -4  -6  -3   47.10    1.70
  -4  -6  -3   52.19    6.60
   3   4   6   46.50    1.60
  -4   6  -3   46.00    6.90
   4   6   3   43.00    5.60
   6   3   4   44.90    5.60
   4  -6  -3   45.70    1.60
   4  -6  -3   39.90    7.50
  -6  -3   4   41.70    1.60
  -3   4  -6   49.60    7.00
  -3   4  -6   44.00    1.50
   6   3   4   56.99    5.50
   6  -3  -4   45.30    7.70
   6  -3  -4   43.60    1.60
   6  -3  -4   44.70    1.80
  -6   3  -4   59.39    7.30
  -6   3  -4   47.30    2.20
  -4  -6   3   49.30    7.40
   3  -4  -6   46.70    1.70
   3  -4  -6   53.29    1.90
   3  -4  -6   32.40    6.50
   4  -6  -3   45.80    1.90
  -4  -6  -4  106.29    3.20
  -4  -6  -4  111.09    3.30
  -4  -6  -4  104.69    3.20
   4  -4   6  103.69    9.40
   4   4  -6  105.89    3.10
  -6  -4  -4   98.89    3.00
  -6  -4  -4  105.99    3.30
  -6  -4  -4  108.69    3.30
   4   6  -4  121.29   11.70
   4  -6   4  110.79   10.50
   6   4  -4  102.89    3.00
   6   4  -4  119.69   11.50
   4   4  -6  109.19    3.10
  -4  -4  -6  107.39    3.20
   4   4  -6  113.39   11.10
   4   4  -6  116.49    9.70
  -4   6   4  125.59   12.10
  -4   4   6   87.69   10.70
  -6  -4  -4  111.59    3.20
   6   4  -4  106.19   11.90
   6   4  -4  103.99    3.00
   6  -4   4  105.49    9.40
  -4  -6  -4  108.49    7.80
  -4  -4  -6   99.19    3.20
  -6   4   4   94.29   10.70
   6  -4   4  107.19    3.20
  -6  -4  -4   97.89    3.00
   4  -6  -4  106.19    3.40
  -6   4  -4  104.09   10.40
  -6  -4   4  105.99    3.20
   4   4   6  108.79    3.20
  -4   4  -6   99.89    3.80
   4  -4  -6  106.19    3.20
   4  -4  -6  103.59    3.30
  -4   6  -4   97.89   11.30
   4  -6  -4  107.39    3.20
   6   4   4   99.69    8.00
   6   4   4  107.59    7.60
   6  -4  -4  106.49    3.30
   6  -4  -4  109.49    9.40
  -4   4  -6  101.29   10.10
   6  -4  -4  106.59    3.20
   4  -6  -4  106.19   10.60
   4   6   4  101.09    8.20
  -6   4  -4   94.89    4.40
  -6   5   4   43.80   10.00
   4   6  -5   54.89    1.80
  -6  -5  -4   49.10    1.50
  -5  -4  -6   51.89    1.90
  -4  -6  -5   50.59    1.80
   6  -5   4   43.70    8.00
  -4  -6  -5   49.50    2.00
  -4  -6  -5   52.69    1.90
  -6  -5  -4   50.09    1.90
  -6  -5  -4   53.59    2.00
   6   5  -4   45.40    9.70
   6   5  -4   52.49    1.70
   4   6  -5   56.79    9.20
   4   6  -5   54.49    1.80
   5   4  -6   49.99    1.70
   6   5  -4   52.29    1.70
  -6  -5  -4   48.50    1.50
   5   4  -6   51.09    1.70
  -5  -4  -6   52.39    1.90
  -6  -5  -4   53.19    1.90
   6  -5   4   53.29    1.80
   6  -5   4   49.80    1.90
   5   4  -6   60.99    9.70
   4  -6   5   46.00    8.10
   5   4  -6   45.10    8.70
   5  -4  -6   53.69    2.00
   5  -4  -6   50.79    1.90
   5   4   6   54.19    1.90
   6  -5  -4   64.89    9.20
  -4   6  -5   41.90    8.60
  -5   4  -6   52.39    2.60
  -5  -4   6   49.70    1.80
   4  -6  -5   53.39    1.80
   6  -5  -4   50.69    1.80
  -6   5  -4   49.30    8.80
  -6   5  -4   49.30    3.40
   4   6   5   66.89    6.90
  -6  -5   4   49.60    1.80
   6  -5  -4   51.09    2.00
   4  -6  -5   50.69    2.10
  -5  -6   0   -0.40    0.50
   5  -6   0    0.10    0.30
   5  -6   0    0.50    0.50
  -6   0   5    8.30    7.20
   0  -5  -6    0.00    0.50
  -5   6   0   -1.30    7.50
  -6   0  -5    3.50    3.90
  -6   0  -5    0.50    0.60
   6   0  -5    0.00    0.50
   6   0   5    1.20    3.40
   6   0   5   -0.50    0.50
   0  -5  -6    0.40    4.20
   5  -6   0   -4.80    6.70
   0  -5   6    7.30    5.40
   0   5  -6   -0.60    0.40
   6   0  -5   -9.80    6.40
   6   0  -5   -0.60    0.50
   5  -6   0    0.70    0.60
   0   5  -6   -0.80    5.80
   0   5  -6   -0.40    0.40
   0   5   6   -1.60    4.20
   0   5   6    0.70    0.30
   0  -5  -6    0.60    0.70
   5   6   0   -1.20    5.30
  -1   5   6  644.14   21.60
  -1  -5  -6  681.23   20.20
   1  -5   6  655.73   22.60
  -1  -5  -6  643.94   17.70
  -5   6   1  656.03   24.70
   6   1  -5  628.74   17.70
   6  -1   5  603.24   20.40
   1   5  -6  637.44   17.70
   1   5  -6  611.64   23.00
  -6   1   5  603.84   24.00
  -6  -1  -5  663.03   17.70
  -5  -6  -1  642.94   17.70
   6  -1   5  656.43   17.70
  -6  -1  -5  632.54   19.70
  -6  -1  -5  647.14   17.60
   5  -6   1  656.33   23.90
  -5  -6  -1  681.03   17.80
   5  -6   1  649.54   17.70
   5   6  -1  637.84   23.00
   1   5  -6  655.83   17.70
   6   1  -5  606.64   23.90
  -1  -5  -6  636.24   17.80
  -6  -1   5  615.64   24.10
   6  -1  -5  611.94   23.00
  -6   1  -5  646.14   17.80
   1   5   6  678.03   17.60
  -6   1  -5  635.84   21.00
   1  -5  -6  626.64   21.60
   1  -5  -6  651.23   17.70
   5  -6  -1  700.83   17.50
   5  -6  -1  641.84   17.50
   5  -6  -1  647.14   17.70
   5  -6  -1  641.54   23.90
   6  -1  -5  628.54   17.70
  -1  -5   6  646.54   22.80
   6   1   5  652.33   17.70
  -1   5  -6  662.83   23.00
  -1   5  -6  677.63   17.70
   6  -1  -5  647.44   17.70
  -1   5  -6  659.73   17.70
   1  -5  -6  631.54   17.70
   6   1   5  616.14   19.40
   5   6   1  644.64   22.40
   1   5   6  634.34   20.10
  -5  -6   1  655.33   17.70
  -5   6  -1  632.84   24.50
   6  -2   5   30.90    5.50
   6  -2   5   35.80    1.50
   6   2  -5   25.00    7.40
   6   2  -5   37.60    8.00
   6   2  -5   36.60    1.50
  -2   5   6   41.30    6.40
  -5  -6  -2   35.70    1.50
  -5  -6  -2   36.20    1.50
  -5  -6  -2   35.90    1.40
  -6  -2  -5   36.10    1.50
  -6  -2  -5   35.90    1.30
  -2  -5  -6   38.20    1.50
  -6  -2  -5   35.60    1.20
  -6  -2  -5   36.60    1.40
   2  -5   6   42.40    6.30
   5  -6   2   22.40    7.00
   5  -6   2   32.80    1.50
   5   6  -2   44.00    6.30
   2   5  -6   40.10    7.50
  -2  -5  -6   32.50    3.80
  -6   2   5   24.30    8.10
   2   5  -6   37.10    1.40
  -5   6   2   32.90    8.40
   2   5  -6   35.40    1.40
   5  -6  -2   36.70    1.60
   5   6   2   41.90    5.80
   6   2   5   37.10    1.50
  -6   2  -5   34.40    1.80
   6  -2  -5   34.80    1.50
   5  -6  -2   35.50    1.30
   2  -5  -6   36.20    1.60
   6  -2  -5   41.60    7.60
  -6   2  -5   31.80    5.80
   2  -5  -6   36.40    1.40
  -2   5  -6   35.80    7.10
   6   2   5   39.30    4.20
  -5  -6   2   34.30    1.40
  -5   6  -2   41.00    7.00
   6   2   5   40.70    4.30
   2   5   6   36.80    3.80
   5  -6  -2   36.60    7.60
  -2  -5   6   38.60    7.00
   6  -2  -5   35.60    1.40
   2  -5  -6   48.10    6.90
  -3  -5  -6  594.54   16.00
   6   3  -5  584.84   23.30
  -6  -3  -5  588.44   15.80
  -6  -3  -5  604.64   16.00
  -5   6   3  615.44   22.60
   3   5  -6  585.64   15.90
   3   5  -6  564.94   22.20
   5  -6   3  564.54   22.20
   5  -6   3  572.04   15.90
   5   6  -3  588.94   22.60
   5   6  -3  625.24   22.50
  -6  -3  -5  603.84   15.90
  -6  -3  -5  590.64   16.00
  -3  -5  -6  549.35   15.90
  -5  -6  -3  604.54   16.00
   6  -3   5  551.24   20.50
   6  -3   5  617.44   16.00
   6   3  -5  594.44   22.70
  -6   3   5  556.34   23.20
   6   3  -5  566.74   15.90
   3  -5   6  549.54   20.80
  -5  -6  -3  590.04   16.00
  -3   5   6  570.94   21.30
  -5  -6  -3  599.84   16.00
   3   5  -6  582.24   15.90
  -6  -3  -5  578.54   15.80
  -6  -3   5  539.45   15.90
   6  -3  -5  575.04   22.80
   5  -6  -3  601.84   16.10
  -5   6  -3  485.75   16.70
   6  -3  -5  600.64   16.00
   5   6   3  541.15   19.80
   5  -6  -3  598.34   15.90
  -5   6  -3  563.44   22.80
   3  -5  -6  606.64   15.90
   3  -5  -6  594.24   16.00
   6   3   5  594.14   17.40
   6   3   5  570.84   17.50
   6   3   5  612.74   16.10
  -6   3  -5  561.04   21.00
   3   5   6  582.54   17.10
   5  -6  -3  565.64   22.60
  -3   5  -6  579.04   22.10
  -3   5  -6  548.95   15.80
  -6   3  -5  582.54   16.30
   3  -5  -6  562.24   21.30
   6  -3  -5  582.54   15.90
  -6  -4  -5    2.10    0.60
  -5   6   4   -5.90    8.70
  -4  -5  -6    1.40    0.60
  -6  -4  -5    1.50    0.50
  -6   4   5    0.70    0.90
  -5  -6  -4    2.40    0.50
   4  -5   6    4.20    8.90
   4   5  -6    1.50    0.40
   4   5  -6    5.40    7.70
   4   5  -6    7.30    6.50
   4   5  -6    2.20    0.50
  -6  -4  -5    2.10    0.30
   6   4  -5    0.00    6.10
  -5  -6  -4    1.30    0.50
  -5  -6  -4    1.30    0.80
  -6   4   5    8.20    8.20
   5  -6   4    5.30    7.20
   5  -6   4    3.20    0.70
   5   6  -4    1.80    0.50
   5   6  -4    6.00    8.30
   5   6  -4    6.10    8.20
   5   6  -4    1.90    0.50
  -6  -4  -5    0.80    0.50
  -6  -4  -5    1.80    0.30
  -4  -5  -6    1.50    0.50
   6   4  -5    0.80    8.20
   6  -4   5    1.50    0.50
   6  -4  -5    1.80    0.90
   5   6   4    9.10    5.00
   6  -4  -5    1.20    0.60
   6   4   5    1.90    3.10
   6   4   5    1.00    3.40
   6  -4  -5    1.20    0.50
   4  -5  -6    1.50    0.70
   4  -5  -6    2.40    1.40
   5  -6  -4    0.60    7.40
   5  -6  -4    1.60    0.50
  -5   6  -4   -5.60    7.90
  -5   6  -4    0.50    1.70
   4   5   6    2.60    2.00
   4   5   6    1.70    1.70
  -6  -4   5    1.30    0.50
  -6   4  -5    1.70    1.80
  -6   4  -5    2.00    0.90
   5  -6  -4    1.20    0.70
   6  -4  -5   -2.30    7.40
  -6  -5  -5  161.98    4.50
  -6  -5  -5  161.18    4.80
  -6  -5  -5  163.28    4.80
  -6  -5  -5  160.38    4.80
  -6  -5  -5  164.78    4.50
   6   5  -5  166.58    4.60
   5   6  -5  168.78    4.70
   5   5  -6  163.78    4.70
  -6   5   5  157.08    5.10
  -5  -6  -5  163.78    4.80
  -5  -6  -5  170.88    4.80
  -5  -6  -5  165.38    4.80
  -5  -6  -5  155.08    4.80
  -5  -5  -6  159.88    4.80
  -5  -5  -6  150.28    4.90
  -5  -5  -6  162.68    4.80
  -5  -5  -6  160.48    4.80
   5   6  -5  172.28   14.90
   6   5  -5  164.98    4.60
   6   5  -5  179.58   12.40
   6   5  -5  175.48   15.30
   5   6  -5  169.88    4.70
   5   6  -5  183.08   15.60
   5   5  -6  152.88   14.20
   5   5  -6  155.68   14.60
   5   5  -6  159.98    4.70
   5  -5  -6  158.68    5.00
   5  -5  -6  168.08    4.80
   5  -5  -6  170.68    4.90
  -6   5  -5  182.18    5.50
   5   5   6  159.98    5.20
   5   5   6  161.98    5.30
   5  -6  -5  167.78    4.90
  -5  -5   6  157.28    4.70
   5  -6  -5  155.58    5.00
  -6   5  -5  141.69    6.00
   5   6   5  174.58    9.20
   6  -5  -5  167.48    4.70
   6  -5  -5  161.68    4.90
   6  -5  -5  158.88    5.00
  -5   5  -6  151.88    4.90
  -5   6  -5  161.48    4.90
   5  -6  -5  159.28    4.90
  -6  -5   5  164.48    4.80
   6   5   5  149.69    8.30
  -6  -6   0  547.75   14.90
  -6   0  -6  524.75   17.10
  -6   0  -6  529.85   14.70
  -6   0  -6  560.34   15.00
  -6   0   6  515.35   21.00
  -6   0   6  521.25   15.00
  -6   6   0  526.25   23.00
  -6   6   0  519.95   15.50
   0  -6  -6  522.65   18.90
   0  -6  -6  558.94   14.90
   0  -6  -6  562.54   15.00
   0  -6   6  553.24   20.90
   0   6  -6  536.95   20.40
   0   6   6  536.25   19.00
   6  -6   0  574.44   22.30
   6  -6   0  575.54   14.70
   6  -6   0  525.65   14.90
   6   0  -6  539.05   22.00
   6   0  -6  491.85   15.00
   6   0  -6  532.65   14.80
   6   0   6  532.95   16.80
   6   0   6  554.14   14.90
   6   6   0  539.65   21.10
   6   6   0  517.95   21.00
  -6  -6  -1  233.28    6.70
  -6  -6  -1  232.08    6.60
   6  -1   6  236.38    6.70
  -6  -1  -6  235.08    6.50
  -6  -1  -6  234.38    6.70
   6  -6   1  240.18    6.50
   6  -6   1  227.38    6.60
   6   6  -1  258.47   13.60
  -6   1   6  257.47   15.40
  -6   1   6  218.68    6.80
   6  -1   6  225.58   10.10
   6  -6   1  240.08   14.50
   6   1  -6  223.78   13.00
  -6   6   1  254.87   16.10
  -6   6   1  213.98    7.20
  -1  -6  -6  234.38   10.90
  -1  -6  -6  229.28    6.60
  -1  -6  -6  236.18    6.80
   6   6  -1  239.98   14.40
   6   1  -6  231.88    6.60
  -1   6   6  243.88   12.60
   1   6  -6  224.98    6.60
   1   6  -6  237.58   14.50
   1   6  -6  232.48    6.60
   1  -6   6  222.38   13.20
   1  -6  -6  229.08    6.70
   1  -6  -6  237.78    6.60
   1  -6  -6  240.28   12.70
   1   6   6  224.88   10.70
   6  -6  -1  230.78   14.90
  -1   6  -6  202.18   14.00
   6  -6  -1  228.18    6.50
   6  -6  -1  230.68    6.70
  -6   6  -1  217.98    7.50
  -6  -1   6  237.78    6.80
  -6   1  -6  216.38   10.30
   6  -1  -6  244.28   13.00
   6  -1  -6  228.28    6.60
   6  -1  -6  228.68    6.60
  -6   6  -1  234.98   15.60
  -6  -6   1  231.48    6.60
  -6   6  -1  220.18    7.20
  -1  -6   6  231.78   13.50
   6   1   6  232.78    7.80
   6   1   6  250.07    6.70
  -6   1  -6  232.08    6.80
   6  -6  -1  247.98    6.40
   6   6   1  212.58   12.10
   6   6   1  242.68   14.10
  -6  -6  -2  508.05   13.90
  -6  -6  -2  516.25   13.80
   6   2  -6  509.95   20.90
  -6  -2  -6  505.15   13.70
  -6  -2  -6  505.65   13.70
  -6  -2  -6  503.05   13.80
  -6  -2  -6  500.25   13.70
   6   6  -2  473.85   21.20
   6  -6   2  507.95   13.80
  -6   2   6  503.85   21.50
  -6   2   6  482.25   13.90
   6  -6   2  464.95   20.70
   6   2  -6  478.75   20.30
   6   2  -6  493.85   13.80
  -6   6   2  451.05   24.70
  -6   6   2  509.95   14.40
  -2  -6  -6  511.05   16.60
  -2  -6  -6  497.75   13.80
  -2  -6  -6  472.05   13.70
   2   6  -6  488.65   20.90
   2   6  -6  509.25   13.80
  -2   6   6  491.15   21.90
   6   6  -2  546.15   21.00
   6  -2   6  538.25   13.90
   6  -6   2  528.55   13.70
   2  -6   6  485.95   20.30
   2   6  -6  536.75   13.80
  -6   2  -6  527.25   14.10
   2  -6  -6  510.85   13.90
   2   6   6  497.05   16.80
   6  -6  -2  483.45   22.30
   6  -6  -2  501.35   13.70
   6  -6  -2  499.15   13.90
  -6   6  -2  524.15   22.20
  -2   6  -6  490.25   20.60
  -2  -6   6  477.55   20.40
   6  -2  -6  508.45   21.10
   6  -2  -6  491.65   13.80
   6  -2  -6  503.25   13.80
   2  -6  -6  517.15   13.80
  -6  -6   2  512.75   13.80
  -6   6  -2  445.66   14.60
  -6   6  -2  463.05   14.30
   6   2   6  521.85   13.90
   2  -6  -6  438.96   19.90
  -6  -2   6  500.05   14.00
   6   6   2  475.95   19.00
  -6  -6  -3   54.69    2.00
  -6  -6  -3   56.49    2.10
  -6  -6  -3   57.99    2.00
   6   3  -6   65.99    9.80
  -6  -3  -6   54.19    1.80
  -6  -3  -6   57.99    2.00
  -6  -3  -6   56.89    2.00
  -6  -3  -6   52.99    1.80
   6   6  -3   70.29   10.00
   6  -6   3   57.09    2.00
  -3  -6  -6   58.59    2.00
  -6   3   6   51.99    2.30
   3   6  -6   56.89    1.90
   6   3  -6   60.59   10.00
   6   3  -6   55.59    2.00
  -6   6   3   52.59   11.00
  -6   6   3   54.99    2.70
  -3  -6  -6   62.59    6.00
   6  -3   6   59.29    2.00
  -3  -6  -6   53.79    1.90
  -3  -6  -6   55.89    2.10
   3   6  -6   75.39   10.10
   3   6  -6   55.99    1.90
   6   6  -3   60.39    8.00
   3  -6   6   53.99    9.20
   6  -6   3   57.79    1.90
   6  -6   3   55.59    9.10
  -6   3  -6   55.89    2.60
  -6   6  -3   58.29   10.20
   3  -6  -6   52.49    2.20
  -3   6  -6   50.69    2.10
   3   6   6   54.39    6.20
   6  -6  -3   71.79    9.80
   6  -6  -3   56.69    1.90
   6  -6  -3   57.29    2.10
  -6   3  -6   47.30    3.60
   3  -6  -6   55.79    2.10
  -3   6  -6   18.00   13.50
   6  -3  -6   56.39    2.10
   6  -3  -6   53.69    2.30
   3  -6  -6   57.09    2.00
  -6  -6   3   58.39    2.00
  -6   6  -3   53.19    3.50
  -6   6  -3   52.59    2.80
   6   3   6   57.29    2.00
   3  -6  -6   54.09    1.90
  -6  -3   6   51.89    1.90
   6   6   3   60.19    8.50
  -6  -6  -4   -0.10    0.50
  -6  -6  -4    0.00    0.60
  -6  -6  -4    0.20    0.50
  -6  -6  -4   -0.30    0.60
   4   6  -6    0.40    0.50
  -6  -4  -6    0.40    0.30
  -6  -4  -6    0.10    0.50
  -6  -4  -6   -0.50    0.50
  -6  -4  -6    0.20    0.60
  -6  -4  -6    1.00    0.40
   6   6  -4    8.40    9.20
   6   6  -4  -21.20    9.20
  -6   4   6    0.10    0.90
   6  -4   6    0.40    0.50
  -6   6   4    3.70    1.10
  -4  -6  -6    0.30    0.50
  -4  -6  -6    1.10    0.60
  -4  -6  -6    0.40    0.50
  -4  -6  -6    0.70    0.60
   6   6  -4    0.60    0.40
   6   4  -6    7.00    9.10
   6   4  -6    0.20    0.60
   6   6  -4    0.40    0.40
   6  -6   4    1.20    0.70
   4   6  -6    0.80    0.50
   4   6  -6   20.90    9.30
  -6  -6   4    0.10    0.50
   4   6   6   -0.10    3.40
   6  -6  -4    0.80    0.50
   6  -6  -4    0.00    0.60
   6  -6  -4    0.30    0.70
   4  -6  -6    0.30    0.70
   6  -4  -6    0.00    0.50
   6  -4  -6    0.50    0.60
   6  -4  -6    0.10    0.70
  -6   6  -4   -0.20    1.70
   4  -6  -6    0.70    0.50
   4  -6  -6    0.40    0.50
   4  -6  -6   -0.30    0.60
  -6  -4   6   -0.10    0.50
  -6   4  -6    0.20    1.00
  -4   6  -6    1.30    0.70
  -6  -6  -5   57.99    1.70
  -6  -6  -5   58.19    2.20
  -6  -6  -5   60.09    2.20
  -6  -6  -5   58.69    2.10
  -6  -6  -5   58.19    2.10
  -6  -6  -5   57.19    1.80
   6   5  -6   58.29    1.90
  -6  -5  -6   58.29    1.80
  -6  -5  -6   57.19    2.20
  -6  -5  -6   60.19    2.10
  -6  -5  -6   60.49    2.10
  -6  -5  -6   55.59    2.10
  -6  -5  -6   58.69    1.80
  -5  -6  -6   61.99    2.20
   5   6  -6   58.89    2.00
   5   6  -6   56.19   11.50
  -6   5   6   59.19    2.50
   6   5  -6   58.09    1.90
   6   5  -6   71.99   11.50
  -6   6   5   58.29    2.70
  -5  -6  -6   58.29    2.10
   6   6  -5   34.70   11.50
  -5  -6  -6   61.29    2.10
  -5  -6  -6   59.69    2.20
   5   6  -6   59.19    3.60
   5   6  -6   60.89    2.00
   6   6  -5   59.59    1.90
   6  -6   5   57.29    2.20
   6   6  -5   63.19    2.00
  -6   6  -5   54.79    2.30
  -6   5  -6   57.49    2.30
  -6  -5   6   57.69    2.00
  -5   6  -6   55.99    3.10
  -5   6  -6   58.49    2.30
   5   6   6   49.99    5.50
   6  -6  -5   54.29    2.00
   6  -6  -5   59.49    2.10
   6  -6  -5   60.89    2.30
   6  -6  -5   58.49    2.40
  -6   5  -6   58.59    3.00
   6  -5  -6   59.79    2.00
   6  -5  -6   62.29    2.10
   6  -5  -6   60.19    2.20
   6  -5  -6   59.69    2.40
  -6  -6   5   58.49    2.10
   5  -6  -6   55.89    2.30
  -6   6  -5   53.59    3.70
   6   5   6   55.79    3.90
   5  -6  -6   57.29    2.00
   5  -6  -6   62.39    2.10
   5  -6  -6   59.79    2.30
  -6  -6  -6    0.70    0.60
  -6  -6  -6    0.60    0.60
  -6  -6  -6    0.70    0.50
  -6  -6  -6    0.20    0.60
   6   6  -6    0.20    0.40
   6   6  -6   -1.10    1.80
   6   6  -6    0.70    0.50
  -6   6   6   -0.80    1.00
   6  -6  -6    0.30    0.50
   6  -6  -6    1.00    0.50
   6  -6  -6    0.60    0.70
   6  -6  -6    0.60    0.70
  -6  -6   6    0.80    0.60
  -6   6  -6   -1.70    1.40
  -6   6  -6    1.40    0.80
   6   6   6    2.40    3.90
  -7   0   0   -1.50    5.60
  -7   0   0   -0.20    0.30
  -7   0   0    0.80    0.50
   0  -7   0    5.20    5.20
   0  -7   0   -0.30    0.50
   0  -7   0   -0.40    0.50
   0   0  -7    0.60    3.20
   0   0  -7   -1.90    3.60
   0   0  -7   -0.40    0.40
   0   7   0   -0.20    5.70
   7   0   0    0.20    5.10
   7   0   0    0.20    0.50
  -1   0  -7   -0.20    0.40
   0  -7  -1   -6.10    4.90
   0  -7  -1   -0.60    0.40
   0  -7  -1   -1.00    0.60
   0  -7   1    8.40    4.40
   0  -7   1    0.00    0.50
   0   7  -1   -1.60    6.00
   0   7   1    1.90    5.70
   1   0  -7    5.30    3.80
   1   0  -7    1.10    4.10
   1   0  -7   -0.20    0.40
   7  -1   0    9.90    5.40
   7  -1   0    0.20    0.50
   7   1   0    3.20    4.80
  -7   1   0   -6.30    5.70
  -7   1   0   -0.10    0.30
  -7   1   0   -0.80    0.60
  -1   0  -7    1.80    2.80
  -1   0  -7    1.50    3.10
  -7  -1   0    0.00    0.50
  -7  -1   0   -3.50    5.50
   2   0  -7    0.90    4.10
   7  -2   0   -3.70    5.40
   7  -2   0   -1.30    0.50
   7   2   0   -0.40    5.00
  -2   0  -7   -1.70    0.40
   0  -7  -2   -1.20    4.90
  -7   2   0   -2.30    6.40
   2   0  -7   -2.30    4.90
   2   0  -7   -2.20    0.40
   0  -7  -2   -1.60    0.40
   0  -7  -2   -1.20    0.60
   0  -7   2   -3.90    4.20
   0   7  -2   -0.30    5.00
   0   7   2   -5.90    5.20
  -2   0  -7   -1.80    2.50
  -7   2   0   -1.90    0.30
  -7   2   0   -1.70    0.60
  -7  -2   0   -1.50    0.50
  -7  -2   0   -1.60    0.40
  -7  -2   0   -6.50    5.40
   0  -7  -3   -1.30    0.60
  -7   3   0   -1.70    6.90
   0  -7  -3   -0.10    0.50
  -7  -3   0   -0.70    0.40
  -7  -3   0    0.20    0.40
  -3   0  -7    0.30    0.40
   7   3   0    1.10    5.00
   7   3   0   -2.20    5.60
  -7   3   0   -0.10    0.70
  -3   0  -7   -0.20    0.30
  -3   0  -7   -0.50    2.00
  -3   0  -7    0.30    2.10
  -3   0  -7   -0.20    0.40
   7  -3   0   -3.40    5.80
   0  -7   3   -6.80    4.40
   0   7  -3    5.50    6.90
   0   7   3    6.10    5.50
   3   0  -7   -5.90    5.70
   3   0  -7    0.30    0.50
   0  -7  -3   -0.30    0.30
   7  -3   0   -0.40    0.50
   0  -7  -3   -0.40    5.60
   7   4   0  -11.80    6.40
   4   0  -7    9.40    6.00
   0  -7  -4    0.60    0.30
  -7  -4   0    0.30    0.50
  -7  -4   0   -0.10    0.40
  -7   4   0    4.30    7.40
  -7   4   0   -1.00    1.30
  -7   4   0   -0.70    0.80
  -4   0  -7    0.00    0.40
  -4   0  -7   -0.60    1.70
  -4   0  -7   -0.30    0.40
  -4   0  -7   -0.40    0.70
  -4   0  -7   -0.60    0.40
   0  -7  -4    4.90    5.90
   7  -4   0    0.10    0.60
   0  -7  -4    0.70    0.50
   0  -7  -4    0.70    0.60
   0  -7   4   -5.80    4.70
   0   7  -4   -6.80    7.10
   0   7   4   -2.80    5.10
   7  -4   0   -2.20    6.60
   4   0  -7    0.50    0.50
   4   0  -7   -0.70    0.60
   4   0   7    0.00    0.40
   7   4   0   -1.50    5.70
   7  -4   0   -0.10    0.30
   5   0  -7    0.20    0.60
   0  -7   5    4.30    6.90
   7   5   0   -4.00    6.90
   5   0  -7    0.90    0.60
  -5   0  -7   -0.10    0.40
   5   0   7   -1.30    1.70
   5   0   7   -0.30    0.40
   7  -5   0   -0.70    7.70
   7  -5   0   -0.30    0.30
   7  -5   0    0.40    0.50
   7   5   0   14.80    6.70
   0  -7  -5    0.50    0.50
   0  -7  -5   -0.50    0.60
  -7   5   0  -19.60    8.20
  -7   5   0   -0.40    1.20
   0  -7  -5   -8.40    5.90
   0   7  -5   -1.40    7.50
   0   7   5    1.60    6.00
   5   0  -7  -12.40    7.00
  -7   5   0    0.30    1.00
  -7  -5   0    0.10    0.50
  -5   0  -7   -0.60    2.10
  -5   0  -7    0.00    0.50
  -5   0  -7   -0.20    0.70
  -5   0  -7   -0.40    0.40
  -5   0   7    0.50    0.70
   7  -6   0   -0.10    0.30
  -7   6   0    3.40   10.10
  -6   0  -7    0.10    0.70
   6   0  -7   -0.30    0.50
   6   0   7    0.20    0.70
   0  -7   6   -1.30    7.90
   0   7  -6   14.80    9.00
   0   7  -6   -0.20    1.40
   0  -7  -6   -0.70    0.70
   6   0  -7    0.00    0.60
  -6   0  -7    0.10    0.50
  -6   0   7   -1.60    0.70
   0  -7  -6    0.00    0.50
  -6   0  -7   -0.50    0.50
   7  -6   0    3.10    6.70
  -7  -6   0   -0.70    0.50
  -7  -6   0   -0.30    0.50
   0  -7  -6    0.30    0.60
   0  -7  -6   -1.10    0.70
   7  -6   0   -0.60    0.60
  -6   0  -7    0.10    0.50
  -7   6   0    0.00    1.20
  -7   6   0    1.10    1.40
   0  -1  -7   -0.40    0.40
  -1   7   0    6.00    6.20
   7   0   1   -3.20    4.70
   0   1  -7   -2.00    3.60
   0  -1  -7    0.70    3.40
  -1  -7   0    0.20    0.50
   1   7   0   -0.30    5.50
   7   0  -1    0.30    5.60
   1  -7   0    1.10    0.60
   0   1  -7    0.20    4.20
   0   1  -7   -0.20    0.40
   7   0   1    0.30    0.50
  -7   0   1   -1.90    5.90
   7   0  -1   -0.60    0.50
  -7   0  -1   -0.40    0.50
   1  -7   0    1.10    5.50
  -7   0  -1   -0.10    5.10
  -7   0   1   -0.70    0.30
  -1  -7   0    1.30    4.90
   1  -7   0   -0.20    0.50
   0  -1  -7    0.00    3.00
  -7   0  -1    0.50    0.40
  -7   0   1   -0.30    0.50
  -7  -1  -1  208.28   11.70
  -7  -1  -1  196.38    5.70
   7  -1   1  196.28    5.70
   7   1  -1  209.28   11.80
  -7  -1  -1  193.38    5.70
   7  -1   1  195.78   11.10
   1   1  -7  206.58   10.00
   1   7  -1  205.48   12.00
  -7   1   1  199.98    5.70
  -7   1   1  191.28    5.80
  -1  -7  -1  202.28   10.50
  -1  -1  -7  201.88    7.30
  -1  -1  -7  191.98   10.50
   1   1  -7  194.68    9.30
  -1  -1  -7  209.58    5.70
   1   1  -7  201.58    5.70
   1  -7   1  206.08   11.80
   1  -7   1  196.28    5.70
   1  -7   1  194.98    5.80
  -1   7   1  197.08   12.00
  -1  -7  -1  200.08    5.80
  -7   1   1  210.38   12.60
   1  -1  -7  211.48   10.00
  -1  -7   1  207.88   10.30
  -1   1  -7  195.58    5.70
  -1   7  -1  207.28   12.50
   7   1   1  210.78   11.40
  -1   1  -7  215.48    8.80
  -7   1  -1  203.88    5.70
   1  -7  -1  203.48   11.20
   1  -7  -1  195.68    5.70
   1  -7  -1  189.88    5.80
  -1   1  -7  205.78    9.30
   1  -1  -7  192.98    5.70
  -7  -1   1  204.58   12.00
  -7  -1   1  205.08    5.70
   1   7   1  206.08   11.40
   7  -1  -1  209.48   12.00
   7  -1  -1  197.08    5.70
  -7   1  -1  203.88   11.60
  -7  -1   1  195.48    5.70
  -7   1  -1  194.18    5.80
   2   1  -7  467.75   12.80
   7  -2   1  492.85   12.80
  -2  -1  -7  464.45   12.80
  -7   2   1  457.45   19.20
   2   1  -7  461.45   17.40
   2   1  -7  449.26   16.90
   1   7  -2  459.55   18.90
   7  -2   1  438.96   12.80
  -1   7   2  457.25   18.30
  -7  -2  -1  481.15   17.60
  -7  -2  -1  447.26   12.80
  -7  -2  -1  464.25   12.80
   7  -2   1  487.45   18.10
   1  -7   2  448.96   18.30
  -1  -7  -2  460.15   12.80
   1  -7   2  437.06   12.90
   7   2  -1  502.45   18.80
  -7   2   1  475.25   12.70
  -7   2   1  466.05   12.90
   1  -7  -2  495.05   18.00
  -2   1  -7  463.25   12.80
  -2   1  -7  466.05   15.20
  -2   1  -7  455.45   12.70
   1  -7  -2  472.45   12.80
   1  -7  -2  459.25   12.90
  -7  -2   1  455.95   12.80
   7  -2  -1  455.05   12.80
   7  -2  -1  436.56   12.70
   1   7   2  466.75   17.70
  -7  -2   1  462.45   12.80
  -7  -2   1  463.65   18.70
   7   2   1  465.05   17.40
  -1  -7   2  439.66   18.00
  -1   7  -2  471.05   19.10
   7  -2  -1  471.05   18.80
   2  -1  -7  479.75   16.90
   2   1   7  487.05   12.80
  -7   2  -1  484.65   13.00
   2  -1  -7  468.65   12.80
  -2   1  -7  477.55   12.80
  -7   2  -1  448.16   18.50
   3  -1   7 1144.59   33.10
   7  -3   1 1238.18   31.50
   1   7  -3 1126.09   37.50
   1  -7   3 1103.89   36.60
  -1  -7  -3 1179.58   31.40
  -7   3   1 1195.38   37.70
  -7   3   1 1143.59   31.60
  -3  -1  -7 1126.99   31.60
  -1  -7  -3 1103.19   35.30
   7  -3   1 1158.48   31.50
   7   3  -1 1148.39   35.80
   3   1  -7 1113.69   35.50
  -3   1   7 1113.89   35.70
  -7  -3  -1 1180.18   31.50
  -1   7   3 1131.79   36.70
  -7  -3  -1 1214.38   31.50
  -1  -7  -3 1228.98   31.50
   7   3  -1 1140.49   36.90
   3   1  -7 1193.08   31.50
   7  -3   1 1105.69   36.40
  -3   1  -7 1174.78   33.30
   7   3   1 1169.08   36.00
   1  -7  -3 1199.28   31.50
   1  -7  -3 1140.29   31.60
  -3   1  -7 1164.08   31.40
   3   1   7 1251.87   31.50
   7  -3  -1 1157.38   36.70
  -1   7  -3 1205.98   37.50
   7   3   1 1115.19   35.20
   1  -7  -3 1193.48   31.30
   3  -1  -7 1135.29   31.50
  -7   3  -1 1199.28   36.70
  -7   3  -1 1197.88   31.70
  -1  -7   3 1075.09   38.50
  -7  -3   1 1192.38   31.50
   1   7   3 1132.29   35.60
  -3   1  -7 1116.09   31.40
   7  -3  -1 1083.79   31.30
   7  -3  -1 1165.38   31.50
  -3   1  -7 1142.29   31.40
   3  -1  -7 1148.49   36.10
   1  -7   4   -6.30    5.00
   4   1  -7    1.00    0.50
  -7  -4  -1    0.90    0.50
   4   1  -7   -4.50    6.50
  -1  -7  -4    2.90    0.80
  -7   4   1    2.60    0.90
  -1   7   4    0.60    5.80
   7   4  -1    0.90    6.00
  -1  -7  -4    1.20    0.30
  -4  -1  -7    2.00    0.40
  -4  -1  -7    1.10    0.50
  -4  -1  -7    0.60    0.70
  -4  -1  -7    1.50    0.40
  -1  -7  -4    0.50    0.50
   4   1  -7    3.60    6.10
   4  -1   7    3.70    2.90
   7  -4   1   13.00    6.80
  -1  -7  -4    0.70    5.50
   4  -1   7    1.80    0.50
  -7  -4  -1    1.00    0.50
  -7   4   1    0.30    8.00
  -7   4   1    3.10    1.20
   7  -4   1    1.30    0.40
   7  -4   1    0.40    0.60
   1   7  -4   -4.20    7.40
   7   4  -1    3.30    6.70
   1  -7  -4    0.40    0.60
   1  -7  -4    1.30    0.50
  -1  -7   4    2.60    6.60
   4   1   7    1.40    0.50
  -4   1  -7    1.50    0.40
   7   4   1   -4.30    5.60
  -1   7  -4    6.70    7.10
  -7   4  -1   -0.40    0.90
   1  -7  -4    1.20    0.20
   4  -1  -7    1.50    0.50
   4  -1  -7    2.30    0.60
   7   4   1    5.20    5.30
  -4   1  -7    1.00    0.40
  -4   1  -7    1.60    0.90
  -4   1  -7    1.20    0.40
  -4   1  -7   10.80    3.60
  -7  -4   1    1.60    0.50
  -7   4  -1   -5.60    7.50
  -7   4  -1    1.90    1.30
   1   7   4   -3.10    4.90
   7  -4  -1    1.50    0.40
   1  -7  -4    5.90    5.90
   7  -4  -1   -8.00    6.80
   7  -4  -1    1.60    0.60
   5   1  -7   -6.80    6.70
   5  -1   7   -0.20    3.30
  -5  -1  -7    4.10    0.50
   5  -1   7    4.10    0.60
  -1   7   5   11.30    6.10
  -5  -1  -7    4.50    0.80
  -7  -5  -1    4.90    0.70
  -7  -5  -1    4.40    0.60
   7  -5   1    6.40    7.40
  -5  -1  -7    4.10    0.50
   7  -5   1    5.30    0.70
   7   5  -1    8.70    7.40
  -7   5   1    3.80    1.10
   1  -7   5   -4.20    6.70
   1   7  -5    1.20    6.10
  -7   5   1   15.10    9.50
   5   1  -7    4.70    0.60
  -5   1   7    2.70    8.70
  -5   1   7    5.50    0.90
  -1  -7  -5    0.70    5.50
  -1  -7  -5    4.30    0.50
  -5  -1  -7    4.20    0.60
   5   1  -7    5.40    6.80
   5   1  -7    3.90    0.60
  -7   5   1    6.90    1.30
  -1  -7  -5    3.80    0.60
  -1  -7  -5    4.50    0.80
   7   5  -1    6.10    8.40
  -5   1  -7    4.70    0.60
   5  -1  -7    4.10    0.60
   5  -1  -7    4.50    0.70
  -5   1  -7    1.20    3.80
  -5   1  -7    4.20    0.50
  -5   1  -7    4.00    0.50
   7  -5  -1    4.50    0.50
  -1  -7   5    1.40    6.90
  -7   5  -1    4.00    1.40
  -7   5  -1    4.50    1.10
   1  -7  -5    4.40    7.00
   7  -5  -1    4.40    0.70
   7   5   1   -3.00    7.00
   1  -7  -5    5.40    0.90
  -1   7  -5    1.60    7.90
  -5   1  -7    4.40    1.00
   1   7   5    8.30    5.70
   5  -1  -7    0.60    8.30
   5   1   7    4.80    0.60
   7  -5  -1    1.00    7.90
  -7   5  -1   11.00    8.80
   1  -7  -5    4.00    0.60
  -7  -5   1    5.00    0.70
  -7   6   1  751.22   30.00
  -6   1   7  719.13   20.80
   7  -6   1  821.62   20.50
  -1  -7  -6  740.63   20.50
  -1  -7  -6  737.73   20.70
  -7   6   1  697.43   21.10
  -6  -1  -7  765.52   20.50
  -1  -7  -6  740.73   20.60
   1  -7   6  687.73   27.30
   7  -6   1  757.92   20.70
  -7   6   1  766.52   21.20
   7   6  -1  698.63   28.00
  -7  -6  -1  739.13   20.70
   6   1  -7  783.62   20.70
  -7  -6  -1  709.83   20.60
   6   1  -7  758.72   20.60
   1   7  -6  765.42   28.50
   1   7  -6  692.03   21.20
  -6  -1  -7  778.32   20.70
  -6  -1  -7  745.73   20.50
  -7  -6  -1  805.52   20.70
  -1  -7  -6  777.32   20.70
   7  -6   1  722.33   27.20
  -6  -1  -7  762.12   20.50
   1  -7  -6  796.02   20.70
   7  -6  -1  738.83   28.80
   1  -7  -6  748.33   20.70
  -1  -7   6  708.73   26.50
  -1   7  -6  730.83   28.10
   1  -7  -6  801.02   20.80
   6  -1  -7  764.02   20.60
   6  -1  -7  750.92   20.60
  -6  -1   7  773.72   20.80
  -7   6  -1  746.63   21.40
   7  -6  -1  801.72   20.70
  -7   6  -1  734.73   21.10
  -1   7  -6  747.83   21.20
  -6   1  -7  735.63   20.40
  -1   7  -6  752.72   20.70
   1  -7  -6  735.83   20.60
   7  -6  -1  756.62   20.50
  -7  -6   1  802.52   20.70
  -7   6  -1  771.12   29.60
  -6   1  -7  796.82   20.90
   6   1   7  710.43   21.00
   0   2  -7   79.49    2.40
   0   2  -7   78.79    7.30
   0   2  -7   81.99    7.20
   0   2  -7   78.89    2.50
   7   0  -2   75.89    2.50
   0  -2  -7   77.69    2.50
  -2  -7   0   88.79    8.20
   2   7   0   73.09    9.10
  -7   0  -2   79.49    8.00
  -7   0  -2   79.49    2.50
   0   2  -7   81.79    2.40
  -7   0  -2   78.59    2.60
  -7   0   2   91.59    8.50
  -7   0   2   78.99    2.40
  -7   0   2   74.29    2.50
   2  -7   0   76.19    2.60
  -2  -7   0   78.39    2.60
  -2   7   0   84.59   10.00
   0  -2  -7   78.09    6.20
   7   0  -2   88.29    9.60
   7   0   2   81.39    7.60
   2  -7   0   79.49    9.30
   2  -7   0   77.59    2.50
  -2  -7  -1   22.80    5.30
   2  -7   1   23.50    1.40
  -7  -1  -2   26.60    1.10
  -7  -1  -2   24.70    1.20
   7  -1   2   32.10    5.70
   7  -1   2   26.50    1.10
   2  -7   1   25.50    6.60
  -7  -1  -2   27.80    5.80
   7   1  -2   24.60    1.20
  -2  -7  -1   25.80    1.30
   1   2  -7   26.00    1.20
   1   2  -7   23.20    4.90
  -2   7   1   19.00    6.80
  -1  -2  -7   24.80    3.10
  -1  -2  -7   24.50    2.80
  -1  -2  -7   25.70    1.10
  -7   1   2   25.00    1.00
  -7   1   2   23.30    1.30
  -1   2   7   25.90    4.60
  -7   1   2   28.40    7.50
   2  -7   1   24.50    1.10
   1   2  -7   23.20    5.40
   2   7  -1   28.30    6.60
   7   1  -2   22.60    6.90
   7  -1   2   24.30    1.20
   1  -2  -7   26.50    1.20
  -7   1  -2   24.60    1.40
  -7  -1   2   25.00    1.20
   2   7   1   12.70    5.60
   7  -1  -2   25.90    5.50
  -1   2  -7   25.70    1.10
   7  -1  -2   24.00    1.20
  -2  -7   1   34.80    5.10
  -2   7  -1   29.10    7.30
   2  -7  -1   30.40    6.60
   1  -2  -7   34.50    4.90
  -1   2  -7   30.80    4.80
  -7   1  -2   30.20    6.10
  -1   2  -7   26.40    1.10
   1   2   7   26.30    1.10
  -7  -1   2   18.80    5.70
   2  -7  -1   25.70    1.10
   2  -7  -1   25.10    1.40
   7   1   2   25.40    5.70
  -1   2  -7   26.20    1.10
   7  -1  -2   25.50    1.10
   7  -2   2  290.77   13.10
  -7   2   2  287.27   15.30
   2   2  -7  267.67   12.60
   2  -2   7  287.37   11.20
   2   7  -2  288.77   14.70
   2  -7   2  301.17   14.40
  -7  -2  -2  280.67   12.50
  -2  -2  -7  295.27    8.00
  -7  -2  -2  288.67    8.10
  -7   2   2  279.37    8.10
  -2  -7  -2  273.27   12.60
  -2   2   7  271.37   12.50
   7   2  -2  288.77   13.50
   2   2  -7  278.47    8.10
  -7   2   2  282.07    7.90
   7  -2   2  302.77    8.10
  -7  -2  -2  285.47    8.10
   2  -7   2  274.67    8.10
   7  -2   2  277.97    8.00
  -2   7   2  304.47   13.30
  -2  -7  -2  294.17    8.10
   2  -7  -2  292.77   13.90
   2   7   2  299.87   13.90
   2  -7  -2  288.77    8.20
  -2   7  -2  300.27   13.90
   7   2   2  289.37   12.40
   2  -2  -7  282.37   12.70
  -7  -2   2  284.77    8.00
  -7   2  -2  292.97   14.50
   7  -2  -2  279.47    8.10
   7  -2  -2  272.27    7.90
  -7  -2   2  291.57   13.60
   2   2   7  297.07    8.10
   2  -7  -2  288.97    8.00
  -2  -7   2  293.97   14.00
   7  -2  -2  291.57   14.60
  -2   2  -7  297.87    8.00
  -2   2  -7  302.27   11.80
  -2   2  -7  279.37    8.00
  -2   2  -7  289.77    8.00
   2  -2  -7  280.67    8.00
  -7   2  -2  284.47    8.20
  -2  -7  -3 1209.48   36.80
  -2  -7  -3 1235.48   33.00
   2  -7   3 1203.98   38.60
  -3   2   7 1198.38   37.30
   7   3  -2 1252.07   38.30
   7   3  -2 1263.57   39.20
   3   2  -7 1191.58   38.10
  -7   3   2 1201.08   39.40
  -7   3   2 1189.48   33.10
   2  -7   3 1136.89   33.00
   2   7  -3 1236.48   38.90
   7  -3   2 1170.58   37.80
  -7  -3  -2 1273.17   33.10
  -7  -3  -2 1225.48   33.00
  -7   3   2 1235.88   32.90
   7  -3   2 1192.98   33.00
   3   2  -7 1254.27   33.00
  -2  -7  -3 1248.98   33.00
   7  -3   2 1251.57   33.00
  -3  -2  -7 1263.77   33.00
  -2   7   3 1221.68   38.40
   3  -2   7 1165.78   35.40
   3   2  -7 1190.68   37.40
  -7  -3   2 1199.58   33.00
  -2  -7   3 1188.28   38.30
  -2   7  -3 1192.08   39.00
   3  -2  -7 1177.68   33.00
   3  -2  -7 1247.48   33.00
   3  -2  -7 1208.28   37.70
   7  -3  -2 1241.68   33.00
  -7   3  -2 1187.08   38.40
   2  -7  -3 1237.98   33.00
  -3   2  -7 1231.88   33.00
  -3   2  -7 1231.98   35.80
   7   3   2 1183.78   36.50
  -3   2  -7 1255.87   33.00
   2  -7  -3 1165.98   37.90
   3   2   7 1249.68   33.00
   2   7   3 1173.98   37.10
   7  -3  -2 1192.08   38.90
  -7   3  -2 1235.28   33.20
   7   3   2 1219.48   37.20
   7  -3  -2 1181.18   32.90
   2  -7  -3 1248.78   33.10
  -3   2  -7 1189.58   32.90
   7  -4   2    1.10    6.50
   7   4  -2   -6.40    5.40
  -2  -7  -4   -6.70    4.60
  -2  -7  -4   -0.10    0.30
  -4  -2  -7    0.60    0.60
  -7   4   2   -0.20    0.90
  -4  -2  -7   -0.20    0.50
  -4   2   7    8.80    6.90
   7  -4   2    0.60    0.60
   4   2  -7   -1.70    6.50
  -7  -4  -2    0.50    0.50
   7  -4   2    0.00    0.40
   2   7  -4   -2.50    7.50
   7   4  -2    0.60    0.30
   7   4  -2    0.10    5.20
  -7   4   2    1.20    1.00
   4   2  -7   -8.70    5.90
   2  -7   4    6.30    5.30
  -7  -4  -2    0.20    0.50
   4  -2   7    8.80    3.80
  -7   4   2   -7.00    8.10
   7   4  -2    0.30    0.30
   4  -2  -7    4.20   10.10
   7  -4  -2    2.30    7.10
   4  -2  -7    2.50    0.60
  -7  -4   2    1.00    0.50
  -7   4  -2   -7.00    5.50
   2   7   4   -5.10    5.30
   4   2   7   -0.10    0.40
   2  -7  -4    0.10    0.70
  -4   2  -7    0.60    0.50
  -4   2  -7   -2.10    4.40
   7  -4  -2   -0.40    0.40
   7  -4  -2    0.00    0.60
  -4   2  -7    0.00    0.40
  -4   2  -7    0.00    0.90
  -7   4  -2   -1.00    0.80
   7   4   2   13.80    5.50
   7   4   2   -3.00    5.80
  -2  -7   4   -6.30    6.80
  -7   4  -2    1.00    1.30
   4  -2  -7    1.00    0.60
  -4   2  -7   -0.20    0.40
  -2   7  -4   -2.80    7.50
   2  -7  -4    0.70    0.50
  -2  -7  -5  169.78    4.90
  -5  -2  -7  178.58    4.90
  -7  -5  -2  168.48    5.00
  -2  -7  -5  161.08    5.10
   7  -5   2  168.78    5.00
  -5  -2  -7  172.38    4.90
  -5  -2  -7  169.38    5.00
   7   5  -2  171.88   14.00
   7  -5   2  148.19   13.00
  -5  -2  -7  174.98    4.80
   7   5  -2  169.18   16.40
  -7  -5  -2  167.58    5.00
   5  -2   7  183.48    5.10
  -7   5   2  168.38   15.40
   2  -7   5  162.28   12.80
   2   7  -5  141.19   14.00
  -2  -7  -5  176.38    5.00
   7  -5   2  174.18    4.90
  -5   2   7  160.08    5.10
  -2  -7  -5  169.78   10.50
   5   2  -7  195.98   13.20
   5   2  -7  169.08   15.80
   5   2  -7  168.58    4.90
  -7   5   2  171.68    5.50
  -7   5   2  163.78    5.50
  -2  -7  -5  172.38    4.90
  -7  -5   2  166.08    5.00
  -5   2  -7  177.88    4.90
  -7   5  -2  177.88    5.60
   2  -7  -5  166.18    5.10
  -5   2  -7  170.68    5.00
  -5   2  -7  173.08    5.00
  -5   2  -7  163.98    5.30
   5  -2  -7  168.58    5.00
   5  -2  -7  168.18    5.00
   7  -5  -2  171.88    5.00
  -2  -7   5  181.28   11.40
  -2   7  -5  177.08   14.20
   2   7   5  160.18   10.40
   7  -5  -2  155.08   11.80
   7  -5  -2  169.28    4.80
  -2   7  -5  167.48    5.20
  -7   5  -2  173.28   12.10
  -7   5  -2  164.08    6.00
   5   2   7  176.28    5.00
   2  -7  -5  165.78    5.00
   7  -6   2  683.43   17.70
   7  -6   2  659.13   17.80
   7   6  -2  599.74   26.20
   2   7  -6  618.74   18.40
  -2  -7  -6  621.24   17.80
  -6  -2  -7  659.03   17.80
   6   2  -7  637.14   25.50
   6   2  -7  637.44   17.70
  -6   2   7  629.04   17.90
  -2  -7  -6  635.94   17.80
  -7  -6  -2  668.73   17.80
  -7  -6  -2  611.74   17.70
  -6  -2  -7  670.33   17.70
  -6  -2  -7  662.43   17.70
   2   7  -6  635.14   26.20
  -7   6   2  640.94   27.80
  -2  -7  -6  678.43   17.80
  -2  -7  -6  650.23   17.70
  -7  -6  -2  633.74   17.90
  -6  -2  -7  666.13   17.70
   7  -6   2  616.24   25.50
   6  -2   7  675.93   18.00
  -7   6   2  652.43   18.30
  -2   7  -6  652.83   17.90
   6  -2  -7  660.13   17.80
  -2  -7   6  602.04   25.20
  -2   7  -6  629.24   18.40
  -6   2  -7  697.93   18.10
   2  -7  -6  631.94   17.70
   2  -7  -6  655.23   17.80
  -7   6  -2  653.63   18.40
   7  -6  -2  598.94   26.00
   2  -7  -6  622.04   17.90
   2  -7  -6  671.23   18.00
   6  -2  -7  649.54   17.80
   7  -6  -2  651.33   17.60
   7  -6  -2  633.94   17.90
  -7   6  -2  648.04   18.70
  -7   6  -2  633.34   26.80
  -7  -6   2  668.23   17.80
   7   0  -3   -5.00    6.40
   3   7   0   -0.80    5.80
  -7   0   3    3.50    7.10
  -7   0   3    0.00    0.50
  -3  -7   0    2.00    4.80
  -3  -7   0    0.20    0.50
  -3   7   0   -2.50    6.80
   0   3   7    3.10    3.40
   0   3   7    0.40    0.30
   3  -7   0    1.10    6.30
   3  -7   0    1.10    0.40
   0   3  -7    0.30    0.30
   3  -7   0    0.00    0.60
   0  -3  -7   -0.60    0.50
   0  -3   7    3.30    4.40
  -7   0  -3   -5.50    5.10
  -7   0  -3   -0.40    0.40
   0   3  -7    2.00    5.20
   0   3  -7    0.10    0.40
   0   3  -7    0.20    0.30
   7   0  -3    0.70    0.50
   7   0   3    3.20    4.40
   7   0   3   -0.40    0.40
  -7   0  -3    0.70    0.50
   0  -3  -7    2.90    3.50
   7  -1   3  376.16   14.60
  -7  -1  -3  355.76   14.70
   7  -1   3  357.56   10.50
   7   1  -3  377.56   17.10
   7   1  -3  383.56   10.60
   3  -7   1  365.06   10.50
   3  -7   1  365.36   10.60
  -7   1   3  323.97   24.80
   1   3  -7  384.56   10.50
   7  -1   3  399.76   10.60
   1   3  -7  383.76   10.50
   1   3  -7  370.16   15.10
  -7  -1  -3  387.46   10.60
  -1   3   7  387.56   14.20
   1   3  -7  387.26   10.60
   3   7  -1  389.66   16.50
   1  -3   7  380.66   14.20
  -7  -1  -3  379.96   10.60
  -1  -3  -7  376.86   10.50
  -7   1   3  383.16   10.50
  -3  -7  -1  390.76   10.60
  -1   3   7  400.46   10.40
  -1  -3  -7  387.26   11.90
  -3  -7   1  372.96   15.80
   1  -3  -7  379.26   14.20
  -1   3  -7  384.56   10.50
  -1   3  -7  387.26   10.50
  -7  -1   3  369.76   16.20
  -1   3  -7  401.56   10.60
  -7  -1   3  358.76   10.50
  -7   1  -3  381.26   15.30
  -7   1  -3  390.86   10.70
   7  -1  -3  369.46   10.50
   7   1   3  358.46   14.30
   7   1   3  392.56   10.60
   7  -1  -3  364.26   16.40
   3  -7  -1  373.66   10.50
   7  -1  -3  384.36   10.60
   1  -3  -7  342.67   10.50
  -1   3  -7  393.86   15.10
   3  -7  -1  371.96   10.60
   1   3   7  398.06   10.50
   3  -7  -1  379.26   16.80
   1  -3  -7  399.86   10.50
   7  -2   3   83.39    2.70
  -7   2   3   87.69    2.60
  -7   2   3   84.89    3.00
   2   3  -7   78.79    9.70
  -2  -3  -7   90.89    2.70
  -7  -2  -3   85.69    2.80
   3  -7   2   81.89    8.90
   3  -7   2   82.69    2.80
   2   3  -7   87.59    2.70
  -2   3   7   94.19    8.60
   3   7  -2   85.29   10.50
  -3  -7  -2   86.29    8.20
  -3   7   2   87.89    8.80
   2  -3   7   86.29    7.50
   2   3  -7   85.39    2.60
   2   3  -7   89.79    9.70
   7  -2   3   83.59    9.20
   7  -2   3   89.69    2.70
  -3  -7  -2   88.59    2.80
   7   2  -3   84.09   10.80
  -7  -2  -3   86.39    2.80
   7   2   3   94.79    7.90
   3  -7  -2   82.59    2.80
   7  -2  -3   86.69    2.80
   2  -3  -7   83.09    2.80
   2   3   7   90.39    2.70
   2  -3  -7   84.29    8.50
  -7  -2   3   82.99    2.70
   2  -3  -7   88.99    2.70
  -7   2  -3   86.89    3.00
  -3   7  -2   83.19    9.70
  -3  -7   2   97.39    8.00
   3  -7  -2   87.49    2.70
   3   7   2   88.59    8.70
   7  -2  -3   86.09    2.60
  -2   3  -7   90.29    8.40
  -2   3  -7   84.59    2.60
  -2   3  -7   92.79    2.70
   3  -7  -2   83.59    9.70
  -7   2  -3   84.09   10.20
  -2   3  -7   90.29    2.70
  -3  -7  -3  433.26   11.60
  -7  -3  -3  426.96   11.60
   3   7  -3  419.66   18.60
  -7   3   3  394.06   11.70
  -3  -7  -3  448.96   15.90
   7  -3   3  398.96   17.40
  -3   3   7  402.86   16.60
  -3  -3  -7  430.06   11.60
   3  -7   3  390.36   16.90
  -7   3   3  426.76   11.40
  -3   7   3  404.06   18.50
   7   3  -3  432.36   19.00
   3  -3   7  429.76   15.50
   3   3  -7  400.06   17.20
   3  -7   3  396.56   11.60
   3   3  -7  423.26   18.00
  -7  -3  -3  420.76   11.60
  -7   3   3  421.76   22.60
  -7   3   3  416.06   12.00
  -3  -7  -3  411.46   11.60
   7  -3   3  412.06   11.50
   7   3  -3  394.06   18.00
   7  -3   3  443.76   11.60
  -3   3  -7  417.66   11.60
   3   7   3  430.36   16.70
  -3   3  -7  403.86   11.40
   7  -3  -3  420.26   11.60
   3  -7  -3  425.36   11.60
  -7  -3   3  413.36   11.50
  -3  -7   3  433.26   18.10
  -3   3  -7  415.36   11.60
   3  -3  -7  409.36   17.40
   3  -3  -7  433.66   11.60
   3  -3  -7  423.66   11.60
   7   3   3  396.96   15.30
   7   3   3  415.16   15.80
   7  -3  -3  419.36   11.50
  -3   3  -7  391.86   15.80
   3   3   7  428.66   11.60
   3  -7  -3  453.05   18.10
  -7   3  -3  400.96   17.70
   3  -7  -3  416.26   11.70
  -3   7  -3  436.46   19.20
  -7   3  -3  414.16   11.90
  -4  -3  -7  164.38    4.90
  -3  -7  -4  175.18    5.00
  -7  -4  -3  164.98    5.00
  -7   4   3  165.18    5.30
   7   4  -3  177.48   11.80
   7   4  -3  164.68    4.70
  -7   4   3  159.58    5.20
   3   7  -4  144.69   13.40
  -7  -4  -3  169.78    4.90
   7  -4   3  166.18    4.90
   7   4  -3  164.38    4.60
   7   4  -3  164.98   12.80
   4   3  -7  148.39   12.30
  -4   3   7  199.38   15.10
  -3  -7  -4  187.08   10.60
  -3  -7  -4  166.18    4.80
   4   3  -7  173.58   12.70
   3  -7   4  159.68   12.70
  -3  -7  -4  166.18    4.90
  -3   7   4  200.88   13.80
  -4  -3  -7  158.18    4.80
  -7  -4  -3  169.18    4.90
   7  -4   3  141.99   11.80
   7  -4   3  174.68    4.90
   7   4   3  185.48    9.90
  -7   4  -3  163.28    6.00
   3  -7  -4  161.38    5.00
   3  -7  -4  170.78    4.90
  -7  -4   3  168.58    4.90
  -7   4  -3  184.58   13.00
  -3  -7   4  156.28   12.60
   3  -7  -4  170.88   12.10
  -4   3  -7  167.08    4.90
  -4   3  -7  156.18    4.70
  -4   3  -7  168.28    5.40
  -4   3  -7  173.58    4.90
   4  -3  -7  166.48    4.90
   3   7   4  168.58   10.40
   4  -3  -7  161.88    4.90
  -7   4  -3  172.88    5.40
   7  -4  -3  170.58    5.00
   7  -4  -3  165.18    4.80
  -3   7  -4  151.68   13.70
   4   3   7  175.38    4.90
  -3  -7  -5   77.79    2.70
  -3  -7  -5   81.19    2.70
   7   5  -3   94.79   10.90
   7   5  -3   79.19    2.40
   7  -5   3   79.79    9.80
   7  -5   3   83.59    2.60
   7  -5   3   77.89    2.60
  -7  -5  -3   74.89    2.60
   3   7  -5   94.19    9.90
   5   3  -7   79.59   10.00
  -7  -5  -3   79.99    2.60
  -7   5   3   69.09    9.90
  -7   5   3   79.39    3.20
  -7   5   3   80.59    3.40
  -5   3   7   73.59    2.80
  -5  -3  -7   79.59    2.40
   3  -7   5   94.59   11.50
  -7  -5  -3   77.99    2.70
   7   5  -3   79.39    2.40
  -5  -3  -7   81.49    2.40
  -7  -5  -3   82.59    2.70
   5   3  -7   77.29    2.60
  -3  -7  -5   84.19    8.20
  -3  -7  -5   80.79    2.50
  -5  -3  -7   80.99    2.60
  -3  -7  -5   80.19    2.60
  -5  -3  -7   76.69    2.60
   7  -5  -3   76.49    9.90
  -7   5  -3   89.79    3.40
  -3   7  -5   75.79    3.60
  -3   7  -5   75.99    2.80
  -5   3  -7   82.19    3.20
   3  -7  -5   80.89    2.80
   5   3   7   80.69    2.60
  -7   5  -3   77.09   10.20
   3  -7  -5   81.89    2.60
   5  -3  -7   75.29    2.80
   3  -7  -5   74.19    2.80
  -3  -7   5   95.09    9.90
  -3   7  -5   62.09   10.50
   7  -5  -3   81.09    2.70
  -7  -5   3   80.49    2.60
   3   7   5   81.29    8.70
  -7   5  -3   74.49    3.80
   5  -3  -7   82.09    2.60
   5  -3  -7   77.49    2.70
   7  -5  -3   80.19    2.50
  -3  -7  -6  335.07   13.40
  -6  -3  -7  335.67    9.20
  -6  -3  -7  293.57    9.20
  -6  -3  -7  331.87    9.10
   3   7  -6  317.67   10.00
  -3  -7  -6  328.47    9.20
   3   7  -6  284.57   19.00
   6  -3   7  336.47    9.30
  -6   3   7  318.57    9.40
   6   3  -7  316.47    9.20
  -6  -3  -7  332.27    9.00
  -3  -7  -6  333.47    9.30
   6   3  -7  338.47   18.80
   7  -6   3  346.17    9.20
   7  -6   3  320.87    9.20
   7   6  -3  304.37   17.20
  -7  -6  -3  322.37    9.20
  -3  -7  -6  331.27    9.30
  -7   6   3  320.47    9.70
  -7  -6  -3  341.47    9.20
  -3  -7  -6  326.57    9.20
  -7  -6  -3  318.77    9.30
  -7  -6  -3  344.07    9.30
  -6  -3  -7  337.97    9.20
   7  -6  -3  331.97    9.30
   6  -3  -7  324.27    9.40
   3  -7  -6  308.37    9.10
   7  -6  -3  325.97    9.10
  -6   3  -7  332.97    9.40
  -3   7  -6  324.37    9.30
   6   3   7  341.67    9.40
  -6   3  -7  327.17    9.60
  -7   6  -3  303.07   10.20
  -7   6  -3  330.37    9.90
   3   7   6  334.87   13.40
   6  -3  -7  335.07    9.20
  -6  -3   7  346.97    9.20
   6  -3  -7  325.07    9.30
   3  -7  -6  346.77    9.20
   3  -7  -6  334.87    9.40
   3  -7  -6  326.07    9.40
  -7  -6   3  314.07    9.30
  -3  -7   6  328.27   18.70
  -3   7  -6  308.57    9.80
  -7  -6   3  329.37    9.20
  -4   7   0  139.49   12.70
   0  -4  -7  124.59    7.70
   0   4   7  122.19    3.50
   4  -7   0  120.79   13.00
   4  -7   0  116.49    3.50
   4  -7   0  118.59    3.70
   4   7   0  117.39   10.60
   7   0  -4  117.19   11.50
   0   4   7  118.09    7.50
   7   0  -4  120.89    3.70
   7   0   4  119.59    8.20
   0  -4  -7  121.89    3.60
   0  -4  -7  121.09    3.70
   0  -4   7  105.69    9.00
   0   4  -7  116.79    3.60
   0   4  -7  140.29   10.00
   0   4  -7  117.89    3.60
  -7   0  -4  132.99    8.90
  -7   0   4  124.69   12.40
  -7   0   4  122.99    4.00
  -4  -7   0  121.59    9.70
   7   0   4  122.79    3.70
   1   4  -7   67.49    2.30
   1   4  -7   80.49    9.30
  -4   7   1   79.69   10.10
  -4  -7  -1   70.49    2.40
   4  -7   1   67.09    2.20
   1  -4   7   85.99    9.00
  -7   1   4   64.19    2.60
   4  -7   1   64.09    7.70
  -7   1   4   73.29    9.90
  -1   4   7   77.69    7.70
  -1   4   7   70.29    2.10
  -7  -1  -4   71.19    2.40
   7   1  -4   91.69   11.30
  -7  -1  -4   68.09    7.20
  -1  -4  -7   74.39    5.60
   7  -1   4   69.59    7.90
   7  -1   4   73.19    2.40
   1   4  -7   71.39    2.30
   4   7  -1   72.59    8.70
   7   1  -4   71.89    2.40
  -1  -4  -7   71.49    2.30
   7  -1   4   65.79    2.30
  -7  -1  -4   70.09    2.30
  -1  -4  -7   68.99    2.50
   4  -7   1   66.19    2.40
   4  -7  -1   63.09    8.80
   1   4   7   76.19    5.30
  -1   4  -7   69.19    2.30
   7  -1  -4   89.49   11.20
   7  -1  -4   70.49    2.30
   7   1   4   66.69    6.70
   7   1   4   72.99    2.40
  -4   7  -1   98.99   12.10
   4  -7  -1   71.99    2.20
   1  -4  -7   70.69    2.30
   1   4   7   73.39    2.20
  -1   4  -7   72.89    2.30
  -4  -7   1   60.39    7.60
   4   7   1   69.09    7.60
   1  -4  -7   73.29    7.70
  -7  -1   4   67.99    9.80
  -7  -1   4   74.89    2.70
  -7  -1   4   68.19    2.30
  -7   1  -4   77.59    8.80
  -7   1  -4   72.69    2.50
   1  -4  -7   68.29    2.50
   7  -1  -4   68.09    2.40
  -1   4  -7   72.49    2.30
  -1   4  -7   72.69    8.60
   4  -7  -1   69.09    2.50
   2   4  -7   38.30    7.40
  -7   2   4   41.60    1.40
  -7  -2  -4   41.40    1.60
  -7  -2  -4   42.60    1.60
   2   4  -7   43.40    1.50
   7  -2   4   34.60    6.70
   7  -2   4   41.50    1.60
   7  -2   4   37.50    1.60
   7   2  -4   43.50    8.70
   7   2  -4   41.60    1.60
   4   7  -2   52.29    8.60
   4  -7   2   40.10    1.70
  -4  -7  -2   41.60    6.30
  -4  -7  -2   42.10    1.60
  -4  -7  -2   38.80    2.00
  -4  -7  -2   41.50    1.60
  -7   2   4   42.70    9.30
  -7  -2  -4   39.30    1.60
   2  -4   7   31.90    5.70
   2   4  -7   43.00    1.50
   2   4  -7   40.00    7.00
  -2  -4  -7   40.00    1.60
  -2   4   7   39.20    6.70
  -2   4   7   41.40    1.30
   4  -7   2   55.19    8.30
  -7   2   4   37.90    2.00
  -4   7   2   48.10    9.20
   2  -4  -7   40.70    1.70
  -4  -7   2   32.00    7.40
   7  -2  -4   42.20    1.50
  -2   4  -7   43.00    1.60
  -2   4  -7   41.90    6.60
   7   2   4   42.20    5.30
   4  -7  -2   44.90    7.90
   4  -7  -2   40.00    1.50
   4  -7  -2   41.80    1.80
  -4   7  -2   43.20    7.50
  -2   4  -7   38.80    1.50
  -7  -2   4   36.40    1.80
   2  -4  -7   43.80    6.90
  -7  -2   4   38.90    1.50
  -7   2  -4   37.10    6.80
  -7   2  -4   40.70    1.90
   7  -2  -4   41.40    1.60
  -2   4  -7   42.50    1.60
   2   4   7   42.00    1.50
   7  -2  -4   39.80    8.30
   4   7   2   44.10    6.70
  -4  -7  -3    4.30    0.60
  -3  -4  -7    4.70    0.60
  -3   4   7    3.80    0.40
   4  -7   3    6.90    7.70
   4  -7   3    3.30    0.70
  -4   7   3   11.60    8.40
  -7  -3  -4    3.20    0.60
   3  -4   7    6.70    8.30
  -7  -3  -4    4.40    0.70
  -7  -3  -4    5.10    0.70
   7  -3   4    5.00    0.60
   3   4  -7    3.70    0.50
   4   7  -3   -4.30    7.80
   7   3  -4    5.10    8.00
  -7   3   4    0.70    9.20
  -7   3   4    4.90    1.00
  -7   3   4    3.90    0.50
  -4  -7  -3    6.10    5.50
  -4  -7  -3    3.30    0.50
  -4  -7  -3    2.40    0.60
   7  -3   4    3.60    0.60
   3   4  -7    8.40    7.00
   7  -3   4    6.40    6.00
  -3   4   7   13.40    6.50
   3   4  -7    3.60    0.50
   3   4  -7   -0.50    7.10
   7  -3  -4    4.30    0.50
  -7  -3   4    5.20    0.90
   7  -3  -4    8.30    8.00
   7  -3  -4    4.20    0.70
  -3   4  -7    4.30    0.50
  -3   4  -7    3.90    0.70
   3  -4  -7   -3.00    6.60
  -4  -7   3    3.20    7.20
  -4   7  -3    0.90    8.40
  -7   3  -4    3.30    1.70
   7   3   4    5.30    4.20
   7   3   4   -4.30    4.80
  -4   7  -3    3.00    1.70
  -3   4  -7    4.60    0.60
   4  -7  -3    4.80    7.50
   4  -7  -3    4.60    0.60
   4  -7  -3    2.50    0.70
  -7   3  -4    3.40    0.90
  -7  -3   4    4.00    0.60
  -7   3  -4   12.10    6.70
   4   7   3    5.60    5.90
   3   4   7    4.10    0.60
   3  -4  -7    4.30    0.60
   3  -4  -7    4.00    0.70
   4   4  -7   19.90    1.00
   7  -4   4   21.60    1.10
   7  -4   4   19.00    1.20
   7   4  -4   38.60    9.50
   4   4  -7   20.10    1.00
   4   4  -7   30.60    8.40
   4  -7   4    7.00    6.30
   4  -7   4   19.40    1.40
  -7   4   4   37.30   10.10
  -4  -7  -4   17.60    1.20
  -7  -4  -4   20.00    1.20
  -4  -4  -7   21.30    1.10
  -4  -4  -7   20.40    1.20
  -4  -7  -4   21.00    1.10
  -4  -7  -4   22.20    1.20
  -4  -7  -4   21.40    1.10
  -7   4   4   17.70    1.70
  -7  -4  -4   19.10    1.20
  -7   4   4   19.90    1.60
  -4  -7  -4   28.20    5.90
  -7  -4  -4   21.00    1.20
   4   7  -4    9.90    7.00
  -7  -4  -4   23.10    1.30
  -4  -7   4   17.00    8.00
  -4   7  -4   26.60    9.40
  -4   4  -7   19.10    1.00
  -7  -4   4   21.60    1.50
  -4   7  -4   21.60    1.50
  -7   4  -4   19.10    2.10
  -7   4  -4   22.00    1.90
   4  -4  -7   20.10    1.10
   4  -7  -4   22.30    1.30
   4  -4  -7   19.80    1.50
  -7  -4   4   20.70    1.10
   4   7   4   14.90    5.80
   7  -4  -4   30.30    8.70
   7  -4  -4   20.00    1.10
   7  -4  -4   21.30    1.30
   4  -7  -4   19.40    1.10
   4  -4  -7   22.20    1.30
   4   4   7   22.40    1.10
  -7  -5  -4  388.46   10.60
   7   5  -4  385.66   10.40
  -7   5   4  372.76   10.90
  -7  -5  -4  378.16   10.70
  -5  -4  -7  385.16   10.50
  -5  -4  -7  351.26   10.50
   5   4  -7  365.26   19.20
  -4  -7  -5  398.46   10.60
  -4  -7  -5  390.56   10.50
  -4  -7  -5  377.26   10.60
   5   4  -7  380.96   10.50
   5   4  -7  378.86   10.40
   5   4  -7  341.57   11.40
   7  -5   4  400.86   10.60
   7  -5   4  369.26   10.50
   7   5  -4  381.86   10.40
   5   4  -7  381.86   10.50
  -7  -5  -4  379.76   10.50
   7   5  -4  401.26   20.70
  -4  -7  -5  377.16   10.60
   4   7  -5  386.76   20.00
  -5  -4  -7  364.76   10.70
  -5   4   7  354.86   10.70
   4  -7  -5  385.26   10.50
   5  -4  -7  386.16   10.60
  -5   4  -7  357.46   10.60
   5  -4  -7  388.76   10.60
   5  -4  -7  366.26   10.70
  -7  -5   4  374.26   10.70
   4  -7  -5  383.16   10.70
   4  -7  -5  363.86   10.70
  -4   7  -5  361.76   11.00
   5   4   7  392.26   10.60
   7  -5  -4  385.56   10.50
   7  -5  -4  395.36   10.60
  -7  -5   4  384.46   10.50
  -7   5  -4  352.76   11.50
  -5  -4   7  367.76   10.40
  -7   5  -4  380.36   11.10
  -5   4  -7  377.26   11.10
  -4   7  -5  381.76   10.70
   5  -4  -7  383.36   10.50
  -4  -7  -6    1.70    0.60
  -4  -7  -6    1.00    0.50
   6   4  -7    0.00    0.60
  -6  -4  -7    1.10    0.60
  -6  -4  -7    0.40    0.60
  -7  -6  -4    0.20    0.50
   7   6  -4    7.10   11.10
   7   6  -4    0.30    0.40
   6   4  -7    2.10    1.70
  -4  -7  -6    0.90    0.60
  -4  -7  -6    0.80    0.70
   4   7  -6    1.00    0.50
   4   7  -6   -6.20    7.90
   4   7  -6   -0.60    1.50
   4   7  -6    0.70    0.50
   7  -6   4    1.00    0.50
  -7   6   4    0.60    1.10
  -7  -6  -4    0.70    0.50
  -7  -6  -4    1.50    0.60
   6   4  -7  -22.00   10.00
   7  -6   4    0.50    0.70
   7   6  -4    0.70    0.50
  -7  -6  -4    1.00    0.60
   6  -4   7    0.50    0.50
  -6   4   7    2.00    0.90
  -6  -4  -7    2.50    0.60
  -6  -4  -7    0.60    0.60
   4  -7  -6    0.70    0.50
  -6  -4   7    0.30    0.60
  -6   4  -7    0.10    0.60
   6   4   7    0.50    0.50
   4  -7  -6   -0.20    0.70
   4  -7  -6    0.80    0.50
  -7   6  -4    0.40    1.10
   6  -4  -7    0.20    0.60
  -4   7  -6   -0.70    0.70
   6  -4  -7    1.20    0.60
  -7  -6   4    0.70    0.50
   6  -4  -7   -0.30    0.50
  -4   7  -6   -1.80    1.40
  -6   4  -7    1.80    1.10
  -7   6  -4    1.10    1.70
   7  -6  -4    0.10    0.80
   6  -4  -7   -0.20    0.70
  -7  -6   4    0.40    0.80
   4  -7  -6    0.40    0.70
   7  -6  -4   -0.10    0.50
   7   0  -5   -0.80    0.60
   5   7   0    3.90    8.80
   7   0  -5   15.70    8.10
  -7   0   5   -1.50    8.60
   7   0  -5   -0.10    0.50
   5  -7   0   12.90    7.90
   7   0   5   -0.60    0.40
   0  -5  -7   -1.30    0.70
   5  -7   0   -0.20    0.50
   5  -7   0   -0.40    0.70
   0   5   7   -0.60    0.30
   5  -7   0   -0.60    0.30
  -7   0   5    0.60    0.70
  -5  -7   0   -0.40    0.50
  -5   7   0    1.40    8.80
  -7   0  -5   -0.20    0.60
   0  -5   7    5.80    6.30
   0  -5  -7   -0.80    0.50
   7   0   5   -1.30    4.70
   0   5   7   -5.20    4.40
   0  -5  -7  -10.20    4.70
   0   5  -7  -10.60    6.40
  -1  -5  -7  124.49    3.90
   7  -1   5  134.39    3.90
   5  -7   1  128.39   12.50
  -5  -7  -1  126.39    3.80
   1   5  -7  130.39    3.80
   5  -7   1  125.19    3.90
  -7   1   5  130.79   13.80
  -7   1   5  116.09    4.00
  -7  -1  -5  128.29    3.90
   5   7  -1  134.19   11.90
   7  -1   5  115.29    3.70
   7   1  -5  126.89   12.90
   7   1  -5  124.29    3.80
  -1   5   7  121.19    9.40
   5  -7   1  115.99    3.60
  -7  -1  -5  123.49    3.70
   1  -5   7  136.69   10.60
  -1   5   7  126.49    3.60
   1   5  -7  130.69    3.80
   1   5  -7  131.99   11.60
  -1  -5  -7  124.99    3.80
  -7  -1   5  123.09    4.00
   1  -5  -7  134.99   10.20
  -5   7  -1  131.79   13.90
  -5   7  -1  112.19    4.90
   5  -7  -1  124.59    3.90
   1  -5  -7  123.29    3.80
  -7  -1   5  143.19   14.20
  -7   1  -5  131.49    4.00
   1  -5  -7  123.59    3.90
  -5  -7   1  125.59    3.80
   7  -1  -5  124.39    3.80
  -1   5  -7  132.79   12.10
  -1   5  -7  130.99    3.90
   5  -7  -1  125.89    3.70
   7   1   5  130.39    3.90
  -1  -5   7  116.39   11.20
  -1   5  -7  125.09    3.80
   1   5   7  128.69    7.60
   1   5   7  124.69    3.70
   7  -1  -5  132.59   10.80
   7  -1  -5  124.89    3.80
   5  -7  -1  130.19    3.50
   2   5  -7   33.70    8.10
   2   5  -7   33.20    1.40
  -5   7   2   35.90    9.80
   2   5  -7   35.50    1.40
   5  -7   2   29.20    1.60
  -2   5   7   37.70    6.60
  -2   5   7   33.40    1.10
   5  -7   2   44.30    8.80
  -2  -5  -7   33.80    3.40
   5   7  -2   30.90    8.60
   7   2  -5   24.30    9.10
  -7  -2  -5   33.60    1.40
  -7  -2  -5   32.60    1.50
  -5  -7  -2   32.90    1.40
  -5  -7  -2   34.80    1.60
   7   2  -5   31.50    1.50
  -5  -7  -2   33.70    1.40
  -7   2   5   52.99   10.20
  -7   2   5   33.60    1.80
  -2  -5  -7   33.30    1.40
   7  -2   5   32.30    1.40
   7  -2   5   36.10    1.50
   7  -2  -5   17.10    8.50
   2   5   7   34.90    4.30
   2   5   7   33.40    1.30
  -2   5  -7   32.30    1.50
  -2   5  -7   34.30    1.50
  -7   2  -5   34.70    1.80
  -2   5  -7   32.60    1.40
   2  -5  -7   31.30    8.00
   2  -5  -7   32.50    1.40
   5  -7  -2   43.60    8.50
   7  -2  -5   32.50    1.40
   7  -2  -5   34.50    1.50
  -5   7  -2   25.20    3.00
  -7  -2   5   34.10    1.70
  -7  -2   5   32.10    1.40
  -7   2  -5   30.80    3.00
  -5   7  -2   37.20    9.70
   7   2   5   31.60    4.20
   5  -7  -2   34.20    1.30
  -2   5  -7   33.70    1.70
   5  -7  -2   31.80    1.60
   2  -5  -7   33.60    1.40
   7   2   5   34.10    1.50
   2  -5  -7   33.90    1.60
   3   5  -7   36.10    8.70
  -3  -5  -7   27.70    1.30
   3   5  -7   26.70    1.20
   7  -3   5   28.00    1.30
   3   5  -7   26.20    1.20
   7   3  -5   43.40    7.60
   7   3  -5   30.20    7.80
  -7   3   5   26.50    1.70
  -3  -5  -7   26.30    1.50
  -7  -3  -5   28.40    1.30
  -3  -5  -7   26.10    1.30
  -7  -3  -5   27.60    1.40
   5   7  -3   16.90    9.40
   3   5  -7   27.30    2.80
  -7  -3  -5   26.20    1.30
   5  -7   3   24.00    1.40
   7   3  -5   26.90    1.40
  -7   3   5   26.30    1.00
  -5  -7  -3   26.50    1.30
  -5  -7  -3   27.90    1.40
  -5  -7  -3   27.60    1.30
   7  -3   5   25.70    1.30
   5  -7   3   27.80    8.90
  -5  -7  -3   27.00    1.40
   3  -5  -7   29.20    1.50
   5  -7  -3   26.80    1.50
  -5   7  -3   23.10    9.10
  -7   3  -5   31.10    1.90
  -7  -3   5   24.80    1.60
   7  -3  -5   16.40    9.10
   7  -3  -5   28.90    1.20
   7  -3  -5   30.60    1.50
   3  -5  -7   24.50    1.60
   3   5   7   27.30    1.20
   3  -5  -7   24.20    1.20
   3  -5  -7   27.30    1.30
  -3   5  -7   28.40    1.40
   7   3   5   27.30    4.20
  -7  -3   5   26.30    1.30
  -3   5  -7   27.90    1.20
  -7   3  -5   30.40    2.70
  -5   7  -3   24.30    2.50
   5  -7  -3   30.60    1.20
  -5  -7  -4  124.69    3.90
  -5  -7  -4  129.19    3.90
  -7   4   5  126.39    3.50
   4   5  -7  116.99   13.60
   7   4  -5  140.29   15.50
  -5  -7  -4  129.19    3.80
  -4  -5  -7  130.89    3.90
  -4  -5  -7  125.89    3.80
   4   5  -7  127.99    5.00
  -7   4   5  125.69    4.20
  -7  -4  -5  125.99    3.90
  -7  -4  -5  133.49    3.90
  -7  -4  -5  127.29    3.90
  -7  -4  -5  124.09    3.80
  -5  -7  -4  123.59    3.80
   7   4  -5  143.19   12.00
  -4  -5  -7  125.19    3.90
   4   5  -7  123.09    3.80
   5  -7   4  109.79   13.10
   5  -7   4  125.49    3.90
   4   5  -7  125.49    3.70
   7  -4   5  123.29    3.80
   7  -4   5  137.19    3.90
  -5   7  -4  115.79    4.40
   7  -4  -5  129.69    3.90
  -4   5  -7  125.89    3.90
   7   4   5  129.29    7.80
   4  -5  -7  123.89    4.00
   4  -5  -7  127.09    3.80
  -5   7  -4  127.49   14.30
  -5   7  -4  108.99    5.20
   4  -5  -7  129.19    4.00
   7  -4  -5  128.59    3.80
  -7   4  -5  118.19    5.10
  -7   4  -5  133.49    4.50
   5  -7  -4  119.09    4.00
  -7  -4   5  126.89    4.00
   5  -7  -4  132.19    3.80
   5  -7  -4  131.79    4.00
  -4   5  -7  121.79    3.60
   4  -5  -7  122.79    3.80
  -7  -4   5  124.09    3.80
  -7  -5  -5  859.71   23.00
  -7  -5  -5  813.22   23.00
   5   5  -7  845.42   23.80
   5   5  -7  861.01   22.90
   5   7  -5  861.81   33.70
   7   5  -5  861.81   22.80
  -7   5   5  829.72   23.20
   5   5  -7  873.71   22.90
   5   5  -7  844.42   31.40
  -7  -5  -5  820.62   22.90
  -5  -5  -7  820.22   23.00
  -5  -7  -5  870.31   22.90
  -5  -7  -5  823.42   23.00
  -5  -5  -7  848.02   23.00
  -5  -5  -7  832.52   22.90
  -7  -5  -5  867.11   23.00
  -5  -7  -5  854.81   23.00
   5  -7   5  806.12   22.90
  -5   5   7  773.42   23.10
   7   5  -5  869.91   22.80
   7   5  -5  802.92   32.60
   7  -5   5  905.41   23.00
   7  -5   5  818.92   22.90
  -5  -7  -5  832.42   23.00
   5  -7  -5  851.31   23.10
   7   5   5  869.51   26.20
  -7   5  -5  778.42   23.00
   7  -5  -5  871.51   23.10
   7  -5  -5  814.42   23.10
   5  -5  -7  849.91   22.90
   5  -5  -7  798.72   23.10
  -7   5  -5  735.43   23.90
  -5  -5   7  850.11   22.90
  -5   5  -7  813.82   23.00
   5  -5  -7  847.42   22.90
  -5   7  -5  837.92   23.40
  -5   7  -5  839.02   23.10
  -7   5  -5  856.81   23.50
   5  -7  -5  832.32   23.10
  -7  -5   5  857.71   22.90
   5  -5  -7  864.31   23.00
   5  -7  -5  850.61   22.90
  -5  -7  -6  440.56   11.90
  -5  -7  -6  428.86   11.90
   6   5  -7  439.16   11.70
   5   7  -6  436.06   11.80
  -6   5   7  418.86   12.10
  -7  -6  -5  410.16   12.00
  -7  -6  -5  438.96   11.90
  -6  -5  -7  438.16   11.80
  -5  -7  -6  436.76   11.80
  -7   6   5  430.26   12.20
   6   5  -7  428.86   22.80
   6   5  -7  401.26   12.80
   6   5  -7  413.76   11.80
   6   5  -7  442.56   11.80
   5   7  -6  402.46   12.70
  -5  -7  -6  419.66   11.90
   7   6  -5  436.16   11.70
   5   7  -6  441.56   11.80
   7   6  -5  433.96   11.70
  -7  -6  -5  449.76   11.90
   7  -6   5  380.36   12.10
  -5   7   6  419.86   12.20
  -6  -5  -7  440.26   11.90
   7  -6   5  424.36   11.80
  -7  -6  -5  406.36   11.80
  -6  -5  -7  418.56   11.90
   7  -6  -5  425.16   11.80
   7  -6  -5  415.86   12.00
  -5   7  -6  409.26   12.40
  -5   7  -6  430.56   12.00
  -6  -5   7  423.96   11.80
   5  -7  -6  423.06   11.80
  -6   5  -7  411.36   12.50
   5  -7  -6  448.06   12.00
   5  -7  -6  415.76   12.00
  -6   5  -7  418.56   11.90
  -7  -6   5  436.26   11.80
  -7   6  -5  372.96   12.90
  -7   6  -5  420.66   11.90
  -6   5  -7  429.86   12.80
   6  -5  -7  429.36   11.80
   7  -6  -5  439.36   12.00
  -7   6  -5  409.56   12.30
   7  -6  -5  444.26   11.80
   6  -5  -7  413.46   12.00
   6  -5  -7  432.26   11.80
   5  -7  -6  434.46   11.80
   0  -6  -7  145.49    4.50
   0   6  -7  140.99    4.50
   0   6  -7  153.88    4.50
   0   6   7  148.79   10.10
   6  -7   0  152.18   14.30
   6  -7   0  154.48    4.20
   6  -7   0  141.39    4.20
  -6  -7   0  154.78    4.40
  -7   0  -6  146.69    4.30
  -7   0  -6  151.48    4.60
   7   0   6  137.49    4.70
   0  -6  -7  139.39    4.30
  -6   7   0  149.19   16.30
  -7   0   6  146.49    4.60
   0  -6  -7  145.79   10.60
   0   6  -7  148.09    5.40
   0  -6  -7  156.08    4.40
   0  -6  -7  147.59    4.60
  -6   7   0  146.49    5.50
   0   6  -7  148.89    4.40
   0   6  -7  149.49   12.80
   6  -7   0  143.79    4.50
   7   0  -6  150.98    4.40
   7   0  -6  151.98    4.40
   0  -6   7  140.79   12.30
   6  -7   1  337.37   18.50
   6  -7   1  363.96    9.60
   7  -1   6  330.87   10.30
  -7  -1  -6  352.86    9.60
   7   1  -6  334.57    9.70
  -1  -6  -7  341.17   13.50
  -1  -6  -7  331.97    9.60
  -1  -6  -7  369.46    9.70
   7   1  -6  378.96   27.80
   6   7  -1  322.17   18.10
   7   1  -6  349.47    9.70
  -7  -1  -6  356.36    9.80
   6  -7   1  354.26    9.70
  -6   7   1  323.07    9.80
  -6   7   1  343.87   17.90
  -6   7   1  347.17   10.40
   1   6  -7  359.36    9.70
   1   6  -7  322.87   17.70
   1   6  -7  340.17   10.50
   1   6  -7  351.86    9.80
   1   6  -7  342.87    9.70
  -7   1   6  344.07    9.90
  -6  -7  -1  360.86    9.70
  -6  -7  -1  321.87    9.60
   7  -1   6  325.77    9.60
  -1  -6  -7  336.77    9.80
   1  -6  -7  342.07    9.60
   7  -1  -6  359.66    9.70
   6  -7  -1  366.96    9.40
   6  -7  -1  341.27    9.50
   1  -6  -7  334.87    9.80
  -1  -6   7  293.27   16.70
   7  -1  -6  350.96    9.70
   1   6   7  340.47   13.60
   6  -7  -1  341.57   18.90
   6  -7  -1  353.86    9.80
  -6   7  -1  336.07   10.60
   1  -6  -7  351.26    9.70
  -6   7  -1  368.56   20.20
  -1   6  -7  326.27   10.40
  -1   6  -7  344.47    9.70
  -7  -1   6  336.67    9.80
  -7   1  -6  350.06    9.90
  -6  -7   1  361.16    9.70
   1  -6  -7  357.16    9.80
   7   2  -6  979.70   27.20
   6  -7   2 1035.00   27.20
   6   7  -2  964.20   35.20
  -6   7   2  965.90   27.70
   7   2  -6 1002.80   34.80
  -7  -2  -6 1028.30   27.10
   2   6  -7  914.31   27.80
   2   6  -7  998.80   27.20
  -6  -7  -2 1047.90   27.30
  -6  -7  -2 1048.00   27.20
  -2  -6  -7  929.51   27.10
   7  -2   6  950.10   27.10
   6  -7   2  920.31   34.60
   6  -7   2 1065.49   27.10
   2   6  -7  981.80   34.30
  -7  -2  -6 1046.70   27.20
  -6   7   2  892.11   40.60
  -2  -6  -7 1032.20   27.20
  -7   2   6 1024.60   27.40
  -2  -6  -7  987.40   27.20
  -6  -7  -2  965.60   27.30
  -6  -7  -2  975.10   27.20
  -2  -6  -7  945.31   27.10
   2   6  -7 1035.60   27.20
  -7  -2   6 1038.50   27.40
  -6  -7   2 1060.89   27.20
   7  -2  -6  961.40   27.20
   7   2   6  973.60   28.10
   7   2   6 1083.39   27.40
  -7  -2   6  939.31   27.10
  -6   7  -2  983.00   36.00
  -7   2  -6 1062.09   27.50
  -2  -6   7  931.31   34.00
  -2   6  -7  969.80   27.70
  -2   6  -7  994.50   27.20
   2  -6  -7  959.40   27.10
   2  -6  -7 1038.80   27.20
   2  -6  -7 1033.90   27.30
   2  -6  -7  991.60   27.30
  -6   7  -2  947.21   28.00
   7  -2  -6 1011.50   27.20
   6  -7  -2 1014.90   35.40
   6  -7  -2 1016.10   27.10
   6  -7  -2 1038.80   27.30
   2   6   7  988.80   29.40
  -6  -7  -3  331.87    9.00
  -3  -6  -7  312.07    8.90
  -7  -3  -6  330.27    8.90
   3   6  -7  316.27    8.90
   3   6  -7  318.17   18.50
   3   6  -7  303.77    9.70
  -3  -6  -7  312.87    8.80
  -6  -7  -3  315.67    8.90
   7  -3   6  326.87    9.00
  -7   3   6  320.67    9.10
   7   3  -6  341.07   19.00
  -6  -7  -3  309.17    8.90
  -6   7   3  318.37    9.50
  -3  -6  -7  284.97    8.80
  -3  -6  -7  333.67    8.90
   7  -3   6  344.77    9.00
   6   7  -3  300.47   19.50
   6  -7   3  292.27   18.20
   6  -7   3  314.87    8.90
   7   3  -6  311.77    8.90
  -7  -3  -6  327.17    8.90
  -6  -7  -3  324.67    8.90
   3   6  -7  320.67    8.90
  -7  -3  -6  300.47    8.90
   7   3   6  301.87    9.70
   7   3   6  323.87    9.00
  -3   6  -7  315.77    9.00
  -7   3  -6  319.37    9.30
   7  -3  -6  322.57    8.90
  -6   7  -3  291.57    9.20
   6  -7  -3  329.57    8.80
  -7   3  -6  267.37    9.90
  -6   7  -3  288.57    9.90
   3  -6  -7  324.17    8.90
  -3   6  -7  300.97    9.60
   6  -7  -3  323.07    9.00
   3   6   7  312.07   10.60
   7  -3  -6  333.17    9.00
  -6   7  -3  318.47   19.50
  -7  -3   6  316.57    8.80
   6  -7  -3  289.97    9.00
  -6  -7   3  329.97    8.90
  -7  -3   6  324.77    9.10
   3  -6  -7  300.77    9.00
   3  -6  -7  331.97    9.00
   3  -6  -7  311.17    8.80
  -3   6  -7  307.17    8.70
  -7  -4  -6  749.82   20.10
   7   4  -6  701.63   29.20
   7   4  -6  750.42   20.10
   7  -4   6  708.73   20.00
   7  -4   6  765.82   20.20
   6   7  -4  735.73   30.40
  -6   7   4  713.33   20.50
  -4  -6  -7  722.63   20.00
   6  -7   4  693.73   20.00
  -6  -7  -4  786.02   20.20
  -6  -7  -4  752.52   20.10
  -6  -7  -4  732.53   20.10
   4   6  -7  684.33   28.80
   4   6  -7  698.23   20.80
   4   6  -7  780.22   20.10
   4   6  -7  769.72   20.00
  -7   4   6  747.03   20.30
  -4  -6  -7  758.22   20.10
  -4  -6  -7  728.33   20.00
  -4  -6  -7  724.83   20.10
  -7  -4  -6  766.52   20.10
  -7  -4  -6  717.83   19.90
  -7  -4  -6  729.83   20.10
  -7  -4  -6  717.33   19.90
  -6  -7  -4  703.33   20.10
  -4   6  -7  720.13   20.10
  -4   6  -7  734.43   20.70
   7  -4  -6  737.13   20.00
  -6  -7   4  752.92   20.10
  -6   7  -4  642.44   21.00
  -6   7  -4  710.13   20.40
   6  -7  -4  765.42   20.00
   4  -6  -7  696.43   20.20
   6  -7  -4  725.93   20.20
   4  -6  -7  778.82   20.10
   4  -6  -7  771.12   20.20
  -7   4  -6  775.52   20.60
   7   4   6  739.63   21.60
  -4   6  -7  696.63   19.90
   4  -6  -7  729.63   20.00
  -7  -4   6  765.42   20.30
  -7  -4   6  725.13   20.00
  -7   4  -6  632.74   21.00
  -7   4  -6  687.43   20.10
   7  -4  -6  756.42   20.20
   7   5  -6   14.20    0.80
   7   5  -6   13.20    0.80
   7   5  -6   15.60    2.30
   7  -5   6   11.90    1.10
   7  -5   6   12.10    1.30
  -7  -5  -6   12.60    0.80
  -7  -5  -6   11.10    1.20
  -7  -5  -6   14.00    1.20
  -7  -5  -6   14.10    1.10
  -7  -5  -6   13.60    1.10
  -7  -5  -6   13.10    0.80
   6  -7   5   15.40    1.30
   6   7  -5   13.10    2.20
   5   6  -7   16.40    2.00
   5   6  -7   13.60    1.00
  -7   5   6   14.20    1.40
  -6  -7  -5   15.00    1.10
  -6  -7  -5   13.00    1.20
  -6  -7  -5   13.40    1.10
  -6  -7  -5   12.30    1.10
  -5  -6  -7   12.40    1.20
   5   6  -7   13.20    0.90
   5   6  -7   21.90   11.00
  -6   7   5   13.90    1.60
  -5  -6  -7   14.10    1.10
  -5  -6  -7   10.80    1.10
  -5   6   7   13.80    1.30
  -5   6  -7   11.70    1.70
  -5   6  -7   10.70    1.00
  -6  -7   5   12.50    1.10
   5  -6  -7   11.40    1.00
   5  -6  -7   15.10    1.10
   5  -6  -7   14.50    1.20
  -6   7  -5   14.60    1.70
  -6   7  -5   15.20    1.20
  -7   5  -6   11.90    1.00
  -7   5  -6   12.70    1.60
   6  -7  -5   13.70    1.00
   6  -7  -5   13.90    1.40
   6  -7  -5   14.90    1.20
  -7  -5   6   12.40    1.00
  -7   5  -6   12.60    2.30
   7  -5  -6   11.70    1.10
   7  -5  -6   13.40    1.00
   7  -5  -6   14.00    1.20
   7  -5  -6   13.70    1.40
  -7  -6  -6    9.50    1.00
  -7  -6  -6    5.60    0.80
  -7  -6  -6    9.90    0.90
  -7  -6  -6    9.70    0.90
   7  -6   6    8.90    1.10
   7  -6   6   10.80    1.00
   7   6  -6    8.50    0.80
   7   6  -6   10.50    2.20
  -7   6   6    7.20    1.20
  -6  -7  -6    9.40    0.90
  -6  -7  -6    8.20    0.90
  -6  -7  -6    9.70    0.80
  -6  -7  -6    7.80    0.80
   6   7  -6    9.10    0.90
  -6  -6  -7    7.70    0.80
  -6  -6  -7   10.70    1.10
  -6  -6  -7    7.50    0.80
   7   6  -6    9.10    0.90
   6   6  -7    8.00    0.90
  -6   7   6    8.90    1.40
  -6   6   7    6.10    1.10
   6   7  -6    8.50    0.90
   6   6  -7    9.30    2.00
   6   6  -7    8.20    0.80
   6   7  -6    8.30    2.00
   6  -7  -6    7.40    0.70
  -6   6  -7    8.00    0.90
   6  -7  -6    8.90    1.00
   6  -6  -7    7.30    0.70
   6  -6  -7    9.70    0.80
   6  -6  -7    7.80    0.90
   6  -6  -7    9.60    1.00
   6  -7  -6    9.80    1.10
  -6   7  -6    8.20    1.00
  -6   6  -7   10.90    1.80
  -6  -7   6    7.60    0.80
   6  -7  -6    6.20    0.70
  -6   7  -6   11.00    1.70
   7  -6  -6    8.50    0.80
   7  -6  -6    9.40    0.80
   7  -6  -6    9.40    1.00
   7  -6  -6    8.00    1.00
  -7  -6   6    9.60    1.00
  -7   6  -6   10.40    1.70
  -7   6  -6    9.70    1.10
  -7   6  -6    6.20    1.50
  -6  -6   7    9.40    1.00
  -7  -7   0    0.70    0.60
  -7  -7   0   -0.10    0.50
  -7   0  -7   -0.50    0.60
  -7   0  -7    0.00    0.70
  -7   0   7   -0.20    0.70
  -7   7   0   10.00    9.30
  -7   7   0   -0.90    1.50
  -7   7   0    1.10    0.90
   0  -7  -7    1.00    0.60
   0  -7  -7   -0.20    0.60
   0  -7  -7    0.10    0.70
   0  -7  -7    0.90    0.80
   0   7  -7   -0.10    1.50
   0   7  -7   -0.40    0.70
   7  -7   0   -7.20   10.30
   7  -7   0   -0.30    0.40
   7  -7   0    0.30    0.60
   7  -7   0   -0.90    0.70
   7   0  -7   -0.20    0.50
   7   0  -7    0.00    0.60
   7   0   7    0.10    0.60
  -7  -7  -1  497.25   14.30
  -7  -7  -1  511.35   14.20
  -7  -7  -1  504.65   14.10
   7  -7   1  534.95   14.10
   7  -7   1  523.55   14.20
  -7  -1  -7  514.85   14.10
  -7  -1  -7  527.75   14.30
   7  -1   7  520.55   14.30
   7  -1   7  478.85   14.10
  -7   1   7  524.65   14.40
   7   1  -7  511.25   14.20
   1   7  -7  495.25   14.20
   7  -7   1  438.36   23.50
  -7   7   1  507.25   25.80
  -7   7   1  492.65   14.90
  -7   7   1  499.05   14.30
  -1  -7  -7  513.05   14.10
  -1  -7  -7  532.85   14.20
  -1  -7  -7  495.55   14.10
  -1  -7  -7  501.95   14.30
   1   7  -7  490.35   14.90
   7   1  -7  539.05   14.30
  -1   7  -7  514.55   14.30
   1  -7  -7  527.55   14.20
   1  -7  -7  539.85   14.40
   1  -7  -7  492.65   14.30
  -7   7  -1  490.65   14.50
  -7   7  -1  516.45   15.10
   7  -7  -1  532.05   24.40
   7  -7  -1  498.65   14.00
   7  -7  -1  537.25   14.30
  -1   7  -7  511.35   15.20
  -7  -7   1  514.55   14.20
  -7  -7   1  504.45   14.10
   7  -1  -7  519.75   14.20
   7  -1  -7  519.45   14.20
  -7  -1   7  525.05   14.40
  -7   1  -7  515.75   14.40
   1  -7  -7  523.35   14.10
  -7   7  -1  524.85   25.60
   7   1   7  512.75   14.30
  -7  -7  -2   66.09    2.40
  -7  -7  -2   67.19    2.30
  -7  -7  -2   61.19    2.30
   7  -7   2   64.99    2.40
   2   7  -7   62.89    3.50
  -7  -2  -7   67.79    2.10
  -7  -2  -7   67.09    2.20
  -7  -2  -7   65.09    2.40
  -7  -2  -7   62.79    2.30
  -7  -2  -7   69.49    2.20
   7   2  -7   65.09    2.30
   2   7  -7   63.09    2.40
  -7   2   7   65.49    2.60
   7  -2   7   66.79    2.40
   7   2  -7   55.59    9.70
  -7   7   2   65.69    3.20
  -2  -7  -7   62.89    2.20
  -2  -7  -7   67.09    2.40
  -2  -7  -7   65.59    2.20
  -2  -7  -7   66.69    2.40
   7  -7   2   67.79    2.20
   7  -7   2   61.79   18.70
  -7  -2   7   65.99    2.50
   2  -7  -7   67.79    2.30
   2  -7  -7   67.39    2.50
   2  -7  -7   63.79    2.50
  -7  -7   2   62.59    2.20
  -7   2  -7   68.19    2.80
   7  -7  -2   64.49    2.20
   7  -7  -2   61.29    2.80
   2  -7  -7   63.09    2.20
  -2   7  -7   65.09    3.40
  -7  -7   2   66.99    2.30
   7  -2  -7   69.59    2.30
   7  -2  -7   69.59    2.40
  -7   7  -2   63.89    3.70
  -7   7  -2   61.39    2.80
  -2   7  -7   63.99    2.50
   7   2   7   67.39    2.40
  -7  -7  -3   84.99    2.90
  -7  -7  -3   92.39    3.00
  -7  -7  -3   89.89    2.90
  -7  -7  -3   82.19    2.80
   7   3  -7   81.49   13.00
   7   3  -7   87.29    2.90
  -3  -7  -7   87.59    2.80
  -7  -3  -7   86.19    2.70
  -7  -3  -7   87.59    2.80
  -7  -3  -7   89.09    2.90
  -7  -3  -7   83.99    2.80
  -7  -3  -7   85.79    2.70
   7  -3   7   88.99    3.00
  -3  -7  -7   87.59    2.90
   3   7  -7   90.49    2.80
   7  -7   3   90.49    2.80
  -7   3   7   86.99    3.10
   3   7  -7   90.09    2.90
   3   7  -7   84.79    3.00
  -7   7   3   86.49    3.70
  -3  -7  -7   83.69    2.70
   3   7  -7   90.09    4.10
   7  -7   3   85.39    2.90
  -3  -7  -7   86.59    2.90
  -7   7  -3   83.39    3.40
  -7  -3   7   83.09    2.80
   3  -7  -7   86.79    2.80
   3  -7  -7   90.79    2.90
   3  -7  -7   86.49    3.00
   3  -7  -7   85.09    3.10
  -7   3  -7   78.09    2.90
  -3   7  -7   82.99    3.00
  -3   7  -7   82.89    3.80
  -7   7  -3   87.09    4.40
   7  -7  -3   86.29    2.70
   7  -7  -3   85.19    3.00
   7  -7  -3   89.39    3.10
  -7   3  -7   93.19    3.50
  -7  -7   3   83.29    2.80
   7  -3  -7   87.59    2.80
   7  -3  -7   89.09    2.90
  -7  -3   7   83.79    3.10
  -7  -7   3   83.79    3.00
  -7  -7   3   89.79    2.90
   7   3   7   88.29    3.00
  -7  -7  -4   59.49    2.30
  -7  -7  -4   63.29    2.30
  -7  -7  -4   53.19    2.40
  -7  -7  -4   60.29    2.20
   7  -4   7   62.59    2.30
   7   4  -7   51.99   13.10
  -7  -4  -7   60.59    1.90
  -7  -4  -7   63.89    2.20
  -7  -4  -7   61.59    2.20
  -7  -4  -7   57.79    2.20
  -7  -4  -7   59.49    2.00
  -4  -7  -7   61.69    2.30
  -4  -7  -7   62.99    2.20
   4   7  -7   60.49    2.10
  -7   4   7   63.39    2.60
   7   4  -7   62.59    2.20
   7   7  -4   56.39   11.60
  -7   7   4   64.39    3.00
  -4  -7  -7   56.09    2.10
   7  -7   4   60.89    2.30
   7  -7   4   62.49    2.20
  -4  -7  -7   60.09    2.30
   4   7  -7   62.29    3.50
   4   7  -7   58.09    2.40
   4   7  -7   59.69    2.10
  -7  -4   7   59.79    2.10
  -7   4  -7   61.89    2.30
   4  -7  -7   61.29    2.40
   4  -7  -7   60.09    2.40
  -7   4  -7   66.39    3.00
  -4   7  -7   65.39    3.30
  -4   7  -7   61.19    2.30
   4  -7  -7   61.09    2.20
   4   7   7   48.40    6.60
   7  -7  -4   63.59    2.40
   7  -7  -4   61.59    2.40
  -4   7  -7   57.09    2.10
   4  -7  -7   59.79    2.10
   7  -4  -7   60.59    2.10
   7  -4  -7   61.09    2.20
   7  -4  -7   58.19    2.40
   7  -4  -7   60.89    2.50
  -7  -7   4   64.89    2.20
  -7  -7   4   61.29    2.20
  -7   7  -4   60.49    3.80
  -7   7  -4   60.19    2.90
  -7  -7  -5  193.48    6.10
  -7  -7  -5  213.28    6.10
  -7  -7  -5  175.58    6.10
  -7  -7  -5  208.28    6.00
   5   7  -7  202.78    5.90
  -5  -7  -7  209.98    6.00
  -7  -5  -7  206.68    5.70
  -7  -5  -7  202.78    6.00
  -7  -5  -7  209.08    6.00
  -7  -5  -7  201.48    6.00
  -7  -5  -7  205.68    5.80
   7   7  -5  212.68    7.20
   7  -7   5  199.38    6.00
  -5   7   7  199.88    6.40
   5   7  -7  204.78    5.90
  -7   5   7  208.58    6.30
   7   5  -7  208.08    5.80
   7   5  -7  211.98    7.30
  -7   7   5  192.28    6.50
  -5  -7  -7  194.98    5.90
  -5  -7  -7  206.58    6.10
   5   7  -7  214.38    6.20
  -5  -7  -7  209.18    6.10
   5   7  -7  198.28    7.10
   7   5  -7  201.38    6.00
   7  -5   7  216.68    6.10
   7   5  -7  205.28    5.90
   7  -7   5  206.58    6.00
  -7   5  -7  206.08    6.10
   5  -7  -7  209.18    6.20
  -7   5  -7  212.88    6.80
  -7   5  -7  192.08    6.70
  -7  -7   5  195.58    5.90
  -7  -7   5  207.68    6.00
   7  -7  -5  206.08    5.90
  -5   7  -7  205.88    6.10
   7  -7  -5  209.58    6.20
   7  -7  -5  207.08    6.20
   5  -7  -7  208.78    6.00
  -5   7  -7  205.68    6.80
   7  -5  -7  198.28    5.90
   7  -5  -7  213.28    6.00
   7  -5  -7  209.68    6.10
   7  -5  -7  209.68    6.20
   5  -7  -7  228.68    6.50
  -7   7  -5  169.48    7.30
  -7   7  -5  205.88    6.60
   7  -7  -5  213.18    5.90
   5  -7  -7  199.08    5.90
  -7  -5   7  205.58    5.90
  -7  -7  -6  214.88    6.80
  -7  -7  -6  233.48    6.80
  -7  -7  -6  233.78    6.70
  -7  -7  -6  232.08    6.70
   7   6  -7  231.88    6.60
  -7  -6  -7  225.68    6.40
  -7  -6  -7  234.48    6.80
  -7  -6  -7  227.18    6.70
  -7  -6  -7  225.58    6.40
   7   7  -6  230.78    6.60
   7   6  -7  231.88    6.60
  -6   7   7  230.28    7.10
  -7   6   7  229.38    7.10
   7  -7   6  236.88    6.80
   7   6  -7  236.68    7.90
  -7   7   6  226.18    7.20
  -6  -7  -7  214.48    6.50
  -6  -7  -7  241.98    6.80
  -6  -7  -7  235.28    6.70
  -6  -7  -7  233.88    6.80
   7  -7   6  232.08    6.70
   6   7  -7  239.08    7.90
   7   7  -6  227.48    6.60
   6   7  -7  235.68    6.60
   7   7  -6  229.38    7.90
   7  -6   7  226.28    6.80
   6   7  -7  233.78    6.60
   6  -7  -7  230.38    6.90
  -7   6  -7  229.68    6.80
  -6   7  -7  224.98    7.50
   6  -7  -7  235.38    6.90
   7  -7  -6  229.08    6.60
   7  -7  -6  231.78    6.70
  -7   6  -7  222.48    7.50
   7  -7  -6  233.68    6.90
  -7   7  -6  234.18    7.40
  -6  -7   7  235.28    6.70
   7  -6  -7  227.38    6.60
   7  -6  -7  241.88    6.70
   7  -6  -7  234.98    6.90
   7  -6  -7  236.48    6.90
   6  -7  -7  236.08    6.70
  -7  -7   6  231.78    6.70
  -7   7  -6  227.68    6.80
  -6   7  -7  234.18    6.90
   7  -7  -6  225.98    6.90
   6  -7  -7  235.18    6.60
  -7  -6   7  227.78    6.60
  -7  -7  -7    6.50    0.80
  -7  -7  -7    8.80    1.00
  -7  -7  -7    6.20    0.80
  -7  -7  -7    4.70    0.80
   7   7  -7    6.60    0.70
   7   7  -7   10.00    2.10
  -7   7   7    8.70    1.40
   7  -7   7    6.60    0.90
   7   7  -7    6.90    0.70
   7  -7  -7    5.30    0.90
   7  -7  -7    7.80    1.10
   7  -7  -7    5.40    0.70
  -7   7  -7    4.10    1.60
  -7   7  -7    7.10    1.00
   7  -7  -7    7.20    0.80
  -8   0   0   51.19    8.00
  -8   0   0   51.59    1.80
  -8   0   0   49.40    1.90
   0  -8   0   58.09    7.70
   0  -8   0   49.90    1.80
   0  -8   0   50.89    2.00
   0   0  -8   49.30    6.20
   0   0  -8   51.29    5.90
   0   0  -8   48.10    1.70
   0   8   0   62.99    8.60
   8   0   0   50.09    7.50
   8   0   0   48.70    1.80
   0   8  -1   16.00    6.20
   0   8   1   32.50    7.40
   1   0  -8   20.60    4.90
   1   0  -8   17.30    5.90
   1   0  -8   20.10    1.10
   8  -1   0   18.50    6.60
   8  -1   0   19.10    1.10
   8   1   0    8.60    6.50
   0  -8  -1   19.60    6.20
   0  -8  -1   19.70    1.10
   0  -8  -1   22.20    1.30
   0  -8   1   18.10    5.60
   0  -8   1   19.90    1.20
  -8   1   0   18.90    1.30
  -1   0  -8   18.30    3.80
  -1   0  -8   19.40    1.00
  -8  -1   0   17.40    7.40
  -8  -1   0   19.70    1.00
  -8  -1   0   19.80    1.10
  -8   1   0   10.60    7.30
  -8   1   0   19.20    1.00
   8  -2   0 1248.68   40.50
   8  -2   0 1334.97   34.80
   8   2   0 1318.27   40.50
   0   8  -2 1256.27   41.20
   0   8   2 1333.07   40.60
   2   0  -8 1265.07   38.60
   2   0  -8 1285.37   39.40
   2   0  -8 1330.47   34.80
  -8   2   0 1362.86   34.90
  -2   0  -8 1274.57   36.10
  -2   0  -8 1285.37   36.30
  -2   0  -8 1295.17   34.70
   0  -8  -2 1218.88   39.70
   0  -8  -2 1307.77   34.80
   0  -8  -2 1310.97   34.90
   0  -8   2 1210.58   40.40
  -8   2   0 1315.57   34.70
  -8   2   0 1165.88   40.70
  -8   2   0 1220.78   35.10
  -8  -2   0 1270.97   34.80
  -8  -2   0 1255.07   34.80
  -8  -2   0 1283.67   40.40
   0  -8  -3  135.69    3.90
  -3   0  -8  135.79    4.00
  -3   0  -8  138.09    4.00
  -3   0  -8  131.89    5.20
  -3   0  -8  142.89    5.50
  -3   0  -8  137.39    4.00
   3   0  -8  135.99    4.10
   3   0   8  142.89    4.10
   8  -3   0  138.89   12.20
   8  -3   0  128.99    4.10
   8   3   0  129.09   11.50
  -8   3   0  128.09   13.30
   0  -8  -3  124.09    4.20
   0  -8   3  126.09   12.10
   0   8  -3  139.49   13.60
   0   8   3  170.58   11.50
  -8  -3   0  137.79    4.10
  -8  -3   0  138.49    4.10
   8   3   0  128.59   10.70
  -8   3   0  138.29    4.70
  -8   3   0  134.89    4.30
   3   0  -8  142.49   12.20
   3   0  -8  133.69    9.90
   0  -8   4  523.05   22.00
   0   8  -4  518.15   23.20
  -4   0  -8  540.35   15.00
   4   0  -8  521.25   14.80
   4   0   8  554.54   15.00
   8  -4   0  528.35   22.40
  -4   0  -8  535.35   14.80
  -8   4   0  543.65   15.40
  -8   4   0  552.04   15.20
   4   0  -8  538.05   14.90
   8   4   0  527.05   22.70
  -8  -4   0  536.95   14.90
  -8   4   0  555.44   23.50
   8  -4   0  556.54   14.90
  -4   0  -8  535.95   14.80
   0  -8  -4  541.65   15.10
   0  -8  -4  536.55   14.90
  -8  -4   0  541.15   15.00
  -4   0  -8  533.45   14.80
   0  -8  -4  545.95   14.70
   8  -5   0   35.40    1.60
  -5   0  -8   31.80    1.40
  -8  -5   0   30.40    1.40
   0   8  -5   28.80    2.60
   0   8  -5   35.90    1.80
   5   0  -8   34.20    1.50
   5   0  -8   35.10    1.60
  -8   5   0   32.20   11.20
  -5   0  -8   35.20    1.40
   0  -8  -5   34.60    1.70
   0  -8   5   43.60    9.30
   0   8  -5   46.10   10.90
  -8   5   0   36.40    2.60
  -8   5   0   32.00    2.30
  -5   0   8   29.60    1.70
   5   0   8   31.60    1.80
   8  -5   0   30.30    9.80
  -8  -5   0   32.30    1.60
  -8  -5   0   35.20    1.50
   0  -8  -5   32.10    1.40
   0  -8  -5   36.10    1.50
  -5   0  -8   33.00    1.40
  -5   0  -8   34.20    1.80
   6   0  -8 1256.17   35.10
   0  -8  -6 1283.67   35.20
  -8  -6   0 1365.66   35.20
  -8  -6   0 1268.07   35.10
  -8   6   0 1213.58   44.70
  -8   6   0 1253.27   35.80
  -8   6   0 1209.98   35.30
  -8   6   0 1302.37   35.70
   6   0   8 1359.86   35.30
   8  -6   0 1205.78   43.50
  -6   0   8 1363.26   35.30
   0  -8  -6 1245.58   35.10
   0  -8  -6 1361.46   35.40
  -6   0  -8 1319.57   35.10
  -6   0  -8 1356.26   35.30
   0  -8   6 1162.28   42.40
   0  -8  -6 1328.07   35.20
   0   8  -6 1282.87   35.20
   6   0  -8 1322.77   35.20
  -6   0  -8 1297.97   35.00
   0   8  -6 1250.17   35.70
  -8  -6   0 1283.57   35.30
   8  -6   0 1355.86   35.20
   0   8  -6 1260.77   43.60
  -6   0  -8 1330.97   35.10
   0  -8  -7  689.43   21.50
  -8  -7   0  778.12   20.90
   8  -7   0  696.83   31.30
  -8  -7   0  732.43   21.10
  -8  -7   0  769.62   21.00
  -8   7   0  780.22   21.80
  -8   7   0  768.02   21.20
  -7   0  -8  737.23   20.90
   7   0  -8  772.72   21.00
   7   0   8  809.72   21.20
   0   8  -7  740.73   21.00
   7   0  -8  803.52   21.00
  -7   0  -8  785.82   21.20
  -7   0  -8  756.12   20.80
   7   0   8  746.13   20.80
   8  -7   0  810.02   20.80
  -7   0   8  793.72   21.20
   0  -8  -7  767.52   20.90
   0  -8  -7  770.32   21.10
   0  -8  -7  801.72   21.00
  -8   7   0  715.23   33.50
   0   8  -7  738.33   21.70
   0  -8  -7  759.02   20.90
   0  -1  -8    0.00    0.50
   0  -1  -8   -7.70    4.10
   8   0   1    0.60    0.60
  -8   0   1   -4.60    7.10
   1  -8   0    0.00    0.60
  -8   0   1   -0.50    0.40
   0   1  -8   -5.50    4.90
  -1  -8   0   -1.50    4.60
  -1  -8   0   -1.10    0.50
  -1   8   0    4.00    5.70
   8   0  -1   -7.00    6.60
   8   0  -1   -0.90    0.50
   1  -8   0    1.90    6.40
   0   1  -8   -1.30    4.10
  -8   0   1   -0.50    0.50
   1  -8   0    0.00    0.50
  -8   0  -1   -0.40    6.40
  -8   0  -1   -0.50    0.40
  -8   0  -1   -0.40    0.50
   0  -1  -8   -1.30    3.60
   8   0   1   -3.30    5.80
   1   8   0   -2.40    7.10
   0   1  -8   -0.50    0.50
  -1  -1  -8    2.60    3.40
  -1  -8  -1    8.80    5.90
   8  -1   1    3.50    0.60
   8   1  -1   12.10    6.70
   8   1  -1    4.00    0.60
  -8   1   1    9.80    7.60
  -1  -1  -8    3.40    0.50
  -8   1   1    3.40    0.70
  -8   1   1    4.30    0.50
   1  -8   1    3.60    0.70
   1  -8   1   -2.60    6.50
  -1  -8  -1    3.10    0.60
  -1   8   1    5.50    7.20
  -1  -1  -8    0.60    2.70
  -8  -1  -1    4.00    0.60
   1   1  -8    1.20    5.10
   1   1  -8    3.20    0.50
  -8  -1  -1    0.90    6.40
  -8  -1  -1    4.10    0.60
   1   1  -8   -4.40    4.70
   1   8  -1    8.60    5.90
   8  -1   1   -1.80    6.40
   1  -8   1    2.80    0.70
  -8  -1   1    3.30    0.60
  -8  -1   1   16.80    7.60
   1  -1  -8    1.80    5.10
   1  -1  -8    3.80    0.60
   1  -8  -1    3.60    0.60
  -1  -8   1    1.10    6.30
   1  -8  -1    4.40    6.50
  -1   1  -8    4.20    4.60
   1  -8  -1    5.20    0.80
   8  -1  -1    5.10    6.70
   8   1   1   10.40    6.20
  -8   1  -1    4.80    0.70
  -1   1  -8    7.70    4.10
   1   8   1    0.70    6.30
   8  -1  -1    2.50    0.60
  -8  -1   1    3.30    0.50
  -8   1  -1    6.70    6.90
  -8   1  -1    5.60    0.70
  -1   8  -1    4.70    7.50
   1  -1  -8    1.30    4.30
  -1   1  -8    2.60    0.50
   1  -8   2  298.57   15.10
   2   1  -8  273.97   12.60
   2   1  -8  268.47   14.30
  -1  -8  -2  280.67    7.90
  -8  -2  -1  292.47   14.30
  -8   2   1  265.37    8.10
   8  -2   1  299.97   14.60
  -2  -1  -8  276.17    7.80
  -8  -2  -1  278.67    7.90
   1  -8   2  278.47    7.90
   8  -2   1  273.77    7.80
   1   8  -2  256.57   15.90
  -8   2   1  286.77    8.00
  -8   2   1  280.77    7.70
  -8   2   1  256.57   14.20
   2   1  -8  286.57    7.80
   8   2  -1  267.07   14.70
  -1   8   2  248.08   15.00
  -8  -2  -1  283.47    7.80
  -2  -1  -8  278.07    7.90
   8   2   1  279.17   14.70
   1   8   2  285.77   15.00
   2   1   8  285.57    7.80
   2  -1  -8  286.07    7.90
  -2   1  -8  275.57    7.70
  -8   2  -1  251.57   15.20
  -8   2  -1  275.27    8.30
  -8   2  -1  293.57    8.00
   8  -2  -1  269.27    7.70
   1  -8  -2  283.47    7.80
   1  -8  -2  283.37    8.00
  -2   1  -8  271.67    7.70
   8  -2  -1  271.17    7.80
  -8  -2   1  277.77    7.80
  -8  -2   1  253.57   15.20
  -1  -8   2  277.07   14.60
  -1   8  -2  271.17   16.40
   2  -1  -8  278.97   12.90
   1  -8  -2  257.17   14.30
   8  -2  -1  256.07   15.10
  -8  -2   1  270.67    7.80
  -2   1  -8  278.97   10.90
  -2   1  -8  283.27    7.80
   8  -3   1    0.80    0.40
  -8   3   1    6.00    8.40
   8  -3   1    0.40    0.50
  -1  -8  -3   -4.40    6.80
   8   3  -1    4.00    7.00
   8  -3   1   -3.40    6.80
  -8   3   1    0.80    1.10
  -8  -3  -1   -0.10    0.40
  -8  -3  -1    1.00    0.50
   8   3  -1    3.50    7.00
   3   1  -8   -3.50    6.40
   3   1  -8    3.00    6.50
  -1   8   3   -5.70    9.10
  -1  -8  -3    0.80    0.50
  -1  -8  -3    0.30    0.30
   3   1  -8    0.30    0.50
  -3  -1  -8    0.20    0.40
   1  -8   3    1.40    7.40
   1   8  -3   -4.10    8.30
  -8   3   1    1.10    0.80
  -3   1  -8    1.90    0.50
  -8   3  -1   -0.40    0.70
   1  -8  -3    0.80    0.50
  -3   1  -8    0.00    3.60
   8  -3  -1    0.50    0.50
   3   1   8    0.40    0.50
   8  -3  -1   -0.50    0.40
   1  -8  -3    0.30    0.60
  -8  -3   1    0.90    0.50
   1   8   3   -8.30    6.20
   1  -8  -3    1.10    0.30
  -3   1  -8    0.10    0.40
  -1  -8   3    3.00    7.20
  -1   8  -3    5.90    8.30
  -8  -3   1    1.60    0.50
   1  -8  -3    5.50    6.60
   8  -3  -1    4.50    6.00
   3  -1  -8   -0.40    0.60
   8   3   1   -1.90    5.60
  -8   3  -1  -18.60    7.60
  -8   3  -1    0.80    1.20
  -3   1  -8   -0.20    0.40
   3  -1  -8   -4.10    6.20
   3  -1  -8    0.40    0.50
   8   3   1    3.50    6.70
  -8  -4  -1  182.48    5.30
   1  -8   4  189.48   13.80
   1   8  -4  157.18   15.00
   8  -4   1  188.38    5.20
   4   1  -8  169.08    5.20
   4   1  -8  215.48   19.20
  -4  -1  -8  180.48    5.20
   8  -4   1  201.38   14.20
  -8  -4  -1  175.58    5.30
  -8  -4  -1  167.18    5.20
  -1  -8  -4  181.18    5.10
  -1  -8  -4  180.28    5.30
  -8   4   1  142.89   15.60
  -8   4   1  181.68    5.80
  -8   4   1  182.48    5.60
  -4  -1  -8  180.58    5.20
  -4  -1  -8  172.68    5.30
   8   4  -1  187.68   14.20
   8  -4   1  184.78    5.30
   4  -1   8  185.08    5.30
  -4  -1  -8  185.28    5.20
  -4   1   8  173.08    5.40
   4   1  -8  182.58    5.30
  -4   1  -8  176.38    5.60
  -8  -4   1  185.58    5.30
   8  -4  -1  194.68   14.10
  -4   1  -8  179.78    5.20
   8  -4  -1  175.78    5.10
  -8   4  -1  181.08    5.70
  -8   4  -1  186.48    6.00
   1  -8  -4  184.28    5.30
  -1   8  -4  175.18   15.20
   8  -4  -1  183.58    5.30
  -8   4  -1  161.98   14.70
  -1  -8   4  156.48   11.50
   4   1   8  182.08    5.30
  -4   1  -8  175.68    5.20
   1  -8  -4  190.68    5.50
  -1   8  -4  174.68    5.80
   1  -8  -4  183.88    5.00
   4  -1  -8  191.58    5.30
   4  -1  -8  177.08    5.20
  -4   1  -8  178.28    5.10
  -8   5   1   14.30   11.00
  -8   5   1    0.40    1.10
  -5  -1  -8    3.10    0.50
  -5  -1  -8    2.70    0.80
  -5  -1  -8    3.00    0.50
  -8   5   1    5.50    1.40
  -1  -8  -5    3.30    0.70
  -5  -1  -8    2.80    0.50
   8  -5   1    3.80    0.50
   8  -5   1    5.90    9.10
   8  -5   1    3.30    0.70
   1   8  -5    3.60    0.90
  -8  -5  -1    4.30    0.70
   5  -1   8    3.20    0.60
   5   1  -8    3.00    0.70
   5   1  -8    4.10    0.70
  -5   1   8    3.40    0.80
  -1  -8  -5    3.60    0.50
  -1  -8  -5    3.40    0.60
  -8  -5  -1    2.70    0.60
   1  -8   5    1.60    8.70
   1   8  -5   20.40    8.10
   1   8  -5    4.50    1.50
  -8  -5  -1    3.60    0.70
  -1  -8  -5    5.10    0.80
   1  -8  -5    3.90    0.80
   5  -1  -8    3.30    0.60
  -1  -8   5    3.50    8.60
   1  -8  -5    3.00    0.60
  -1   8  -5    3.50    0.90
  -8  -5   1    3.10    0.60
  -1   8  -5    1.40    1.40
   8  -5  -1    8.10    7.30
   8  -5  -1    4.20    0.60
  -1   8  -5   12.60   10.10
  -5   1  -8    4.20    1.00
  -8   5  -1   18.60    8.40
  -8   5  -1    4.50    1.30
   1  -8  -5    3.80    0.80
  -8   5  -1    3.10    1.10
  -5   1  -8    2.90    0.50
  -5   1  -8    3.60    0.60
   8  -5  -1    3.40    0.70
  -8  -5   1    4.30    0.60
   5  -1  -8    3.90    0.70
  -5   1  -8    2.80    0.60
  -8   6   1  146.39    5.00
   1   8  -6  134.69    4.40
   8  -6   1  135.89   15.80
   8  -6   1  148.19    4.20
   8  -6   1  148.69    4.30
  -6  -1  -8  140.59    4.20
  -6  -1  -8  138.19    4.20
  -8  -6  -1  135.49    4.40
  -6  -1  -8  140.79    4.20
  -6   1   8  139.59    4.50
  -8  -6  -1  142.19    4.30
   1   8  -6  163.08   16.80
   1   8  -6  141.09    5.20
  -1  -8  -6  138.39    4.40
  -1  -8  -6  147.29    4.30
  -1  -8  -6  144.09    4.20
  -8   6   1  151.18    5.10
  -6  -1  -8  142.79    4.40
  -8  -6  -1  149.88    4.30
   6   1  -8  140.69    4.30
   6   1  -8  139.29    4.30
  -1  -8  -6  135.59    4.20
   6  -1   8  145.89    4.40
  -8   6   1  175.58   18.80
  -8   6  -1  152.68    5.40
  -8   6  -1  144.89    5.00
  -1   8  -6  142.29    5.10
  -8   6  -1  122.29   15.10
   1  -8  -6  136.79    4.20
  -6   1  -8  138.19    4.10
   1  -8  -6  139.69    4.40
   6  -1  -8  139.59    4.30
  -6   1  -8  140.79    4.60
  -1  -8   6  133.19   15.50
  -6   1  -8  139.79    4.20
   6  -1  -8  143.59    4.30
   8  -6  -1  139.79    4.10
  -6   1  -8  142.79    4.30
  -6   1  -8  132.99    4.20
  -1   8  -6  139.09    4.40
  -8  -6   1  138.89    4.20
   8  -6  -1  139.29   16.20
  -6  -1   8  138.69    4.50
   8  -6  -1  140.19    4.40
   6   1   8  147.59    4.40
   1  -8  -6  146.99    4.30
   1  -8  -6  140.29    4.50
  -8  -6   1  147.89    4.30
  -7  -1  -8   31.50    1.40
  -7  -1  -8   32.40    1.50
  -8   7   1   32.10    1.90
   1   8  -7   31.00    1.70
  -1  -8  -7   34.00    1.50
  -7  -1  -8   32.80    1.80
   7  -1   8   34.00    1.70
  -8  -7  -1   34.20    1.60
  -1  -8  -7   35.40    1.60
   7   1  -8   31.90    1.60
  -8   7   1   30.10    2.70
   8  -7   1   33.80    1.30
   8  -7   1   32.60    1.70
  -8  -7  -1   30.70    1.70
  -8  -7  -1   32.80    1.50
  -1  -8  -7   32.60    1.70
  -7  -1  -8   32.50    1.70
  -7   1   8   31.80    1.80
  -1  -8  -7   34.10    1.40
  -7  -1  -8   33.20    1.40
   7   1  -8   33.60    1.60
   1  -8  -7   33.70    1.60
  -8   7  -1   32.80    2.10
   7  -1  -8   34.30    1.60
  -1   8  -7   30.50    1.70
  -8  -7   1   33.20    1.50
  -7   1  -8   33.10    1.60
   7  -1  -8   33.10    1.60
   1  -8  -7   33.00    1.40
  -8  -7   1   32.80    1.60
  -7   1  -8   33.90    2.00
   7   1   8   33.90    1.70
   8  -7  -1   33.90    1.40
  -8   7  -1   36.20    3.10
  -7  -1   8   38.70    1.90
   8  -7  -1   34.00    1.70
  -1   8  -7   29.50    2.80
   1  -8  -7   35.20    1.80
   1  -8  -7   31.90    1.80
   2   8   0  528.75   21.40
  -2  -8   0  549.05   15.00
   2  -8   0  527.05   15.00
  -8   0   2  505.85   15.10
  -8   0   2  541.75   14.80
  -8   0  -2  537.35   14.90
   8   0  -2  576.64   22.20
  -2   8   0  537.15   22.10
   0  -2  -8  545.85   17.20
   0  -2  -8  553.44   14.90
  -8   0   2  528.15   22.20
   2  -8   0  550.04   14.80
  -8   0  -2  529.55   20.20
   0   2  -8  545.05   14.80
   0   2  -8  559.64   14.80
   2  -8   0  506.95   21.30
  -8   0   2  527.95   14.90
   0   2  -8  516.35   19.10
   8   0   2  547.55   14.90
  -2  -8   0  554.54   20.60
   8   0  -2  553.84   14.90
   8   0   2  517.85   20.50
  -8   0  -2  555.74   15.00
   0   2  -8  539.15   14.80
   0   2  -8  551.74   19.10
   2  -8   1   74.69    2.50
  -8  -1  -2   64.29    7.80
  -2   8   1   72.29    9.70
   1   2  -8   79.89    2.50
   8  -1   2   76.79    2.50
   8   1  -2   66.89    9.30
   8   1  -2   73.49    2.50
  -2  -8  -1   76.19    2.60
  -8  -1  -2   74.79    2.50
  -8   1   2   87.29   10.50
   2   8  -1   89.49    9.30
  -1  -2  -8   74.29    4.50
  -1  -2  -8   82.69    5.10
  -1  -2  -8   76.59    2.40
  -8  -1  -2   72.69    2.50
   2  -8   1   80.19    8.70
  -8   1   2   70.79    2.80
  -8   1   2   73.49    2.40
   1   2  -8   87.29    8.10
  -2  -8  -1   68.89    7.90
   8  -1   2   79.79    9.20
   1   2  -8   87.79   10.20
  -8   1   2   76.59    2.60
   2  -8   1   76.19    2.60
   2   8   1   91.89   10.40
   8  -1  -2   74.69    2.50
  -1   2  -8   78.59    2.40
   1  -2  -8   70.79    8.30
   1  -2  -8   71.49    2.40
  -2  -8   1   77.69    9.60
  -8   1  -2   75.59    2.60
  -1   2  -8   77.49    2.40
  -1   2  -8   62.59    6.80
  -8  -1   2   75.39    9.90
   8  -1  -2   74.99    2.40
  -2   8  -1   82.99   10.40
   2  -8  -1   74.69    2.60
  -1   2  -8   72.79    7.50
  -1   2  -8   77.99    2.40
   2  -8  -1   77.19    2.50
  -8  -1   2   75.59    2.40
  -8  -1   2   71.89    2.50
  -8   1  -2   69.19    8.50
   2  -8  -1   77.79    9.10
   8   1   2   72.79    8.00
   8  -1  -2   79.79   10.70
   1   2   8   78.99    2.40
  -8  -2  -2   14.50    6.10
   8  -2   2    0.80    6.20
  -2  -8  -2    5.50    1.00
   2   2  -8   10.90    7.00
   2   2  -8    5.40    0.60
  -8  -2  -2    7.10    0.80
   2   2  -8   -0.50    6.10
   8  -2   2    8.30    0.70
  -8   2   2   12.80    8.90
  -8   2   2   11.30    1.00
  -8   2   2    9.10    1.10
  -8   2   2    7.30    0.60
   2   8  -2    5.70    8.00
  -2  -8  -2    5.00    6.30
  -2   8   2    8.60    7.80
   8  -2   2    7.30    0.80
   2  -8   2    1.30    7.30
   2  -8   2    7.20    0.80
  -2   2   8    8.20    5.60
  -8  -2  -2    7.90    0.70
   8   2  -2   19.10    7.70
  -2  -2  -8    5.80    0.60
   2  -2  -8    8.90    6.00
   2  -2  -8    7.20    0.70
  -2   8  -2    2.30    8.60
   2   8   2    8.80    6.50
  -8  -2   2    8.30    0.70
  -8   2  -2    9.70    7.20
  -2   2  -8    7.30    0.60
  -2   2  -8    8.80    0.80
  -8   2  -2    7.50    0.90
  -2  -8   2   -2.70    6.80
  -8   2  -2    7.90    1.40
   8  -2  -2    8.50    0.80
  -2   2  -8    7.00    4.80
  -8  -2   2    6.50    6.20
   2  -8  -2    8.10    7.10
   2  -8  -2    8.20    0.90
   8   2   2   13.40    6.00
  -2   2  -8    8.70    0.80
   2   2   8    7.80    0.80
   2  -8  -2    8.10    0.90
   8  -2  -2    9.30    7.70
   2  -2  -8    7.80    0.80
   8  -2  -2    8.70    0.80
   8   3  -2   68.69    9.20
  -3  -2  -8   69.79    2.20
   8  -3   2   64.49    8.90
  -8   3   2   65.79    2.10
  -8   3   2   67.19    2.60
   2  -8   3   73.89    9.60
  -8   3   2   73.49   11.00
   8  -3   2   66.89    2.30
   8   3  -2   73.59   10.20
   3   2  -8   75.99    9.80
   2  -8   3   65.79    2.40
  -2  -8  -3   69.39    2.40
   8  -3   2   71.49    2.30
   3   2  -8   69.49    2.30
  -8   3   2   69.99    2.80
  -8  -3  -2   66.19    2.30
  -8  -3  -2   68.89    2.30
  -2  -8  -3   66.09    2.20
  -3   2  -8   66.99    2.30
   8  -3  -2   68.29    9.80
  -2  -8   3   46.40   10.90
   8   3   2   61.99    9.40
  -8  -3   2   69.29    2.30
  -8   3  -2   72.59    9.50
   2  -8  -3   69.99    2.30
  -8   3  -2   70.49    2.70
   3  -2  -8   70.09    2.40
  -3   2  -8   66.39    2.20
  -3   2  -8   66.59    2.20
   2  -8  -3   67.29    1.90
   3   2   8   67.49    2.30
   2  -8  -3   69.19    2.50
  -3   2  -8   64.59    3.00
   8  -3  -2   68.99    2.40
   8  -3  -2   66.59    2.10
   3  -2  -8   66.39    2.30
  -2   8  -3   73.89   10.80
  -8   3  -2   71.49    3.30
  -4  -2  -8  169.58    4.90
   2   8  -4  153.38   12.70
  -2  -8  -4  174.68    5.00
   2  -8   4  163.08    5.00
  -8   4   2  169.28    5.40
  -8   4   2  171.38    5.30
  -8  -4  -2  162.78    5.00
   8   4  -2  169.18   14.80
   8   4  -2  161.48    4.60
  -4  -2  -8  161.98    4.80
  -8   4   2  165.78   16.30
   8  -4   2  183.18    4.90
  -2  -8  -4  173.88    4.90
  -4  -2  -8  171.58    4.80
  -8  -4  -2  161.98    4.90
   8  -4   2  145.29   13.30
   8  -4   2  170.08    4.90
  -4   2   8  157.88    5.10
  -8  -4  -2  176.78    5.00
  -2  -8  -4  161.68    5.00
  -4  -2  -8  166.68    5.00
   2  -8   4  164.58   13.50
   8   4  -2  161.98    4.60
   4   2  -8  172.68    5.00
   2  -8  -4  172.58    5.10
  -8   4  -2  179.48    5.40
   2  -8  -4  171.98    4.90
   8  -4  -2  165.18    4.80
  -4   2  -8  164.88    5.00
  -8   4  -2  161.88    6.00
   4  -2  -8  171.98    4.90
   8  -4  -2  168.08    5.00
  -8  -4   2  175.88    4.90
  -2  -8   4  149.29   11.60
  -2   8  -4  159.98    5.50
  -4   2  -8  168.98    4.80
  -4   2  -8  169.98    5.40
   4  -2  -8  166.98    4.90
   2  -8  -4  169.88    5.20
   8  -4  -2  156.88   14.60
   4   2   8  173.88    5.00
  -8   4  -2  171.68   14.20
  -2   8  -4  165.88   15.70
  -4   2  -8  167.08    4.90
  -4   2  -8  171.18    5.00
   8  -5   2  778.92   20.10
   2  -8   5  692.43   26.60
  -2  -8  -5  708.33   20.20
  -5  -2  -8  771.02   20.00
  -5   2   8  717.93   20.30
   2   8  -5  655.13   28.80
  -8   5   2  736.83   20.50
  -2  -8  -5  752.72   20.10
  -8  -5  -2  752.32   20.20
   8  -5   2  725.83   20.10
   5  -2   8  783.22   20.30
   5   2  -8  778.32   20.20
   5   2  -8  698.93   20.00
  -5  -2  -8  739.33   20.20
   2   8  -5  691.03   20.70
  -8  -5  -2  734.93   20.10
  -8  -5  -2  735.63   20.20
  -2  -8  -5  711.13   20.00
  -2  -8  -5  764.22   20.20
  -8   5   2  735.23   20.60
  -5  -2  -8  750.22   20.10
   8   5  -2  704.13   28.90
  -8   5   2  699.33   30.20
  -5  -2  -8  758.02   20.00
   8  -5  -2  727.63   29.10
  -2  -8   5  693.63   28.00
   2  -8  -5  743.93   20.30
   2  -8  -5  717.73   20.20
  -2   8  -5  733.53   20.20
   2  -8  -5  764.42   20.20
   5  -2  -8  714.23   20.20
  -5   2  -8  755.32   20.20
  -8  -5   2  687.53   20.20
  -8  -5   2  743.93   20.10
   8  -5  -2  728.43   20.00
  -5   2  -8  746.23   20.10
  -2   8  -5  752.72   29.30
  -5   2  -8  671.73   20.10
  -5   2  -8  712.13   19.90
   5  -2  -8  753.72   20.10
  -2   8  -5  726.33   20.60
   5  -2  -8  741.23   20.10
  -8   5  -2  753.92   21.00
  -8   5  -2  751.22   20.60
  -5   2  -8  755.82   20.50
   8  -5  -2  738.93   20.20
  -2  -8  -6   13.70    1.10
  -2  -8  -6   14.40    1.00
  -6  -2  -8   12.90    1.30
  -6  -2  -8   16.00    1.40
  -6  -2  -8   14.50    0.90
   8  -6   2   14.00    1.00
   8  -6   2   14.30    1.20
  -8   6   2   11.20    1.60
   2   8  -6  -10.10   11.20
   2   8  -6   14.60    1.90
  -8  -6  -2   13.00    1.10
   6   2  -8   13.40    1.20
   6   2  -8   15.70    1.20
  -6   2   8   16.90    1.40
   6  -2   8   16.00    1.20
   2   8  -6   14.60    1.40
  -2  -8  -6   13.40    1.30
  -2  -8  -6   12.70    1.20
  -8  -6  -2   15.50    1.20
  -8  -6  -2   15.10    1.10
  -8   6   2   15.00    1.60
  -6  -2  -8   14.40    0.90
  -6  -2  -8   14.20    1.00
  -6   2  -8   12.90    1.20
   8  -6  -2   15.90    1.00
  -2  -8   6   -4.30   10.30
   6  -2  -8   13.70    1.20
   2  -8  -6   11.60    1.70
   2  -8  -6   14.30    1.40
   6  -2  -8   15.50    1.10
   2  -8  -6   12.40    1.00
   6  -2  -8   13.40    1.10
  -8  -6   2   13.00    1.10
  -8  -6   2   15.90    1.60
  -6   2  -8   14.20    1.00
  -6   2  -8   13.30    1.40
  -2   8  -6   16.90    1.40
   6   2   8   14.00    1.10
  -8   6  -2   14.00    2.10
  -8   6  -2   16.10    1.70
  -2   8  -6   12.60    1.70
  -8  -6   2   11.90    1.00
   2  -8  -6   15.10    1.10
  -7  -2  -8  119.59    3.70
   7   2  -8  123.29    3.80
  -7  -2  -8  126.99    4.00
  -8   7   2  123.59    4.70
  -7  -2  -8  121.39    3.70
  -7  -2  -8  117.59    3.80
   8  -7   2  129.99    3.80
  -2  -8  -7  120.89    3.80
   8  -7   2  125.79    3.90
  -7  -2  -8  126.09    3.80
   2   8  -7  128.79    5.00
  -8  -7  -2  130.79    3.90
  -8  -7  -2  120.89    3.80
  -7   2   8  126.29    4.10
   7   2  -8  131.09    4.00
  -8  -7  -2  121.59    4.00
  -2  -8  -7  122.49    4.00
   7  -2   8  130.49    4.00
  -2  -8  -7  121.99    3.70
  -2  -8  -7  130.79    3.90
   2   8  -7  119.89    4.00
  -8  -7   2  125.49    3.90
   7  -2  -8  117.29    3.70
  -7   2  -8  118.09    3.90
   7   2   8  127.59    4.00
  -7  -2   8  124.79    4.10
   7  -2  -8  125.79    3.90
   7  -2  -8  129.49    3.90
  -2   8  -7  125.29    4.80
   2  -8  -7  126.89    4.10
  -8  -7   2  122.29    3.80
  -8   7  -2  111.09    5.10
   8  -7  -2  121.39    3.70
   2  -8  -7  119.39    3.80
  -8  -7   2  118.39    4.00
  -8   7  -2  122.59    4.30
   8  -7  -2  123.39    4.00
  -2   8  -7  123.99    4.00
   2  -8  -7  122.09    4.00
   2  -8  -7  126.29    3.90
  -7   2  -8  126.29    4.30
   0   3  -8   -0.10    5.40
   0  -3  -8   -1.30    0.70
  -3  -8   0   -0.10    0.60
  -3   8   0   -7.20    7.90
   3  -8   0   -0.30    0.50
   0   3  -8    0.10    0.50
   0   3  -8   -0.20    0.40
   0   3   8   -0.30    0.40
   0  -3  -8    0.80    4.20
  -8   0   3    0.50    0.90
  -8   0   3    0.10    0.40
  -8   0   3    0.40    0.50
  -3  -8   0  -12.30    6.20
   3  -8   0   14.10    7.80
   3  -8   0   -0.70    0.70
  -8   0  -3    0.70    0.60
   8   0   3   -0.30    0.50
   8   0   3    0.00    0.50
   8   0  -3    0.50    0.50
   8   0   3    0.80    5.40
  -8   0  -3    3.40    6.40
  -8   0  -3   -0.60    0.40
   3   8   0   10.50    6.80
   8   0  -3   -3.10    7.80
  -8   0   3   -1.40    6.60
   0   3  -8    0.00    0.40
  -8  -1  -3  196.68    5.60
  -3   8   1  190.58   14.50
   1   3  -8  179.18   11.10
   1   3  -8  182.88   12.20
  -8   1   3  189.38    5.80
   1   3  -8  196.48    5.50
   3  -8   1  172.28   13.80
   3  -8   1  185.58    5.50
  -8   1   3  191.98   15.10
   3   8  -1  199.88   14.00
   1   3  -8  196.98    5.50
  -8  -1  -3  189.28    5.60
  -1  -3  -8  195.88    7.00
   8  -1   3  208.68    5.60
   8  -1   3  187.28    5.50
   8   1  -3  192.98   14.30
   8   1  -3  189.58    5.60
   1   3  -8  190.68    5.50
  -1  -3  -8  201.68    7.40
  -1  -3  -8  173.88    5.60
   3  -8   1  187.98    5.70
  -1   3   8  210.98   10.20
  -8   1   3  190.98    5.60
  -3  -8  -1  176.68   11.40
  -3  -8  -1  195.78    5.60
   8  -1   3  182.08   12.00
  -8   1   3  187.98    5.40
  -1   3   8  201.48    5.40
  -1   3  -8  193.88    5.50
   1  -3  -8  187.68   10.70
  -1   3  -8  190.78    5.50
  -8  -1   3  184.78    5.50
   1  -3  -8  187.88    5.50
   1  -3  -8  187.48    5.60
  -8   1  -3  218.68   18.50
   8  -1  -3  190.48    5.50
   8  -1  -3  197.78    5.60
   3  -8  -1  178.68   11.80
   3  -8  -1  191.38    5.50
   3   8   1  202.88   15.10
   1   3   8  197.18    5.50
  -8   1  -3  199.48    5.70
  -8  -1   3  190.38    5.80
   3  -8  -1  189.38    5.70
  -3   8  -1  209.28   15.20
  -8  -1   3  172.98   14.90
   8  -1  -3  203.58   12.50
  -3  -8   1  185.98   12.60
  -8  -2  -3  256.27    7.60
  -8   2   3  261.67    7.80
  -8   2   3  266.67    7.40
   3  -8   2  279.17   16.00
   8  -2   3  257.67    7.50
   2   3  -8  253.17   14.20
   2   3  -8  263.47    7.50
  -3  -8  -2  274.07    7.60
   3  -8   2  257.87    7.60
  -8   2   3  247.28   14.70
   2   3  -8  262.37    7.40
   8   2  -3  274.87   16.40
   8   2  -3  257.77    7.50
  -8  -2  -3  271.27    7.60
   8  -2   3  277.77    7.60
  -3   8   2  282.77   16.70
   3   8  -2  256.47   15.80
  -2  -3  -8  271.37    7.50
  -8   2   3  260.87    7.60
  -2   3   8  270.17   13.30
   2   3   8  271.47    7.50
   2  -3  -8  259.47    7.50
  -3   8  -2  283.47   15.10
   2  -3  -8  261.37    7.50
   8  -2  -3  295.07   16.60
   2  -3  -8  278.17   13.50
   3  -8  -2  262.67    7.60
   8  -2  -3  267.17    7.40
   8  -2  -3  267.47    7.60
  -8  -2   3  258.67    7.50
  -8   2  -3  254.47    8.20
  -8  -2   3  259.67    7.70
  -2   3  -8  265.27    7.40
  -2   3  -8  270.17    7.50
  -2   3  -8  264.27    7.50
  -3  -8   2  251.27   14.80
   3  -8  -2  263.17    7.50
   3  -8  -2  260.67   15.30
   3   3  -8  460.85   12.60
   8   3  -3  436.46   19.50
  -8   3   3  432.16   21.90
  -8   3   3  447.26   12.70
  -8   3   3  449.16   12.40
   8  -3   3  449.46   12.50
   8   3  -3  454.45   23.00
   3  -8   3  458.75   20.50
  -3  -3  -8  458.55   12.50
  -3  -8  -3  458.85   12.50
  -8   3   3  459.15   12.80
   3   8  -3  447.06   21.10
  -3  -8  -3  469.55   12.60
  -8  -3  -3  442.26   12.60
  -8  -3  -3  472.45   12.60
  -8  -3  -3  408.76   12.50
   8  -3   3  472.85   12.60
   3  -8   3  440.96   12.60
   8  -3  -3  452.45   12.40
   3   3   8  474.35   12.60
   3  -8  -3  455.75   12.50
   3  -8  -3  457.95   12.70
  -3   3  -8  426.06   12.50
   3  -3  -8  458.45   12.60
  -8  -3   3  435.96   12.70
   8  -3  -3  459.65   12.60
  -3   3  -8  448.76   12.40
  -8   3  -3  459.05   12.80
  -3   3  -8  463.05   12.60
   8  -3  -3  441.86   21.10
  -3   8  -3  421.06   12.90
   3  -3  -8  457.15   12.50
  -3  -8   3  447.46   19.90
  -8   3  -3  446.86   13.30
  -3   8  -3  459.95   21.70
   3  -3  -8  450.45   12.50
  -8  -3   3  450.45   12.50
  -3   3  -8  457.75   12.50
  -4  -3  -8   95.79    3.00
  -3  -8  -4   95.29    3.00
  -8  -4  -3   97.09    3.10
   3  -8   4   92.79   11.20
  -3  -8  -4   91.39    3.10
  -8   4   3   84.49   10.90
  -3  -8  -4  102.99    3.10
  -8   4   3   95.99    3.50
  -8   4   3  100.09    3.50
   8  -4   3  100.59    3.00
   8  -4   3   96.09    3.00
   8   4  -3   95.39    2.70
   3   8  -4   76.39   11.80
   8   4  -3   94.39    2.70
  -4   3   8   99.59    3.40
   4   3  -8   94.89    4.40
   8   4  -3   94.29   12.20
  -8  -4  -3   95.19    3.00
  -4  -3  -8   96.89    3.00
  -8  -4  -3   91.29    3.10
   3  -8   4   94.49    3.10
  -3  -8  -4   96.89    3.00
  -4   3  -8   90.99    3.10
  -4   3  -8  100.59    3.10
   8  -4  -3   92.19    3.10
  -4   3  -8   93.09    2.90
  -8   4  -3   93.59    3.50
   3  -8  -4   90.29    3.20
   4  -3  -8   88.29    2.90
   3  -8  -4   99.19    3.00
   8  -4  -3   95.69    2.90
  -8  -4   3   95.49    3.00
  -3  -8   4  106.39   10.60
  -3   8  -4   79.59   12.30
  -3   8  -4   90.29    3.70
   4  -3  -8   90.69    3.20
  -8  -4   3   94.19    3.30
   3  -8  -4   96.39    3.20
   8  -4  -3  117.29   14.40
   4  -3  -8   99.99    3.00
  -4   3  -8   94.59    3.70
   4   3   8   96.69    3.10
  -4   3  -8   99.29    3.10
   4  -3  -8   97.09    3.10
  -8   4  -3  100.29    4.30
   8  -5   3  600.94   16.20
  -3  -8  -5  587.74   16.20
  -5   3   8  583.04   16.30
   8   5  -3  597.34   16.00
   8   5  -3  611.14   26.70
   8  -5   3  617.34   16.20
  -8  -5  -3  588.34   16.20
  -8  -5  -3  581.74   16.30
  -3  -8  -5  591.74   16.30
  -3  -8  -5  614.14   16.20
  -3  -8  -5  583.84   16.20
   8   5  -3  591.84   15.90
  -8  -5  -3  622.44   16.20
  -5  -3  -8  547.45   16.30
  -5  -3  -8  596.04   16.20
  -5  -3  -8  603.04   16.10
   5   3  -8  573.64   16.10
   3  -8   5  574.84   16.20
   3   8  -5  578.74   26.20
   3   8  -5  560.04   16.80
  -8   5   3  592.14   16.60
  -5  -3  -8  608.94   16.10
  -5  -3  -8  547.45   16.20
  -8   5   3  561.14   16.60
  -8   5  -3  595.94   16.70
  -8  -5   3  584.54   16.30
   5  -3  -8  561.54   16.10
   5  -3  -8  608.24   16.20
   8  -5  -3  597.04   16.10
   8  -5  -3  597.34   16.30
  -3  -8   5  579.44   25.00
   3  -8  -5  576.94   16.40
  -5   3  -8  576.64   16.20
  -5   3  -8  570.74   16.00
  -5   3  -8  588.84   16.60
   5  -3  -8  586.84   16.20
   5  -3  -8  590.54   16.30
   3  -8  -5  588.24   16.30
   5   3   8  543.55   16.50
  -3   8  -5  574.74   16.70
  -3   8  -5  598.94   16.30
   3  -8  -5  606.74   16.20
  -8   5  -3  572.14   17.10
  -8  -5   3  622.34   16.20
   3   8  -6   12.70    1.10
   3   8  -6   12.60    1.90
  -3  -8  -6   10.90    0.90
  -3  -8  -6   12.30    1.00
  -3  -8  -6   12.00    1.20
  -3  -8  -6   12.90    1.10
  -3  -8  -6   12.70    1.30
   6   3  -8   11.40    1.10
  -6  -3  -8   12.10    0.80
  -6  -3  -8   13.30    1.20
   6  -3   8   12.20    1.20
  -8  -6  -3   12.10    1.20
  -8  -6  -3    9.80    1.10
  -6   3   8   12.80    1.40
   3   8  -6    5.60   12.00
  -8  -6  -3   12.00    1.00
  -8   6   3   11.40    1.40
   8  -6   3   12.70    1.00
   8  -6   3   13.20    1.20
  -6  -3  -8   11.80    1.00
  -6  -3  -8   11.30    0.90
  -6   3  -8   11.30    1.00
   6  -3  -8   10.40    1.00
   6  -3  -8   12.50    1.10
   3  -8  -6   11.90    1.10
   6  -3  -8   14.00    1.40
   3  -8  -6   11.00    1.00
   3  -8  -6   14.20    1.10
  -6   3  -8   13.80    1.50
  -3   8  -6   13.30    1.20
   6   3   8   12.00    1.10
   3  -8  -6   13.00    1.20
   8  -6  -3   12.70    1.20
  -3  -8   6    7.20   11.10
  -3   8  -6   12.50    1.70
  -8   6  -3   14.30    1.60
   6  -3  -8   12.40    1.20
   8  -6  -3   12.50    1.00
  -8  -6   3   12.70    1.50
  -8   6  -3   10.10    1.80
  -8  -6   3   10.40    1.10
  -7  -3  -8   45.90    1.80
  -7  -3  -8   45.60    1.90
  -7  -3  -8   43.90    1.70
   8  -7   3   47.60    2.00
  -8  -7  -3   48.50    1.90
   8  -7   3   48.10    1.80
   3   8  -7   42.90    3.30
   3   8  -7   45.00    2.10
  -8  -7  -3   46.00    1.80
  -7   3   8   44.40    2.20
  -3  -8  -7   45.60    1.80
  -3  -8  -7   46.00    2.00
  -8  -7  -3   40.60    2.00
  -3  -8  -7   46.80    2.00
   7   3  -8   48.80    1.90
  -8   7   3   43.20    2.80
  -7  -3  -8   47.70    2.00
  -3  -8  -7   48.00    1.80
   7  -3   8   47.90    2.00
  -7  -3  -8   45.30    1.60
  -7   3  -8   46.80    2.60
  -8   7  -3   45.40    2.50
  -3   8  -7   44.10    3.00
   3  -8  -7   47.80    2.40
   3  -8  -7   46.50    2.10
   7  -3  -8   45.60    1.80
  -7  -3   8   48.60    2.10
  -7  -3   8   48.00    1.90
  -8  -7   3   43.70    1.80
   7   3   8   46.60    2.00
   8  -7  -3   48.70    1.70
  -3   8  -7   44.70    2.00
  -8  -7   3   47.20    1.90
   7  -3  -8   50.09    1.90
   3  -8  -7   44.30    1.80
  -8  -7   3   48.30    2.20
  -7   3  -8   43.80    1.90
   8  -7  -3   47.60    2.00
   7  -3  -8   42.70    2.60
   3  -8  -7   47.00    1.90
   4  -8   0   15.00    8.80
   8   0  -4    2.20    8.50
  -8   0   4    2.60    0.60
   0   4  -8    2.50    0.50
  -8   0   4    7.20    9.50
  -8   0   4    2.50    0.80
   0   4  -8    2.10    0.50
   8   0  -4    3.20    0.70
   0   4  -8    2.20    0.70
  -4   8   0   -0.80    8.80
  -4   8   0    1.60    1.10
   0  -4  -8    7.60    4.70
   0  -4  -8    2.30    0.50
   0  -4  -8    2.80    0.60
   0  -4  -8    2.60    0.80
   0   4   8   -3.00    4.30
   0   4   8    2.30    0.40
   4  -8   0    2.10    0.60
   4  -8   0    3.50    0.70
   8   0   4    2.70    0.60
   0   4  -8    2.50    0.60
   1   4  -8    4.10    0.60
   8  -1   4    5.20    0.70
   8  -1   4    4.30    0.70
   8   1  -4    1.20    8.70
   4  -8   1    4.90    0.80
  -8   1   4    4.60    0.80
   1   4  -8    3.10    0.50
  -4   8   1    8.70    7.30
  -4  -8  -1    5.10    0.80
  -8   1   4    4.20    0.50
  -1  -4  -8    2.90    0.60
   4  -8   1    6.60    8.40
   1   4  -8    3.40    0.60
  -4   8   1    3.50    0.90
  -8  -1  -4    4.50    0.70
  -8   1   4    4.70    1.00
  -1   4   8    3.80    0.40
   4  -8   1    2.90    0.60
  -1  -4  -8    4.50    0.60
  -1  -4  -8    6.60    3.40
   8   1  -4    5.70    0.70
   1   4  -8    2.80    1.70
  -1   4   8    4.50    5.20
  -8   1   4   14.30    9.60
   1  -4  -8    2.80    0.80
  -4   8  -1   -6.00    9.70
  -8  -1   4    4.30    0.60
  -1   4  -8    3.80    0.60
   1  -4  -8    8.10    5.70
   1   4   8    3.90    0.50
  -1   4  -8    4.90    0.60
   8  -1  -4   13.90    9.20
   8  -1  -4    3.60    0.50
   8  -1  -4    4.00    0.70
  -8   1  -4    3.30    0.80
  -4   8  -1    3.70    1.00
  -1   4  -8    2.10    0.60
   4  -8  -1    3.80    0.60
  -8  -1   4    2.10    0.80
   4  -8  -1    3.30    0.70
  -8   1  -4    5.60    2.00
   1  -4  -8    4.50    0.70
   4  -8  -1   23.20    6.90
  -8  -1   4   -4.00    9.50
  -4   8  -1    1.30    1.70
   1  -4  -8    3.20    0.50
  -1   4  -8    3.80    0.60
  -8   2   4  149.49    4.70
   2   4  -8  153.28    4.50
  -4  -8  -2  159.98    4.60
   8  -2   4  162.58    4.70
   8  -2   4  153.78    4.60
   8   2  -4  180.58   15.30
  -8   2   4  164.48    4.50
   4  -8   2  179.98   12.10
  -2  -4  -8  151.28    4.60
  -2   4   8  159.28    4.40
  -8   2   4  175.08   16.40
  -8   2   4  158.78    4.90
   2   4  -8  147.49    5.70
   2   4  -8  154.98    4.60
  -8  -2  -4  152.98    4.70
  -8  -2  -4  153.88    4.70
  -4  -8  -2  158.88    4.60
  -4  -8  -2  158.28    4.70
   8   2  -4  159.78    4.60
  -2  -4  -8  146.99    4.60
   4  -8   2  152.08    4.70
  -8  -2   4  153.58    4.80
  -4   8  -2  153.18    5.00
  -2   4  -8  162.38    4.60
   2  -4  -8  146.49    4.80
  -2   4  -8  153.88    4.50
  -4   8  -2  130.69    5.70
  -8   2  -4  162.38    4.90
   8  -2  -4  155.38   14.80
   2   4   8  160.08    4.60
   4  -8  -2  157.88    4.50
   2  -4  -8  145.99    4.50
   4  -8  -2  157.18    4.80
   2  -4  -8  152.08    4.70
   8  -2  -4  159.68    4.70
   2  -4  -8  158.88    4.60
  -2   4  -8  152.78    4.60
  -2   4  -8  154.18    4.60
  -8  -2   4  151.88    4.60
  -8   2  -4  157.38    5.70
   8  -2  -4  160.18    4.50
  -4   8  -2  171.68   13.10
  -8  -3  -4  276.77    8.20
  -8   3   4  292.27    8.40
  -8  -3  -4  299.87    8.20
   3   4  -8  290.27    8.10
   3   4  -8  271.47    9.00
  -4  -8  -3  295.27    8.10
  -8   3   4  289.57    8.40
  -8   3   4  283.77    7.90
  -8  -3  -4  273.97    8.10
   8  -3   4  282.97    8.10
   8   3  -4  275.57   18.10
  -4  -8  -3  276.97    8.10
   4  -8   3  277.37    8.20
   8  -3   4  290.87    8.20
  -4  -8  -3  281.27    8.10
  -3  -4  -8  294.57    8.10
  -3  -4  -8  280.47    8.20
  -3   4   8  295.07    7.90
  -3  -4  -8  275.17    8.10
  -8   3   4  270.57   16.60
   4  -8   3  296.37   17.40
   3   4  -8  289.97    8.10
  -4  -8  -3  296.77    8.20
   4  -8  -3  294.17    8.30
   3  -4  -8  277.77    8.30
  -8  -3   4  281.07    8.10
  -3   4  -8  296.07    8.20
   8  -3  -4  286.97    8.00
  -4   8  -3  270.47   18.70
  -4   8  -3  284.27    8.50
   8  -3  -4  288.57   18.00
   3  -4  -8  289.17    8.10
   4  -8  -3  296.07    8.10
   3   4   8  299.17    8.10
   3  -4  -8  295.17    8.20
  -8   3  -4  281.87    9.10
   8  -3  -4  294.37    8.20
   3  -4  -8  281.27    8.00
  -8  -3   4  294.17    8.30
  -3   4  -8  288.57    8.00
  -3   4  -8  289.87    8.20
  -3   4  -8  285.97    8.20
  -8   3  -4  292.97    8.50
  -8   4   4   12.60    1.40
  -8  -4  -4   14.10    1.10
  -8  -4  -4   11.10    1.10
  -8  -4  -4    9.60    1.00
   8  -4   4   11.30    1.10
   4   4  -8   10.20    0.80
  -4  -8  -4    9.50    1.00
   4  -8   4   12.60    1.30
  -4  -8  -4   12.50    1.20
  -4  -8  -4   11.80    1.00
  -4  -4  -8   10.00    1.00
   4   4  -8   10.60    0.90
  -4  -4  -8   10.70    1.00
  -4  -4  -8   10.40    1.10
  -4  -4  -8    8.10    0.90
   8  -4   4   11.80    1.00
   4   4  -8   10.10    2.10
  -8   4   4   13.30    1.40
   4  -8   4   10.20    9.80
   8   4  -4   26.00   10.80
  -4  -8  -4   12.10    1.00
   4  -4  -8   11.30    0.90
   4  -8  -4    9.40    1.00
  -8   4  -4   10.50    1.20
   4   4   8   10.50    1.00
   8  -4  -4   11.90    0.90
   8  -4  -4   13.60    1.20
  -4   4  -8   11.60    1.00
  -4   4  -8   10.30    0.90
  -4   8  -4   13.50   10.60
  -4   8  -4   11.40    1.50
   4  -4  -8   10.70    1.00
  -8  -4   4   11.30    1.40
  -8  -4   4   10.60    1.00
   4  -8  -4   11.60    1.00
  -8   4  -4   14.90    2.00
   4  -4  -8   12.60    1.10
   4  -8  -4   12.40    1.10
   4  -4  -8   11.60    1.30
  -4  -8  -5    2.70    0.60
   8  -5   4    2.40    0.60
   8  -5   4    2.80    0.70
  -8  -5  -4    2.50    0.60
   8   5  -4   14.50   12.00
   8   5  -4    2.90    0.50
   4  -8   5    2.10    0.90
  -8  -5  -4    3.50    0.70
   5   4  -8    2.60    0.50
   5   4  -8    2.60    0.50
   5   4  -8    3.00    1.90
   8   5  -4    3.10    0.50
  -5  -4  -8    3.20    0.70
  -5   4   8    3.40    0.90
  -5  -4  -8    2.00    0.60
  -4  -8  -5    2.20    0.70
  -5  -4  -8    3.40    0.70
   4   8  -5    3.70    1.70
  -8  -5  -4    2.60    0.70
  -8   5   4    3.30    1.20
  -5  -4  -8    3.80    0.60
  -4  -8  -5    2.70    0.60
  -8   5   4    2.60    1.40
   5   4  -8    3.50    0.70
  -8  -5  -4    3.70    0.70
  -4  -8  -5    2.70    0.70
  -8   5  -4    3.00    1.80
   8  -5  -4    3.20    0.70
   5  -4  -8    2.40    0.80
  -5   4  -8    2.00    0.70
  -5   4  -8    3.70    1.30
   8  -5  -4    3.50    0.60
  -4   8  -5    2.40    1.20
  -8   5  -4    2.00    1.10
  -4   8  -5    3.80    0.90
  -8  -5   4    2.60    0.90
  -8  -5   4    3.00    0.60
  -5  -4   8    3.60    0.70
   5  -4  -8    2.50    0.60
   5  -4  -8    3.60    0.70
   5  -4  -8    2.70    0.80
   4  -8  -5    3.80    0.70
   4  -8  -5    3.60    0.80
   4  -8  -5    3.00    0.80
   5   4   8    3.30    0.70
  -4  -8  -6   15.80    1.10
  -4  -8  -6   13.60    1.10
  -6  -4  -8   13.50    1.20
  -6  -4  -8   13.10    0.90
  -6  -4  -8   14.50    1.10
  -4  -8  -6   13.00    1.30
  -8  -6  -4   12.60    1.20
   6   4  -8   13.00    1.20
  -8  -6  -4   17.10    1.30
   4   8  -6   18.40    2.10
   4   8  -6   12.50    1.20
  -8  -6  -4   14.50    1.20
  -8  -6  -4   13.80    1.10
  -6   4   8   14.10    1.50
   6  -4   8   14.10    1.20
  -8   6   4   11.90    1.50
  -6  -4  -8   14.10    0.80
  -6  -4  -8   14.50    1.10
  -4  -8  -6   14.30    1.10
  -6  -4  -8   15.90    1.20
   8  -6   4   15.00    1.10
   8  -6   4   15.00    1.30
  -4  -8  -6   14.10    1.20
   8  -6  -4   15.70    1.30
   4  -8  -6   11.80    1.10
  -8  -6   4   15.80    1.50
  -6  -4   8   13.20    1.20
  -6   4  -8   17.30    1.30
  -8  -6   4   15.20    1.10
   4  -8  -6   13.30    1.40
  -8   6  -4   11.80    1.50
  -4   8  -6   15.50    1.80
  -4   8  -6   14.90    1.40
   6   4   8   15.30    1.20
  -6   4  -8   16.00    1.70
   6  -4  -8   14.70    1.10
  -8   6  -4   14.40    2.20
  -8   6  -4   14.30    1.60
   4  -8  -6   14.30    1.10
   6  -4  -8   13.40    1.00
   8  -6  -4   15.00    1.00
   4  -8  -6   13.00    1.00
   6  -4  -8   14.70    1.30
   6  -4  -8   10.50    1.10
   7  -4   8    1.50    0.70
  -7  -4  -8    1.90    0.70
  -7  -4  -8    0.60    0.70
  -7  -4  -8    0.50    0.60
  -7  -4  -8    0.90    0.50
  -4  -8  -7    0.90    0.50
   4   8  -7    2.30    0.90
  -8  -7  -4    0.60    0.60
   4   8  -7    0.00    1.50
  -4  -8  -7    1.40    0.70
  -8   7   4    0.80    1.20
  -8  -7  -4    0.50    0.70
  -7   4   8    1.90    1.00
   7   4  -8    1.20    0.70
   8  -7   4    1.80    0.80
  -7  -4  -8    1.30    0.50
  -4  -8  -7    1.70    0.70
  -4  -8  -7    1.40    0.60
  -8  -7  -4    1.30    0.70
  -7  -4  -8    0.00    0.70
   8  -7   4    0.70    0.60
   4  -8  -7    2.50    0.80
  -8  -7   4    1.30    0.60
   7  -4  -8    1.70    0.60
   4  -8  -7    1.00    0.60
  -8   7  -4   -0.60    1.20
   8  -7  -4    1.50    0.60
  -7  -4   8    2.50    0.70
  -7   4  -8    0.00    2.20
   8  -7  -4   -0.20    0.70
  -8   7  -4   -0.50    1.60
   7   4   8    2.60    0.80
   7  -4  -8   -0.40    0.80
   7  -4  -8    1.10    0.60
   4  -8  -7    1.70    0.80
  -8  -7   4    1.50    0.90
  -7   4  -8    0.40    0.70
  -7   4  -8    0.80    1.10
  -4   8  -7    1.80    0.90
   7  -4  -8    1.50    0.70
   4  -8  -7    1.10    0.60
  -8  -7   4    0.10    0.60
  -4   8  -7    0.10    1.40
  -8   0  -5    0.10    0.70
   5  -8   0    0.10    0.50
   0   5  -8    0.00    0.50
   0   5  -8    0.60    0.70
   0   5   8   -0.10    0.40
   5  -8   0    7.40    9.40
   0  -5  -8    0.10    0.50
   0   5   8    4.10    4.90
  -8   0   5   -1.00    0.60
  -5  -8   0    0.80    0.60
   0  -5  -8   -1.30    0.80
   8   0  -5   -0.50    0.60
  -8   0   5    0.50   10.30
   5  -8   0   -0.40    0.60
   8   0  -5    4.50    7.30
   8   0  -5   -0.10    0.50
   0   5  -8    0.00    0.50
   8   0   5    0.70    0.70
  -5   8   0    0.80    1.80
  -5   8   0   13.00    8.30
   0  -5  -8    0.70    0.50
   0  -5  -8    1.30    0.70
   0  -5  -8    6.50    5.40
  -8   0   5    0.10    0.80
   0   5  -8   -0.90    1.60
  -5   8   0    0.30    0.90
  -5   8   1   48.60    3.30
   5  -8   1   53.79    2.10
   1   5  -8   49.80    1.90
  -1  -5  -8   56.99    6.40
  -1  -5  -8   47.10    1.80
  -8   1   5   50.09    2.20
  -8  -1  -5   51.99    2.00
  -5  -8  -1   51.99    1.90
  -5  -8  -1   47.70    1.90
   8   1  -5   51.09    1.90
  -1   5   8   52.49    1.70
   5  -8   1   46.60   10.70
  -1  -5  -8   49.20    2.10
  -8   1   5   49.60    2.10
   1   5  -8   49.60    1.80
   1   5  -8   49.50    3.20
   1   5  -8   49.80    2.00
  -1  -5  -8   50.79    1.90
   5  -8   1   49.80    1.80
  -5   8   1   54.49    2.30
   8  -1   5   50.29    1.90
   8   1  -5   46.50   10.60
   5  -8  -1   53.29    1.50
   5  -8  -1   50.89    2.10
  -8  -1   5   48.90    2.10
  -1   5  -8   52.39    1.90
  -1   5  -8   54.99    3.30
  -8  -1   5   49.30    1.90
  -1   5  -8   52.29    2.00
   5  -8  -1   50.89    1.80
   8  -1  -5   47.80    2.00
   1   5   8   53.09    1.80
  -8   1  -5   46.70    3.40
  -8   1  -5   54.69    2.20
   8  -1  -5   49.80    8.90
  -5   8  -1   48.90    3.50
  -5   8  -1   65.19   12.10
  -1   5  -8   52.89    2.00
   8   1   5   51.59    2.00
   1  -5  -8   47.40    1.80
   1  -5  -8   52.79    1.90
   1  -5  -8   53.49    2.10
   1  -5  -8   51.69    2.10
   5  -8  -1   48.20   10.40
   8  -1  -5   52.59    2.00
  -8  -1   5   37.30   12.20
  -1   5  -8   52.39    1.90
   1   5   8   53.29    6.10
  -2  -5  -8  315.57    9.20
  -8  -2  -5  329.87    9.20
  -8  -2  -5  316.07    9.10
  -8  -2  -5  330.77    9.10
  -2   5   8  332.97    8.90
  -5  -8  -2  358.86    9.30
   2   5  -8  320.77   10.00
   2   5  -8  305.77    9.10
   2   5  -8  321.97    9.10
   8  -2   5  313.87    9.00
   8   2  -5  320.17   19.70
  -8   2   5  320.47    8.90
   8   2  -5  331.37    9.10
  -5  -8  -2  332.17    9.10
  -8   2   5  307.27    9.20
  -2  -5  -8  308.27    9.00
   2   5  -8  333.67    9.10
  -8   2   5  322.17    9.40
  -5  -8  -2  309.97    9.10
   5  -8   2  364.56   19.20
   5  -8   2  326.17    9.20
  -5  -8  -2  323.87    9.20
  -2  -5  -8  329.07    9.10
  -5   8   2  310.27    9.90
  -5   8  -2  304.17   10.20
  -5   8  -2  313.57    9.40
  -8   2  -5  343.57    9.40
   5  -8  -2  327.97    9.20
  -5   8  -2  325.27   17.80
  -2   5  -8  309.57    9.10
  -2   5  -8  316.47    9.90
   2  -5  -8  311.47    9.20
  -2   5  -8  324.67    9.00
   2  -5  -8  321.97    9.10
   2  -5  -8  319.27    9.00
  -8  -2   5  325.27    9.30
  -8  -2   5  319.77    9.00
   8  -2  -5  330.67    9.20
   2   5   8  329.47    9.10
   5  -8  -2  333.87    9.00
   8   2   5  318.07   13.00
  -2   5  -8  320.77    9.20
  -8   2  -5  309.27   10.10
  -2   5  -8  334.27    9.20
   2  -5  -8  337.27    9.20
   8  -3   5  963.90   26.60
   5  -8   3  910.41   34.90
   3   5  -8 1022.90   26.70
   3   5  -8  963.00   27.50
  -8   3   5  938.01   26.90
  -5  -8  -3  968.70   26.80
  -8  -3  -5  952.10   26.80
  -3  -5  -8  997.30   26.70
  -5  -8  -3  984.60   26.70
  -8  -3  -5 1036.20   26.70
   8  -3   5  971.40   27.00
   3   5  -8 1038.80   26.70
  -5   8   3  903.81   27.20
  -3  -5  -8  955.00   26.60
  -8  -3  -5 1035.50   26.80
  -3  -5  -8  933.01   26.60
  -3  -5  -8  980.60   26.70
  -8   3   5  979.70   26.50
   8   3  -5 1036.10   26.70
  -5  -8  -3 1053.39   26.70
  -3   5   8 1018.80   26.40
   5  -8   3  983.20   26.70
  -8   3   5  964.70   26.90
  -8  -3  -5  986.40   26.70
  -5  -8  -3 1052.49   26.80
   8   3  -5  954.80   34.80
   3   5  -8  920.71   26.70
   8   3   5  918.41   32.10
   3  -5  -8  974.40   26.80
  -3   5  -8  913.11   27.30
  -3   5  -8 1004.80   26.70
   8  -3  -5 1022.20   26.80
  -8   3  -5  945.91   27.60
   3  -5  -8  987.60   26.60
   3  -5  -8 1032.40   26.70
  -8  -3   5  992.60   26.60
   5  -8  -3  943.41   26.80
  -5   8  -3  925.11   35.80
  -5   8  -3  830.22   27.60
  -3   5  -8  983.40   26.60
  -8  -3   5  972.20   26.90
   5  -8  -3 1020.00   26.70
  -5   8  -3  937.81   27.00
   3  -5  -8  984.10   26.80
   3   5   8 1011.90   26.70
   5  -8  -3  980.00   26.80
  -8   3  -5 1035.80   27.10
   4   5  -8    6.50    0.80
  -8  -4  -5    6.80    0.80
  -8  -4  -5    6.50    0.80
  -8   4   5    6.30    1.10
  -8   4   5    6.70    0.50
  -8   4   5    9.50    1.50
  -5  -8  -4    6.70    0.70
  -5  -8  -4    5.20    0.80
  -5  -8  -4    7.40    0.70
   4   5  -8    6.50    0.60
   5  -8   4    5.20    0.90
  -4  -5  -8    9.40    0.90
  -4  -5  -8    6.90    0.80
   4   5  -8    7.00    0.70
   4   5  -8    8.10    1.90
  -4  -5  -8    7.90    0.90
  -5  -8  -4    8.20    0.80
   4   5  -8   10.90    1.50
  -5   8   4    8.20    1.60
  -8  -4  -5    6.50    0.70
   8  -4   5    6.60    0.70
   8  -4   5    8.30    0.80
   8   4  -5   12.60   13.00
  -8  -4  -5   10.10    1.00
  -4  -5  -8    8.10    0.80
  -8  -4   5    7.10    0.70
   4  -5  -8    7.90    1.10
  -4   5  -8    7.00    1.70
  -8  -4   5    7.00    0.90
   4   5   8    6.40    0.70
  -4   5  -8    6.90    0.60
  -8   4  -5    4.90    1.10
   4  -5  -8    5.60    0.70
   8  -4  -5    6.10    0.70
   8  -4  -5    5.40    1.00
  -4   5  -8    6.40    0.80
  -5   8  -4    6.80    1.40
  -8   4  -5    3.30    1.80
   4  -5  -8    8.50    0.90
   5  -8  -4    7.90    0.70
   5  -8  -4    7.60    0.90
   5  -8  -4    7.50    1.00
   4  -5  -8    6.40    0.60
  -8  -5  -5  202.28    5.90
   5   8  -5  196.78    6.80
  -8  -5  -5  213.48    6.00
  -5   8   5  198.68    6.50
   5   5  -8  193.68    5.80
  -8  -5  -5  195.48    5.90
  -8   5   5  198.78    6.30
   5  -8   5  199.48    5.90
   8  -5   5  191.38    5.80
   8   5  -5  203.88    5.70
   8   5  -5  199.68    5.70
  -5  -5  -8  205.78    5.90
   5   5  -8  211.78    5.80
   5   5  -8  203.68    7.10
  -5  -8  -5  208.08    5.90
  -5  -8  -5  201.18    5.90
  -5  -5  -8  187.58    5.70
  -5  -5  -8  206.68    5.90
  -8  -5  -5  195.38    6.00
  -5   5   8  202.18    6.10
   5   5  -8  199.88    5.80
  -5  -8  -5  198.88    5.90
  -5  -8  -5  209.38    6.00
   8  -5   5  206.28    6.00
  -5  -5  -8  202.88    5.90
   5  -5  -8  203.88    5.90
   5  -5  -8  198.98    5.80
  -5   5  -8  200.88    6.80
   8  -5  -5  211.18    6.00
  -5   5  -8  195.38    5.90
   8  -5  -5  205.48    5.80
  -5   8  -5  207.68    6.50
  -8   5  -5  206.08    6.60
   5  -5  -8  203.38    6.10
   5  -5  -8  207.88    6.00
  -8  -5   5  204.18    6.10
  -8  -5   5  208.28    5.90
  -8   5  -5  195.88    6.00
   5  -8  -5  187.28    6.00
   8  -5  -5  191.58    5.80
   5  -8  -5  204.08    5.80
   5  -8  -5  193.08    6.00
  -5  -5   8  197.18    5.80
  -6  -5  -8   21.40    1.30
  -6  -5  -8   25.40    1.40
  -5  -8  -6   25.40    1.50
   8  -6   5   25.60    1.50
  -6  -5  -8   24.50    1.10
  -8  -6  -5   24.10    1.60
  -6  -5  -8   24.20    1.10
  -8  -6  -5   25.40    1.50
  -6   5   8   23.30    1.80
  -5  -8  -6   24.90    1.40
  -5  -8  -6   24.80    1.30
  -8   6   5   30.80    2.10
  -8  -6  -5   26.00    1.40
   8   6  -5   26.60    1.20
  -6  -5  -8   25.20    1.50
   6   5  -8   24.70    1.20
   6   5  -8   22.70    2.40
   5   8  -6   27.10    2.40
   6   5  -8   25.40    1.20
  -8  -6  -5   26.70    1.40
   8  -6   5   26.90    1.40
   8   6  -5   24.40    1.20
  -5  -8  -6   28.20    1.50
  -5   8   6   27.30    2.60
  -6  -5  -8   24.00    1.40
  -5  -8  -6   27.90    1.40
   6   5  -8   24.80    1.50
   8   6  -5   30.80    3.10
   5  -8  -6   26.50    1.40
   5  -8  -6   24.80    1.30
   8  -6  -5   25.60    1.30
  -5   8  -6   27.70    2.50
   8  -6  -5   27.00    1.60
  -8   6  -5   25.70    2.70
  -6  -5   8   26.30    1.40
  -8  -6   5   23.40    1.70
  -8  -6   5   26.00    1.40
  -5   8  -6   24.10    1.70
  -6   5  -8   26.60    1.50
   8  -6  -5   26.30    1.30
  -8   6  -5   27.10    2.50
  -8   6  -5   26.60    2.50
  -6   5  -8   30.10    2.50
   6  -5  -8   26.70    1.70
   5  -8  -6   27.80    1.60
   6  -5  -8   24.00    1.30
   6  -5  -8   25.30    1.60
   5  -8  -6   26.10    1.70
   6  -5  -8   26.30    1.40
  -5  -8  -7    4.60    0.90
   7  -5   8    4.00    0.80
  -8  -7  -5    3.80    0.70
   8   7  -5    2.60    2.20
   7   5  -8    4.30    0.60
  -5   8   7    3.20    1.50
  -7  -5  -8    4.00    0.80
  -7  -5  -8    4.80    0.80
  -7   5   8    4.60    1.10
  -5  -8  -7    4.20    0.70
   8  -7   5    4.50    0.80
  -8  -7  -5    5.30    0.90
  -8  -7  -5    4.20    0.70
   5   8  -7    4.40    1.10
  -7  -5  -8    4.50    0.80
  -7  -5  -8    5.80    0.60
   8  -7   5    4.80    0.90
   7   5  -8    5.00    0.60
   7   5  -8    4.20    0.80
  -8   7   5    4.20    1.30
  -7  -5  -8    4.50    0.60
  -7  -5  -8    4.90    0.70
   5   8  -7    4.70    2.00
  -5  -8  -7    4.30    0.70
  -5  -8  -7    5.10    0.80
   7  -5  -8    5.10    1.00
   7  -5  -8    3.60    0.80
   7  -5  -8    5.00    0.80
  -7   5  -8    5.40    0.90
  -7  -5   8    3.70    0.70
  -5   8  -7    4.60    0.90
   7  -5  -8    5.30    0.70
   5  -8  -7    5.40    0.70
   5  -8  -7    5.50    0.80
  -8   7  -5    5.10    1.50
  -7   5  -8    3.80    1.40
  -8  -7   5    5.50    1.00
   8  -7  -5    4.00    0.80
  -7   5  -8    3.30    1.80
   5  -8  -7    3.50    0.80
   8  -7  -5    4.40    0.70
  -8  -7   5    4.00    0.70
  -5   8  -7    2.70    1.50
  -8   7  -5    3.40    1.70
  -8  -7   5    5.70    0.70
   8  -7  -5    7.00    0.70
   5  -8  -7    2.70    0.80
   0   6  -8 2247.58   61.49
  -6  -8   0 2205.88   60.79
  -6   8   0 2173.28   69.89
   0  -6  -8 2222.18   60.89
   0   6  -8 2277.87   60.89
  -6   8   0 2280.37   61.09
  -8   0   6 2301.97   61.09
  -6  -8   0 2261.47   60.89
   0  -6  -8 2297.47   60.99
   0  -6  -8 2290.17   60.79
   0  -6  -8 2259.57   60.89
   0   6  -8 2244.88   60.89
  -8   0   6 2134.99   60.79
   6  -8   0 2202.98   60.69
   6  -8   0 2332.37   60.99
   8   0  -6 2260.97   60.89
   8   0  -6 2243.78   60.89
   8   0   6 2393.76   60.99
   8   0   6 2229.78   60.79
   6  -8   0 2098.69   68.59
   0   6  -8 2285.97   60.89
  -6   8   0 2138.79   61.59
  -8   0  -6 2293.67   60.99
  -8  -1  -6  102.89    3.40
  -8  -1  -6   98.69    3.30
   8  -1   6   96.39    3.20
   6  -8   1  102.19    3.40
   1   6  -8  106.79    3.30
  -8  -1  -6  100.79    3.20
   6  -8   1  105.79    3.10
  -8   1   6  105.49    3.50
  -6  -8  -1  107.69    3.30
   1   6  -8  102.59    3.30
  -6   8   1  106.09    4.40
  -6   8   1  109.39    3.60
  -1  -6  -8  104.79   12.70
  -1  -6  -8  102.79    3.20
  -6  -8  -1  100.29    3.20
   8  -1   6  111.89    3.40
   6  -8   1  126.99   15.80
   8   1  -6  100.19    3.30
   6  -8   1   98.89    3.10
  -1  -6  -8   99.39    3.40
   8   1  -6   98.19    3.30
   1   6  -8   93.19    4.30
  -1  -6  -8  104.89    3.30
   1   6  -8  106.89    3.30
   1  -6  -8  105.79    3.40
  -6   8  -1  106.89    3.70
  -8  -1   6   98.49    3.20
  -8  -1   6  104.49    3.50
   1  -6  -8  102.79    3.30
   6  -8  -1  100.19    3.10
   6  -8  -1  103.19    3.40
  -8   1  -6   89.99    4.70
  -8   1  -6  109.29    3.60
  -6  -8   1  103.29    3.20
   1  -6  -8   98.39    3.40
  -6   8  -1   99.69    4.60
  -1   6  -8  105.09    3.30
  -1   6  -8  104.69    4.40
  -1   6  -8   97.59    3.30
   1   6   8  110.79    8.20
   6  -8  -1  103.99    2.90
   8   1   6  107.89    3.40
  -1   6  -8  101.79    3.30
  -6  -8   1  104.79    3.30
   1  -6  -8  100.19    3.20
   8  -1  -6  100.49    3.30
  -6   8  -1  116.89   14.80
   8  -1  -6  100.69    3.20
   8  -2   6   50.99    2.00
   8  -2   6   48.70    1.90
  -2  -6  -8   47.10    1.80
   6  -8   2   49.10    2.00
   8   2  -6   49.50    1.90
  -6  -8  -2   48.90    2.10
  -2  -6  -8   50.89    1.90
   2   6  -8   52.09    2.00
   6  -8   2   64.19   12.30
  -2  -6  -8   51.29    2.10
  -6   8   2   47.50    3.20
  -6  -8  -2   55.29    2.00
  -6  -8  -2   48.50    1.90
  -8  -2  -6   51.39    2.00
   8   2  -6   55.99   12.20
  -8  -2  -6   43.90    1.90
  -8   2   6   51.39    2.30
  -6  -8  -2   47.20    2.00
   2   6  -8   49.90    1.90
   2   6  -8   50.79    3.30
  -2  -6  -8   43.30    4.40
   2   6  -8   49.10    1.90
  -2  -6  -8   41.40    1.80
  -8  -2  -6   50.79    1.90
  -6   8  -2   56.29   11.10
  -8   2  -6   48.40    3.60
  -2   6  -8   52.19    3.20
  -8  -2   6   51.99    2.20
  -8  -2   6   49.00    1.90
   2  -6  -8   48.60    1.80
  -6  -8   2   49.90    2.00
   2   6   8   47.20    5.60
   6  -8  -2   48.30    1.80
   2  -6  -8   47.60    2.10
  -2   6  -8   49.00    1.80
   8   2   6   51.19    2.00
  -6  -8   2   50.79    1.90
   2  -6  -8   49.40    2.10
  -2   6  -8   46.80    2.00
   8   2   6   55.29    6.30
   8  -2  -6   52.99    1.90
   8  -2  -6   51.59    2.00
  -6   8  -2   48.90    3.50
  -8   2  -6   56.99    2.40
   2  -6  -8   49.50    1.90
   6  -8  -2   48.30    2.20
  -6   8  -2   56.89    2.50
  -6  -8  -3 1400.86   35.70
   8  -3   6 1265.27   35.50
  -8   3   6 1340.17   35.90
  -8   3   6 1287.97   35.40
  -6  -8  -3 1217.38   35.70
  -6  -8  -3 1404.96   35.80
   3   6  -8 1299.77   35.60
   3   6  -8 1384.86   35.60
  -8  -3  -6 1295.07   35.60
  -6   8   3 1266.67   36.10
  -3  -6  -8 1268.87   35.50
  -8  -3  -6 1361.36   35.70
   3   6  -8 1366.86   35.60
   3   6  -8 1310.37   36.40
   6  -8   3 1291.07   35.60
  -6  -8  -3 1295.27   35.60
   8   3  -6 1319.77   35.60
  -3  -6  -8 1287.67   35.50
  -8  -3  -6 1348.77   35.60
  -3  -6  -8 1270.77   35.60
  -3  -6  -8 1383.56   35.70
   8  -3   6 1385.96   35.70
  -3   6  -8 1304.97   35.50
  -8  -3   6 1295.07   35.80
   8  -3  -6 1316.57   35.60
   3  -6  -8 1292.37   35.50
   3  -6  -8 1358.16   35.60
  -6   8  -3 1151.98   36.50
  -8   3  -6 1167.68   36.50
   3  -6  -8 1279.07   35.70
   6  -8  -3 1293.07   35.70
  -3   6  -8 1303.47   35.70
   8   3   6 1214.28   37.10
   6  -8  -3 1330.17   35.80
   6  -8  -3 1346.77   35.50
  -6   8  -3 1317.67   35.90
  -8   3  -6 1407.46   36.00
  -3   6  -8 1260.17   36.20
  -6  -8   3 1353.86   35.60
  -8  -3   6 1280.87   35.50
   3  -6  -8 1310.87   35.70
  -8   4   6    4.40    1.00
  -4  -6  -8    5.00    0.80
  -6  -8  -4    4.30    0.70
   8   4  -6    5.60    0.80
  -6  -8  -4    5.30    0.80
  -8  -4  -6    5.70    0.80
  -4  -6  -8    4.40    0.70
  -8  -4  -6    4.80    0.80
   4   6  -8    3.50    0.60
  -8   4   6    4.90    0.40
   4   6  -8    3.70    0.80
  -8  -4  -6    4.80    0.70
   4   6  -8    4.90    0.60
  -6  -8  -4    6.10    0.90
  -6  -8  -4    6.00    0.80
   4   6  -8    3.70    1.80
   6  -8   4    5.30    0.80
   6   8  -4    0.60   13.50
  -6   8   4    6.20    1.50
  -4  -6  -8    4.70    0.70
  -4  -6  -8    3.40    0.60
   6   8  -4    5.90    2.50
   8  -4   6    4.30    0.70
   4   6  -8    3.90    0.80
   8  -4   6    5.70    0.80
   4  -6  -8    5.30    0.70
   6  -8  -4    5.50    0.70
  -4   6  -8    4.00    1.50
  -8   4  -6    3.50    1.80
  -8   4  -6    5.50    0.90
   6  -8  -4    4.70    0.90
  -6  -8   4    4.40    0.70
  -6   8  -4    5.30    1.90
   8  -4  -6    5.30    0.80
   4  -6  -8    6.00    0.70
   8  -4  -6    5.40    0.70
  -8   4  -6    5.50    1.30
   6  -8  -4    5.20    1.00
   8  -4  -6    4.20    0.80
  -6   8  -4    5.30    1.30
  -8  -4   6    3.30    0.90
  -4   6  -8    5.70    0.90
  -4   6  -8    6.00    0.70
  -8  -4   6    3.60    0.70
   4  -6  -8    5.10    1.00
  -5  -6  -8  217.48    6.50
   8  -5   6  217.18    6.30
   6   8  -5  204.88    7.40
  -6  -8  -5  222.18    6.40
  -5   6   8  217.88    6.70
  -6   8   5  221.78    7.00
   6  -8   5  214.18    6.40
  -8  -5  -6  230.38    6.50
   8   5  -6  228.48    6.20
  -5  -6  -8  224.68    6.40
   5   6  -8  220.68    6.30
   5   6  -8  224.08    7.50
   5   6  -8  214.28    6.40
   8  -5   6  227.28    6.50
  -8   5   6  216.68    6.80
  -6  -8  -5  212.98    6.50
  -5  -6  -8  208.78    6.20
  -8  -5  -6  223.78    6.40
  -8  -5  -6  206.08    6.60
   8   5  -6  225.18    6.20
  -6  -8  -5  227.88    6.50
   5   6  -8  215.98    6.30
  -5  -6  -8  223.28    6.50
   5   6  -8  208.18    6.30
  -8  -5  -6  222.58    6.50
   5  -6  -8  227.38    6.60
  -8  -5   6  222.68    6.40
  -8   5  -6  189.68    7.60
   6  -8  -5  225.08    6.60
   6  -8  -5  227.18    6.40
  -5   6  -8  219.38    7.30
   8  -5  -6  213.98    6.30
  -6   8  -5  222.68    7.00
   6  -8  -5  224.18    6.60
  -8  -5   6  227.28    6.60
   5  -6  -8  221.98    6.60
  -5   6  -8  219.88    6.50
   8  -5  -6  225.88    6.50
  -5  -6   8  215.28    6.30
   5  -6  -8  221.38    6.30
   5  -6  -8  220.68    6.40
  -8   5  -6  218.78    6.50
  -8   5  -6  219.48    7.10
   8  -5  -6  224.78    6.30
   6   6  -8  261.27    7.70
   6   6  -8  265.57    7.60
   6   8  -6  265.77    8.70
   8   6  -6  255.87    8.80
   8   6  -6  268.17    7.50
  -6  -8  -6  250.17    7.80
   6   6  -8  258.87    7.60
  -8  -6  -6  273.07    7.80
  -8  -6  -6  267.67    7.70
  -6  -8  -6  279.77    7.70
  -6  -6  -8  261.87    7.40
  -6  -6  -8  264.77    7.40
   8  -6   6  266.37    7.60
  -6  -8  -6  277.97    7.80
  -6  -8  -6  275.67    7.70
  -6  -6  -8  277.07    7.70
  -6   8   6  264.07    8.20
  -6  -6  -8  273.77    7.70
  -6  -6  -8  272.17    7.70
   6   6  -8  269.07    7.60
   6   6  -8  265.07    8.80
  -8   6   6  263.07    8.10
   8  -6   6  270.97    7.80
  -6  -8  -6  247.58    7.50
   8   6  -6  267.17    7.50
  -8  -6  -6  269.57    7.70
  -6   6   8  259.87    7.90
  -6  -6  -8  255.67    7.50
  -8  -6   6  261.37    7.90
   6  -8  -6  265.77    7.90
   6  -8  -6  268.37    7.90
  -6  -8   6  267.67    7.70
   8  -6  -6  274.77    7.60
   8  -6  -6  282.07    7.80
  -8   6  -6  225.68    9.00
  -8   6  -6  261.17    8.30
  -8  -6   6  273.07    7.60
  -6   8  -6  276.97    8.30
   6  -6  -8  266.57    7.70
   6  -6  -8  274.37    7.90
   6  -6  -8  270.47    7.90
   8  -6  -6  265.47    7.60
  -6  -6   8  268.57    7.60
  -6   6  -8  272.07    7.80
   6  -8  -6  276.77    7.70
   6  -6  -8  278.27    7.60
  -6   6  -8  261.97    8.50
  -8   6  -6  267.67    7.80
  -8   6  -6  255.07    8.50
   6  -8  -6  268.37    7.60
  -8  -7  -6  135.19    4.20
  -8  -7  -6  132.29    4.20
  -7  -6  -8  122.99    4.00
  -8  -7  -6  132.49    4.10
   7   6  -8  132.29    4.00
   7   6  -8  135.89    5.60
   7   6  -8  130.49    4.10
   7   6  -8  135.29    4.00
   8   7  -6  129.59    5.60
  -7  -6  -8  133.19    4.10
  -7  -6  -8  131.89    4.20
  -7  -6  -8  126.69    3.90
  -6  -8  -7  121.99    3.90
  -7  -6  -8  125.99    3.80
  -6  -8  -7  136.59    4.10
  -6  -8  -7  137.09    4.20
  -8   7   6  131.39    4.70
   8  -7   6  130.29    4.20
   7  -6   8  131.09    4.30
   6   8  -7  131.19    5.50
   6   8  -7  129.39    4.30
  -7  -6  -8  133.99    4.20
  -6  -8  -7  129.39    4.20
  -7   6   8  129.89    4.50
   8  -7   6  128.99    4.20
  -6   8   7  123.89    4.70
  -6   8  -7  138.49    4.30
  -7   6  -8  133.09    4.20
  -6  -8   7  137.39    4.10
  -6   8  -7  136.79    5.10
   8  -7  -6  136.79    4.30
  -8   7  -6  138.29    4.90
  -7  -6   8  130.59    4.00
   8  -7  -6  138.59    4.10
   6  -8  -7  133.09    4.30
   8  -7  -6  128.99    4.30
   7  -6  -8  130.69    4.00
  -8  -7   6  129.59    4.10
   6  -8  -7  133.39    4.10
   6  -8  -7  135.09    4.40
  -8  -7   6  133.59    4.30
  -7   6  -8  133.59    5.20
   7  -6  -8  132.19    4.10
   6  -8  -7  133.69    4.00
   7  -6  -8  136.99    4.40
   8  -7  -6  136.59    4.00
   7  -6  -8  132.59    4.30
   0  -7  -8   -0.10    0.50
   7  -8   0   -0.40    0.40
   8   0   7   -0.50    0.60
  -8   0  -7   -0.20    2.10
  -7  -8   0    0.60    0.60
  -8   0  -7   -0.30    0.70
   8   0   7   -0.20    0.60
   0  -7  -8    0.30    0.80
   0   7  -8   -2.20    1.60
   0   7  -8   -0.30    0.70
  -8   0   7    0.70    0.70
  -7  -8   0   -0.30    0.60
  -8   0  -7   -0.90    0.70
  -7   8   0    3.20    1.80
  -7   8   0   -1.00    1.00
   0  -7  -8    0.10    0.60
   8   0  -7   -0.20    0.60
   8   0  -7    0.40    0.60
   7  -8   0    0.10    0.80
   0  -7  -8    0.30    0.70
   7  -8   1  619.34   16.90
  -7  -8  -1  593.34   16.90
  -8  -1  -7  611.84   16.70
  -7   8   1  611.74   17.60
  -8   1   7  636.84   17.10
   8  -1   7  607.54   17.00
   8  -1   7  588.04   16.70
   8   1  -7  609.04   16.90
   8   1  -7  613.04   16.80
  -7  -8  -1  602.24   16.80
  -1  -7  -8  569.64   16.60
  -8  -1  -7  575.44   16.70
   7  -8   1  657.33   16.70
   1   7  -8  606.44   16.90
  -8  -1  -7  643.74   17.00
  -7  -8  -1  647.44   16.90
   7  -8   1  562.54   28.00
  -7   8   1  614.94   17.00
  -1  -7  -8  591.54   16.70
  -1  -7  -8  628.04   16.90
   1   7  -8  582.74   17.60
  -1  -7  -8  595.64   16.90
  -1   7  -8  596.14   17.60
   8  -1  -7  633.74   16.80
   1  -7  -8  594.34   16.70
   1  -7  -8  602.44   16.80
  -8  -1   7  605.14   17.00
  -8  -1   7  586.44   16.70
   8  -1  -7  616.34   16.80
  -1   7  -8  618.44   16.90
   7  -8  -1  614.94   16.60
   8   1   7  641.54   17.00
  -7  -8   1  599.74   16.70
  -7   8  -1  571.24   29.70
  -7   8  -1  570.84   17.70
  -7  -8   1  623.34   16.80
   7  -8  -1  619.64   16.90
   1  -7  -8  620.04   17.00
   1  -7  -8  599.94   16.90
  -8   1  -7  626.94   17.10
  -7   8  -1  598.14   17.00
   2   7  -8    6.50    0.80
  -2  -7  -8    6.30    0.80
   2   7  -8    8.00    1.80
  -7  -8  -2    6.50    0.80
   2   7  -8    6.00    0.70
  -8  -2  -7    5.30    0.70
   8   2  -7   32.70   15.60
   8   2  -7    4.20    0.80
  -7   8   2    5.50    1.60
  -2  -7  -8    3.80    0.60
  -8  -2  -7    4.20    0.80
  -2  -7  -8    5.50    0.70
  -8  -2  -7    6.20    0.80
   7  -8   2    6.50    0.80
   7  -8   2    5.60    0.90
  -8   2   7    4.90    1.00
   2   7  -8    5.40    0.90
   8  -2   7    5.90    0.90
   8  -2   7    5.80    0.80
  -2  -7  -8    6.60    1.00
  -7  -8  -2    6.70    0.80
  -7  -8  -2    6.10    0.90
   8   2   7    4.90    0.80
  -8   2  -7    6.00    1.20
   8  -2  -7    6.90    1.00
  -8   2  -7    5.70    0.90
   7  -8  -2    7.00    0.70
  -7  -8   2    6.20    0.80
   2  -7  -8    6.70    0.70
  -8  -2   7    7.70    0.80
  -8   2  -7    6.10    2.00
  -2   7  -8    5.20    0.80
  -8  -2   7    6.60    1.00
   2  -7  -8    6.20    0.80
   2  -7  -8    5.00    0.90
  -7   8  -2    6.10    1.90
  -7   8  -2    6.00    1.20
   8  -2  -7    6.70    0.70
  -7  -8   2    4.30    1.10
  -7  -8   2    6.20    0.70
   7  -8  -2    7.20    0.90
   7  -8  -2    6.10    1.00
  -2   7  -8    2.60    1.50
  -8  -3  -7    6.30    0.80
  -8  -3  -7    4.70    0.80
  -8  -3  -7    5.30    0.80
   8   3  -7    5.80    0.80
  -7  -8  -3    6.90    0.90
  -7  -8  -3    4.30    0.80
  -7  -8  -3    4.80    0.70
  -3  -7  -8    7.00    0.70
  -8   3   7    5.00    1.00
  -8   3   7    5.90    0.60
   7  -8   3    3.70    0.90
   3   7  -8    7.10    0.90
   3   7  -8    4.20    0.70
  -7  -8  -3    4.60    0.70
  -3  -7  -8    4.00    0.70
   3   7  -8    3.20    1.60
   3   7  -8    5.80    0.70
   8  -3   7    6.50    0.80
   8  -3   7    8.20    0.90
  -3  -7  -8    5.70    0.90
   7  -8   3    5.70    0.70
  -7   8   3    5.80    1.50
  -3  -7  -8    5.10    0.60
   3  -7  -8    6.70    0.80
   3  -7  -8    8.40    1.10
   3  -7  -8    5.20    0.90
  -8  -3   7    5.90    0.80
   8  -3  -7    6.40    0.70
   3  -7  -8    5.20    0.60
  -8   3  -7    6.30    1.20
  -8  -3   7    5.70    1.00
  -3   7  -8    9.90    1.80
  -3   7  -8    5.80    0.90
   7  -8  -3    6.40    0.70
   7  -8  -3    6.20    0.90
   7  -8  -3    6.60    1.00
   8   3   7    6.80    0.90
  -3   7  -8    7.50    0.70
  -7   8  -3    4.80    1.80
   8  -3  -7    5.50    0.70
   8  -3  -7    5.40    0.80
  -7  -8   3    5.30    0.70
  -8   3  -7    6.00    0.90
  -7  -8   3    5.00    1.00
  -7  -8   3    6.10    0.80
  -8   3  -7    5.80    2.10
  -7   8  -3    3.80    1.10
   8   4  -7    2.20    0.70
   8  -4   7    2.60    0.70
  -4   7   8    2.40    1.50
   7   8  -4    4.10    2.20
   4   7  -8    2.10    0.60
   4   7  -8    2.50    0.60
   7  -8   4    0.70    0.80
  -7  -8  -4    2.10    0.60
  -4  -7  -8    1.60    0.60
  -4  -7  -8    3.80    0.80
  -4  -7  -8    3.50    0.70
  -4  -7  -8    2.50    0.70
  -7  -8  -4    2.20    0.60
   4   7  -8    2.00    1.80
  -8   4   7    4.30    1.10
  -8  -4  -7    3.10    0.80
  -8  -4  -7    2.10    0.70
  -7  -8  -4    1.80    0.80
  -7  -8  -4    2.70    0.80
  -7   8   4    3.20    1.40
   4   7  -8    1.70    0.80
   4  -7  -8    4.10    0.90
   8  -4  -7    2.70    0.80
   8  -4  -7    2.80    0.70
   8  -4  -7    2.50    0.60
  -4   7  -8    0.90    1.40
   7  -8  -4    2.40    0.60
  -7  -8   4    2.50    0.70
  -8  -4   7    2.20    0.70
  -4   7  -8    2.20    0.80
   7  -8  -4    1.60    0.80
   4  -7  -8    2.00    0.60
  -7  -8   4    1.30    0.70
  -7   8  -4    0.30    1.80
  -7   8  -4    3.80    1.30
   7  -8  -4    3.10    0.90
  -8   4  -7    1.10    0.80
   4  -7  -8    2.60    0.70
   4  -7  -8    2.50    0.90
  -8  -4   7    2.10    0.90
  -8   4  -7    0.30    1.20
  -7  -8  -5   73.49    3.30
  -7  -8  -5   60.49    2.20
  -8   5   7   59.49    2.70
   8   5  -7   58.69    2.00
   7  -8   5   55.69    2.30
  -8  -5  -7   60.69    2.30
   5   7  -8   57.99    2.10
   5   7  -8   58.99    3.80
   5   7  -8   64.29    2.40
   5   7  -8   57.69    2.20
   8   5  -7   59.09    2.00
  -7  -8  -5   55.39    2.20
  -7  -8  -5   58.79    2.40
  -5   7   8   56.89    2.90
   7  -8   5   56.59    2.20
   7   8  -5   54.09    4.00
  -5  -7  -8   57.79    2.10
  -5  -7  -8   59.49    2.30
  -5  -7  -8   58.59    2.20
  -5  -7  -8   58.49    2.30
  -7   8   5   62.89    3.10
  -8  -5  -7   58.79    2.20
  -8  -5  -7   58.49    2.30
   8  -5   7   59.59    2.40
   5  -7  -8   61.09    2.10
   5  -7  -8   59.19    2.20
   5  -7  -8   62.29    2.50
   5  -7  -8   61.19    2.50
  -8   5  -7   60.49    3.20
  -5   7  -8   58.99    2.40
  -7   8  -5   55.19    3.00
  -5   7  -8   55.19    3.90
  -8   5  -7   61.89    3.60
   8  -5  -7   58.19    2.10
  -8   5  -7   59.79    2.40
   8  -5  -7   55.29    2.30
   7  -8  -5   60.89    2.50
  -7  -8   5   58.89    2.20
  -7  -8   5   57.59    2.10
  -8  -5   7   59.59    2.50
  -8  -5   7   56.49    2.20
   8  -5  -7   61.09    2.20
   7  -8  -5   60.99    2.20
   7  -8  -5   59.59    2.40
   6   7  -8  155.58    4.60
   6   7  -8  151.08    6.10
  -6  -7  -8  155.78    4.80
   6   7  -8  152.18    4.70
  -7  -8  -6  159.78    4.70
  -8   6   7  158.08    5.20
  -7  -8  -6  139.99    4.50
  -6  -7  -8  161.68    4.80
   7  -8   6  148.29    4.80
   7  -8   6  154.88    5.20
   7   8  -6  159.58    6.10
  -8  -6  -7  156.28    4.70
  -6   7   8  151.48    5.20
  -7  -8  -6  160.08    4.80
   8  -6   7  155.48    4.90
   8   6  -7  151.68    4.50
   8   6  -7  151.68    4.70
   8   6  -7  160.38    4.60
   6   7  -8  150.38    4.80
  -7   8   6  151.28    5.40
  -6  -7  -8  147.89    4.60
  -8  -6  -7  162.78    4.80
  -8  -6  -7  158.98    4.80
  -7  -8  -6  156.18    4.90
   8  -6  -7  156.88    4.70
   8  -6  -7  152.88    4.90
   6  -7  -8  158.58    4.70
   7  -8  -6  158.18    4.70
   6  -7  -8  159.38    5.00
   7  -8  -6  156.18    4.90
  -6  -7   8  154.68    4.70
  -6   7  -8  153.28    5.70
  -6   7  -8  156.58    4.90
   7  -8  -6  159.58    4.60
   6  -7  -8  161.88    4.60
  -7  -8   6  158.98    4.70
  -7  -8   6  145.89    4.60
  -7   8  -6  151.68    5.50
   7  -8  -6  154.08    5.00
   6  -7  -8  151.28    4.90
   8  -6  -7  159.88    4.60
  -8  -6   7  158.78    5.00
  -8  -6   7  155.78    4.70
  -8   6  -7  154.28    5.60
  -8   6  -7  148.99    4.80
  -8   6  -7  152.28    5.60
  -8  -7  -7   22.80    1.60
  -8  -7  -7   21.80    1.40
  -8  -7  -7   22.80    1.40
  -7  -7  -8   23.80    1.60
   8  -7   7   24.70    1.70
   8   7  -7   24.20    1.30
   8   7  -7   23.10    2.70
  -8   7   7   21.60    2.20
  -7  -8  -7   22.70    1.40
  -7  -8  -7   23.20    1.60
  -7  -8  -7   23.90    1.40
  -7  -8  -7   23.20    1.50
   7   7  -8   22.10    1.30
   7   7  -8   21.90    2.50
  -7  -7  -8   20.50    1.30
   8   7  -7   22.50    1.30
  -7  -7  -8   23.50    1.50
  -7  -7  -8   23.60    1.50
  -7   8   7   24.30    2.40
   7   8  -7   21.10    2.50
   7   7  -8   24.00    1.30
  -7   7   8   22.50    2.20
   7  -7   8   21.40    1.60
  -8  -7   7   26.50    2.30
  -7  -7   8   23.10    1.50
  -7   7  -8   22.90    2.20
   7  -8  -7   21.40    1.40
   7  -8  -7   22.80    1.70
   7  -8  -7   22.50    1.70
   7  -7  -8   22.90    1.30
   7  -7  -8   24.00    1.40
   7  -7  -8   24.30    1.80
   7  -7  -8   24.50    1.70
  -7   8  -7   19.90    2.00
  -7  -8   7   23.30    1.40
  -7  -8   7   22.40    1.50
  -7   7  -8   23.40    1.60
   7  -8  -7   23.20    1.30
   8  -7  -7   23.00    1.30
   8  -7  -7   25.00    1.40
   8  -7  -7   22.30    1.70
   8  -7  -7   20.90    1.70
  -8  -7   7   24.10    1.40
  -8   7  -7   25.60    2.30
  -8   7  -7   24.20    1.60
  -7   8  -7   23.50    1.70
  -8  -8   0  510.25   13.80
  -8  -8   0  498.75   13.70
  -8   0  -8  468.05   13.70
  -8   0  -8  458.15   13.70
  -8   0   8  502.95   14.00
  -8   8   0  492.05   14.70
  -8   8   0  489.65   14.00
   0  -8  -8  507.95   13.70
   0  -8  -8  513.25   13.80
   0  -8  -8  440.16   13.90
   0  -8  -8  515.15   14.00
   0  -8  -8  506.65   13.90
   0   8  -8  496.45   14.60
   0   8  -8  484.85   13.80
   8  -8   0  511.25   13.50
   8  -8   0  489.45   13.80
   8   0  -8  513.95   13.80
   8   0   8  502.85   13.90
   8   0   8  483.35   13.60
  -8  -8  -1    4.30    0.80
  -8  -8  -1    3.80    0.70
   8  -8   1    4.30    0.60
   8  -8   1    2.70    0.80
  -1  -8  -8    3.80    0.80
  -8  -1  -8    3.70    0.80
  -8  -1  -8    4.20    0.80
  -8  -1  -8    3.20    1.00
  -8  -1  -8    2.10    0.70
   8   1  -8    3.90    0.80
   8   1  -8    2.60    0.70
   1   8  -8    3.30    1.60
  -8   1   8    3.00    1.00
   8  -1   8    3.90    0.80
   8  -1   8    4.90    1.10
  -8   8   1    2.50    1.60
  -8   8   1    6.50    1.10
  -1  -8  -8    4.20    0.70
  -1  -8  -8    5.70    0.80
  -1  -8  -8    4.50    0.80
   1   8  -8    4.40    0.90
  -8   1  -8    5.80    0.90
  -1   8  -8    3.70    0.80
   1  -8  -8    4.40    0.70
   1  -8  -8    4.20    0.80
   1  -8  -8    4.00    1.00
   1  -8  -8    4.40    0.90
  -8   1  -8    4.90    1.40
  -8  -8   1    3.00    0.70
   8  -8  -1    4.80    1.00
   8  -8  -1    2.80    0.80
  -8  -8   1    4.10    1.20
  -8  -8   1    4.30    0.70
   8  -1  -8    3.80    0.70
   8  -1  -8    4.00    0.80
  -8   8  -1    1.50    1.70
  -8   8  -1    3.30    1.00
  -1   8  -8    2.50    1.50
  -8  -1   8    3.50    1.00
   8   1   8    3.40    0.90
  -8  -8  -2   10.00    0.90
  -8  -8  -2   10.40    0.90
   8  -8   2    7.80    1.00
  -2  -8  -8    7.70    0.90
   2   8  -8    8.80    1.80
  -8  -2  -8    9.50    1.00
  -8  -2  -8    9.50    0.90
  -8  -2  -8    7.50    0.90
   8   2  -8    8.60    0.90
   8   2  -8    7.20    0.90
  -2  -8  -8    9.20    0.80
  -8   2   8    9.40    1.10
  -2  -8  -8    7.80    0.70
   8  -2   8    9.20    1.00
  -8   8   2    5.70    1.60
  -8   8   2    7.60    1.00
   8  -8   2    8.60    0.90
  -2  -8  -8   11.00    1.00
   2   8  -8    8.70    1.00
  -8   8  -2    5.60    1.80
  -8   2  -8    7.90    0.90
  -8   2  -8    7.20    1.20
   2  -8  -8    9.10    1.00
   2  -8  -8    9.60    0.90
   2  -8  -8    8.70    1.10
   2  -8  -8    6.90    1.00
  -8  -8   2   10.20    0.90
  -2   8  -8    6.70    0.90
   8  -8  -2    9.90    0.80
   8  -8  -2    9.20    1.10
  -8  -8   2    9.20    0.90
  -8  -8   2   11.00    1.20
   8  -2  -8    9.50    0.80
   8  -2  -8    8.50    0.80
   8  -2  -8   11.70    1.30
  -8   8  -2    9.20    1.40
  -2   8  -8    6.10    1.70
  -8  -2   8    9.70    1.20
   8   2   8    7.80    1.00
  -8  -8  -3    6.40    0.80
  -8  -8  -3    5.20    0.70
  -3  -8  -8    4.10    0.80
   8  -8   3    6.60    0.80
   8  -8   3    6.80    0.90
  -8  -3  -8    8.30    1.00
  -8  -3  -8    7.20    0.80
  -8  -3  -8    5.60    0.90
  -8  -3  -8    5.10    0.70
   8   3  -8    5.60    0.80
   3   8  -8    6.90    1.00
  -3  -8  -8    6.50    0.80
   3   8  -8    6.40    1.70
  -8   3   8    8.10    1.20
  -3  -8  -8    6.40    0.90
   8  -3   8    6.70    0.90
  -8   8   3    4.70    1.50
  -3  -8  -8    7.20    0.70
  -8  -3   8    9.00    0.90
  -8   3  -8    6.50    0.90
  -8   8  -3    6.40    2.00
  -3   8  -8    9.70    1.90
  -3   8  -8    8.80    1.00
  -3   8  -8    7.10    0.80
   3  -8  -8    6.80    0.70
   3  -8  -8    6.10    0.80
   3  -8  -8    5.20    1.00
   3  -8  -8    7.00    1.10
  -8   3  -8    6.40    1.30
  -8  -8   3    7.20    1.10
   8  -8  -3    7.60    0.80
   8  -8  -3    5.80    0.90
  -8  -8   3    6.40    0.80
  -8  -8   3    4.50    0.70
   8  -3  -8    7.50    0.80
   8  -3  -8    6.30    0.80
   8  -3  -8    6.10    0.80
  -8   8  -3    6.70    1.30
  -8  -3   8    7.40    1.10
   8   3   8    6.30    0.90
  -8  -8  -4   21.90    1.40
  -8  -8  -4   19.00    1.30
  -4  -8  -8   17.80    1.10
   8  -8   4   19.30    1.30
   8  -8   4   17.30    1.50
  -8  -4  -8   16.80    1.40
  -8  -4  -8   19.10    1.40
  -8  -4  -8   19.50    1.40
  -8  -4  -8   17.50    1.30
   8   8  -4   21.30    2.80
  -4  -8  -8   20.10    1.50
  -4  -8  -8   20.00    1.40
   4   8  -8   14.60    2.10
   4   8  -8   20.10    1.60
  -8   4   8   17.20    1.80
   8  -4   8   21.00    1.50
  -4  -8  -8   16.00    1.30
  -8   8   4   22.80    2.50
  -8  -8   4   19.10    1.70
  -8   4  -8   20.70    2.50
  -8   8  -4   20.50    1.90
  -8  -4   8   20.40    1.40
  -4   8  -8   19.80    2.10
  -4   8  -8   20.10    1.50
   4  -8  -8   18.60    1.20
   4  -8  -8   20.10    1.30
   4  -8  -8   23.70    1.70
   4  -8  -8   20.50    1.60
  -8   4  -8   19.50    1.50
  -8   4  -8   17.50    1.70
   8  -8  -4   20.50    1.20
   8  -8  -4   19.50    1.50
  -8  -8   4   19.20    1.30
  -8  -8   4   19.60    1.30
   8  -4  -8   19.10    1.20
   8  -4  -8   18.60    1.30
   8  -4  -8   19.10    1.50
  -8   8  -4   20.40    2.70
  -8  -4   8   20.70    1.60
  -8  -8  -5   95.09    3.40
  -8  -8  -5   96.49    3.20
  -8  -8  -5   97.49    3.20
   8   5  -8   94.79    3.00
   8   5  -8   93.99    3.20
   8   5  -8   91.79    3.00
  -8  -5  -8   88.79    3.10
  -8  -5  -8   93.99    3.20
  -8  -5  -8   94.89    3.20
  -8  -5  -8   96.09    3.20
   8   8  -5   91.89    4.90
   8  -5   8   93.49    3.40
  -5   8   8   99.29    4.00
   8  -8   5   93.79    3.20
   8  -8   5   93.89    3.20
  -8   5   8   93.39    3.60
   5   8  -8   92.39    3.30
  -8   8   5   96.99    4.00
  -5  -8  -8   92.59    3.00
  -5  -8  -8   97.19    3.30
  -5  -8  -8   95.19    3.10
  -5  -8  -8   93.39    3.30
   5   8  -8   96.99    4.60
  -8   8  -5  102.79    4.00
  -8   5  -8   94.59    4.50
   5  -8  -8   98.99    3.10
   5  -8  -8   97.79    3.20
   5  -8  -8   97.09    3.40
   5  -8  -8   93.59    3.40
  -5   8  -8  100.19    3.40
  -8  -5   8   82.69    3.90
   8  -8  -5   95.29    3.10
   8  -8  -5   96.29    3.10
   8  -8  -5   97.79    3.40
   8  -8  -5   94.49    3.40
  -8   5  -8   99.49    3.30
  -8   5  -8   95.89    4.20
   8  -5  -8   94.09    3.00
   8  -5  -8   94.79    3.10
   8  -5  -8   96.29    3.30
  -8  -5   8   94.89    3.10
  -8  -8   5   94.89    3.40
  -8  -8   5   95.39    3.20
  -8  -8   5   90.49    3.10
  -5   8  -8   93.69    4.20
  -8  -8  -6    9.30    1.10
  -8  -8  -6    9.20    0.90
  -8  -8  -6    9.20    0.90
   8   6  -8    9.60    1.00
   8   6  -8    8.00    1.00
   8   6  -8    9.80    1.00
  -8  -6  -8    9.90    0.90
  -8  -6  -8    9.20    1.00
  -8  -6  -8   11.40    1.20
  -8  -6  -8    9.20    1.00
  -6  -8  -8    8.10    0.90
   8  -6   8    7.80    1.10
  -6   8   8   10.50    1.60
   8  -8   6   10.50    1.10
  -8   6   8   11.00    1.50
   8   8  -6   13.60    2.30
  -8   8   6    8.90    1.60
  -6  -8  -8    9.60    0.80
   8  -8   6   10.80    1.20
  -6  -8  -8   10.00    0.90
  -6  -8  -8   10.80    1.10
   6   8  -8   11.20    2.10
   6   8  -8   10.60    1.20
  -6   8  -8    9.80    1.20
  -8  -6   8   10.50    1.20
   6  -8  -8   10.30    1.00
   6  -8  -8    7.70    0.90
   6  -8  -8    9.30    1.10
   6  -8  -8    6.80    1.00
  -6  -8   8    9.20    0.90
  -6   8  -8    9.90    1.90
   8  -8  -6    9.50    0.80
   8  -8  -6    9.50    0.90
   8  -8  -6    7.60    1.10
   8  -8  -6   10.70    1.20
  -8   6  -8    9.90    1.10
  -8   6  -8    8.60    2.00
   8  -6  -8   11.20    1.10
   8  -6  -8    8.80    0.90
   8  -6  -8    7.10    1.00
  -8  -6   8    8.20    0.90
  -8  -8   6    7.20    1.10
  -8  -8   6    9.80    0.90
  -8  -8   6   12.70    1.20
  -8   8  -6   10.00    1.70
  -8  -8  -7  395.26   10.90
  -8  -8  -7  387.16   10.80
  -8  -8  -7  390.96   10.80
   8   8  -7  384.66   12.00
   7  -8   8  366.76   10.90
  -8  -7  -8  357.46   10.50
  -8  -7  -8  378.46   10.90
  -8  -7  -8  385.46   10.80
   8  -7   8  372.06   11.00
   8   7  -8  371.16   10.60
   8   7  -8  364.16   10.70
  -8   7   8  395.46   11.30
   8  -8   7  371.56   10.90
  -8   8   7  368.06   11.30
  -7  -8  -8  364.36   10.60
  -7  -8  -8  373.96   10.90
  -7  -8  -8  389.06   10.80
  -7  -8  -8  388.36   11.00
   8   7  -8  373.26   10.70
   7   8  -8  373.26   11.90
  -7   8   8  376.76   11.30
  -8   8  -7  364.46   11.50
   7  -8  -8  383.06   10.70
   7  -8  -8  392.76   10.80
   7  -8  -8  393.36   11.00
   7  -8  -8  376.86   11.00
  -8  -8   7  371.96   10.60
  -7   8  -8  382.46   11.60
   8  -8  -7  393.16   10.70
   8  -8  -7  377.16   10.70
   8  -8  -7  383.06   11.00
   8  -8  -7  349.57   11.10
  -7   8  -8  366.36   11.00
   8  -7  -8  393.96   10.70
   8  -7  -8  394.66   10.70
   8  -7  -8  374.46   11.00
   8  -7  -8  383.86   11.00
  -8  -7   8  387.66   10.70
  -8   7  -8  381.86   11.60
  -8   7  -8  389.36   10.90
  -7  -8   8  383.36   10.70
  -8  -8   7  378.16   10.70
  -8  -8  -8  182.78    6.10
  -8  -8  -8  209.38    6.40
  -8  -8  -8  217.98    6.30
  -8  -8  -8  226.88    6.40
   8   8  -8  203.08    6.20
   8   8  -8  211.88    7.70
   8  -8   8  198.48    6.50
   8  -8  -8  215.88    6.20
   8  -8  -8  208.98    6.50
   8  -8  -8  211.98    6.50
  -8   8  -8  221.28    7.20
  -8  -8   8  199.28    6.10
  -8  -8   8  210.18    6.20
  -9   0   0   -0.30    7.90
  -9   0   0   -0.10    0.90
  -9   0   0    0.70    0.50
  -9   0   0    0.50    0.50
   0  -9   0    0.10    0.50
   0   0  -9    0.40    0.50
   9   0   0   -2.50    7.80
   9   0   0    0.80    0.60
   0  -9   1    8.50    7.50
   0   9  -1   -5.70    9.00
   1   0  -9    6.50    6.40
   1   0  -9    0.70    0.50
   1   0  -9    0.40    0.50
   9  -1   0   -0.70    8.30
   9  -1   0   -0.30    0.60
   9   1   0   -5.70    8.00
   9   1   0    0.40    0.60
  -9   1   0    0.50    1.00
  -9   1   0    0.20    0.40
  -9   1   0    0.60    0.70
  -1   0  -9   -1.10    4.80
  -1   0  -9    0.60    0.50
  -1   0  -9   -0.20    0.50
   0  -9  -1   -0.50    0.60
  -9  -1   0    0.20    0.50
  -9  -1   0  -12.40    8.00
  -9  -1   0    1.30    1.60
  -9  -1   0    0.40    0.50
  -9   1   0   -8.00    8.40
  -9  -2   0   -0.70    0.90
   0   9  -2    0.40    1.20
   2   0  -9   -0.20    0.50
  -2   0  -9   -0.90    0.40
   0  -9  -2   -0.40    0.50
   0  -9  -2   -0.80    0.70
   0  -9   2   -4.10    8.40
   0   9  -2    1.90    9.60
  -2   0  -9   -0.30    0.50
  -2   0  -9   -2.40    3.80
  -2   0  -9    0.10    0.50
   2   0  -9   -0.40    0.50
  -9  -2   0   -1.10    0.50
  -9  -2   0   -0.60    0.50
  -9   2   0  -12.30    9.10
  -9   2   0   -0.80    1.00
  -9   2   0   -0.60    0.40
   9  -2   0    6.80    8.50
   9  -2   0   -0.90    0.50
   9  -2   0   -0.30    0.60
  -9   2   0   -0.20    0.70
   0  -9   3  -13.00    6.60
   0   9  -3   13.50   10.40
   0   9  -3   -2.40    1.10
   0  -9  -3   -0.10    0.80
  -3   0  -9    0.00    0.50
  -3   0  -9   -0.40    0.40
   0  -9  -3    0.30    0.30
   0  -9  -3    1.00    0.60
   0  -9  -3   -0.70    0.60
  -3   0  -9    1.00    1.80
  -3   0  -9   -0.20    0.50
  -9  -3   0    0.10    0.60
  -9   3   0   -7.60    9.30
  -9   3   0   -0.40    1.10
   3   0  -9   -0.80    0.50
   3   0  -9    0.90    0.50
  -9   3   0    0.50    0.70
  -3   0  -9   -0.10    0.40
   9  -3   0    0.50    0.60
  -9  -3   0    0.10    0.50
   3   0   9   -0.20    0.50
   9  -3   0   -9.20    9.00
   4   0  -9    0.70    0.60
  -9   4   0   -0.50    1.30
  -9   4   0   -0.30    1.00
  -4   0  -9   -0.20    0.40
  -4   0  -9   -0.70    0.60
  -4   0  -9   -0.10    0.50
   4   0  -9   -0.60    0.50
   4   0  -9   -0.50    0.70
   0   9   4    0.00    0.90
   0  -9   4   -6.10    9.60
   0   9  -4   16.70    8.90
   0   9  -4   -1.20    1.30
   9  -4   0   -7.30   10.10
   9  -4   0    0.20    0.60
  -9  -4   0    0.00    0.60
  -9  -4   0    0.90    0.50
  -9   4   0   10.30   11.20
  -4   0  -9   -0.10    0.40
   0  -9  -4    0.70    0.60
   0  -9  -4    0.10    0.70
   0  -9  -4   -1.70    0.70
   4   0   9    0.20    0.50
  -4   0  -9   -0.30    1.00
   0  -9  -4    0.40    0.30
  -5   0  -9    0.90    0.50
  -9  -5   0   -0.20    0.50
  -5   0  -9   -1.40    0.90
   0  -9  -5    0.40    0.80
  -5   0  -9   -0.40    0.50
  -5   0  -9   -0.30    0.50
   0   9  -5    9.70   11.90
   0   9  -5   -1.40    1.30
   5   0  -9    0.00    0.50
   5   0  -9   -0.90    0.60
   5   0  -9   -1.00    0.70
   5   0   9   -0.10    0.50
   0  -9   5    2.50   10.70
   9  -5   0   -0.70    0.60
  -9   5   0   -1.10    1.10
  -5   0  -9    0.40    0.50
  -5   0   9   -0.60    0.70
   0  -9  -5    0.30    0.30
   0  -9  -5    0.50    0.60
  -9   5   0    1.20    1.30
  -9  -5   0   -0.20    0.50
   0  -9  -5   -0.10    0.70
  -9  -5   0    0.20    0.70
  -9   6   0   -0.60    1.00
  -9   6   0   -1.80    1.30
  -9  -6   0   -1.20    0.50
   6   0  -9   -0.50    0.70
   6   0   9   -0.80    0.60
   0  -9  -6    0.30    0.60
   0  -9  -6    0.00    0.80
   0  -9  -6   -0.80    0.80
   0   9  -6    1.30    1.40
   9  -6   0    0.20    0.60
  -9  -6   0   -0.50    0.70
  -9  -6   0   -0.60    0.50
   6   0  -9   -0.60    0.60
  -6   0  -9   -1.30    0.90
   0   9  -6   -1.60    0.80
   6   0  -9   -0.10    0.60
  -6   0  -9   -0.10    0.60
  -6   0  -9   -0.10    0.50
  -6   0  -9    1.00    0.60
  -6   0   9   -0.20    0.80
  -9   6   0    0.90    1.40
  -6   0  -9    1.30    0.50
   0  -9  -6   -0.50    0.50
   7   0  -9   -0.10    0.70
   0  -9  -7   -0.60    0.60
   7   0  -9   -0.90    0.60
  -7   0  -9    0.60    0.70
  -7   0  -9   -0.30    0.70
  -7   0  -9   -0.60    0.90
   0   9  -7    0.00    0.80
   0  -9  -7    0.60    0.50
   9  -7   0    1.00    0.70
   0  -9  -7    0.90    0.90
  -7   0   9    0.50    0.80
  -9  -7   0    0.70    0.60
  -9   7   0   -0.40    1.50
  -9   7   0    1.30    1.00
  -9  -7   0    0.70    0.60
   7   0  -9    1.10    0.70
   0  -9  -7    0.60    0.70
   0  -9  -7    1.40    0.80
   0   9  -7    0.40    1.40
   7   0   9    0.60    0.70
   0  -9  -8    1.30    0.70
  -9   8   0    0.40    1.80
  -8   0  -9    0.40    0.70
  -8   0  -9    0.30    0.80
  -9  -8   0    0.90    0.60
  -8   0   9   -0.50    0.90
   0  -9  -8    0.90    0.60
  -8   0  -9   -0.60    0.90
  -9   8   0   -0.20    1.00
  -9  -8   0    0.00    0.60
   0  -9  -8    0.80    0.80
   0  -9  -8   -1.10    0.90
   0   9  -8   -1.90    1.40
   0   9  -8    1.70    0.80
   8   0  -9    0.60    0.70
   8   0  -9    0.70    0.70
   8   0  -9    0.60    0.70
   8   0   9    0.50    0.70
   9  -8   0    0.90    0.70
   1  -9   0   -0.20    0.50
   0  -1  -9    0.40    0.50
   1  -9   0  -16.50    8.10
  -9   0   1    0.70    8.70
  -9   0   1    0.80    1.00
   0   1  -9    1.20    5.90
  -9   0   1    0.00    0.50
   0   1  -9   -0.30    0.50
   0   1  -9    0.00    0.50
   1  -9   0    0.70    0.60
   9   0  -1    1.00    6.50
   9   0  -1    0.10    0.60
   9   0   1    0.10    0.60
  -1  -9   0   -0.20    0.60
   0  -1  -9   -6.50    5.10
  -9   0   1   -0.20    0.40
   0  -1  -9   -0.20    0.50
  -9   0  -1    0.40    0.50
  -9   0  -1    0.00    0.50
  -9   0  -1   -0.80    1.10
  -9  -1  -1   74.89    2.50
   1  -9   1   72.29    2.50
   1   1  -9   75.79    2.40
  -1  -1  -9   67.19    2.40
   1  -9   1   73.29    8.50
  -9   1   1   76.69    2.90
  -9   1   1   73.69    2.40
   9  -1   1   75.09    2.50
   1   1  -9   66.79    2.40
   9   1  -1   81.19   10.30
   9   1  -1   79.79    2.50
  -9  -1  -1   74.99    2.50
  -1  -9  -1   74.19    2.50
  -1  -1  -9   76.49    6.70
   1  -9   1   80.09    2.70
  -9   1   1   77.29    2.60
  -9   1   1   77.19   11.20
  -9  -1  -1   75.49    3.00
   9  -1  -1   79.89   10.20
  -9  -1   1   76.79    2.50
   1  -1  -9   69.19    2.40
   1  -1  -9   73.99    2.40
  -1   9  -1   81.19    9.90
  -9  -1   1   76.29    2.50
   1  -9  -1   75.29    2.50
  -9  -1   1   76.49   10.80
  -1   1  -9   76.39    2.40
  -9  -1   1   73.39    2.90
  -1   1  -9   71.19    2.40
  -1   1  -9   74.09    2.40
  -1   1  -9   76.99    2.40
  -9   1  -1   72.79    2.40
  -9   1  -1   73.49    2.60
   9  -1  -1   75.79    2.50
   1  -9  -1   73.59    2.70
  -9   1  -1   72.99    3.10
   1  -1  -9   72.39    9.40
  -1   9  -1   72.29    3.20
  -9  -2  -1  143.79    4.30
  -9   2   1  140.69    4.20
   2   1  -9  150.48    4.30
  -9   2   1  147.99    4.80
  -9   2   1  154.98   15.80
   9  -2   1  142.29    4.30
   9   2  -1  146.19   11.80
   1   9  -2  145.09   16.50
  -2  -1  -9  132.19    4.20
  -9  -2  -1  142.09    4.30
   2   1  -9  134.79    4.20
  -9   2   1  150.38    4.50
   1  -9   2  170.98   14.20
  -2  -1  -9  144.39    4.20
  -1  -9  -2  142.19    4.30
  -2   1  -9  142.89    9.30
  -2   1  -9  145.49    4.20
  -2   1  -9  149.39    4.20
  -9   2  -1  147.89    5.00
  -1  -9   2  164.48   13.40
   9  -2  -1  142.49    4.30
  -9  -2   1  125.69   14.20
  -9  -2   1  141.09    4.60
   2   1   9  148.09    4.30
   2  -1  -9  130.19    4.20
   2  -1  -9  137.99    4.30
  -1   9  -2  141.89    4.80
   1  -9  -2  143.79    4.30
  -2   1  -9  138.19    4.20
  -9  -2   1  139.19    4.30
  -2   1  -9  149.88    4.20
  -9   2  -1  142.49    4.50
  -9  -2   1  137.09    4.30
   1  -9  -2  146.89    4.50
   9  -2  -1  144.49   14.10
   9  -2  -1  138.39    4.10
  -1   9  -2  125.89   15.60
  -3  -1  -9    4.30    0.50
  -1  -9  -3    5.30    0.90
  -3  -1  -9    5.90    0.60
  -1   9   3    4.50    0.90
   3   1  -9    5.00    0.70
   3   1  -9    5.40    0.70
  -1  -9  -3    6.40    0.70
  -1  -9  -3    4.10    0.70
  -9  -3  -1    4.50    0.70
   9  -3   1    3.80    0.60
  -9   3   1   -1.20    9.90
   1  -9   3    5.60    9.10
  -9   3   1    4.20    0.90
  -3  -1  -9    4.90    0.50
  -9  -3  -1    4.90    0.70
   1   9  -3    6.10    1.40
  -9   3   1    5.60    1.20
   1   9  -3   -3.60   10.00
  -3  -1  -9    4.50    0.60
   1  -9  -3    5.30    0.50
   9  -3  -1    5.30    0.80
   1  -9  -3    5.10    0.90
   1  -9  -3    6.50    1.00
   9  -3  -1    3.90    0.50
   9  -3  -1    6.20    9.30
  -9  -3   1    5.30    0.60
  -9   3  -1    4.50    1.30
  -3   1  -9    7.00    0.60
   3  -1  -9    4.40    0.60
   3  -1  -9    6.10    0.70
  -3   1  -9    4.40    0.60
  -3   1  -9    5.80    0.70
   3  -1  -9    5.20    0.80
  -1  -9   3   22.50    9.10
  -1   9  -3   12.40   10.90
  -1   9  -3    3.80    1.20
   1  -9  -3    4.70    0.70
  -3   1  -9    5.90    0.60
  -3   1  -9    8.20    4.50
  -3   1  -9    6.60    1.40
  -9  -3   1    3.70    0.70
  -9  -3   1    5.70    1.10
   1   9  -4    0.80    1.40
  -1  -9  -4    2.60    0.50
  -9   4   1    3.00    1.20
  -1  -9  -4    2.90    0.80
   4   1  -9    1.80    0.60
   4   1  -9    2.80    0.60
   4   1  -9    3.90    0.70
  -9   4   1   -8.20   11.30
  -9  -4  -1    2.30    0.60
  -4   1   9    0.40    0.80
  -4  -1  -9   -0.10    0.90
  -4  -1  -9    2.20    0.50
   1  -9   4   -9.60    7.30
  -9   4   1    2.40    1.00
  -4  -1  -9    2.00    0.50
  -9  -4  -1    1.60    0.60
   4  -1   9    2.80    0.60
  -4  -1  -9    3.00    0.60
  -1  -9  -4    2.20    0.70
   1   9  -4   -4.90   11.00
  -4  -1  -9    2.50    0.60
  -9  -4  -1    1.30    0.60
   9  -4   1    3.30    0.70
  -9  -4   1    1.00    1.00
   9  -4  -1    8.90    9.60
   4  -1  -9    2.50    0.60
  -9  -4   1    2.70    0.60
  -9   4  -1    4.90    1.10
  -4   1  -9    2.00    0.50
  -1   9  -4  -13.40   11.20
   4  -1  -9    1.60    0.70
   4  -1  -9    2.20    1.00
  -1  -9   4    3.40    9.70
   9  -4  -1    2.80    0.70
  -9  -4   1    1.60    0.70
   9  -4  -1    1.30    0.50
   4   1   9    2.90    0.60
   4  -1  -9    2.60    0.60
  -4   1  -9    2.10    0.50
  -9   4  -1    3.10    1.50
  -4   1  -9    1.90    0.50
  -4   1  -9    3.50    1.20
  -4   1  -9    4.60    4.10
  -1   9  -4    6.80    1.50
   1  -9  -4    2.20    0.30
   1  -9  -4    3.10    0.60
   1  -9  -4    2.20    0.70
   1  -9  -4    2.40    0.90
  -4   1  -9    1.80    0.50
  -5  -1  -9   61.49    2.20
  -9  -5  -1   68.29    2.20
  -5  -1  -9   61.39    2.10
  -9   5   1   64.89    3.00
  -9  -5  -1   55.59    2.50
  -5  -1  -9   63.59    2.50
   1   9  -5   60.99    3.30
   5   1  -9   62.29    2.30
  -1  -9  -5   62.59    2.30
  -1  -9  -5   58.59    2.40
  -1  -9  -5   60.19    2.10
   5  -1   9   64.59    2.40
  -5  -1  -9   62.89    2.10
   5   1  -9   64.49    2.30
   9  -5   1   61.19    2.30
  -9   5   1   63.39    3.10
  -5  -1  -9   66.09    2.20
   9  -5   1   66.09    2.10
  -5   1   9   63.09    2.50
  -9  -5  -1   57.39    2.40
   1  -9   5   69.09   11.40
   1   9  -5   83.69   13.80
  -1  -9  -5   61.29    2.00
   5   1  -9   59.39    2.20
  -9   5   1   71.99   11.80
   5  -1  -9   64.89    2.30
  -9   5  -1   63.29    3.00
   9  -5  -1   64.99   12.60
  -1  -9   5   35.20   10.90
  -9  -5   1   59.89    2.60
   5  -1  -9   58.79    2.40
   1  -9  -5   64.79    2.30
   1  -9  -5   66.09    2.50
  -5   1  -9   61.69    2.20
  -5   1  -9   61.29    2.20
  -5   1  -9   63.79    2.10
   1  -9  -5   58.79    2.40
  -5   1  -9   65.39    2.20
   5  -1  -9   64.59    2.30
   9  -5  -1   61.99    2.00
  -5   1  -9   65.59    2.80
  -1   9  -5   36.60   10.60
  -1   9  -5   64.99    3.20
  -9   5  -1   60.19    3.30
   5   1   9   62.89    2.30
  -9  -5   1   58.99    2.40
   9  -5  -1   61.59    2.90
  -9  -5   1   62.59    2.20
   5  -1  -9   60.49    2.10
  -9  -6  -1  760.72   22.80
  -6  -1  -9  825.12   22.60
  -9  -6  -1  834.62   22.60
  -6   1   9  836.02   22.80
  -9   6   1  790.52   22.70
  -6  -1  -9  840.22   22.50
  -9  -6  -1  871.31   22.70
   1   9  -6  795.42   23.30
   6  -1   9  840.12   22.80
  -9   6   1  893.51   23.40
   6   1  -9  821.52   22.70
   6   1  -9  811.42   22.60
  -6  -1  -9  838.32   22.80
  -6  -1  -9  802.52   22.60
   6   1  -9  801.82   22.50
  -1  -9  -6  825.12   22.60
  -1  -9  -6  855.51   22.70
  -1  -9  -6  847.12   22.60
   1   9  -6  823.62   22.70
  -6  -1  -9  818.52   22.60
  -1  -9  -6  824.72   22.70
  -9   6   1  849.91   23.20
   9  -6   1  867.51   22.60
  -1   9  -6  819.82   22.80
  -9  -6   1  858.41   22.70
   9  -6  -1  844.62   22.70
  -1   9  -6  792.92   23.30
   6  -1  -9  863.81   22.70
  -9  -6   1  819.72   22.60
   6  -1  -9  831.02   22.60
   1  -9  -6  841.42   22.60
   1  -9  -6  827.02   22.70
   1  -9  -6  835.42   22.90
   1  -9  -6  821.62   22.80
  -9  -6   1  768.22   22.80
  -6  -1   9  817.22   22.80
   6   1   9  840.42   22.80
  -6   1  -9  847.62   23.00
  -6   1  -9  822.92   22.70
  -9   6  -1  809.32   23.20
  -6   1  -9  819.42   22.60
  -9  -6   1  787.82   22.80
  -6   1  -9  842.12   22.60
  -9   6  -1  847.12   23.50
  -9   6  -1  787.82   22.80
  -6   1  -9  807.12   22.50
   6  -1  -9  789.72   22.50
  -7  -1  -9 1051.89   28.30
  -1  -9  -7 1083.19   28.60
  -9  -7  -1 1073.59   28.40
  -7  -1  -9 1034.30   28.40
   7   1  -9  990.30   28.30
   1   9  -7 1019.20   29.20
   7   1  -9 1035.40   28.40
  -7   1   9 1027.40   28.70
  -1  -9  -7 1039.30   28.40
   9  -7   1 1069.79   28.40
   1   9  -7 1063.09   28.60
  -9   7   1 1012.60   28.60
  -7  -1  -9 1021.90   28.40
   7   1  -9 1086.69   28.60
   9  -7   1 1026.60   28.50
  -7  -1  -9 1064.69   28.60
  -9   7   1 1025.60   29.20
  -9  -7  -1 1043.20   28.50
  -1  -9  -7 1053.09   28.40
  -7  -1  -9  985.60   28.30
  -1  -9  -7 1067.29   28.50
  -7  -1  -9  980.40   28.40
   9  -7  -1 1056.99   28.60
  -1   9  -7 1021.70   29.20
  -9  -7   1 1034.70   28.50
   1  -9  -7 1109.49   28.50
  -9   7  -1 1053.59   29.40
   1  -9  -7 1071.69   28.60
  -7  -1   9 1089.29   28.70
  -7   1  -9 1005.40   28.40
   7  -1  -9  987.20   28.30
   7  -1  -9 1025.00   28.50
  -9   7  -1  933.01   29.00
  -9  -7   1  995.80   28.50
   1  -9  -7 1065.79   28.40
  -9   7  -1 1035.20   28.70
   1  -9  -7 1074.19   28.70
  -7   1  -9 1100.39   28.80
  -9  -7   1 1054.99   28.40
   7   1   9 1055.89   28.60
  -1   9  -7 1026.70   28.60
   7  -1  -9 1065.39   28.50
  -8  -1  -9  488.45   14.00
  -8  -1  -9  505.35   14.00
  -8  -1  -9  521.95   14.30
  -8  -1  -9  480.75   14.00
  -1  -9  -8  514.35   14.20
   1   9  -8  501.55   15.10
  -9   8   1  519.25   15.10
   8   1  -9  521.05   14.20
  -9   8   1  494.85   14.30
   8   1  -9  483.45   14.10
  -9  -8  -1  529.35   14.20
  -9  -8  -1  519.65   14.10
  -1  -9  -8  521.25   14.20
  -8   1   9  516.05   14.40
   1   9  -8  521.55   14.20
   9  -8   1  505.05   14.20
   8   1  -9  472.95   13.90
  -1  -9  -8  498.45   14.00
   8  -1   9  518.55   14.30
  -1  -9  -8  504.45   14.00
   9  -8   1  505.05   14.00
  -8  -1   9  497.55   14.30
   8   1   9  502.35   14.30
  -9  -8   1  532.95   14.20
  -1   9  -8  516.75   15.00
  -1   9  -8  506.95   14.20
   1  -9  -8  526.75   14.20
   1  -9  -8  486.95   14.30
   1  -9  -8  500.65   14.30
  -9  -8   1  527.85   14.10
  -9   8  -1  501.85   14.40
  -9   8  -1  490.65   15.30
   1  -9  -8  525.35   14.10
   8  -1  -9  468.45   13.90
  -9  -8   1  486.55   14.20
   9  -8  -1  502.85   14.20
  -8   1  -9  523.95   14.50
  -8   1  -9  483.95   14.00
   8  -1  -9  511.95   14.20
   8  -1  -9  504.85   14.10
  -9   0   2  486.55   13.40
   0   2  -9  506.15   13.40
   2  -9   0  489.95   13.60
  -9   0   2  491.75   13.50
  -2  -9   0  497.25   13.60
  -2   9   0  455.95   13.70
   0  -2  -9  499.05   17.00
  -9   0  -2  459.45   13.90
   0  -2  -9  506.65   13.40
   0   2  -9  509.75   13.40
   0   2  -9  486.45   14.70
  -9   0   2  509.75   13.70
   9   0  -2  468.75   21.80
   9   0  -2  486.45   13.50
   9   0   2  489.65   13.50
   0  -2  -9  462.45   13.40
   2  -9   0  460.75   20.60
   2  -9   0  489.45   13.40
   0   2  -9  464.15   13.40
  -9   0  -2  485.75   13.50
  -9   0   2  485.95   22.80
   0   2  -9  488.45   13.40
  -9   0  -2  472.05   13.50
  -1  -2  -9   71.39    2.30
   2  -9   1   56.09   10.30
   2  -9   1   69.29    2.40
  -9  -1  -2   69.39    2.40
  -2   9   1   68.49    2.80
  -1  -2  -9   67.99    5.60
  -1  -2  -9   65.29    2.30
  -9   1   2   71.09    2.50
  -2  -9  -1   71.79    2.50
   9   1  -2   82.09   10.60
  -9   1   2   67.29    2.80
   9  -1   2   71.69    2.40
   2  -9   1   72.19    2.60
   1   2  -9   71.69    2.40
  -9   1   2   64.69   11.60
   9   1  -2   71.29    2.40
  -9   1   2   69.79    2.30
   1   2  -9   70.09    3.70
   1   2  -9   65.49    2.30
  -1   2  -9   73.09    2.30
   9  -1  -2   70.09    2.40
  -1   2  -9   71.39    2.30
   2  -9  -1   68.89    2.60
  -9  -1   2   69.59    2.40
   9  -1  -2   71.19    9.10
  -9   1  -2   71.09    2.60
   9  -1  -2   71.89    2.30
  -9  -1   2   68.29    2.70
   1  -2  -9   64.79    2.30
  -1   2  -9   70.59    2.30
   2  -9  -1   70.19    2.40
  -2   9  -1   87.09   11.80
  -2   9  -1   71.29    2.90
  -9  -1   2   65.29   10.70
  -1   2  -9   66.99    2.30
   1   2   9   71.09    2.30
  -9  -1   2   69.99    2.40
   1  -2  -9   70.59    2.30
  -9   1  -2   68.79    3.20
  -2   9   2    6.40    1.00
  -2  -9  -2    6.60    0.80
  -9   2   2   12.80   10.10
  -9  -2  -2    5.60    0.70
  -9  -2  -2    6.40    0.70
  -9   2   2    7.50    0.90
  -9   2   2    5.50    1.00
  -2  -2  -9    4.90    0.60
  -2  -2  -9    4.90    0.60
   2   2  -9    7.70    1.80
   2   2  -9    5.20    0.70
   2  -9   2    2.70    7.10
   9  -2   2    7.00    0.80
   9   2  -2    4.80    9.30
   9   2  -2    6.00    0.80
  -9   2   2    6.00    0.70
   2  -9   2    6.40    0.90
  -2   2  -9    6.30    0.60
  -2   2  -9    7.80    0.80
   9  -2  -2    7.00    0.60
   2  -2  -9    7.50    0.70
  -2   9  -2    9.20    1.30
  -9   2  -2    5.00    1.30
  -9  -2   2    6.50    0.70
   2   2   9    6.20    0.70
   9  -2  -2    1.70    7.20
  -9  -2   2    7.30    0.90
   2  -2  -9    5.20    0.60
   2  -2  -9    7.40    0.80
  -2   2  -9    5.30    0.60
  -2   2  -9    6.70    0.70
   2  -9  -2    5.30    0.80
   9  -2  -2    7.70    0.80
  -9   2  -2    4.60    0.90
  -9  -2   2    6.80    1.00
  -2   9  -2   15.20   11.00
  -9   3   2    0.50    0.40
  -3  -2  -9    2.60    0.70
   9   3  -2   16.00   10.40
   3   2  -9    0.00    0.60
  -2  -9  -3    0.80    0.70
  -9   3   2    0.60    1.00
  -9  -3  -2    0.50    0.60
  -3   2   9    0.20    0.70
  -9  -3  -2    0.60    0.60
  -2  -9  -3    0.00    0.40
   2  -9   3    4.40    9.30
   2  -9   3    0.60    0.70
  -3  -2  -9   -0.30    0.50
   9  -3   2    0.00    0.50
   9  -3   2    0.10    0.50
  -9  -3  -2   -0.40    0.50
   3   2  -9    0.40    0.50
  -2   9   3   -0.90    0.80
   2   9  -3   -1.00    1.30
  -9   3   2  -11.00   11.40
  -2  -9  -3    0.10    0.60
  -9   3   2    1.00    0.80
  -9  -3   2   -0.40    0.50
   3   2   9   -0.10    0.50
  -3   2  -9    0.10    0.60
  -9   3  -2    2.00    1.30
  -2   9  -3   -5.00   11.00
  -9   3  -2    0.80    0.90
  -3   2  -9    0.10    0.40
   3  -2  -9    0.10    0.50
   2  -9  -3    0.20    0.20
  -3   2  -9   -0.30    0.40
  -9  -3   2   -0.30    0.60
  -9  -3   2    0.10    0.90
   9  -3  -2    0.50    0.50
   9  -3  -2    0.80    0.60
   3  -2  -9   -0.30    0.60
  -2   9  -3    0.10    1.10
  -3   2  -9   -0.30    0.40
   2  -9  -3   -0.80    0.80
   2  -9  -3   -0.10    0.50
   2  -9  -3   -0.10    0.70
   3  -2  -9    1.10    0.70
   9  -3  -2    7.70    7.80
  -4  -2  -9   13.10    1.00
  -2  -9  -4   15.20    1.30
   2   9  -4   15.10    1.80
  -9   4   2   15.80    1.90
   4   2  -9   15.70    1.40
  -9  -4  -2   17.00    1.20
  -4  -2  -9   16.50    0.90
  -4  -2  -9   14.80    0.90
  -2  -9  -4   15.80    1.20
  -4   2   9   15.00    1.40
  -9   4   2   16.90    1.80
  -4  -2  -9   16.30    1.50
   9  -4   2   15.50    1.20
   4   2  -9   13.90    1.20
   4   2  -9   16.60    1.20
   2  -9   4    8.60   10.30
  -2  -9  -4   14.60    0.90
   9  -4   2   16.60    1.00
  -9  -4  -2   13.50    1.20
  -9  -4  -2   13.80    1.10
  -9   4   2   24.50   12.30
   4   2   9   14.60    1.10
   9  -4  -2   16.80    1.00
  -9   4  -2   12.20    1.30
   2  -9  -4   15.60    1.10
   4  -2  -9   16.70    1.40
  -4   2  -9   16.70    1.60
  -4   2  -9   14.30    1.10
  -4   2  -9   15.70    1.10
   9  -4  -2   -1.20   10.10
  -9  -4   2   15.60    1.60
  -4   2  -9   16.10    1.10
   4  -2  -9   15.80    1.30
   4  -2  -9   14.10    1.00
  -9  -4   2   15.80    1.10
  -2   9  -4   17.80    1.70
   2  -9  -4   17.10    1.30
  -2   9  -4  -11.80   11.70
  -9   4  -2   11.00    1.60
  -4   2  -9   15.80    1.00
   4  -2  -9   14.80    1.10
  -9  -5  -2   21.70    1.50
   5   2  -9   24.40    1.40
   5   2  -9   23.50    1.40
  -2  -9  -5   23.10    1.30
   2   9  -5   26.60    2.60
   9  -5   2   23.50    1.20
  -9  -5  -2   24.40    1.30
   9  -5   2   23.50    1.40
  -9  -5  -2   25.30    1.70
  -2  -9  -5   23.80    1.10
  -5   2   9   25.20    1.60
   5   2  -9   21.60    1.30
  -5  -2  -9   22.90    1.30
  -5  -2  -9   23.20    1.10
  -2  -9  -5   23.90    1.40
  -5  -2  -9   25.90    1.60
  -9   5   2   21.20    2.20
  -5  -2  -9   23.70    1.70
  -5  -2  -9   25.00    1.10
  -2  -9  -5   20.80    1.50
  -9   5   2   23.30    2.20
  -2  -9  -5   22.70    1.20
  -5   2  -9   25.20    2.10
  -9  -5   2   25.60    1.30
   5  -2  -9   23.70    1.30
   5  -2  -9   24.00    1.40
  -5   2  -9   24.50    1.30
   2  -9  -5   24.00    1.60
   5  -2  -9   21.10    1.20
  -5   2  -9   24.40    1.30
   5  -2  -9   24.20    1.60
   5   2   9   25.50    1.40
   2  -9  -5   27.50    1.40
  -2   9  -5   24.00    2.30
  -5   2  -9   23.70    1.20
  -9  -5   2   25.10    1.70
   9  -5  -2   24.60    1.50
  -9   5  -2   25.80    2.70
   2  -9  -5   24.10    1.60
  -5   2  -9   25.90    1.30
   9  -5  -2   25.00    1.20
  -6   2   9    1.20    0.80
  -9  -6  -2    1.20    0.80
  -6  -2  -9    0.50    0.50
   6   2  -9    1.00    0.70
  -6  -2  -9    0.30    0.60
   9  -6   2    0.80    0.60
  -9  -6  -2    0.30    0.60
  -9  -6  -2    0.70    0.60
  -2  -9  -6    0.20    0.50
  -2  -9  -6    0.80    0.70
  -2  -9  -6    1.20    0.60
   6  -2   9    0.50    0.70
   2   9  -6    0.40    1.40
  -6  -2  -9   -0.60    0.80
  -6  -2  -9    0.50    0.50
  -6  -2  -9   -0.70    0.70
   6   2  -9   -1.00    0.70
   9  -6   2    0.20    0.60
  -9   6   2    2.60    1.40
   2   9  -6    1.30    0.90
   6   2  -9    1.00    0.70
  -2  -9  -6   -0.20    0.80
  -2  -9  -6    0.00    0.50
  -9   6   2    0.20    1.30
   2  -9  -6    0.10    0.80
   2  -9  -6    0.20    0.80
   9  -6  -2   -0.40    0.70
   6  -2  -9    0.40    0.60
  -6   2  -9    0.20    1.10
   2  -9  -6   -0.10    0.60
  -2   9  -6    0.00    0.80
  -9  -6   2   -0.10    0.60
  -9   6  -2    1.00    1.80
  -9   6  -2    0.10    1.20
   2  -9  -6   -0.20    0.50
   6  -2  -9    0.40    0.60
   6   2   9    0.50    0.60
  -9   6  -2   -1.00    1.10
  -2   9  -6   -0.20    1.50
  -9  -6   2    1.40    0.90
  -9  -6   2    1.00    0.60
  -6   2  -9    0.60    0.60
   6  -2  -9   -0.30    0.70
  -6   2  -9   -0.10    0.70
   9  -6  -2   -0.10    0.60
   7  -2   9   22.00    1.50
  -2  -9  -7   26.20    1.40
  -7  -2  -9   25.10    1.70
   2   9  -7   26.80    1.70
   7   2  -9   24.20    1.50
  -2  -9  -7   24.70    1.30
  -7  -2  -9   27.20    1.30
  -7   2   9   27.20    1.80
   2   9  -7   29.40    2.90
  -2  -9  -7   26.30    1.50
   9  -7   2   25.00    1.50
   7   2  -9   23.90    1.50
  -9   7   2   27.20    2.60
   7   2  -9   25.30    1.50
  -2  -9  -7   27.80    1.60
  -7  -2  -9   25.20    1.50
  -9  -7  -2   26.70    1.50
  -9  -7  -2   26.70    1.40
  -7  -2  -9   23.50    1.40
  -7  -2  -9   24.70    1.30
   9  -7   2   25.50    1.30
   2  -9  -7   23.80    1.70
   7  -2  -9   24.20    1.40
  -9  -7   2   25.50    1.40
  -7   2  -9   27.00    1.50
  -7   2  -9   24.40    2.40
  -7  -2   9   26.30    1.80
   2  -9  -7   27.20    1.80
  -9  -7   2   24.60    1.80
  -9  -7   2   25.40    1.40
  -9   7  -2   26.70    3.20
   2  -9  -7   26.90    1.30
   2  -9  -7   27.10    1.50
  -2   9  -7   25.10    1.70
  -9   7  -2   23.80    2.20
   7   2   9   25.30    1.60
   9  -7  -2   27.60    1.40
   9  -7  -2   26.20    1.60
  -2   9  -7   28.40    2.70
  -9   7  -2   25.50    2.20
   7  -2  -9   26.30    1.30
  -8   2   9  262.17    7.60
  -2  -9  -8  248.98    7.20
  -8  -2  -9  240.58    7.30
   9  -8   2  248.98    7.20
   8   2  -9  257.17    7.40
   8   2  -9  224.88    7.40
  -8  -2  -9  255.17    7.50
  -9  -8  -2  256.07    7.30
   2   9  -8  245.68    8.40
  -2  -9  -8  245.48    7.40
   8  -2   9  254.47    7.50
   2   9  -8  253.77    7.40
  -8  -2  -9  246.18    7.20
  -8  -2  -9  238.08    7.20
  -9   8   2  240.98    8.20
   9  -8   2  257.87    7.40
  -2  -9  -8  258.47    7.40
  -2  -9  -8  257.67    7.20
  -9   8   2  243.28    7.50
  -9  -8  -2  264.57    7.30
   8   2  -9  235.48    7.20
   2  -9  -8  255.47    7.50
  -8   2  -9  254.37    7.80
  -9  -8   2  254.97    7.20
   9  -8  -2  260.07    7.50
   8  -2  -9  254.97    7.30
  -9  -8   2  244.48    7.40
   2  -9  -8  260.17    7.50
  -8   2  -9  246.18    7.30
  -9   8  -2  254.47    7.70
  -8  -2   9  244.28    7.80
  -9   8  -2  237.48    8.60
   2  -9  -8  249.58    7.30
   8   2   9  255.87    7.50
   9  -8  -2  242.58    7.50
   2  -9  -8  252.47    7.20
  -2   9  -8  265.17    8.30
   8  -2  -9  239.48    7.10
   8  -2  -9  257.77    7.30
  -9  -8   2  261.17    7.30
  -2   9  -8  258.27    7.40
  -9   0   3    0.40    0.40
  -3   9   0    0.50    1.00
   9   0  -3   -5.50    9.20
  -9   0  -3    1.60    1.40
  -9   0   3    0.60    0.80
   0   3  -9   -0.50    0.60
   0  -3  -9   -0.40    0.70
   3  -9   0    1.10    0.70
   3  -9   0   -0.40    0.50
   9   0  -3    0.30    0.60
   0  -3  -9    0.40    0.50
   0   3  -9    0.80    0.50
   0   3  -9   -0.40    1.60
   0  -3  -9    2.40    4.80
   0   3  -9    0.10    0.60
   0   3  -9    0.00    0.50
   0   3   9    0.60    0.40
  -9   0   3   -0.40    0.60
   9   0   3    0.20    0.60
  -9   0   3    2.80   10.60
   0  -3  -9   -0.20    0.50
  -9   0  -3   -0.10    0.60
   1   3  -9    4.00    0.70
  -1  -3  -9   -0.80    3.00
  -9  -1  -3    2.50    0.60
   9   1  -3    3.10    0.60
  -3   9   1    4.40    1.00
  -9   1   3   26.00   10.70
  -9   1   3    3.50    0.80
  -9  -1  -3    3.70    0.70
   9  -1   3    3.60    0.70
   3  -9   1    2.80    0.70
  -3  -9  -1    3.10    0.70
   3  -9   1   12.60    8.90
   9   1  -3   -0.60    9.80
  -9   1   3    3.40    0.50
   1   3  -9    1.00    1.60
   1   3  -9    3.20    0.60
   3  -9   1    2.10    0.80
   1   3  -9    2.90    0.60
  -1  -3  -9    2.90    0.60
  -1   3   9    3.80    0.50
  -1  -3  -9    3.60    0.60
   1   3  -9    1.90    0.50
  -9   1   3    2.70    1.00
   9  -1   3    2.40    0.60
  -9  -1   3    3.70    0.60
  -3   9  -1   -0.70   11.00
  -9  -1   3    4.70   10.50
  -1   3  -9    3.20    0.60
   1  -3  -9    3.50    0.80
  -1   3  -9    3.30    0.60
   3  -9  -1    4.70    0.60
   3  -9  -1    2.40    0.80
  -1   3  -9    2.50    0.60
  -1   3  -9    1.80    1.70
   9  -1  -3    4.30    0.70
  -1   3  -9    2.90    0.70
   9  -1  -3    2.30    7.70
   9  -1  -3    3.40    0.60
   1  -3  -9    2.20    0.60
   1   3   9    3.50    0.60
  -9   1  -3    4.40    1.60
  -9   1  -3    2.30    0.80
  -3   9  -1    0.80    1.00
  -9  -1   3    2.70    0.90
  -9  -1   3    3.50    0.60
   1  -3  -9    2.60    0.50
   2   3  -9  242.58    7.00
  -9   2   3  228.28   19.10
  -3  -9  -2  261.57    7.20
  -9  -2  -3  245.08    7.10
  -9  -2  -3  248.28    7.10
  -9  -2  -3  241.78    7.00
  -9   2   3  238.48    7.40
  -9   2   3  243.78    6.90
   2   3  -9  253.57    7.00
   2   3  -9  249.28    8.10
   9   2  -3  243.58    7.10
   2   3  -9  248.38    7.10
  -2  -3  -9  251.57    7.00
  -3   9   2  252.77    7.30
  -2  -3  -9  232.58    6.90
   3  -9   2  250.57    7.10
   9  -2   3  256.97    7.10
   2   3  -9  241.98    7.00
   9  -2   3  246.28    7.00
   3  -9   2  239.68   17.00
  -9   2   3  244.78    7.20
   9   2  -3  215.68   17.70
  -3  -9  -2  230.48    7.00
  -9   2  -3  246.18    7.80
  -2   3  -9  249.08    7.00
   9  -2  -3  250.87    6.90
   9  -2  -3  240.88   15.40
   2  -3  -9  248.18    7.10
  -9   2  -3  257.27    7.30
  -9  -2   3  252.17    7.00
  -9  -2   3  237.38    7.30
  -2   3  -9  228.98    8.00
  -2   3  -9  258.97    7.10
   9  -2  -3  244.68    7.10
  -2   3  -9  253.27    7.00
   3  -9  -2  248.88    7.20
  -2   3  -9  247.18    6.90
   2   3   9  254.47    7.00
   2  -3  -9  224.38    7.10
   2  -3  -9  236.68    6.90
   2  -3  -9  243.18    7.00
  -3   9  -2  260.67   19.40
  -3   9  -2  243.78    7.40
   3  -9  -2  255.97    7.00
   3  -9   3 1069.29   29.30
  -9   3   3 1057.39   29.60
   3   3  -9 1028.10   29.20
  -3  -9  -3 1057.39   29.20
  -9  -3  -3 1056.59   29.20
   3   3  -9 1094.39   29.30
   9  -3   3 1094.39   29.20
   9   3  -3 1043.80   38.40
   3   9  -3  989.50   29.70
  -9   3   3 1060.99   29.10
  -9   3   3 1067.39   29.40
  -3  -9  -3 1072.89   29.20
   9  -3   3 1161.78   29.30
  -3  -9  -3 1148.59   29.40
  -9  -3  -3 1045.30   29.30
  -9  -3  -3 1082.19   29.30
  -3   3   9 1146.59   29.50
  -3  -3  -9 1015.00   29.10
   3   3  -9 1061.49   30.10
  -9   3   3  989.20   39.00
  -3  -3  -9 1069.49   29.40
   3  -9   3  970.10   37.50
  -3  -3  -9 1104.09   29.20
  -9   3  -3 1085.99   30.00
  -3   3  -9 1143.19   29.30
  -9  -3   3 1098.09   29.20
   3  -3  -9 1092.39   29.20
  -3   9  -3 1071.89   29.60
   3  -9  -3 1131.59   29.20
   3  -9  -3 1062.59   29.50
   3  -3  -9 1056.19   29.30
  -3   3  -9 1082.99   29.10
   9  -3  -3 1071.19   29.10
  -3   3  -9 1039.00   29.20
  -9  -3   3 1098.49   29.40
  -3   3  -9 1119.29   29.30
  -3   3  -9 1052.99   30.30
   3   3   9 1094.29   29.30
  -9   3  -3 1160.28   29.60
   3  -9  -3  996.00   29.30
   3  -3  -9 1047.90   29.10
   3  -3  -9 1140.49   29.30
  -3   9  -3 1047.50   38.90
   9  -3  -3 1046.20   37.00
   9  -3  -3  954.80   29.40
  -9  -4  -3 1177.28   33.30
  -4   3   9 1223.08   33.50
  -9  -4  -3 1166.28   33.40
   9   4  -3 1225.18   33.10
  -9   4   3 1285.27   33.80
  -9   4   3 1239.88   33.70
  -3  -9  -4 1225.58   33.40
  -4  -3  -9 1256.87   33.40
   4   3  -9 1226.88   33.40
  -3  -9  -4 1271.57   33.40
  -4  -3  -9 1171.18   33.40
  -3  -9  -4 1156.28   33.30
  -3  -9  -4 1315.67   33.50
   9  -4   3 1248.58   33.40
   9   4  -3 1225.58   33.10
  -4  -3  -9 1201.58   33.30
   9  -4   3 1312.37   33.40
  -3  -9  -4 1221.78   33.40
   4   3  -9 1210.88   34.30
   4   3  -9 1189.08   33.30
   3  -9   4 1164.18   41.90
   3  -9   4 1215.48   33.40
   3   9  -4 1175.38   33.90
  -4  -3  -9 1164.48   33.30
  -9  -4  -3 1189.08   33.50
  -9  -4   3 1232.08   33.40
  -9  -4   3 1252.07   33.60
  -4   3  -9 1243.58   33.40
  -4   3  -9 1252.87   33.20
   9  -4  -3 1242.58   33.20
   4  -3  -9 1170.08   33.30
   4   3   9 1265.17   33.50
   3  -9  -4 1233.88   33.50
  -4   3  -9 1294.97   33.50
  -3   9  -4 1131.99   42.90
   9  -4  -3 1237.78   33.50
   4  -3  -9 1225.68   33.40
   4  -3  -9 1256.47   33.40
  -3   9  -4 1249.57   33.80
  -4   3  -9 1303.17   33.40
  -9   4  -3 1241.58   34.20
  -9   4  -3 1124.19   34.00
   4  -3  -9 1218.98   33.50
   3  -9  -4 1263.17   33.40
   3  -9  -4 1229.08   33.60
  -5  -3  -9   43.30    1.60
  -5  -3  -9   41.80    1.90
  -5   3   9   44.30    2.10
   5   3  -9   43.60    1.80
   5   3  -9   47.40    1.90
  -3  -9  -5   43.50    1.70
   3   9  -5   43.50    3.10
  -9   5   3   44.00    2.70
  -5  -3  -9   43.20    1.90
   9  -5   3   46.70    1.90
  -9  -5  -3   44.80    1.80
  -9  -5  -3   45.40    1.90
  -9  -5  -3   43.00    2.00
  -3  -9  -5   46.40    1.70
  -5  -3  -9   41.50    1.70
  -3  -9  -5   44.40    1.90
  -3  -9  -5   45.30    1.80
  -3  -9  -5   44.00    1.90
  -9   5   3   42.70    2.50
  -5  -3  -9   44.00    1.80
  -5  -3  -9   45.60    1.60
   5   3  -9   42.70    1.80
   9  -5   3   47.20    1.80
   3  -9  -5   47.60    1.80
   5  -3  -9   45.20    1.80
   9  -5  -3   44.30    1.90
  -5   3  -9   42.40    1.80
  -9   5  -3   43.20    3.40
  -5   3  -9   47.90    2.80
  -9  -5   3   46.40    1.80
  -3   9  -5   43.20    2.70
  -9   5  -3   45.40    2.60
   3  -9  -5   42.90    2.10
   3  -9  -5   43.40    2.00
  -9  -5   3   43.90    2.10
   5   3   9   44.80    1.90
  -5   3  -9   43.20    1.60
   5  -3  -9   45.70    1.90
   5  -3  -9   43.60    2.00
   5  -3  -9   44.30    1.70
   9  -5  -3   45.60    1.70
  -9  -6  -3  192.18    5.50
  -6  -3  -9  177.88    5.30
  -6  -3  -9  177.88    5.50
  -6  -3  -9  193.28    5.40
  -3  -9  -6  176.88    5.30
  -3  -9  -6  190.08    5.60
  -3  -9  -6  194.68    5.40
  -3  -9  -6  186.98    5.50
  -9   6   3  190.18    6.10
  -9   6   3  172.58    6.10
  -6  -3  -9  176.08    5.30
  -9  -6  -3  187.88    5.40
   9  -6   3  186.58    5.50
  -6  -3  -9  184.68    5.50
   3   9  -6  188.48    6.50
   3   9  -6  176.88    5.60
   9  -6   3  191.28    5.50
  -6   3   9  180.18    5.70
  -3  -9  -6  180.08    5.40
  -6  -3  -9  181.48    5.30
   6  -3   9  185.88    5.60
   6   3  -9  181.68    5.40
   6   3  -9  187.68    5.60
   6   3  -9  183.38    5.40
   6  -3  -9  187.78    5.50
   6  -3  -9  177.78    5.60
   9  -6  -3  187.48    5.60
   3  -9  -6  191.28    5.50
   3  -9  -6  188.48    5.70
  -3   9  -6  184.18    6.20
  -3   9  -6  190.28    5.60
   3  -9  -6  188.38    5.40
  -9   6  -3  182.78    6.20
   3  -9  -6  178.68    5.60
   6   3   9  186.38    5.60
   9  -6  -3  181.68    5.30
  -9  -6   3  183.78    5.50
  -6   3  -9  181.98    5.50
  -6   3  -9  187.88    6.10
   6  -3  -9  189.88    5.50
   6  -3  -9  176.38    5.30
  -9  -6   3  188.48    5.70
  -9   6  -3  171.08    6.70
  -9   6  -3  172.08    5.90
  -3  -9  -7  288.07    8.10
  -9  -7  -3  293.87    8.30
   7   3  -9  287.67    8.20
  -7  -3  -9  273.07    8.10
  -7  -3  -9  270.07    8.10
   7   3  -9  292.17    8.40
   7   3  -9  276.07    8.10
  -7  -3  -9  277.47    8.20
  -9  -7  -3  283.27    8.20
  -3  -9  -7  277.27    8.30
   9  -7   3  296.17    8.20
   7  -3   9  286.47    8.40
  -7  -3  -9  279.87    8.10
  -7  -3  -9  292.67    8.30
  -3  -9  -7  295.17    8.20
  -7   3   9  289.27    8.50
   3   9  -7  284.17    9.20
   3   9  -7  281.67    8.30
  -7  -3  -9  292.67    8.20
  -3  -9  -7  300.27    8.40
  -9   7   3  289.97    9.00
   3  -9  -7  290.17    8.40
  -3   9  -7  293.07    9.10
   9  -7  -3  290.27    8.40
   7  -3  -9  298.47    8.30
  -9  -7   3  285.37    8.40
  -9  -7   3  294.27    8.20
  -9  -7   3  280.77    8.10
  -9   7  -3  275.57    9.50
  -9   7  -3  286.97    8.60
  -9   7  -3  261.77    9.00
  -7   3  -9  281.67    8.20
   7   3   9  286.47    8.40
  -7   3  -9  290.77    8.80
   3  -9  -7  292.57    8.50
   9  -7  -3  286.27    8.10
   7  -3  -9  276.47    8.10
   3  -9  -7  287.17    8.20
  -7  -3   9  290.07    8.50
   7  -3  -9  298.77    8.30
   3  -9  -7  296.37    8.30
  -3   9  -7  300.67    8.40
   8   3  -9   14.00    1.20
   9  -8   3   12.50    1.40
   8  -3   9   12.10    1.50
  -8  -3  -9   14.00    1.00
  -8  -3  -9   13.30    1.00
  -9  -8  -3   13.00    1.20
   8   3  -9    9.80    1.00
   3   9  -8   14.20    1.20
   3   9  -8   14.20    2.20
  -3  -9  -8   12.70    1.00
  -9  -8  -3   11.40    1.20
  -8   3   9    9.30    1.20
   8   3  -9   10.70    1.10
  -3  -9  -8   11.20    1.10
  -9   8   3   11.50    1.80
  -3  -9  -8   14.40    1.40
  -8  -3  -9   12.40    1.20
  -3  -9  -8   11.90    1.00
  -8  -3  -9   13.40    1.20
   9  -8   3   14.80    1.20
  -9  -8   3   12.80    1.30
  -8   3  -9    9.40    1.50
   3  -9  -8   11.70    1.30
  -9   8  -3   14.50    1.60
  -9  -8   3   12.20    1.20
   8  -3  -9   12.60    1.20
   8  -3  -9   13.30    1.40
  -8   3  -9   13.30    1.30
  -3   9  -8   13.20    1.90
  -8  -3   9   15.70    1.70
  -9  -8   3   13.00    1.10
   8   3   9   12.40    1.50
   9  -8  -3   11.60    1.10
  -3   9  -8   12.20    1.20
   3  -9  -8   10.00    1.10
   3  -9  -8   13.90    1.30
   9  -8  -3   13.20    1.40
   8  -3  -9   10.90    1.10
   3  -9  -8   14.80    1.10
   0   4  -9    9.90    0.80
   0   4  -9    9.90    0.90
  -9   0   4   26.30   11.60
  -9   0  -4    7.70    0.70
   0   4  -9   10.20    1.90
  -9   0   4   10.00    0.90
  -4   9   0    8.10    2.10
  -9   0  -4    7.90    1.90
  -9   0  -4   11.00    1.00
   0  -4  -9    8.90    0.90
   0  -4  -9    9.00    1.00
   0  -4  -9    8.80    1.00
   0   4  -9    9.60    1.00
  -4   9   0    8.30    1.10
  -9   0   4    9.00    0.90
   0  -4  -9   10.90    1.00
   0   4   9    9.90    0.80
   4  -9   0   12.60    1.00
   4  -9   0    8.30    0.90
   9   0  -4   28.80   11.10
   9   0  -4    8.90    0.90
   9   0  -4    8.70    0.90
   9   0   4    8.20    1.00
   9   0   4    8.50    0.80
   0  -4  -9    6.90    5.30
  -9   0   4    9.10    1.10
  -9   1   4  552.04   15.30
  -4  -9  -1  528.45   15.20
  -9   1   4  559.24   26.50
   1   4  -9  578.44   15.30
  -9   1   4  547.75   15.20
   4  -9   1  546.55   15.20
  -1  -4  -9  575.64   15.30
  -1  -4  -9  524.55   15.30
  -4   9   1  573.54   15.50
  -9   1   4  554.84   15.60
  -9  -1  -4  563.84   15.40
  -1   4   9  576.34   15.20
   9   1  -4  537.95   23.60
   9   1  -4  567.44   15.30
   4  -9   1  503.85   22.70
   9  -1   4  601.04   15.40
   9  -1   4  579.34   15.30
   1   4  -9  561.54   16.50
   1   4  -9  533.05   15.30
   1   4  -9  570.14   15.30
   1   4  -9  568.64   15.30
  -4  -9  -1  564.54   15.40
  -1  -4  -9  547.75   16.50
  -9  -1  -4  543.05   15.20
   4  -9   1  551.04   15.40
  -1  -4  -9  534.05   15.20
  -4   9   1  485.85   16.10
  -4   9  -1  542.95   15.60
   9  -1  -4  515.75   15.30
   4  -9  -1  566.54   15.20
  -9   1  -4  557.34   15.50
   1  -4  -9  554.04   15.30
   9  -1  -4  589.04   25.80
  -9   1  -4  566.94   16.10
   9  -1  -4  563.74   15.40
  -1   4  -9  572.54   15.20
  -4   9  -1  471.85   16.10
   1   4   9  576.74   15.20
  -1   4  -9  550.54   15.30
   1  -4  -9  545.75   15.20
  -9  -1   4  496.15   26.10
  -9  -1   4  554.04   15.50
  -9  -1   4  557.94   15.30
   1  -4  -9  530.25   15.40
   4  -9  -1  561.74   15.40
  -1   4  -9  565.94   15.30
  -1   4  -9  549.74   16.10
   1  -4  -9  559.44   15.30
  -1   4  -9  553.44   15.30
  -4   9  -1  665.03   35.70
  -9   2   4  299.97    8.80
  -4   9   2  311.37    8.90
  -2  -4  -9  319.37    8.70
  -9   2   4  312.97    9.00
  -4  -9  -2  324.47    8.80
   9   2  -4  312.87    8.70
  -2  -4  -9  293.17    8.70
  -9   2   4  292.77    8.50
  -4  -9  -2  313.07    8.70
  -4  -9  -2  291.37    8.60
  -4  -9  -2  299.17    8.70
   9  -2   4  314.87    8.80
   9  -2   4  297.37    8.60
   2   4  -9  293.97    9.60
  -2   4   9  311.67    8.50
  -9  -2  -4  297.77    8.80
  -9  -2  -4  316.37    8.80
  -9  -2  -4  287.67    8.60
  -2  -4  -9  293.17    8.60
   9   2  -4  318.57   20.60
   4  -9   2  241.38   18.70
   4  -9   2  312.17    8.80
   2   4  -9  318.67    8.70
   2   4  -9  306.87    8.60
   2   4  -9  306.77    8.60
   2   4  -9  323.57    8.70
   2  -4  -9  308.37    8.70
  -9  -2   4  300.87    8.60
  -2   4  -9  308.17    9.60
  -9   2  -4  318.37    9.70
   2   4   9  308.87    8.60
   2  -4  -9  294.47    8.60
   2  -4  -9  317.37    8.70
   2  -4  -9  298.77    8.80
  -9  -2   4  304.17    8.90
   4  -9  -2  303.67    8.60
   4  -9  -2  301.57    8.80
  -2   4  -9  306.87    8.70
  -2   4  -9  297.67    8.70
  -2   4  -9  309.67    8.60
  -2   4  -9  310.07    8.70
  -9   2  -4  310.77    8.90
   9  -2  -4  305.87    8.60
  -4   9  -2  307.97    9.20
  -4   9  -2  331.57   21.50
   3   4  -9   29.50    1.50
  -9   3   4   26.40    2.00
   3   4  -9   25.70    1.30
   3   4  -9   27.80    3.10
  -4  -9  -3   28.90    1.60
  -9   3   4   27.00    1.10
  -3  -4  -9   28.10    1.40
  -4  -9  -3   28.50    1.40
  -4  -9  -3   27.70    1.50
  -3   4   9   28.40    1.10
  -9  -3  -4   24.70    1.50
  -4  -9  -3   28.60    1.40
  -9   3   4   27.50    1.90
   9  -3   4   26.20    1.40
   3   4  -9   26.30    1.30
  -3  -4  -9   28.90    1.60
   9  -3   4   28.30    1.40
   9   3  -4   28.50    9.90
   9   3  -4   24.10    1.60
   4  -9   3   23.30   11.50
   4  -9   3   25.50    1.60
   4   9  -3   29.60    2.80
  -9  -3  -4   27.50    1.30
  -3  -4  -9   27.70    1.30
   3   4  -9   26.90    1.40
  -9  -3  -4   28.60    1.50
   4  -9  -3   28.50    1.70
   3  -4  -9   26.00    1.30
   3  -4  -9   28.90    1.40
   3  -4  -9   25.40    1.60
  -4   9  -3   25.40    2.20
   3   4   9   29.60    1.40
   9  -3  -4   26.20    1.30
  -9   3  -4   29.70    3.00
   4  -9  -3   28.70    1.30
  -9  -3   4   27.70    1.70
  -3   4  -9   27.30    1.50
   3  -4  -9   26.90    1.60
   9  -3  -4   27.30    1.50
  -9   3  -4   28.10    2.10
   4  -9  -3   25.10    1.70
  -4   9  -3   26.10   10.30
  -3   4  -9   29.50    1.50
  -3   4  -9   25.60    1.30
  -3   4  -9   30.70    3.10
  -3   4  -9   29.10    1.40
  -9  -3   4   27.80    1.40
   4   4  -9    8.70    0.80
  -4  -4  -9   10.40    1.00
   4   4  -9    7.90    0.90
   4   4  -9    8.50    0.90
  -9  -4  -4    7.60    0.90
   4  -9   4    9.30    1.00
  -9   4   4    9.60    1.40
  -4  -9  -4    8.50    0.70
  -9  -4  -4    9.30    1.00
  -4   4   9    8.70    0.60
  -9  -4  -4    7.70    0.80
   4   9  -4   11.30    1.80
  -4  -4  -9    9.30    0.70
  -4   4   9    9.10    1.10
  -4  -9  -4    8.30    1.00
   4   4  -9    8.70    0.80
  -4  -9  -4    8.80    0.90
  -4  -9  -4    7.30    0.90
   9   4  -4   30.90   13.00
  -9   4   4    8.60    1.40
   9  -4   4   10.10    1.00
   9  -4   4   12.00    1.10
  -4  -9  -4    8.20    0.80
  -4  -4  -9    8.90    0.90
  -4  -4  -9    9.70    1.00
   4   4  -9    7.60    1.70
   4  -4  -9    7.20    1.00
   4  -9  -4    8.50    0.80
   4  -4  -9    7.00    0.70
  -4   4  -9    9.40    0.90
   4   4   9    9.50    1.00
  -9   4  -4    7.90    2.00
   4  -9  -4    7.40    1.00
   4  -9  -4    8.40    1.00
   9  -4  -4    9.80    0.90
   4  -4  -9    8.50    0.70
  -9  -4   4   10.00    0.80
   9  -4  -4    7.80    0.90
   4  -4  -9    9.20    1.00
  -9   4  -4    9.00    1.30
  -4   4  -9    8.20    0.90
  -4   4  -9    7.30    1.90
  -4   4  -9    8.30    0.90
  -4   9  -4    9.10    1.50
  -9  -4   4    8.80    1.00
  -4   4  -9    8.10    0.70
  -4  -9  -5   47.10    2.00
   4  -9   5   47.60    2.10
   4   9  -5   47.90    3.30
   9   5  -4   45.90    1.60
   5   4  -9   38.90    3.50
  -9  -5  -4   44.60    2.30
  -9  -5  -4   48.80    1.90
  -4  -9  -5   44.70    1.80
  -5  -4  -9   48.90    1.90
  -5  -4  -9   46.70    1.60
  -4  -9  -5   45.50    1.90
  -9   5   4   47.90    2.90
  -5   4   9   46.30    2.20
  -4  -9  -5   47.90    1.90
  -4  -9  -5   49.50    2.00
   9  -5   4   49.00    1.90
   9   5  -4   46.80    1.60
  -9  -5  -4   46.50    1.80
   5   4  -9   46.40    1.70
  -5  -4  -9   44.80    1.70
  -5  -4  -9   44.70    2.00
   5   4  -9   47.40    1.90
   5   4  -9   42.10    1.90
   5   4  -9   48.20    1.80
  -5  -4  -9   48.60    2.00
   9  -5   4   50.69    1.90
  -5  -4  -9   44.30    1.70
  -9   5   4   48.50    2.50
   5  -4  -9   45.40    2.10
  -9   5  -4   52.09    2.80
  -9   5  -4   46.10    3.40
   5  -4  -9   45.30    1.80
   4  -9  -5   48.00    2.20
  -9  -5   4   45.90    1.80
   5  -4  -9   48.30    2.10
   4  -9  -5   45.60    2.10
   5  -4  -9   48.90    1.90
   4  -9  -5   49.40    1.90
  -5   4  -9   47.00    3.40
  -5   4  -9   47.00    2.00
   5   4   9   46.70    2.00
   9  -5  -4   42.80    1.90
   9  -5  -4   48.10    2.00
  -9  -5   4   45.60    2.50
  -4   9  -5   46.30    2.80
  -6  -4  -9    2.80    0.50
  -6   4   9    1.90    0.90
  -6  -4  -9    2.00    0.80
   9  -6   4    1.50    0.70
   6   4  -9    2.90    0.80
   4   9  -6    1.30    1.70
  -4  -9  -6    1.70    0.60
  -4  -9  -6    2.20    0.70
  -4  -9  -6    2.00    0.70
  -6  -4  -9    2.20    0.60
  -6  -4  -9    2.10    0.50
  -6  -4  -9    2.60    0.80
  -9  -6  -4    2.20    0.70
  -9  -6  -4    1.40    0.60
  -6  -4  -9    2.10    0.70
   6  -4   9    3.00    0.80
   6   4  -9    1.30    0.50
  -4  -9  -6    1.60    0.70
   6   4  -9    1.60    0.50
  -9   6   4    2.50    1.20
   9  -6   4    1.70    0.70
   6   4  -9    3.10    0.80
  -4  -9  -6    1.80    0.80
   4  -9  -6    2.00    0.50
  -9   6  -4    3.70    1.40
  -9   6  -4    3.30    1.40
  -9  -6   4    1.10    0.90
   6  -4  -9    1.80    0.60
   9  -6  -4    2.10    0.70
   6  -4  -9    3.00    0.60
   6   4   9    2.60    0.80
   4  -9  -6    1.00    0.80
  -9   6  -4    1.30    1.80
  -4   9  -6    2.40    1.40
  -6   4  -9    1.50    1.40
  -6   4  -9    1.30    0.70
  -6   4  -9   -1.50    1.80
   9  -6  -4    1.90    0.70
   4  -9  -6    1.90    0.70
   4  -9  -6    0.90    0.80
   6  -4  -9    1.70    0.80
   6  -4  -9    2.40    0.80
  -9  -6   4    2.60    0.70
   9  -6  -4    2.20    0.60
  -7  -4  -9  161.98    4.80
  -7  -4  -9  161.18    4.90
   7  -4   9  163.08    5.10
   9  -7   4  161.78    4.90
  -9  -7  -4  160.08    4.80
   7   4  -9  150.48    4.80
  -7   4   9  161.08    5.10
  -4  -9  -7  157.28    4.70
  -7  -4  -9  155.28    4.80
   4   9  -7  167.58    6.00
  -7  -4  -9  150.48    4.70
  -7  -4  -9  155.58    4.70
   7   4  -9  162.18    4.70
  -4  -9  -7  163.08    4.90
   7   4  -9  156.88    4.70
   7   4  -9  154.88    4.80
   4   9  -7  153.78    5.00
  -4  -9  -7  161.38    5.00
  -9   7   4  165.98    5.60
   9  -7   4  158.28    4.90
  -9  -7  -4  158.78    4.90
  -7  -4  -9  156.28    4.60
  -4  -9  -7  162.88    4.80
  -9   7  -4  152.48    5.80
   4  -9  -7  165.18    4.80
  -9  -7   4  161.28    4.80
  -7   4  -9  161.28    5.70
  -9  -7   4  160.98    4.80
  -9   7  -4  158.48    5.40
   7  -4  -9  164.18    5.10
  -4   9  -7  165.98    5.80
  -4   9  -7  161.68    5.00
  -7   4  -9  152.88    6.00
  -7   4  -9  157.78    4.90
   4  -9  -7  158.98    5.10
   4  -9  -7  154.58    4.80
  -9  -7   4  159.68    5.00
   7   4   9  159.28    5.00
  -9   7  -4  151.28    6.40
   7  -4  -9  162.38    4.80
   4  -9  -7  151.78    5.00
   7  -4  -9  159.88    4.90
   7  -4  -9  159.08    4.70
   9  -7  -4  168.08    5.00
   9  -7  -4  157.88    4.70
  -9   8   4   -0.20    1.30
   8   4  -9    0.60    0.80
  -8  -4  -9    0.40    0.60
  -8  -4  -9    0.10    0.70
   4   9  -8   -1.60    1.70
   4   9  -8   -0.80    0.90
  -4  -9  -8    0.80    0.70
  -8  -4  -9    2.10    0.70
   9  -8   4    0.20    0.80
  -8  -4  -9    0.00    0.70
  -9  -8  -4    0.50    0.60
  -9  -8  -4    0.90    0.60
  -8  -4  -9    0.40    0.70
  -4  -9  -8    0.80    0.50
  -4  -9  -8   -0.30    0.70
   9  -8   4    1.30    0.80
  -8   4   9   -1.00    0.90
   8   4  -9   -0.10    0.70
  -8  -4  -9    0.90    0.60
   8  -4   9    0.10    0.80
  -4  -9  -8    0.30    0.70
  -9   8  -4    1.60    1.90
  -9  -8   4    0.70    0.90
  -8  -4   9    0.30    0.80
  -8   4  -9    0.80    0.80
   4  -9  -8   -0.30    0.50
  -4   9  -8    1.40    1.50
  -9   8  -4    2.00    1.40
  -8   4  -9    3.90    2.30
   8  -4  -9   -0.90    0.60
   8  -4  -9    0.60    0.60
   9  -8  -4    0.90    0.80
  -8   4  -9    0.80    1.40
  -9  -8   4    0.60    0.60
   8  -4  -9    0.80    0.80
   9  -8  -4   -0.20    0.60
   4  -9  -8    0.70    0.60
   4  -9  -8    1.00    0.90
   4  -9  -8    0.80    0.90
  -9  -8   4   -0.40    0.60
  -4   9  -8    2.00    0.90
  -9   0  -5   -0.40    0.70
  -9   0   5    0.40    0.90
  -9   0   5   -0.10    0.60
  -5  -9   0   -0.60    0.60
  -9   0  -5   -1.70    1.80
   0   5  -9   -0.40    0.60
   0   5  -9    0.20    0.60
   9   0  -5    0.50    0.60
  -9   0  -5    0.70    0.60
   9   0   5    1.10    0.60
   9   0   5   -0.20    0.60
   0  -5  -9   -0.50    0.70
   0  -5  -9    0.60    0.80
   5  -9   0    0.20    0.70
  -5  -9   0   -1.00    0.60
  -5   9   0    4.60    1.90
  -5   9   0    0.00    1.00
   5  -9   0    0.80    0.60
   9   0  -5   -1.30    1.10
   0   5  -9    0.40    0.60
   0   5  -9    0.40    0.50
   0   5  -9    0.10    1.60
   0  -5  -9    0.20    0.50
   0  -5  -9    0.10    0.50
   0   5   9    0.10    0.40
  -9   1   5   74.89    2.50
   9  -1   5   78.59    2.60
  -9  -1  -5   78.89    2.70
   9   1  -5   68.09    2.70
  -9   1   5   75.79    2.90
  -1   5   9   75.39    2.40
  -9  -1  -5   73.79    2.50
  -9  -1  -5   65.89    4.10
   9  -1   5   81.49    2.70
  -1  -5  -9   72.89    6.50
  -1  -5  -9   74.39    2.50
  -1  -5  -9   78.79    2.60
  -1  -5  -9   77.59    2.80
  -5  -9  -1   74.89    2.60
   1   5  -9   77.39    2.60
   1   5  -9   73.39    3.90
   1   5  -9   76.69    2.60
   1   5  -9   79.19    2.60
   5  -9   1   76.09    2.70
  -9   1   5   74.99    2.70
  -5  -9  -1   75.59    2.70
   5  -9   1   73.89    2.50
  -5   9   1   74.09    2.90
  -5   9   1   67.29    4.10
  -5   9  -1   77.49    3.00
   5  -9  -1   74.49    2.50
  -1   5  -9   77.59    2.70
  -9   1  -5   77.09    2.90
   9   1   5   80.49    2.70
  -1   5  -9   79.89    2.60
  -5  -9   1   71.29    2.60
  -1   5  -9   81.09    2.50
  -1   5  -9   76.19    2.60
   1  -5  -9   80.99    2.80
   1  -5  -9   74.69    2.50
   1   5   9   76.19    2.50
   5  -9  -1   78.69    2.20
  -9  -1   5   78.49    2.90
[truncated: 2,082,864 more chars]
